# Supplementary material
Source: publisher figshare collection journal article supplement (https://acs.figshare.com/ndownloader/files/4141840)
Supplement: Supplementary file 1 [file 4141840]

data_global

#==============================================================================

# SUBMISSION DETAILS

_publ_contact_author_name       'Axel Schulz'
_publ_contact_author_address
;
Universit\"at Rostock
Institut f\"ur Chemie
Abteilung f\"ur Anorganische Chemie
Albert-Einstein-Strasse 3a 
18059 Rostock
Bundesrepublik Deutschland
;
_publ_contact_author_email
;
axel.schulz@uni-rostock.de, alexander.villinger@uni-rostock.de'
;
_publ_contact_author_fax   '+49 (0)381/498-6382'
_publ_contact_author_phone '+49 (0)381/498-6400 or 6403'
_publ_requested_journal    'Inorg.Chem.'


#==============================================================================

# TITLE AND AUTHOR LIST

_publ_section_title   
;
Chlorine/Methyl Exchange Reactions In Silylated Aminostibanes - A New Route To 
Stibinostibonium Cations
;
_publ_section_title_footnote .

loop_
 _publ_author_name
 _publ_author_address
'Christian Hering'
;
Universit\"at Rostock
Institut f\"ur Chemie
Abteilung f\"ur Anorganische Chemie
Albert-Einstein-Strasse 3a 
18059 Rostock
Bundesrepublik Deutschland
;
'Mathias Lehmann'
;
Universit\"at Rostock
Institut f\"ur Chemie
Abteilung f\"ur Anorganische Chemie
Albert-Einstein-Strasse 3a 
18059 Rostock
Bundesrepublik Deutschland
;
'Axel Schulz'
;
Universit\"at Rostock
Institut f\"ur Chemie
Abteilung f\"ur Anorganische Chemie
Albert-Einstein-Strasse 3a 
18059 Rostock
Bundesrepublik Deutschland

Leibniz-Institut f\"ur Katalyse e.V.
an der Universit\"at Rostock
Albert-Einstein-Strasse 29a
18059 Rostock
Bundesrepublik Deutschland 
;
'Alexander Villinger'
;
Universit\"at Rostock
Institut f\"ur Chemie
Abteilung f\"ur Anorganische Chemie
Albert-Einstein-Strasse 3a 
18059 Rostock
Bundesrepublik Deutschland
;

#=============================================================================

data_av175_me3si2nsbcl2

_audit_author_name                'Villinger, A.' 
_audit_creation_method            SHELXL-97 

#==============================================================================

# CHEMICAL DATA

_chemical_name_systematic
;
N,N-bis(trimethylsilyl)amino(dichloro)stibane
;
_chemical_name_common             ?
_chemical_melting_point           ?
_chemical_formula_moiety          'C6 H18 Cl2 N Sb Si2'
_chemical_formula_sum
 'C6 H18 Cl2 N Sb Si2'
_chemical_formula_weight          353.04
 
loop_
 _atom_type_symbol
 _atom_type_description
 _atom_type_scat_dispersion_real
 _atom_type_scat_dispersion_imag
 _atom_type_scat_source
 'C'  'C'   0.0033   0.0016
 'International Tables Vol C Tables 4.2.6.8 and 6.1.1.4'
 'H'  'H'   0.0000   0.0000
 'International Tables Vol C Tables 4.2.6.8 and 6.1.1.4'
 'N'  'N'   0.0061   0.0033
 'International Tables Vol C Tables 4.2.6.8 and 6.1.1.4'
 'Si'  'Si'   0.0817   0.0704
 'International Tables Vol C Tables 4.2.6.8 and 6.1.1.4'
 'Cl'  'Cl'   0.1484   0.1585
 'International Tables Vol C Tables 4.2.6.8 and 6.1.1.4'
 'Sb'  'Sb'  -0.5866   1.5461
 'International Tables Vol C Tables 4.2.6.8 and 6.1.1.4'
 
#==============================================================================

# CRYSTAL DATA
 
_symmetry_cell_setting            trigonal
_symmetry_space_group_name_H-M    'P 32'
_symmetry_space_group_name_Hall   'P 32'
_symmetry_Int_Tables_number       145
 
loop_
 _symmetry_equiv_pos_as_xyz
 'x, y, z'
 '-y, x-y, z+2/3'
 '-x+y, -x, z+1/3'
 
_cell_length_a                    23.8910(4)
_cell_length_b                    23.8910(4)
_cell_length_c                    6.50720(10)
_cell_angle_alpha                 90.00
_cell_angle_beta                  90.00
_cell_angle_gamma                 120.00
_cell_volume                      3216.57(9)
_cell_formula_units_Z             9
_cell_measurement_temperature     173(2)
_cell_measurement_reflns_used     8917
_cell_measurement_theta_min       5.907
_cell_measurement_theta_max       59.031
 
_exptl_crystal_description        block
_exptl_crystal_colour             colourless
_exptl_crystal_size_max           0.34
_exptl_crystal_size_mid           0.18
_exptl_crystal_size_min           0.14
_exptl_crystal_density_meas       ?
_exptl_crystal_density_diffrn     1.640
_exptl_crystal_density_method     'not measured'
_exptl_crystal_F_000              1566
_exptl_absorpt_coefficient_mu     2.433
_exptl_absorpt_correction_type    'multi-scan'
_exptl_absorpt_correction_T_min   0.4917
_exptl_absorpt_correction_T_max   0.7269
_exptl_absorpt_process_details    '(SADABS; Sheldrick, 2004)'

#==============================================================================

# EXPERIMENTAL DATA
 
_exptl_special_details
;
 ?
;
 
_diffrn_ambient_temperature       173(2)
_diffrn_radiation_wavelength      0.71073
_diffrn_radiation_type            MoK\a
_diffrn_radiation_source          'sealed tube'
_diffrn_radiation_monochromator   graphite
_diffrn_measurement_device_type   'Bruker-Nonius Apex X8-CCD-diffractometer'
_diffrn_measurement_method        'phi and psi scans'
_diffrn_detector_area_resol_mean  ?
_diffrn_standards_number          ?
_diffrn_standards_interval_count  ?
_diffrn_standards_interval_time   ?
_diffrn_standards_decay_%         ?
_diffrn_reflns_number             54144
_diffrn_reflns_av_R_equivalents   0.0336
_diffrn_reflns_av_sigmaI/netI     0.0418
_diffrn_reflns_limit_h_min        -27
_diffrn_reflns_limit_h_max        35
_diffrn_reflns_limit_k_min        -35
_diffrn_reflns_limit_k_max        35
_diffrn_reflns_limit_l_min        -9
_diffrn_reflns_limit_l_max        9
_diffrn_reflns_theta_min          2.60
_diffrn_reflns_theta_max          32.02
_reflns_number_total              14600
_reflns_number_gt                 12450
_reflns_threshold_expression      >2\s(I)
 
_computing_data_collection        'Bruker Apex v2.0-2'
_computing_cell_refinement        'Bruker Apex v2.0-2'
_computing_data_reduction         'Bruker SAINT'
_computing_structure_solution     'SHELXS-97 (Sheldrick, 1997)'
_computing_structure_refinement   'SHELXL-97 (Sheldrick, 1997)'
_computing_molecular_graphics     'ORTEP-3 (Farrugia, 1997)' 
_computing_publication_material   'SHELXL-97'

#==============================================================================

# REFINEMENT DATA 

_refine_special_details
;
 The crystal was refined as a merohedral twin (1 1 0, 0 -1 0, 0 0 -1; BASF 
 0.17215). 
 All H atoms were positioned geometrically and refined using a 
 riding model , with C---H = 0.98 (methyl groups), 0.99\%A (methylene groups), 
 1.00\%A (methine groups) or 0.95 \%A (aryl CH) and with <i>U</i>~iso~(H) = 
 1.5 times <i>U</i>~eq~(C) (methyl groups) or with <i>U</i>~iso~(H) = 1.2 times 
 <i>U</i>~eq~(C) (methylene  groups, aryl CH, methine groups). Torsion angles 
 of all methyl groups were allowed to refine.
 
 Refinement of F^2^ against ALL reflections.  The weighted R-factor wR and
 goodness of fit S are based on F^2^, conventional R-factors R are based
 on F, with F set to zero for negative F^2^. The threshold expression of
 F^2^ > 2\s(F^2^) is used only for calculating R-factors(gt) etc. and is
 not relevant to the choice of reflections for refinement.  R-factors based
 on F^2^ are statistically about twice as large as those based on F, and R-
 factors based on ALL data will be even larger.
;
 
_refine_ls_structure_factor_coef  Fsqd
_refine_ls_matrix_type            full
_refine_ls_weighting_scheme       calc
_refine_ls_weighting_details
 'calc w=1/[\s^2^(Fo^2^)+(0.0167P)^2^+0.0000P] where P=(Fo^2^+2Fc^2^)/3'
_atom_sites_solution_primary      direct
_atom_sites_solution_secondary    difmap
_atom_sites_solution_hydrogens    geom
_refine_ls_hydrogen_treatment     constr
_refine_ls_extinction_method      none
_refine_ls_extinction_coef        ?
_refine_ls_abs_structure_details
 'Flack H D (1983), Acta Cryst. A39, 876-881'
_refine_ls_abs_structure_Flack    0.051(8)
_refine_ls_number_reflns          14600
_refine_ls_number_parameters      344
_refine_ls_number_restraints      1
_refine_ls_R_factor_all           0.0432
_refine_ls_R_factor_gt            0.0301
_refine_ls_wR_factor_ref          0.0463
_refine_ls_wR_factor_gt           0.0437
_refine_ls_goodness_of_fit_ref    0.982
_refine_ls_restrained_S_all       0.982
_refine_ls_shift/su_max           0.002
_refine_ls_shift/su_mean          0.000

#==============================================================================

# ATOMIC COORDINATES AND DISPLACEMENT PARAMETERS
 
loop_
 _atom_site_label
 _atom_site_type_symbol
 _atom_site_fract_x
 _atom_site_fract_y
 _atom_site_fract_z
 _atom_site_U_iso_or_equiv
 _atom_site_adp_type
 _atom_site_occupancy
 _atom_site_symmetry_multiplicity
 _atom_site_calc_flag
 _atom_site_refinement_flags
 _atom_site_disorder_assembly
 _atom_site_disorder_group
Sb1 Sb 0.601966(10) 0.229220(10) 0.06914(3) 0.02807(6) Uani 1 1 d . . .
Cl1 Cl 0.59818(4) 0.24728(4) -0.29123(15) 0.0391(2) Uani 1 1 d . . .
Cl2 Cl 0.50949(5) 0.23772(4) 0.15382(15) 0.0401(2) Uani 1 1 d . . .
N1 N 0.55992(12) 0.13272(12) 0.0684(4) 0.0234(5) Uani 1 1 d . . .
Si1 Si 0.60948(4) 0.10386(4) 0.16925(14) 0.0265(2) Uani 1 1 d . . .
Si2 Si 0.47891(4) 0.07887(5) -0.00747(14) 0.0266(2) Uani 1 1 d . . .
C1 C 0.6418(2) 0.0757(2) -0.0409(6) 0.0514(11) Uani 1 1 d . . .
H1A H 0.6059 0.0398 -0.1137 0.077 Uiso 1 1 calc R . .
H1B H 0.6701 0.0611 0.0171 0.077 Uiso 1 1 calc R . .
H1C H 0.6664 0.1113 -0.1370 0.077 Uiso 1 1 calc R . .
C2 C 0.68052(18) 0.16977(18) 0.3075(6) 0.0453(10) Uani 1 1 d . . .
H2A H 0.7067 0.2048 0.2111 0.068 Uiso 1 1 calc R . .
H2B H 0.7068 0.1526 0.3650 0.068 Uiso 1 1 calc R . .
H2C H 0.6653 0.1865 0.4188 0.068 Uiso 1 1 calc R . .
C3 C 0.5645(2) 0.0384(2) 0.3602(7) 0.0591(12) Uani 1 1 d . . .
H3A H 0.5498 0.0550 0.4732 0.089 Uiso 1 1 calc R . .
H3B H 0.5930 0.0234 0.4143 0.089 Uiso 1 1 calc R . .
H3C H 0.5270 0.0023 0.2936 0.089 Uiso 1 1 calc R . .
C4 C 0.47086(17) 0.00144(16) -0.1062(6) 0.0402(9) Uani 1 1 d . . .
H4A H 0.5021 0.0109 -0.2173 0.060 Uiso 1 1 calc R . .
H4B H 0.4270 -0.0263 -0.1586 0.060 Uiso 1 1 calc R . .
H4C H 0.4794 -0.0208 0.0056 0.060 Uiso 1 1 calc R . .
C5 C 0.45145(17) 0.11171(19) -0.2189(5) 0.0405(9) Uani 1 1 d . . .
H5A H 0.4529 0.1514 -0.1727 0.061 Uiso 1 1 calc R . .
H5B H 0.4071 0.0797 -0.2575 0.061 Uiso 1 1 calc R . .
H5C H 0.4799 0.1213 -0.3380 0.061 Uiso 1 1 calc R . .
C6 C 0.42395(17) 0.05995(17) 0.2179(6) 0.0402(9) Uani 1 1 d . . .
H6A H 0.4347 0.0373 0.3225 0.060 Uiso 1 1 calc R . .
H6B H 0.3791 0.0324 0.1737 0.060 Uiso 1 1 calc R . .
H6C H 0.4293 0.1002 0.2757 0.060 Uiso 1 1 calc R . .
Sb2 Sb 0.959391(10) 0.894853(10) 0.15731(4) 0.02895(5) Uani 1 1 d . . .
Cl3 Cl 1.05899(4) 0.89975(5) 0.08027(15) 0.0407(2) Uani 1 1 d . . .
Cl4 Cl 0.97926(4) 0.91220(5) 0.51884(15) 0.0407(2) Uani 1 1 d . . .
N2 N 0.90265(12) 0.79855(12) 0.1562(4) 0.0235(6) Uani 1 1 d . . .
Si3 Si 0.92618(5) 0.74236(4) 0.23461(14) 0.02561(19) Uani 1 1 d . . .
Si4 Si 0.82442(4) 0.77235(4) 0.05524(14) 0.02444(19) Uani 1 1 d . . .
C7 C 0.98420(17) 0.77226(17) 0.4527(6) 0.0377(8) Uani 1 1 d . . .
H7A H 1.0227 0.8129 0.4137 0.057 Uiso 1 1 calc R . .
H7B H 0.9967 0.7401 0.4869 0.057 Uiso 1 1 calc R . .
H7C H 0.9638 0.7796 0.5724 0.057 Uiso 1 1 calc R . .
C8 C 0.9627(2) 0.72132(18) 0.0163(6) 0.0424(10) Uani 1 1 d . . .
H8A H 0.9305 0.7008 -0.0930 0.064 Uiso 1 1 calc R . .
H8B H 0.9768 0.6914 0.0640 0.064 Uiso 1 1 calc R . .
H8C H 1.0000 0.7607 -0.0368 0.064 Uiso 1 1 calc R . .
C9 C 0.85426(18) 0.66543(16) 0.3259(6) 0.0370(8) Uani 1 1 d . . .
H9A H 0.8356 0.6744 0.4468 0.055 Uiso 1 1 calc R . .
H9B H 0.8678 0.6342 0.3624 0.055 Uiso 1 1 calc R . .
H9C H 0.8219 0.6475 0.2162 0.055 Uiso 1 1 calc R . .
C10 C 0.80388(19) 0.70920(18) -0.1433(6) 0.0405(9) Uani 1 1 d . . .
H10A H 0.8344 0.7274 -0.2578 0.061 Uiso 1 1 calc R . .
H10B H 0.7599 0.6940 -0.1936 0.061 Uiso 1 1 calc R . .
H10C H 0.8064 0.6729 -0.0832 0.061 Uiso 1 1 calc R . .
C11 C 0.76400(16) 0.74422(19) 0.2663(6) 0.0397(9) Uani 1 1 d . . .
H11A H 0.7590 0.7042 0.3248 0.059 Uiso 1 1 calc R . .
H11B H 0.7224 0.7362 0.2120 0.059 Uiso 1 1 calc R . .
H11C H 0.7787 0.7775 0.3734 0.059 Uiso 1 1 calc R . .
C12 C 0.82197(17) 0.84063(17) -0.0769(6) 0.0372(8) Uani 1 1 d . . .
H12A H 0.8301 0.8745 0.0235 0.056 Uiso 1 1 calc R . .
H12B H 0.7793 0.8248 -0.1392 0.056 Uiso 1 1 calc R . .
H12C H 0.8552 0.8584 -0.1841 0.056 Uiso 1 1 calc R . .
Sb3 Sb 0.268165(12) 0.559918(10) 0.10802(4) 0.03234(7) Uani 1 1 d . . .
Cl5 Cl 0.17014(5) 0.55941(5) 0.17291(16) 0.0476(2) Uani 1 1 d . . .
Cl6 Cl 0.27068(4) 0.58115(4) -0.25205(15) 0.0401(2) Uani 1 1 d . . .
N3 N 0.23286(11) 0.46409(12) 0.0979(4) 0.0237(6) Uani 1 1 d . . .
Si5 Si 0.28690(5) 0.44054(5) 0.19710(14) 0.0266(2) Uani 1 1 d . . .
Si6 Si 0.15530(4) 0.40673(4) 0.00718(14) 0.02656(19) Uani 1 1 d . . .
C13 C 0.35372(17) 0.50932(18) 0.3420(6) 0.0440(9) Uani 1 1 d . . .
H13A H 0.3796 0.5448 0.2468 0.066 Uiso 1 1 calc R . .
H13B H 0.3812 0.4947 0.4068 0.066 Uiso 1 1 calc R . .
H13C H 0.3352 0.5244 0.4480 0.066 Uiso 1 1 calc R . .
C14 C 0.32380(19) 0.4177(2) -0.0151(6) 0.0443(10) Uani 1 1 d . . .
H14A H 0.2900 0.3797 -0.0868 0.066 Uiso 1 1 calc R . .
H14B H 0.3557 0.4076 0.0417 0.066 Uiso 1 1 calc R . .
H14C H 0.3451 0.4538 -0.1120 0.066 Uiso 1 1 calc R . .
C15 C 0.2452(2) 0.37387(19) 0.3861(6) 0.0467(10) Uani 1 1 d . . .
H15A H 0.2271 0.3878 0.4968 0.070 Uiso 1 1 calc R . .
H15B H 0.2762 0.3627 0.4439 0.070 Uiso 1 1 calc R . .
H15C H 0.2103 0.3360 0.3173 0.070 Uiso 1 1 calc R . .
C16 C 0.13015(17) 0.43732(18) -0.2188(6) 0.0411(9) Uani 1 1 d . . .
H16A H 0.1261 0.4746 -0.1770 0.062 Uiso 1 1 calc R . .
H16B H 0.0884 0.4030 -0.2703 0.062 Uiso 1 1 calc R . .
H16C H 0.1627 0.4504 -0.3275 0.062 Uiso 1 1 calc R . .
C17 C 0.15400(17) 0.33141(16) -0.0831(6) 0.0397(9) Uani 1 1 d . . .
H17A H 0.1872 0.3427 -0.1886 0.059 Uiso 1 1 calc R . .
H17B H 0.1114 0.3015 -0.1410 0.059 Uiso 1 1 calc R . .
H17C H 0.1627 0.3108 0.0333 0.059 Uiso 1 1 calc R . .
C18 C 0.09509(17) 0.38311(19) 0.2174(6) 0.0423(10) Uani 1 1 d . . .
H18A H 0.1069 0.3639 0.3303 0.063 Uiso 1 1 calc R . .
H18B H 0.0522 0.3516 0.1655 0.063 Uiso 1 1 calc R . .
H18C H 0.0944 0.4214 0.2675 0.063 Uiso 1 1 calc R . .
 
loop_
 _atom_site_aniso_label
 _atom_site_aniso_U_11
 _atom_site_aniso_U_22
 _atom_site_aniso_U_33
 _atom_site_aniso_U_23
 _atom_site_aniso_U_13
 _atom_site_aniso_U_12
Sb1 0.02427(12) 0.02074(11) 0.03896(16) -0.00071(9) -0.00659(10) 0.01108(9)
Cl1 0.0391(5) 0.0392(5) 0.0416(6) 0.0153(4) 0.0082(4) 0.0215(4)
Cl2 0.0396(5) 0.0391(5) 0.0494(6) -0.0042(4) 0.0024(4) 0.0257(4)
N1 0.0234(13) 0.0211(13) 0.0252(14) -0.0012(11) -0.0031(10) 0.0107(11)
Si1 0.0300(5) 0.0257(5) 0.0274(5) 0.0014(4) -0.0030(4) 0.0166(4)
Si2 0.0217(4) 0.0287(5) 0.0241(5) -0.0038(4) -0.0001(3) 0.0085(4)
C1 0.052(3) 0.066(3) 0.053(3) -0.016(2) -0.004(2) 0.042(2)
C2 0.042(2) 0.045(2) 0.053(3) -0.0029(18) -0.0202(18) 0.0248(18)
C3 0.064(3) 0.056(3) 0.059(3) 0.028(2) 0.003(2) 0.032(2)
C4 0.036(2) 0.0288(18) 0.044(2) -0.0095(16) 0.0039(16) 0.0082(16)
C5 0.0276(18) 0.052(2) 0.035(2) -0.0046(17) -0.0117(15) 0.0150(17)
C6 0.0301(19) 0.041(2) 0.040(2) -0.0039(17) 0.0063(16) 0.0109(17)
Sb2 0.02247(10) 0.02113(11) 0.04081(14) 0.00130(10) -0.00626(10) 0.00908(9)
Cl3 0.0267(4) 0.0424(5) 0.0487(6) 0.0044(4) 0.0061(4) 0.0140(4)
Cl4 0.0355(5) 0.0409(5) 0.0446(6) -0.0150(4) -0.0066(4) 0.0183(4)
N2 0.0232(13) 0.0187(13) 0.0258(15) -0.0008(10) -0.0026(11) 0.0083(11)
Si3 0.0305(5) 0.0267(5) 0.0247(5) 0.0031(4) 0.0018(4) 0.0181(4)
Si4 0.0211(4) 0.0262(5) 0.0232(5) -0.0007(4) -0.0032(3) 0.0098(4)
C7 0.041(2) 0.039(2) 0.039(2) 0.0086(16) -0.0021(17) 0.0238(17)
C8 0.054(2) 0.046(2) 0.041(2) 0.0029(18) 0.0100(19) 0.035(2)
C9 0.049(2) 0.0268(17) 0.037(2) 0.0034(15) 0.0056(16) 0.0205(17)
C10 0.043(2) 0.038(2) 0.033(2) -0.0070(16) -0.0051(16) 0.0140(18)
C11 0.0302(19) 0.050(2) 0.035(2) -0.0014(17) 0.0025(16) 0.0173(18)
C12 0.0319(19) 0.039(2) 0.041(2) 0.0035(16) -0.0103(16) 0.0179(16)
Sb3 0.03363(15) 0.02092(11) 0.04338(16) -0.00366(10) -0.01126(10) 0.01432(10)
Cl5 0.0566(6) 0.0479(6) 0.0550(6) 0.0031(5) 0.0131(5) 0.0385(5)
Cl6 0.0372(5) 0.0334(5) 0.0493(6) 0.0132(4) 0.0095(4) 0.0175(4)
N3 0.0232(13) 0.0197(13) 0.0291(15) -0.0002(10) -0.0037(11) 0.0115(11)
Si5 0.0320(5) 0.0320(5) 0.0236(5) 0.0017(4) 0.0001(4) 0.0218(4)
Si6 0.0230(4) 0.0252(5) 0.0259(5) 0.0000(4) -0.0001(3) 0.0079(4)
C13 0.038(2) 0.051(2) 0.050(2) -0.0068(19) -0.0167(17) 0.0273(19)
C14 0.051(2) 0.062(3) 0.039(2) -0.0018(19) 0.0031(18) 0.043(2)
C15 0.066(3) 0.048(2) 0.036(2) 0.0140(18) 0.0017(19) 0.035(2)
C16 0.0294(18) 0.046(2) 0.039(2) 0.0022(17) -0.0090(16) 0.0123(17)
C17 0.044(2) 0.0233(17) 0.041(2) -0.0050(15) -0.0007(17) 0.0089(16)
C18 0.0308(19) 0.044(2) 0.041(2) 0.0023(17) 0.0069(16) 0.0101(17)

#==============================================================================

# MOLECULAR GEOMETRY 
 
_geom_special_details
;
 All s.u.'s (except the s.u. in the dihedral angle between two l.s. planes)
 are estimated using the full covariance matrix.  The cell s.u.'s are taken
 into account individually in the estimation of s.u.'s in distances, angles
 and torsion angles; correlations between s.u.'s in cell parameters are only
 used when they are defined by crystal symmetry.  An approximate (isotropic)
 treatment of cell s.u.'s is used for estimating s.u.'s involving l.s. planes.
;
 
loop_
 _geom_bond_atom_site_label_1
 _geom_bond_atom_site_label_2
 _geom_bond_distance
 _geom_bond_site_symmetry_2
 _geom_bond_publ_flag
Sb1 N1 2.002(2) . ?
Sb1 Cl2 2.3822(9) . ?
Sb1 Cl1 2.3942(10) . ?
N1 Si1 1.767(3) . ?
N1 Si2 1.776(3) . ?
Si1 C1 1.854(4) . ?
Si1 C3 1.861(4) . ?
Si1 C2 1.870(4) . ?
Si2 C5 1.858(4) . ?
Si2 C6 1.867(3) . ?
Si2 C4 1.875(3) . ?
C1 H1A 0.9800 . ?
C1 H1B 0.9800 . ?
C1 H1C 0.9800 . ?
C2 H2A 0.9800 . ?
C2 H2B 0.9800 . ?
C2 H2C 0.9800 . ?
C3 H3A 0.9800 . ?
C3 H3B 0.9800 . ?
C3 H3C 0.9800 . ?
C4 H4A 0.9800 . ?
C4 H4B 0.9800 . ?
C4 H4C 0.9800 . ?
C5 H5A 0.9800 . ?
C5 H5B 0.9800 . ?
C5 H5C 0.9800 . ?
C6 H6A 0.9800 . ?
C6 H6B 0.9800 . ?
C6 H6C 0.9800 . ?
Sb2 N2 2.003(2) . ?
Sb2 Cl3 2.3767(9) . ?
Sb2 Cl4 2.3948(10) . ?
N2 Si3 1.770(3) . ?
N2 Si4 1.774(3) . ?
Si3 C7 1.859(4) . ?
Si3 C8 1.863(4) . ?
Si3 C9 1.878(3) . ?
Si4 C10 1.856(4) . ?
Si4 C11 1.858(3) . ?
Si4 C12 1.871(3) . ?
C7 H7A 0.9800 . ?
C7 H7B 0.9800 . ?
C7 H7C 0.9800 . ?
C8 H8A 0.9800 . ?
C8 H8B 0.9800 . ?
C8 H8C 0.9800 . ?
C9 H9A 0.9800 . ?
C9 H9B 0.9800 . ?
C9 H9C 0.9800 . ?
C10 H10A 0.9800 . ?
C10 H10B 0.9800 . ?
C10 H10C 0.9800 . ?
C11 H11A 0.9800 . ?
C11 H11B 0.9800 . ?
C11 H11C 0.9800 . ?
C12 H12A 0.9800 . ?
C12 H12B 0.9800 . ?
C12 H12C 0.9800 . ?
Sb3 N3 2.007(3) . ?
Sb3 Cl5 2.3738(10) . ?
Sb3 Cl6 2.3917(10) . ?
N3 Si6 1.767(3) . ?
N3 Si5 1.768(2) . ?
Si5 C15 1.859(4) . ?
Si5 C14 1.860(4) . ?
Si5 C13 1.875(4) . ?
Si6 C18 1.857(4) . ?
Si6 C16 1.870(4) . ?
Si6 C17 1.878(3) . ?
C13 H13A 0.9800 . ?
C13 H13B 0.9800 . ?
C13 H13C 0.9800 . ?
C14 H14A 0.9800 . ?
C14 H14B 0.9800 . ?
C14 H14C 0.9800 . ?
C15 H15A 0.9800 . ?
C15 H15B 0.9800 . ?
C15 H15C 0.9800 . ?
C16 H16A 0.9800 . ?
C16 H16B 0.9800 . ?
C16 H16C 0.9800 . ?
C17 H17A 0.9800 . ?
C17 H17B 0.9800 . ?
C17 H17C 0.9800 . ?
C18 H18A 0.9800 . ?
C18 H18B 0.9800 . ?
C18 H18C 0.9800 . ?
 
loop_
 _geom_angle_atom_site_label_1
 _geom_angle_atom_site_label_2
 _geom_angle_atom_site_label_3
 _geom_angle
 _geom_angle_site_symmetry_1
 _geom_angle_site_symmetry_3
 _geom_angle_publ_flag
N1 Sb1 Cl2 98.40(7) . . ?
N1 Sb1 Cl1 99.37(8) . . ?
Cl2 Sb1 Cl1 95.22(3) . . ?
Si1 N1 Si2 121.37(14) . . ?
Si1 N1 Sb1 113.59(13) . . ?
Si2 N1 Sb1 124.91(14) . . ?
N1 Si1 C1 110.45(16) . . ?
N1 Si1 C3 110.97(16) . . ?
C1 Si1 C3 110.9(2) . . ?
N1 Si1 C2 110.68(14) . . ?
C1 Si1 C2 107.06(19) . . ?
C3 Si1 C2 106.6(2) . . ?
N1 Si2 C5 112.76(15) . . ?
N1 Si2 C6 109.68(15) . . ?
C5 Si2 C6 109.26(18) . . ?
N1 Si2 C4 110.29(15) . . ?
C5 Si2 C4 106.21(18) . . ?
C6 Si2 C4 108.51(16) . . ?
Si1 C1 H1A 109.5 . . ?
Si1 C1 H1B 109.5 . . ?
H1A C1 H1B 109.5 . . ?
Si1 C1 H1C 109.5 . . ?
H1A C1 H1C 109.5 . . ?
H1B C1 H1C 109.5 . . ?
Si1 C2 H2A 109.5 . . ?
Si1 C2 H2B 109.5 . . ?
H2A C2 H2B 109.5 . . ?
Si1 C2 H2C 109.5 . . ?
H2A C2 H2C 109.5 . . ?
H2B C2 H2C 109.5 . . ?
Si1 C3 H3A 109.5 . . ?
Si1 C3 H3B 109.5 . . ?
H3A C3 H3B 109.5 . . ?
Si1 C3 H3C 109.5 . . ?
H3A C3 H3C 109.5 . . ?
H3B C3 H3C 109.5 . . ?
Si2 C4 H4A 109.5 . . ?
Si2 C4 H4B 109.5 . . ?
H4A C4 H4B 109.5 . . ?
Si2 C4 H4C 109.5 . . ?
H4A C4 H4C 109.5 . . ?
H4B C4 H4C 109.5 . . ?
Si2 C5 H5A 109.5 . . ?
Si2 C5 H5B 109.5 . . ?
H5A C5 H5B 109.5 . . ?
Si2 C5 H5C 109.5 . . ?
H5A C5 H5C 109.5 . . ?
H5B C5 H5C 109.5 . . ?
Si2 C6 H6A 109.5 . . ?
Si2 C6 H6B 109.5 . . ?
H6A C6 H6B 109.5 . . ?
Si2 C6 H6C 109.5 . . ?
H6A C6 H6C 109.5 . . ?
H6B C6 H6C 109.5 . . ?
N2 Sb2 Cl3 98.14(7) . . ?
N2 Sb2 Cl4 99.45(8) . . ?
Cl3 Sb2 Cl4 95.27(3) . . ?
Si3 N2 Si4 121.15(14) . . ?
Si3 N2 Sb2 125.51(13) . . ?
Si4 N2 Sb2 113.28(13) . . ?
N2 Si3 C7 112.78(14) . . ?
N2 Si3 C8 110.73(15) . . ?
C7 Si3 C8 109.02(18) . . ?
N2 Si3 C9 110.58(15) . . ?
C7 Si3 C9 106.04(17) . . ?
C8 Si3 C9 107.45(17) . . ?
N2 Si4 C10 110.38(16) . . ?
N2 Si4 C11 110.18(15) . . ?
C10 Si4 C11 112.24(18) . . ?
N2 Si4 C12 110.45(14) . . ?
C10 Si4 C12 106.15(17) . . ?
C11 Si4 C12 107.32(18) . . ?
Si3 C7 H7A 109.5 . . ?
Si3 C7 H7B 109.5 . . ?
H7A C7 H7B 109.5 . . ?
Si3 C7 H7C 109.5 . . ?
H7A C7 H7C 109.5 . . ?
H7B C7 H7C 109.5 . . ?
Si3 C8 H8A 109.5 . . ?
Si3 C8 H8B 109.5 . . ?
H8A C8 H8B 109.5 . . ?
Si3 C8 H8C 109.5 . . ?
H8A C8 H8C 109.5 . . ?
H8B C8 H8C 109.5 . . ?
Si3 C9 H9A 109.5 . . ?
Si3 C9 H9B 109.5 . . ?
H9A C9 H9B 109.5 . . ?
Si3 C9 H9C 109.5 . . ?
H9A C9 H9C 109.5 . . ?
H9B C9 H9C 109.5 . . ?
Si4 C10 H10A 109.5 . . ?
Si4 C10 H10B 109.5 . . ?
H10A C10 H10B 109.5 . . ?
Si4 C10 H10C 109.5 . . ?
H10A C10 H10C 109.5 . . ?
H10B C10 H10C 109.5 . . ?
Si4 C11 H11A 109.5 . . ?
Si4 C11 H11B 109.5 . . ?
H11A C11 H11B 109.5 . . ?
Si4 C11 H11C 109.5 . . ?
H11A C11 H11C 109.5 . . ?
H11B C11 H11C 109.5 . . ?
Si4 C12 H12A 109.5 . . ?
Si4 C12 H12B 109.5 . . ?
H12A C12 H12B 109.5 . . ?
Si4 C12 H12C 109.5 . . ?
H12A C12 H12C 109.5 . . ?
H12B C12 H12C 109.5 . . ?
N3 Sb3 Cl5 98.58(7) . . ?
N3 Sb3 Cl6 99.30(7) . . ?
Cl5 Sb3 Cl6 95.48(3) . . ?
Si6 N3 Si5 121.65(15) . . ?
Si6 N3 Sb3 125.13(13) . . ?
Si5 N3 Sb3 113.20(13) . . ?
N3 Si5 C15 110.49(16) . . ?
N3 Si5 C14 110.53(15) . . ?
C15 Si5 C14 111.70(18) . . ?
N3 Si5 C13 109.99(14) . . ?
C15 Si5 C13 105.96(19) . . ?
C14 Si5 C13 108.03(19) . . ?
N3 Si6 C18 110.01(15) . . ?
N3 Si6 C16 112.16(14) . . ?
C18 Si6 C16 110.28(18) . . ?
N3 Si6 C17 110.86(14) . . ?
C18 Si6 C17 107.46(17) . . ?
C16 Si6 C17 105.90(17) . . ?
Si5 C13 H13A 109.5 . . ?
Si5 C13 H13B 109.5 . . ?
H13A C13 H13B 109.5 . . ?
Si5 C13 H13C 109.5 . . ?
H13A C13 H13C 109.5 . . ?
H13B C13 H13C 109.5 . . ?
Si5 C14 H14A 109.5 . . ?
Si5 C14 H14B 109.5 . . ?
H14A C14 H14B 109.5 . . ?
Si5 C14 H14C 109.5 . . ?
H14A C14 H14C 109.5 . . ?
H14B C14 H14C 109.5 . . ?
Si5 C15 H15A 109.5 . . ?
Si5 C15 H15B 109.5 . . ?
H15A C15 H15B 109.5 . . ?
Si5 C15 H15C 109.5 . . ?
H15A C15 H15C 109.5 . . ?
H15B C15 H15C 109.5 . . ?
Si6 C16 H16A 109.5 . . ?
Si6 C16 H16B 109.5 . . ?
H16A C16 H16B 109.5 . . ?
Si6 C16 H16C 109.5 . . ?
H16A C16 H16C 109.5 . . ?
H16B C16 H16C 109.5 . . ?
Si6 C17 H17A 109.5 . . ?
Si6 C17 H17B 109.5 . . ?
H17A C17 H17B 109.5 . . ?
Si6 C17 H17C 109.5 . . ?
H17A C17 H17C 109.5 . . ?
H17B C17 H17C 109.5 . . ?
Si6 C18 H18A 109.5 . . ?
Si6 C18 H18B 109.5 . . ?
H18A C18 H18B 109.5 . . ?
Si6 C18 H18C 109.5 . . ?
H18A C18 H18C 109.5 . . ?
H18B C18 H18C 109.5 . . ?
 
loop_
 _geom_torsion_atom_site_label_1
 _geom_torsion_atom_site_label_2
 _geom_torsion_atom_site_label_3
 _geom_torsion_atom_site_label_4
 _geom_torsion
 _geom_torsion_site_symmetry_1
 _geom_torsion_site_symmetry_2
 _geom_torsion_site_symmetry_3
 _geom_torsion_site_symmetry_4
 _geom_torsion_publ_flag
Cl2 Sb1 N1 Si1 -142.54(12) . . . . ?
Cl1 Sb1 N1 Si1 120.70(12) . . . . ?
Cl2 Sb1 N1 Si2 33.22(16) . . . . ?
Cl1 Sb1 N1 Si2 -63.53(16) . . . . ?
Si2 N1 Si1 C1 79.2(2) . . . . ?
Sb1 N1 Si1 C1 -104.83(19) . . . . ?
Si2 N1 Si1 C3 -44.2(2) . . . . ?
Sb1 N1 Si1 C3 131.71(19) . . . . ?
Si2 N1 Si1 C2 -162.38(19) . . . . ?
Sb1 N1 Si1 C2 13.6(2) . . . . ?
Si1 N1 Si2 C5 -150.44(18) . . . . ?
Sb1 N1 Si2 C5 34.1(2) . . . . ?
Si1 N1 Si2 C6 87.6(2) . . . . ?
Sb1 N1 Si2 C6 -87.9(2) . . . . ?
Si1 N1 Si2 C4 -31.9(2) . . . . ?
Sb1 N1 Si2 C4 152.66(17) . . . . ?
Cl3 Sb2 N2 Si3 33.25(17) . . . . ?
Cl4 Sb2 N2 Si3 -63.52(16) . . . . ?
Cl3 Sb2 N2 Si4 -144.00(12) . . . . ?
Cl4 Sb2 N2 Si4 119.24(12) . . . . ?
Si4 N2 Si3 C7 -148.07(17) . . . . ?
Sb2 N2 Si3 C7 34.9(2) . . . . ?
Si4 N2 Si3 C8 89.5(2) . . . . ?
Sb2 N2 Si3 C8 -87.6(2) . . . . ?
Si4 N2 Si3 C9 -29.5(2) . . . . ?
Sb2 N2 Si3 C9 153.43(17) . . . . ?
Si3 N2 Si4 C10 -47.6(2) . . . . ?
Sb2 N2 Si4 C10 129.75(16) . . . . ?
Si3 N2 Si4 C11 76.9(2) . . . . ?
Sb2 N2 Si4 C11 -105.72(18) . . . . ?
Si3 N2 Si4 C12 -164.70(18) . . . . ?
Sb2 N2 Si4 C12 12.7(2) . . . . ?
Cl5 Sb3 N3 Si6 32.78(17) . . . . ?
Cl6 Sb3 N3 Si6 -64.26(16) . . . . ?
Cl5 Sb3 N3 Si5 -145.63(12) . . . . ?
Cl6 Sb3 N3 Si5 117.33(12) . . . . ?
Si6 N3 Si5 C15 -48.1(2) . . . . ?
Sb3 N3 Si5 C15 130.35(17) . . . . ?
Si6 N3 Si5 C14 76.0(2) . . . . ?
Sb3 N3 Si5 C14 -105.50(18) . . . . ?
Si6 N3 Si5 C13 -164.77(18) . . . . ?
Sb3 N3 Si5 C13 13.7(2) . . . . ?
Si5 N3 Si6 C18 92.3(2) . . . . ?
Sb3 N3 Si6 C18 -85.9(2) . . . . ?
Si5 N3 Si6 C16 -144.51(18) . . . . ?
Sb3 N3 Si6 C16 37.2(2) . . . . ?
Si5 N3 Si6 C17 -26.4(2) . . . . ?
Sb3 N3 Si6 C17 155.35(17) . . . . ?
 
_diffrn_measured_fraction_theta_max    0.999
_diffrn_reflns_theta_full              32.02
_diffrn_measured_fraction_theta_full   0.999
_refine_diff_density_max    0.598
_refine_diff_density_min   -0.631
_refine_diff_density_rms    0.082


#=============================================================================

data_av_ml80_ternsime3_sbcl2_benzene

 
_audit_author_name                'Villinger, A.' 
_audit_creation_method            SHELXL-97 

#==============================================================================

# CHEMICAL DATA

_chemical_name_systematic
;
 ?
;
_chemical_name_common             ?
_chemical_melting_point           ?
_chemical_formula_moiety          'C27 H34 Cl2 N Sb Si , 0.5(C6 H6)'
_chemical_formula_sum
 'C30 H37 Cl2 N Sb Si'
_chemical_formula_weight          632.35
 
loop_
 _atom_type_symbol
 _atom_type_description
 _atom_type_scat_dispersion_real
 _atom_type_scat_dispersion_imag
 _atom_type_scat_source
 'C'  'C'   0.0033   0.0016
 'International Tables Vol C Tables 4.2.6.8 and 6.1.1.4'
 'H'  'H'   0.0000   0.0000
 'International Tables Vol C Tables 4.2.6.8 and 6.1.1.4'
 'N'  'N'   0.0061   0.0033
 'International Tables Vol C Tables 4.2.6.8 and 6.1.1.4'
 'Si'  'Si'   0.0817   0.0704
 'International Tables Vol C Tables 4.2.6.8 and 6.1.1.4'
 'Cl'  'Cl'   0.1484   0.1585
 'International Tables Vol C Tables 4.2.6.8 and 6.1.1.4'
 'Sb'  'Sb'  -0.5866   1.5461
 'International Tables Vol C Tables 4.2.6.8 and 6.1.1.4'
 
#==============================================================================

# CRYSTAL DATA
 
_symmetry_cell_setting            triclinic
_symmetry_space_group_name_H-M    'P -1'
_symmetry_space_group_name_Hall   '-P 1'
_symmetry_Int_Tables_number       2
 
loop_
 _symmetry_equiv_pos_as_xyz
 'x, y, z'
 '-x, -y, -z'
 
_cell_length_a                    16.953(12)
_cell_length_b                    19.071(13)
_cell_length_c                    19.490(13)
_cell_angle_alpha                 90.888(19)
_cell_angle_beta                  103.057(17)
_cell_angle_gamma                 97.44(2)
_cell_volume                      6080(7)
_cell_formula_units_Z             8
_cell_measurement_temperature     173(2)
_cell_measurement_reflns_used     9908
_cell_measurement_theta_min       7.355 
_cell_measurement_theta_max       57.259
 
_exptl_crystal_description        block
_exptl_crystal_colour             colourless
_exptl_crystal_size_max           0.38
_exptl_crystal_size_mid           0.20
_exptl_crystal_size_min           0.08
_exptl_crystal_density_meas       ?
_exptl_crystal_density_diffrn     1.382
_exptl_crystal_density_method     'not measured'
_exptl_crystal_F_000              2584
_exptl_absorpt_coefficient_mu     1.141
_exptl_absorpt_correction_type    multi-scan
_exptl_absorpt_correction_T_min   0.6709
_exptl_absorpt_correction_T_max   0.9142
_exptl_absorpt_process_details    '(SADABS; Sheldrick, 2004)'

#==============================================================================

# EXPERIMENTAL DATA
 
_exptl_special_details
;
 ?
;
 
_diffrn_ambient_temperature       173(2)
_diffrn_radiation_wavelength      0.71073
_diffrn_radiation_type            MoK\a
_diffrn_radiation_source          'sealed tube'
_diffrn_radiation_monochromator   graphite
_diffrn_measurement_device_type   'Bruker Apex Kappa II-CCD-diffractometer'
_diffrn_measurement_method        'phi and psi scans'
_diffrn_detector_area_resol_mean  ?
_diffrn_standards_number          ?
_diffrn_standards_interval_count  ?
_diffrn_standards_interval_time   ?
_diffrn_standards_decay_%         ?
_diffrn_reflns_number             139552
_diffrn_reflns_av_R_equivalents   0.0551
_diffrn_reflns_av_sigmaI/netI     0.0660
_diffrn_reflns_limit_h_min        -22
_diffrn_reflns_limit_h_max        23
_diffrn_reflns_limit_k_min        -26
_diffrn_reflns_limit_k_max        25
_diffrn_reflns_limit_l_min        -26
_diffrn_reflns_limit_l_max        26
_diffrn_reflns_theta_min          1.53
_diffrn_reflns_theta_max          29.14
_reflns_number_total              31796
_reflns_number_gt                 19481
_reflns_threshold_expression      >2\s(I)
 
_computing_data_collection        'Bruker Apex v2.0-2'
_computing_cell_refinement        'Bruker Apex v2.0-2'
_computing_data_reduction         'Bruker SAINT'
_computing_structure_solution     'SHELXS-97 (Sheldrick, 1997)'
_computing_structure_refinement   'SHELXL-97 (Sheldrick, 1997)'
_computing_molecular_graphics     'ORTEP-3 (Farrugia, 1997)' 
_computing_publication_material   'SHELXL-97'

#==============================================================================

# REFINEMENT DATA 

_refine_special_details
;
 All H atoms were positioned geometrically and refined using a 
 riding model , with C---H = 0.98 (methyl groups), 0.99\%A (methylene groups), 
 1.00\%A (methine groups) or 0.95 \%A (aryl CH) and with <i>U</i>~iso~(H) = 
 1.5 times <i>U</i>~eq~(C) (methyl groups) or with <i>U</i>~iso~(H) = 1.2 times 
 <i>U</i>~eq~(C) (methylene  groups, aryl CH, methine groups). Torsion angles 
 of all methyl groups were allowed to refine. All C atoms in both disordered 
 benzene molecules were refined isotropically.
 
 Refinement of F^2^ against ALL reflections.  The weighted R-factor wR and
 goodness of fit S are based on F^2^, conventional R-factors R are based
 on F, with F set to zero for negative F^2^. The threshold expression of
 F^2^ > 2\s(F^2^) is used only for calculating R-factors(gt) etc. and is
 not relevant to the choice of reflections for refinement.  R-factors based
 on F^2^ are statistically about twice as large as those based on F, and R-
 factors based on ALL data will be even larger.
;
 
_refine_ls_structure_factor_coef  Fsqd
_refine_ls_matrix_type            full
_refine_ls_weighting_scheme       calc
_refine_ls_weighting_details
 'calc w=1/[\s^2^(Fo^2^)+(0.0361P)^2^+12.4619P] where P=(Fo^2^+2Fc^2^)/3'
_atom_sites_solution_primary      direct
_atom_sites_solution_secondary    difmap
_atom_sites_solution_hydrogens    geom
_refine_ls_hydrogen_treatment     constr
_refine_ls_extinction_method      none
_refine_ls_extinction_coef        ?
_refine_ls_number_reflns          31796
_refine_ls_number_parameters      1226
_refine_ls_number_restraints      0
_refine_ls_R_factor_all           0.0995
_refine_ls_R_factor_gt            0.0431
_refine_ls_wR_factor_ref          0.1256
_refine_ls_wR_factor_gt           0.0922
_refine_ls_goodness_of_fit_ref    1.108
_refine_ls_restrained_S_all       1.108
_refine_ls_shift/su_max           0.001
_refine_ls_shift/su_mean          0.000

#==============================================================================

# ATOMIC COORDINATES AND DISPLACEMENT PARAMETERS
 
loop_
 _atom_site_label
 _atom_site_type_symbol
 _atom_site_fract_x
 _atom_site_fract_y
 _atom_site_fract_z
 _atom_site_U_iso_or_equiv
 _atom_site_adp_type
 _atom_site_occupancy
 _atom_site_symmetry_multiplicity
 _atom_site_calc_flag
 _atom_site_refinement_flags
 _atom_site_disorder_assembly
 _atom_site_disorder_group
Sb1 Sb 0.837293(17) 0.669196(16) 0.456105(14) 0.02678(7) Uani 1 1 d . . .
Cl1 Cl 0.82508(8) 0.79020(6) 0.44048(7) 0.0423(3) Uani 1 1 d . . .
Cl2 Cl 0.75718(7) 0.66627(7) 0.54301(6) 0.0391(3) Uani 1 1 d . . .
Si1 Si 0.64314(7) 0.62192(7) 0.35937(7) 0.0317(3) Uani 1 1 d . . .
N1 N 0.7496(2) 0.61487(18) 0.37794(17) 0.0253(7) Uani 1 1 d . . .
C1 C 0.7859(2) 0.5696(2) 0.3368(2) 0.0268(9) Uani 1 1 d . . .
C2 C 0.7611(2) 0.4958(2) 0.3283(2) 0.0280(9) Uani 1 1 d . . .
C3 C 0.7945(3) 0.4556(3) 0.2841(2) 0.0338(10) Uani 1 1 d . . .
H3 H 0.7765 0.4062 0.2775 0.041 Uiso 1 1 calc R . .
C4 C 0.8521(3) 0.4852(3) 0.2500(3) 0.0400(11) Uani 1 1 d . . .
H4 H 0.8719 0.4572 0.2185 0.048 Uiso 1 1 calc R . .
C5 C 0.8808(3) 0.5563(3) 0.2623(2) 0.0335(10) Uani 1 1 d . . .
H5 H 0.9233 0.5765 0.2412 0.040 Uiso 1 1 calc R . .
C6 C 0.8494(2) 0.5995(2) 0.3050(2) 0.0264(9) Uani 1 1 d . . .
C7 C 0.7039(3) 0.4532(2) 0.3659(2) 0.0291(9) Uani 1 1 d . . .
C8 C 0.6340(3) 0.4105(2) 0.3252(3) 0.0344(10) Uani 1 1 d . . .
C9 C 0.5875(3) 0.3649(3) 0.3599(3) 0.0405(11) Uani 1 1 d . . .
H9 H 0.5407 0.3361 0.3326 0.049 Uiso 1 1 calc R . .
C10 C 0.6056(3) 0.3591(3) 0.4323(3) 0.0444(12) Uani 1 1 d . . .
C11 C 0.6753(3) 0.4008(3) 0.4708(3) 0.0385(11) Uani 1 1 d . . .
H11 H 0.6894 0.3977 0.5206 0.046 Uiso 1 1 calc R . .
C12 C 0.7252(3) 0.4468(2) 0.4391(2) 0.0331(10) Uani 1 1 d . . .
C13 C 0.8876(2) 0.6749(2) 0.3162(2) 0.0274(9) Uani 1 1 d . . .
C14 C 0.8498(3) 0.7284(3) 0.2779(2) 0.0326(10) Uani 1 1 d . . .
C15 C 0.8902(3) 0.7969(3) 0.2852(2) 0.0356(11) Uani 1 1 d . . .
H15 H 0.8649 0.8325 0.2586 0.043 Uiso 1 1 calc R . .
C16 C 0.9670(3) 0.8153(3) 0.3306(2) 0.0349(10) Uani 1 1 d . . .
C17 C 1.0047(3) 0.7616(3) 0.3668(2) 0.0342(10) Uani 1 1 d . . .
H17 H 1.0574 0.7730 0.3972 0.041 Uiso 1 1 calc R . .
C18 C 0.9669(3) 0.6914(2) 0.3596(2) 0.0290(9) Uani 1 1 d . . .
C19 C 0.6075(3) 0.4110(3) 0.2459(3) 0.0449(12) Uani 1 1 d . . .
H19A H 0.6335 0.4545 0.2294 0.067 Uiso 1 1 calc R . .
H19B H 0.5479 0.4091 0.2319 0.067 Uiso 1 1 calc R . .
H19C H 0.6238 0.3698 0.2248 0.067 Uiso 1 1 calc R . .
C20 C 0.5534(4) 0.3091(3) 0.4685(4) 0.0647(17) Uani 1 1 d . . .
H20A H 0.5147 0.3348 0.4856 0.097 Uiso 1 1 calc R . .
H20B H 0.5884 0.2892 0.5085 0.097 Uiso 1 1 calc R . .
H20C H 0.5233 0.2707 0.4350 0.097 Uiso 1 1 calc R . .
C21 C 0.8027(3) 0.4854(3) 0.4853(2) 0.0374(11) Uani 1 1 d . . .
H21A H 0.7901 0.5268 0.5090 0.056 Uiso 1 1 calc R . .
H21B H 0.8415 0.5008 0.4563 0.056 Uiso 1 1 calc R . .
H21C H 0.8269 0.4537 0.5207 0.056 Uiso 1 1 calc R . .
C22 C 0.7675(3) 0.7122(3) 0.2281(3) 0.0437(12) Uani 1 1 d . . .
H22A H 0.7249 0.7066 0.2550 0.065 Uiso 1 1 calc R . .
H22B H 0.7651 0.6683 0.2005 0.065 Uiso 1 1 calc R . .
H22C H 0.7586 0.7511 0.1962 0.065 Uiso 1 1 calc R . .
C23 C 1.0063(3) 0.8913(3) 0.3399(3) 0.0459(13) Uani 1 1 d . . .
H23A H 1.0053 0.9108 0.2935 0.069 Uiso 1 1 calc R . .
H23B H 1.0630 0.8939 0.3667 0.069 Uiso 1 1 calc R . .
H23C H 0.9761 0.9187 0.3654 0.069 Uiso 1 1 calc R . .
C24 C 1.0136(3) 0.6351(3) 0.3974(3) 0.0353(10) Uani 1 1 d . . .
H24A H 1.0335 0.6078 0.3633 0.053 Uiso 1 1 calc R . .
H24B H 0.9773 0.6033 0.4194 0.053 Uiso 1 1 calc R . .
H24C H 1.0601 0.6577 0.4337 0.053 Uiso 1 1 calc R . .
C25 C 0.5969(3) 0.5942(3) 0.2650(3) 0.0444(12) Uani 1 1 d . . .
H25A H 0.5807 0.6355 0.2389 0.067 Uiso 1 1 calc R . .
H25B H 0.5487 0.5588 0.2621 0.067 Uiso 1 1 calc R . .
H25C H 0.6370 0.5736 0.2446 0.067 Uiso 1 1 calc R . .
C26 C 0.5860(3) 0.5677(3) 0.4163(3) 0.0406(11) Uani 1 1 d . . .
H26A H 0.5844 0.5173 0.4045 0.061 Uiso 1 1 calc R . .
H26B H 0.5301 0.5793 0.4082 0.061 Uiso 1 1 calc R . .
H26C H 0.6136 0.5781 0.4659 0.061 Uiso 1 1 calc R . .
C27 C 0.6300(3) 0.7162(3) 0.3735(3) 0.0478(13) Uani 1 1 d . . .
H27A H 0.6514 0.7308 0.4234 0.072 Uiso 1 1 calc R . .
H27B H 0.5719 0.7213 0.3598 0.072 Uiso 1 1 calc R . .
H27C H 0.6600 0.7461 0.3447 0.072 Uiso 1 1 calc R . .
Sb2 Sb 0.141757(17) 0.711990(16) 0.262596(14) 0.02696(7) Uani 1 1 d . . .
Cl3 Cl 0.17033(8) 0.83614(6) 0.26934(6) 0.0417(3) Uani 1 1 d . . .
Cl4 Cl 0.22374(7) 0.70749(7) 0.37951(6) 0.0416(3) Uani 1 1 d . . .
Si2 Si 0.33082(8) 0.70140(7) 0.23459(7) 0.0347(3) Uani 1 1 d . . .
N2 N 0.2228(2) 0.67908(18) 0.21088(18) 0.0261(7) Uani 1 1 d . . .
C28 C 0.1809(2) 0.6338(2) 0.1504(2) 0.0257(9) Uani 1 1 d . . .
C29 C 0.1215(3) 0.6590(2) 0.0968(2) 0.0305(9) Uani 1 1 d . . .
C30 C 0.0832(3) 0.6161(3) 0.0363(2) 0.0401(11) Uani 1 1 d . . .
H30 H 0.0437 0.6337 0.0005 0.048 Uiso 1 1 calc R . .
C31 C 0.1018(3) 0.5487(3) 0.0279(3) 0.0422(12) Uani 1 1 d . . .
H31 H 0.0776 0.5210 -0.0143 0.051 Uiso 1 1 calc R . .
C32 C 0.1561(3) 0.5221(3) 0.0816(3) 0.0403(11) Uani 1 1 d . . .
H32 H 0.1673 0.4750 0.0765 0.048 Uiso 1 1 calc R . .
C33 C 0.1954(3) 0.5626(2) 0.1436(2) 0.0302(9) Uani 1 1 d . . .
C34 C 0.0927(3) 0.7297(2) 0.1016(2) 0.0291(9) Uani 1 1 d . . .
C35 C 0.1388(3) 0.7920(2) 0.0854(2) 0.0317(10) Uani 1 1 d . . .
C36 C 0.1078(3) 0.8553(3) 0.0862(2) 0.0351(10) Uani 1 1 d . . .
H36 H 0.1389 0.8971 0.0754 0.042 Uiso 1 1 calc R . .
C37 C 0.0327(3) 0.8603(3) 0.1021(2) 0.0379(11) Uani 1 1 d . . .
C38 C -0.0126(3) 0.7989(3) 0.1166(2) 0.0364(11) Uani 1 1 d . . .
H38 H -0.0641 0.8014 0.1274 0.044 Uiso 1 1 calc R . .
C39 C 0.0156(3) 0.7331(3) 0.1156(2) 0.0338(10) Uani 1 1 d . . .
C40 C 0.2480(3) 0.5264(2) 0.2009(2) 0.0304(9) Uani 1 1 d . . .
C41 C 0.2231(3) 0.5131(2) 0.2645(2) 0.0323(10) Uani 1 1 d . . .
C42 C 0.2716(3) 0.4792(2) 0.3172(2) 0.0352(10) Uani 1 1 d . . .
H42 H 0.2546 0.4713 0.3599 0.042 Uiso 1 1 calc R . .
C43 C 0.3436(3) 0.4565(3) 0.3102(3) 0.0407(11) Uani 1 1 d . . .
C44 C 0.3649(3) 0.4665(3) 0.2454(3) 0.0401(11) Uani 1 1 d . . .
H44 H 0.4133 0.4500 0.2386 0.048 Uiso 1 1 calc R . .
C45 C 0.3181(3) 0.4995(2) 0.1906(2) 0.0341(10) Uani 1 1 d . . .
C46 C 0.2196(3) 0.7897(3) 0.0664(3) 0.0436(12) Uani 1 1 d . . .
H46A H 0.2120 0.7575 0.0251 0.065 Uiso 1 1 calc R . .
H46B H 0.2579 0.7729 0.1061 0.065 Uiso 1 1 calc R . .
H46C H 0.2415 0.8373 0.0555 0.065 Uiso 1 1 calc R . .
C47 C -0.0008(3) 0.9302(3) 0.1011(3) 0.0517(14) Uani 1 1 d . . .
H47A H -0.0584 0.9234 0.0759 0.078 Uiso 1 1 calc R . .
H47B H 0.0304 0.9647 0.0772 0.078 Uiso 1 1 calc R . .
H47C H 0.0039 0.9477 0.1496 0.078 Uiso 1 1 calc R . .
C48 C -0.0406(3) 0.6679(3) 0.1274(3) 0.0487(13) Uani 1 1 d . . .
H48A H -0.0809 0.6530 0.0834 0.073 Uiso 1 1 calc R . .
H48B H -0.0689 0.6790 0.1640 0.073 Uiso 1 1 calc R . .
H48C H -0.0083 0.6295 0.1424 0.073 Uiso 1 1 calc R . .
C49 C 0.1438(3) 0.5323(3) 0.2773(3) 0.0382(11) Uani 1 1 d . . .
H49A H 0.1105 0.4897 0.2880 0.057 Uiso 1 1 calc R . .
H49B H 0.1138 0.5528 0.2351 0.057 Uiso 1 1 calc R . .
H49C H 0.1554 0.5669 0.3172 0.057 Uiso 1 1 calc R . .
C50 C 0.3963(3) 0.4215(3) 0.3686(3) 0.0556(16) Uani 1 1 d . . .
H50A H 0.4066 0.4506 0.4124 0.083 Uiso 1 1 calc R . .
H50B H 0.4484 0.4165 0.3565 0.083 Uiso 1 1 calc R . .
H50C H 0.3683 0.3746 0.3751 0.083 Uiso 1 1 calc R . .
C51 C 0.3456(3) 0.5040(3) 0.1221(3) 0.0470(13) Uani 1 1 d . . .
H51A H 0.4051 0.5171 0.1321 0.070 Uiso 1 1 calc R . .
H51B H 0.3190 0.5399 0.0935 0.070 Uiso 1 1 calc R . .
H51C H 0.3307 0.4579 0.0963 0.070 Uiso 1 1 calc R . .
C52 C 0.3821(3) 0.6524(3) 0.3100(3) 0.0452(13) Uani 1 1 d . . .
H52A H 0.3488 0.6477 0.3451 0.068 Uiso 1 1 calc R . .
H52B H 0.4360 0.6785 0.3314 0.068 Uiso 1 1 calc R . .
H52C H 0.3885 0.6053 0.2930 0.068 Uiso 1 1 calc R . .
C53 C 0.3729(3) 0.6855(3) 0.1557(3) 0.0502(14) Uani 1 1 d . . .
H53A H 0.3296 0.6604 0.1181 0.075 Uiso 1 1 calc R . .
H53B H 0.4176 0.6569 0.1686 0.075 Uiso 1 1 calc R . .
H53C H 0.3936 0.7310 0.1391 0.075 Uiso 1 1 calc R . .
C54 C 0.3580(3) 0.7970(3) 0.2617(3) 0.0519(14) Uani 1 1 d . . .
H54A H 0.3312 0.8253 0.2241 0.078 Uiso 1 1 calc R . .
H54B H 0.4174 0.8100 0.2705 0.078 Uiso 1 1 calc R . .
H54C H 0.3398 0.8062 0.3049 0.078 Uiso 1 1 calc R . .
Sb3 Sb 0.861404(16) 0.174802(15) 0.237003(14) 0.02507(7) Uani 1 1 d . . .
Cl5 Cl 0.84047(7) 0.29448(6) 0.23269(6) 0.0357(2) Uani 1 1 d . . .
Cl6 Cl 0.77887(7) 0.15312(7) 0.11966(5) 0.0369(3) Uani 1 1 d . . .
Si3 Si 0.67125(7) 0.13029(7) 0.26578(6) 0.0285(3) Uani 1 1 d . . .
N3 N 0.77864(19) 0.12829(18) 0.28891(17) 0.0234(7) Uani 1 1 d . . .
C55 C 0.8195(2) 0.0925(2) 0.3485(2) 0.0239(8) Uani 1 1 d . . .
C56 C 0.8823(2) 0.1309(2) 0.4015(2) 0.0263(9) Uani 1 1 d . . .
C57 C 0.9205(3) 0.0971(3) 0.4600(2) 0.0370(11) Uani 1 1 d . . .
H57 H 0.9623 0.1235 0.4950 0.044 Uiso 1 1 calc R . .
C58 C 0.8990(3) 0.0266(3) 0.4682(3) 0.0416(12) Uani 1 1 d . . .
H58 H 0.9239 0.0045 0.5094 0.050 Uiso 1 1 calc R . .
C59 C 0.8400(3) -0.0121(3) 0.4152(2) 0.0357(10) Uani 1 1 d . . .
H59 H 0.8261 -0.0614 0.4202 0.043 Uiso 1 1 calc R . .
C60 C 0.8006(3) 0.0190(2) 0.3551(2) 0.0281(9) Uani 1 1 d . . .
C61 C 0.9120(2) 0.2077(2) 0.3972(2) 0.0272(9) Uani 1 1 d . . .
C62 C 0.8673(3) 0.2606(2) 0.4146(2) 0.0287(9) Uani 1 1 d . . .
C63 C 0.8992(3) 0.3309(3) 0.4136(2) 0.0372(11) Uani 1 1 d . . .
H63 H 0.8689 0.3662 0.4249 0.045 Uiso 1 1 calc R . .
C64 C 0.9735(3) 0.3521(3) 0.3968(2) 0.0375(11) Uani 1 1 d . . .
C65 C 1.0178(3) 0.2999(3) 0.3813(2) 0.0387(11) Uani 1 1 d . . .
H65 H 1.0689 0.3134 0.3697 0.046 Uiso 1 1 calc R . .
C66 C 0.9888(3) 0.2284(3) 0.3823(2) 0.0332(10) Uani 1 1 d . . .
C67 C 0.7415(3) -0.0306(2) 0.3008(2) 0.0285(9) Uani 1 1 d . . .
C68 C 0.7607(3) -0.0456(2) 0.2354(2) 0.0309(10) Uani 1 1 d . . .
C69 C 0.7095(3) -0.0955(2) 0.1871(2) 0.0349(10) Uani 1 1 d . . .
H69 H 0.7227 -0.1047 0.1433 0.042 Uiso 1 1 calc R . .
C70 C 0.6395(3) -0.1322(2) 0.2016(3) 0.0372(11) Uani 1 1 d . . .
C71 C 0.6219(3) -0.1180(2) 0.2663(3) 0.0369(11) Uani 1 1 d . . .
H71 H 0.5736 -0.1423 0.2764 0.044 Uiso 1 1 calc R . .
C72 C 0.6723(3) -0.0694(2) 0.3169(2) 0.0325(10) Uani 1 1 d . . .
C73 C 0.7874(3) 0.2417(3) 0.4353(3) 0.0414(12) Uani 1 1 d . . .
H73A H 0.7759 0.2820 0.4615 0.062 Uiso 1 1 calc R . .
H73B H 0.7905 0.2008 0.4651 0.062 Uiso 1 1 calc R . .
H73C H 0.7436 0.2300 0.3928 0.062 Uiso 1 1 calc R . .
C74 C 1.0060(3) 0.4294(3) 0.3967(3) 0.0548(15) Uani 1 1 d . . .
H74A H 0.9743 0.4506 0.3559 0.082 Uiso 1 1 calc R . .
H74B H 1.0635 0.4343 0.3941 0.082 Uiso 1 1 calc R . .
H74C H 1.0015 0.4535 0.4401 0.082 Uiso 1 1 calc R . .
C75 C 1.0434(3) 0.1743(3) 0.3698(3) 0.0467(13) Uani 1 1 d . . .
H75A H 1.0738 0.1914 0.3347 0.070 Uiso 1 1 calc R . .
H75B H 1.0096 0.1291 0.3525 0.070 Uiso 1 1 calc R . .
H75C H 1.0820 0.1676 0.4141 0.070 Uiso 1 1 calc R . .
C76 C 0.8376(3) -0.0116(3) 0.2164(3) 0.0370(11) Uani 1 1 d . . .
H76A H 0.8609 -0.0472 0.1932 0.056 Uiso 1 1 calc R . .
H76B H 0.8772 0.0080 0.2592 0.056 Uiso 1 1 calc R . .
H76C H 0.8247 0.0265 0.1843 0.056 Uiso 1 1 calc R . .
C77 C 0.5848(3) -0.1878(3) 0.1493(3) 0.0501(14) Uani 1 1 d . . .
H77A H 0.5981 -0.1826 0.1031 0.075 Uiso 1 1 calc R . .
H77B H 0.5275 -0.1817 0.1454 0.075 Uiso 1 1 calc R . .
H77C H 0.5936 -0.2351 0.1658 0.075 Uiso 1 1 calc R . .
C78 C 0.6498(3) -0.0631(3) 0.3870(3) 0.0487(13) Uani 1 1 d . . .
H78A H 0.5908 -0.0620 0.3794 0.073 Uiso 1 1 calc R . .
H78B H 0.6793 -0.0193 0.4125 0.073 Uiso 1 1 calc R . .
H78C H 0.6645 -0.1038 0.4148 0.073 Uiso 1 1 calc R . .
C79 C 0.6162(3) 0.0669(3) 0.1913(2) 0.0366(11) Uani 1 1 d . . .
H79A H 0.6465 0.0694 0.1539 0.055 Uiso 1 1 calc R . .
H79B H 0.5613 0.0794 0.1727 0.055 Uiso 1 1 calc R . .
H79C H 0.6118 0.0188 0.2082 0.055 Uiso 1 1 calc R . .
C80 C 0.6273(3) 0.1109(3) 0.3447(3) 0.0417(12) Uani 1 1 d . . .
H80A H 0.6699 0.0979 0.3835 0.063 Uiso 1 1 calc R . .
H80B H 0.5824 0.0717 0.3326 0.063 Uiso 1 1 calc R . .
H80C H 0.6066 0.1531 0.3593 0.063 Uiso 1 1 calc R . .
C81 C 0.6515(3) 0.2207(3) 0.2378(3) 0.0404(11) Uani 1 1 d . . .
H81A H 0.6854 0.2561 0.2728 0.061 Uiso 1 1 calc R . .
H81B H 0.5936 0.2250 0.2338 0.061 Uiso 1 1 calc R . .
H81C H 0.6650 0.2286 0.1919 0.061 Uiso 1 1 calc R . .
Sb4 Sb 0.168188(17) 0.204191(16) 0.042099(14) 0.02616(7) Uani 1 1 d . . .
Cl7 Cl 0.18227(8) 0.32804(6) 0.06129(7) 0.0428(3) Uani 1 1 d . . .
Cl8 Cl 0.24844(7) 0.21821(7) -0.04493(6) 0.0385(3) Uani 1 1 d . . .
Si4 Si 0.36205(7) 0.20144(7) 0.13931(6) 0.0276(3) Uani 1 1 d . . .
N4 N 0.25521(19) 0.17005(17) 0.11895(16) 0.0216(7) Uani 1 1 d . . .
C82 C 0.2191(2) 0.1173(2) 0.15862(19) 0.0227(8) Uani 1 1 d . . .
C83 C 0.2443(2) 0.0493(2) 0.1655(2) 0.0224(8) Uani 1 1 d . . .
C84 C 0.2115(3) 0.0013(2) 0.2092(2) 0.0295(9) Uani 1 1 d . . .
H84 H 0.2299 -0.0437 0.2149 0.035 Uiso 1 1 calc R . .
C85 C 0.1530(3) 0.0178(2) 0.2441(2) 0.0333(10) Uani 1 1 d . . .
H85 H 0.1330 -0.0149 0.2745 0.040 Uiso 1 1 calc R . .
C86 C 0.1243(3) 0.0825(2) 0.2340(2) 0.0310(10) Uani 1 1 d . . .
H86 H 0.0824 0.0932 0.2561 0.037 Uiso 1 1 calc R . .
C87 C 0.1562(2) 0.1324(2) 0.1916(2) 0.0256(9) Uani 1 1 d . . .
C88 C 0.3007(2) 0.0198(2) 0.1267(2) 0.0231(8) Uani 1 1 d . . .
C89 C 0.3717(2) -0.0059(2) 0.1650(2) 0.0245(8) Uani 1 1 d . . .
C90 C 0.4192(3) -0.0390(2) 0.1274(2) 0.0306(10) Uani 1 1 d . . .
H90 H 0.4671 -0.0560 0.1530 0.037 Uiso 1 1 calc R . .
C91 C 0.3990(3) -0.0479(2) 0.0543(2) 0.0318(10) Uani 1 1 d . . .
C92 C 0.3286(3) -0.0231(2) 0.0181(2) 0.0290(9) Uani 1 1 d . . .
H92 H 0.3140 -0.0285 -0.0319 0.035 Uiso 1 1 calc R . .
C93 C 0.2785(2) 0.0094(2) 0.0527(2) 0.0243(8) Uani 1 1 d . . .
C94 C 0.1171(3) 0.1987(2) 0.1817(2) 0.0258(9) Uani 1 1 d . . .
C95 C 0.0378(3) 0.1958(2) 0.1380(2) 0.0273(9) Uani 1 1 d . . .
C96 C -0.0001(3) 0.2572(2) 0.1323(2) 0.0319(10) Uani 1 1 d . . .
H96 H -0.0530 0.2557 0.1023 0.038 Uiso 1 1 calc R . .
C97 C 0.0370(3) 0.3199(2) 0.1688(2) 0.0329(10) Uani 1 1 d . . .
C98 C 0.1136(3) 0.3210(2) 0.2137(2) 0.0326(10) Uani 1 1 d . . .
H98 H 0.1389 0.3635 0.2401 0.039 Uiso 1 1 calc R . .
C99 C 0.1547(3) 0.2612(2) 0.2211(2) 0.0294(9) Uani 1 1 d . . .
C100 C 0.3988(3) -0.0014(3) 0.2442(2) 0.0342(10) Uani 1 1 d . . .
H10A H 0.3791 -0.0460 0.2630 0.051 Uiso 1 1 calc R . .
H10B H 0.3764 0.0375 0.2631 0.051 Uiso 1 1 calc R . .
H10C H 0.4587 0.0071 0.2581 0.051 Uiso 1 1 calc R . .
C101 C 0.4515(3) -0.0854(3) 0.0160(3) 0.0476(13) Uani 1 1 d . . .
H10D H 0.4334 -0.1365 0.0131 0.071 Uiso 1 1 calc R . .
H10E H 0.5088 -0.0757 0.0417 0.071 Uiso 1 1 calc R . .
H10F H 0.4461 -0.0681 -0.0318 0.071 Uiso 1 1 calc R . .
C102 C 0.1999(3) 0.0286(2) 0.0081(2) 0.0309(10) Uani 1 1 d . . .
H10G H 0.2118 0.0712 -0.0173 0.046 Uiso 1 1 calc R . .
H10H H 0.1632 0.0378 0.0385 0.046 Uiso 1 1 calc R . .
H10I H 0.1736 -0.0106 -0.0258 0.046 Uiso 1 1 calc R . .
C103 C -0.0090(3) 0.1281(2) 0.1003(3) 0.0339(10) Uani 1 1 d . . .
H10J H -0.0316 0.0984 0.1337 0.051 Uiso 1 1 calc R . .
H10K H 0.0278 0.1026 0.0803 0.051 Uiso 1 1 calc R . .
H10L H -0.0537 0.1393 0.0623 0.051 Uiso 1 1 calc R . .
C104 C -0.0034(3) 0.3866(3) 0.1601(3) 0.0425(12) Uani 1 1 d . . .
H10M H 0.0285 0.4219 0.1376 0.064 Uiso 1 1 calc R . .
H10N H -0.0058 0.4055 0.2065 0.064 Uiso 1 1 calc R . .
H10O H -0.0589 0.3755 0.1306 0.064 Uiso 1 1 calc R . .
C105 C 0.2374(3) 0.2656(3) 0.2706(2) 0.0382(11) Uani 1 1 d . . .
H10P H 0.2799 0.2750 0.2439 0.057 Uiso 1 1 calc R . .
H10Q H 0.2425 0.2207 0.2938 0.057 Uiso 1 1 calc R . .
H10R H 0.2437 0.3040 0.3062 0.057 Uiso 1 1 calc R . .
C106 C 0.4060(3) 0.1834(3) 0.2338(2) 0.0388(11) Uani 1 1 d . . .
H10S H 0.4317 0.2280 0.2597 0.058 Uiso 1 1 calc R . .
H10T H 0.4470 0.1513 0.2358 0.058 Uiso 1 1 calc R . .
H10U H 0.3622 0.1616 0.2550 0.058 Uiso 1 1 calc R . .
C107 C 0.3783(3) 0.2985(3) 0.1291(3) 0.0405(11) Uani 1 1 d . . .
H10V H 0.3562 0.3089 0.0799 0.061 Uiso 1 1 calc R . .
H10W H 0.4369 0.3158 0.1422 0.061 Uiso 1 1 calc R . .
H10X H 0.3503 0.3221 0.1598 0.061 Uiso 1 1 calc R . .
C108 C 0.4195(3) 0.1612(3) 0.0815(2) 0.0348(10) Uani 1 1 d . . .
H10Y H 0.4157 0.1100 0.0876 0.052 Uiso 1 1 calc R . .
H10Z H 0.4770 0.1823 0.0943 0.052 Uiso 1 1 calc R . .
H11A H 0.3961 0.1700 0.0322 0.052 Uiso 1 1 calc R . .
C109 C 0.5976(6) -0.1073(5) 0.5699(5) 0.173(5) Uiso 1 1 d G . .
H109 H 0.5528 -0.1436 0.5666 0.208 Uiso 1 1 calc R . .
C110 C 0.6756(7) -0.1247(4) 0.5742(5) 0.218(7) Uiso 1 1 d G . .
H110 H 0.6841 -0.1729 0.5738 0.262 Uiso 1 1 calc R . .
C111 C 0.7412(5) -0.0715(6) 0.5790(5) 0.175(5) Uiso 1 1 d G . .
H111 H 0.7945 -0.0834 0.5819 0.210 Uiso 1 1 calc R . .
C112 C 0.7287(5) -0.0009(5) 0.5795(4) 0.145(4) Uiso 1 1 d G . .
H112 H 0.7736 0.0355 0.5828 0.174 Uiso 1 1 calc R . .
C113 C 0.6507(7) 0.0165(4) 0.5753(5) 0.229(7) Uiso 1 1 d G . .
H113 H 0.6422 0.0648 0.5756 0.275 Uiso 1 1 calc R . .
C114 C 0.5851(4) -0.0367(6) 0.5705(5) 0.155(4) Uiso 1 1 d G . .
H114 H 0.5318 -0.0248 0.5676 0.186 Uiso 1 1 calc R . .
C115 C 0.6484(8) 0.3169(6) 0.0466(7) 0.119(6) Uiso 0.590(18) 1 d PG A 1
H115 H 0.6603 0.2699 0.0426 0.143 Uiso 0.590(18) 1 calc PR A 1
C116 C 0.5677(7) 0.3301(7) 0.0317(7) 0.124(7) Uiso 0.590(18) 1 d PG A 1
H116 H 0.5245 0.2922 0.0176 0.149 Uiso 0.590(18) 1 calc PR A 1
C117 C 0.5503(6) 0.3989(8) 0.0375(7) 0.116(6) Uiso 0.590(18) 1 d PG A 1
H117 H 0.4951 0.4080 0.0274 0.139 Uiso 0.590(18) 1 calc PR A 1
C118 C 0.6136(9) 0.4545(7) 0.0582(7) 0.122(7) Uiso 0.590(18) 1 d PG A 1
H118 H 0.6017 0.5015 0.0622 0.146 Uiso 0.590(18) 1 calc PR A 1
C119 C 0.6943(8) 0.4412(7) 0.0731(7) 0.117(6) Uiso 0.590(18) 1 d PG A 1
H119 H 0.7375 0.4792 0.0873 0.140 Uiso 0.590(18) 1 calc PR A 1
C120 C 0.7117(6) 0.3724(8) 0.0673(7) 0.114(6) Uiso 0.590(18) 1 d PG A 1
H120 H 0.7668 0.3634 0.0775 0.137 Uiso 0.590(18) 1 calc PR A 1
C121 C 0.7355(11) 0.4252(14) 0.0732(10) 0.099(8) Uiso 0.410(18) 1 d PG A 2
H121 H 0.7908 0.4177 0.0779 0.119 Uiso 0.410(18) 1 calc PR A 2
C122 C 0.6737(15) 0.3679(11) 0.0601(12) 0.176(15) Uiso 0.410(18) 1 d PG A 2
H122 H 0.6867 0.3213 0.0559 0.211 Uiso 0.410(18) 1 calc PR A 2
C123 C 0.5928(13) 0.3788(13) 0.0532(13) 0.179(14) Uiso 0.410(18) 1 d PG A 2
H123 H 0.5506 0.3396 0.0442 0.215 Uiso 0.410(18) 1 calc PR A 2
C124 C 0.5738(11) 0.4470(16) 0.0594(12) 0.119(9) Uiso 0.410(18) 1 d PG A 2
H124 H 0.5185 0.4544 0.0546 0.142 Uiso 0.410(18) 1 calc PR A 2
C125 C 0.6356(16) 0.5043(12) 0.0725(12) 0.176(14) Uiso 0.410(18) 1 d PG A 2
H125 H 0.6226 0.5509 0.0767 0.211 Uiso 0.410(18) 1 calc PR A 2
C126 C 0.7165(14) 0.4934(12) 0.0794(11) 0.196(16) Uiso 0.410(18) 1 d PG A 2
H126 H 0.7587 0.5326 0.0884 0.235 Uiso 0.410(18) 1 calc PR A 2
 
loop_
 _atom_site_aniso_label
 _atom_site_aniso_U_11
 _atom_site_aniso_U_22
 _atom_site_aniso_U_33
 _atom_site_aniso_U_23
 _atom_site_aniso_U_13
 _atom_site_aniso_U_12
Sb1 0.02768(15) 0.02481(16) 0.02767(14) -0.00111(11) 0.00722(11) 0.00171(11)
Cl1 0.0558(7) 0.0230(6) 0.0510(7) -0.0023(5) 0.0203(6) 0.0024(5)
Cl2 0.0420(6) 0.0417(7) 0.0361(6) -0.0044(5) 0.0183(5) -0.0007(5)
Si1 0.0268(6) 0.0244(7) 0.0441(7) 0.0003(5) 0.0069(5) 0.0068(5)
N1 0.0263(17) 0.0210(19) 0.0285(18) -0.0009(14) 0.0042(14) 0.0063(14)
C1 0.029(2) 0.025(2) 0.026(2) 0.0010(17) 0.0032(17) 0.0078(17)
C2 0.029(2) 0.024(2) 0.029(2) -0.0021(17) 0.0015(17) 0.0063(17)
C3 0.041(3) 0.024(3) 0.038(2) -0.0008(19) 0.010(2) 0.0090(19)
C4 0.049(3) 0.034(3) 0.044(3) -0.003(2) 0.020(2) 0.015(2)
C5 0.035(2) 0.035(3) 0.035(2) 0.003(2) 0.0146(19) 0.009(2)
C6 0.032(2) 0.022(2) 0.027(2) 0.0040(17) 0.0088(17) 0.0058(17)
C7 0.030(2) 0.017(2) 0.042(2) 0.0009(18) 0.0081(18) 0.0075(17)
C8 0.036(2) 0.021(2) 0.046(3) 0.001(2) 0.008(2) 0.0047(19)
C9 0.039(3) 0.026(3) 0.056(3) -0.004(2) 0.012(2) 0.002(2)
C10 0.045(3) 0.031(3) 0.062(3) 0.009(2) 0.020(3) 0.006(2)
C11 0.045(3) 0.028(3) 0.045(3) 0.009(2) 0.015(2) 0.009(2)
C12 0.036(2) 0.023(2) 0.042(3) 0.0032(19) 0.011(2) 0.0110(19)
C13 0.030(2) 0.028(2) 0.027(2) 0.0054(17) 0.0119(17) 0.0043(18)
C14 0.039(2) 0.031(3) 0.031(2) 0.0100(19) 0.0118(19) 0.011(2)
C15 0.042(3) 0.028(3) 0.042(3) 0.013(2) 0.018(2) 0.009(2)
C16 0.044(3) 0.025(3) 0.041(3) 0.002(2) 0.021(2) 0.004(2)
C17 0.036(2) 0.031(3) 0.039(2) 0.006(2) 0.015(2) 0.005(2)
C18 0.033(2) 0.029(3) 0.029(2) 0.0060(18) 0.0148(18) 0.0049(18)
C19 0.046(3) 0.036(3) 0.048(3) -0.009(2) -0.001(2) 0.007(2)
C20 0.060(4) 0.048(4) 0.089(5) 0.020(3) 0.029(3) -0.005(3)
C21 0.043(3) 0.033(3) 0.034(2) 0.006(2) 0.004(2) 0.009(2)
C22 0.045(3) 0.038(3) 0.046(3) 0.016(2) 0.004(2) 0.008(2)
C23 0.056(3) 0.025(3) 0.062(3) 0.003(2) 0.025(3) 0.004(2)
C24 0.031(2) 0.033(3) 0.046(3) 0.012(2) 0.014(2) 0.0087(19)
C25 0.038(3) 0.044(3) 0.046(3) 0.004(2) -0.004(2) 0.009(2)
C26 0.031(2) 0.035(3) 0.057(3) 0.004(2) 0.013(2) 0.005(2)
C27 0.035(3) 0.032(3) 0.074(4) -0.001(3) 0.005(2) 0.011(2)
Sb2 0.03108(15) 0.02367(16) 0.02869(15) 0.00431(11) 0.01023(12) 0.00685(12)
Cl3 0.0617(8) 0.0225(6) 0.0454(7) 0.0026(5) 0.0185(6) 0.0110(5)
Cl4 0.0475(7) 0.0466(8) 0.0306(6) 0.0063(5) 0.0060(5) 0.0109(6)
Si2 0.0294(6) 0.0255(7) 0.0497(8) 0.0005(6) 0.0112(6) 0.0014(5)
N2 0.0289(18) 0.0189(19) 0.0328(19) 0.0029(14) 0.0111(15) 0.0049(14)
C28 0.030(2) 0.017(2) 0.032(2) 0.0055(17) 0.0125(17) 0.0035(16)
C29 0.033(2) 0.022(2) 0.038(2) 0.0061(18) 0.0113(19) 0.0044(18)
C30 0.048(3) 0.036(3) 0.032(2) 0.004(2) 0.001(2) 0.005(2)
C31 0.057(3) 0.032(3) 0.036(3) -0.003(2) 0.009(2) 0.005(2)
C32 0.047(3) 0.022(3) 0.052(3) -0.002(2) 0.012(2) 0.005(2)
C33 0.038(2) 0.018(2) 0.038(2) 0.0026(18) 0.0160(19) 0.0036(18)
C34 0.036(2) 0.024(2) 0.028(2) 0.0056(17) 0.0055(18) 0.0070(18)
C35 0.039(2) 0.030(3) 0.027(2) 0.0064(18) 0.0075(18) 0.0078(19)
C36 0.046(3) 0.025(3) 0.030(2) 0.0075(18) 0.001(2) 0.004(2)
C37 0.045(3) 0.033(3) 0.032(2) 0.002(2) -0.003(2) 0.016(2)
C38 0.032(2) 0.045(3) 0.033(2) 0.002(2) 0.0052(19) 0.014(2)
C39 0.035(2) 0.032(3) 0.035(2) 0.0054(19) 0.0069(19) 0.006(2)
C40 0.035(2) 0.018(2) 0.040(2) 0.0027(18) 0.0121(19) 0.0030(18)
C41 0.038(2) 0.020(2) 0.040(2) 0.0015(19) 0.013(2) 0.0018(18)
C42 0.038(2) 0.027(3) 0.041(3) 0.010(2) 0.012(2) 0.0014(19)
C43 0.039(3) 0.027(3) 0.054(3) 0.011(2) 0.008(2) 0.002(2)
C44 0.036(3) 0.026(3) 0.062(3) 0.006(2) 0.016(2) 0.007(2)
C45 0.041(3) 0.021(2) 0.045(3) 0.0039(19) 0.018(2) 0.0066(19)
C46 0.046(3) 0.038(3) 0.054(3) 0.015(2) 0.024(2) 0.006(2)
C47 0.058(3) 0.037(3) 0.056(3) -0.004(3) -0.003(3) 0.024(3)
C48 0.035(3) 0.052(4) 0.057(3) 0.017(3) 0.009(2) 0.001(2)
C49 0.042(3) 0.029(3) 0.049(3) 0.009(2) 0.020(2) 0.008(2)
C50 0.037(3) 0.056(4) 0.072(4) 0.033(3) 0.007(3) 0.006(3)
C51 0.056(3) 0.034(3) 0.062(3) 0.002(2) 0.032(3) 0.015(2)
C52 0.030(2) 0.044(3) 0.058(3) -0.003(2) 0.000(2) 0.009(2)
C53 0.042(3) 0.041(3) 0.075(4) 0.011(3) 0.030(3) 0.007(2)
C54 0.045(3) 0.028(3) 0.081(4) -0.005(3) 0.017(3) -0.006(2)
Sb3 0.02774(14) 0.02245(16) 0.02540(14) -0.00097(11) 0.00779(11) 0.00209(11)
Cl5 0.0471(6) 0.0212(6) 0.0397(6) 0.0013(4) 0.0125(5) 0.0034(5)
Cl6 0.0432(6) 0.0379(7) 0.0262(5) -0.0015(5) 0.0051(5) -0.0011(5)
Si3 0.0264(6) 0.0269(7) 0.0322(6) 0.0014(5) 0.0053(5) 0.0057(5)
N3 0.0240(17) 0.0210(19) 0.0248(17) 0.0010(13) 0.0054(13) 0.0022(13)
C55 0.025(2) 0.025(2) 0.024(2) 0.0012(16) 0.0092(16) 0.0067(16)
C56 0.029(2) 0.025(2) 0.025(2) -0.0031(17) 0.0064(17) 0.0083(17)
C57 0.037(3) 0.040(3) 0.030(2) -0.002(2) 0.0003(19) 0.005(2)
C58 0.045(3) 0.038(3) 0.038(3) 0.011(2) -0.003(2) 0.015(2)
C59 0.043(3) 0.023(3) 0.039(3) 0.0082(19) 0.005(2) 0.006(2)
C60 0.030(2) 0.028(3) 0.028(2) 0.0002(17) 0.0089(17) 0.0059(18)
C61 0.027(2) 0.029(3) 0.024(2) -0.0044(17) 0.0037(16) 0.0035(17)
C62 0.034(2) 0.024(2) 0.027(2) -0.0035(17) 0.0061(18) 0.0045(18)
C63 0.045(3) 0.031(3) 0.033(2) -0.007(2) 0.002(2) 0.008(2)
C64 0.044(3) 0.029(3) 0.033(2) 0.0021(19) -0.003(2) -0.001(2)
C65 0.031(2) 0.048(3) 0.031(2) -0.003(2) 0.0042(19) -0.009(2)
C66 0.026(2) 0.041(3) 0.030(2) -0.0083(19) 0.0042(18) 0.0000(19)
C67 0.037(2) 0.018(2) 0.030(2) 0.0039(17) 0.0040(18) 0.0077(18)
C68 0.039(2) 0.016(2) 0.039(2) 0.0012(18) 0.010(2) 0.0065(18)
C69 0.046(3) 0.025(3) 0.035(2) -0.0012(19) 0.008(2) 0.013(2)
C70 0.040(3) 0.022(3) 0.044(3) -0.001(2) -0.003(2) 0.007(2)
C71 0.038(3) 0.023(3) 0.047(3) 0.009(2) 0.006(2) -0.0027(19)
C72 0.038(2) 0.028(3) 0.031(2) 0.0050(18) 0.0065(19) 0.0038(19)
C73 0.038(3) 0.043(3) 0.046(3) -0.011(2) 0.016(2) 0.005(2)
C74 0.058(3) 0.034(3) 0.060(4) 0.008(3) -0.004(3) -0.006(3)
C75 0.032(3) 0.058(4) 0.049(3) -0.016(3) 0.007(2) 0.010(2)
C76 0.043(3) 0.029(3) 0.044(3) -0.004(2) 0.016(2) 0.008(2)
C77 0.051(3) 0.030(3) 0.059(3) -0.008(2) -0.006(3) 0.003(2)
C78 0.056(3) 0.044(3) 0.048(3) 0.006(2) 0.024(3) -0.007(3)
C79 0.033(2) 0.034(3) 0.038(3) 0.002(2) -0.0004(19) 0.000(2)
C80 0.031(2) 0.048(3) 0.046(3) 0.002(2) 0.012(2) 0.001(2)
C81 0.034(2) 0.030(3) 0.057(3) 0.003(2) 0.007(2) 0.009(2)
Sb4 0.03002(15) 0.02456(16) 0.02581(14) 0.00278(11) 0.00805(11) 0.00767(11)
Cl7 0.0605(8) 0.0246(6) 0.0507(7) 0.0067(5) 0.0228(6) 0.0151(5)
Cl8 0.0479(7) 0.0424(7) 0.0318(6) 0.0084(5) 0.0188(5) 0.0121(5)
Si4 0.0270(6) 0.0223(7) 0.0340(6) -0.0012(5) 0.0094(5) 0.0018(5)
N4 0.0254(17) 0.0174(18) 0.0234(16) 0.0003(13) 0.0076(13) 0.0046(13)
C82 0.026(2) 0.020(2) 0.0205(19) -0.0019(15) 0.0042(15) 0.0009(16)
C83 0.0242(19) 0.020(2) 0.0229(19) -0.0022(15) 0.0049(15) 0.0015(16)
C84 0.036(2) 0.021(2) 0.033(2) 0.0033(17) 0.0083(18) 0.0049(18)
C85 0.045(3) 0.028(3) 0.032(2) 0.0059(19) 0.018(2) 0.003(2)
C86 0.036(2) 0.029(3) 0.032(2) 0.0020(18) 0.0171(19) 0.0065(19)
C87 0.031(2) 0.019(2) 0.027(2) -0.0049(16) 0.0088(17) 0.0020(17)
C88 0.026(2) 0.015(2) 0.029(2) -0.0004(16) 0.0062(16) 0.0038(15)
C89 0.026(2) 0.017(2) 0.028(2) -0.0027(16) 0.0047(16) 0.0003(16)
C90 0.028(2) 0.025(2) 0.039(2) -0.0014(19) 0.0038(18) 0.0090(18)
C91 0.035(2) 0.022(2) 0.041(3) -0.0033(19) 0.012(2) 0.0070(18)
C92 0.035(2) 0.024(2) 0.027(2) -0.0044(17) 0.0058(18) 0.0048(18)
C93 0.024(2) 0.020(2) 0.028(2) -0.0003(16) 0.0059(16) 0.0016(16)
C94 0.034(2) 0.020(2) 0.028(2) -0.0022(16) 0.0150(17) 0.0058(17)
C95 0.030(2) 0.022(2) 0.033(2) -0.0009(17) 0.0145(18) 0.0033(17)
C96 0.029(2) 0.027(3) 0.043(3) 0.001(2) 0.0152(19) 0.0067(18)
C97 0.037(2) 0.027(3) 0.040(3) 0.0002(19) 0.018(2) 0.0065(19)
C98 0.040(3) 0.025(3) 0.035(2) -0.0069(19) 0.015(2) 0.0041(19)
C99 0.034(2) 0.025(2) 0.032(2) -0.0063(18) 0.0140(18) 0.0039(18)
C100 0.039(2) 0.033(3) 0.029(2) -0.0018(19) 0.0022(19) 0.007(2)
C101 0.050(3) 0.049(4) 0.052(3) -0.003(3) 0.018(2) 0.024(3)
C102 0.033(2) 0.028(3) 0.030(2) -0.0026(18) 0.0021(18) 0.0075(18)
C103 0.031(2) 0.025(3) 0.048(3) -0.006(2) 0.013(2) 0.0038(18)
C104 0.046(3) 0.029(3) 0.059(3) 0.002(2) 0.023(2) 0.013(2)
C105 0.042(3) 0.032(3) 0.038(3) -0.012(2) 0.006(2) 0.003(2)
C106 0.031(2) 0.039(3) 0.042(3) -0.003(2) 0.004(2) 0.001(2)
C107 0.042(3) 0.027(3) 0.054(3) -0.001(2) 0.016(2) -0.001(2)
C108 0.032(2) 0.034(3) 0.042(3) 0.000(2) 0.014(2) 0.0068(19)

#==============================================================================

# MOLECULAR GEOMETRY 
 
_geom_special_details
;
 All s.u.'s (except the s.u. in the dihedral angle between two l.s. planes)
 are estimated using the full covariance matrix.  The cell s.u.'s are taken
 into account individually in the estimation of s.u.'s in distances, angles
 and torsion angles; correlations between s.u.'s in cell parameters are only
 used when they are defined by crystal symmetry.  An approximate (isotropic)
 treatment of cell s.u.'s is used for estimating s.u.'s involving l.s. planes.
;
 
loop_
 _geom_bond_atom_site_label_1
 _geom_bond_atom_site_label_2
 _geom_bond_distance
 _geom_bond_site_symmetry_2
 _geom_bond_publ_flag
Sb1 N1 2.033(3) . ?
Sb1 Cl1 2.362(2) . ?
Sb1 Cl2 2.3957(16) . ?
Si1 N1 1.783(4) . ?
Si1 C27 1.864(5) . ?
Si1 C25 1.867(5) . ?
Si1 C26 1.870(5) . ?
N1 C1 1.451(5) . ?
C1 C2 1.412(6) . ?
C1 C6 1.421(6) . ?
C2 C3 1.401(6) . ?
C2 C7 1.508(6) . ?
C3 C4 1.369(7) . ?
C3 H3 0.9500 . ?
C4 C5 1.378(7) . ?
C4 H4 0.9500 . ?
C5 C6 1.396(6) . ?
C5 H5 0.9500 . ?
C6 C13 1.490(6) . ?
C7 C12 1.401(6) . ?
C7 C8 1.414(6) . ?
C8 C9 1.385(7) . ?
C8 C19 1.510(7) . ?
C9 C10 1.384(7) . ?
C9 H9 0.9500 . ?
C10 C11 1.389(7) . ?
C10 C20 1.509(7) . ?
C11 C12 1.389(6) . ?
C11 H11 0.9500 . ?
C12 C21 1.508(6) . ?
C13 C14 1.409(6) . ?
C13 C18 1.411(6) . ?
C14 C15 1.384(7) . ?
C14 C22 1.501(6) . ?
C15 C16 1.398(7) . ?
C15 H15 0.9500 . ?
C16 C17 1.395(6) . ?
C16 C23 1.504(7) . ?
C17 C18 1.397(6) . ?
C17 H17 0.9500 . ?
C18 C24 1.518(6) . ?
C19 H19A 0.9800 . ?
C19 H19B 0.9800 . ?
C19 H19C 0.9800 . ?
C20 H20A 0.9800 . ?
C20 H20B 0.9800 . ?
C20 H20C 0.9800 . ?
C21 H21A 0.9800 . ?
C21 H21B 0.9800 . ?
C21 H21C 0.9800 . ?
C22 H22A 0.9800 . ?
C22 H22B 0.9800 . ?
C22 H22C 0.9800 . ?
C23 H23A 0.9800 . ?
C23 H23B 0.9800 . ?
C23 H23C 0.9800 . ?
C24 H24A 0.9800 . ?
C24 H24B 0.9800 . ?
C24 H24C 0.9800 . ?
C25 H25A 0.9800 . ?
C25 H25B 0.9800 . ?
C25 H25C 0.9800 . ?
C26 H26A 0.9800 . ?
C26 H26B 0.9800 . ?
C26 H26C 0.9800 . ?
C27 H27A 0.9800 . ?
C27 H27B 0.9800 . ?
C27 H27C 0.9800 . ?
Sb2 N2 2.032(3) . ?
Sb2 Cl3 2.350(2) . ?
Sb2 Cl4 2.3952(18) . ?
Si2 N2 1.776(4) . ?
Si2 C54 1.860(5) . ?
Si2 C52 1.860(5) . ?
Si2 C53 1.871(5) . ?
N2 C28 1.439(5) . ?
C28 C29 1.415(6) . ?
C28 C33 1.420(6) . ?
C29 C30 1.403(6) . ?
C29 C34 1.501(6) . ?
C30 C31 1.377(7) . ?
C30 H30 0.9500 . ?
C31 C32 1.379(7) . ?
C31 H31 0.9500 . ?
C32 C33 1.405(7) . ?
C32 H32 0.9500 . ?
C33 C40 1.501(6) . ?
C34 C39 1.403(6) . ?
C34 C35 1.415(6) . ?
C35 C36 1.380(6) . ?
C35 C46 1.503(6) . ?
C36 C37 1.390(7) . ?
C36 H36 0.9500 . ?
C37 C38 1.384(7) . ?
C37 C47 1.514(7) . ?
C38 C39 1.401(7) . ?
C38 H38 0.9500 . ?
C39 C48 1.520(7) . ?
C40 C45 1.406(6) . ?
C40 C41 1.413(6) . ?
C41 C42 1.388(6) . ?
C41 C49 1.510(6) . ?
C42 C43 1.380(7) . ?
C42 H42 0.9500 . ?
C43 C44 1.399(7) . ?
C43 C50 1.503(7) . ?
C44 C45 1.391(7) . ?
C44 H44 0.9500 . ?
C45 C51 1.511(6) . ?
C46 H46A 0.9800 . ?
C46 H46B 0.9800 . ?
C46 H46C 0.9800 . ?
C47 H47A 0.9800 . ?
C47 H47B 0.9800 . ?
C47 H47C 0.9800 . ?
C48 H48A 0.9800 . ?
C48 H48B 0.9800 . ?
C48 H48C 0.9800 . ?
C49 H49A 0.9800 . ?
C49 H49B 0.9800 . ?
C49 H49C 0.9800 . ?
C50 H50A 0.9800 . ?
C50 H50B 0.9800 . ?
C50 H50C 0.9800 . ?
C51 H51A 0.9800 . ?
C51 H51B 0.9800 . ?
C51 H51C 0.9800 . ?
C52 H52A 0.9800 . ?
C52 H52B 0.9800 . ?
C52 H52C 0.9800 . ?
C53 H53A 0.9800 . ?
C53 H53B 0.9800 . ?
C53 H53C 0.9800 . ?
C54 H54A 0.9800 . ?
C54 H54B 0.9800 . ?
C54 H54C 0.9800 . ?
Sb3 N3 2.031(3) . ?
Sb3 Cl5 2.3547(19) . ?
Sb3 Cl6 2.3945(18) . ?
Si3 N3 1.780(4) . ?
Si3 C79 1.865(5) . ?
Si3 C81 1.866(5) . ?
Si3 C80 1.877(5) . ?
N3 C55 1.442(5) . ?
C55 C60 1.411(6) . ?
C55 C56 1.420(6) . ?
C56 C57 1.390(6) . ?
C56 C61 1.496(6) . ?
C57 C58 1.368(7) . ?
C57 H57 0.9500 . ?
C58 C59 1.389(7) . ?
C58 H58 0.9500 . ?
C59 C60 1.393(6) . ?
C59 H59 0.9500 . ?
C60 C67 1.505(6) . ?
C61 C66 1.406(6) . ?
C61 C62 1.419(6) . ?
C62 C63 1.381(6) . ?
C62 C73 1.500(6) . ?
C63 C64 1.383(7) . ?
C63 H63 0.9500 . ?
C64 C65 1.390(7) . ?
C64 C74 1.506(7) . ?
C65 C66 1.390(7) . ?
C65 H65 0.9500 . ?
C66 C75 1.524(6) . ?
C67 C72 1.404(6) . ?
C67 C68 1.417(6) . ?
C68 C69 1.392(6) . ?
C68 C76 1.505(6) . ?
C69 C70 1.386(7) . ?
C69 H69 0.9500 . ?
C70 C71 1.389(7) . ?
C70 C77 1.519(7) . ?
C71 C72 1.395(6) . ?
C71 H71 0.9500 . ?
C72 C78 1.507(6) . ?
C73 H73A 0.9800 . ?
C73 H73B 0.9800 . ?
C73 H73C 0.9800 . ?
C74 H74A 0.9800 . ?
C74 H74B 0.9800 . ?
C74 H74C 0.9800 . ?
C75 H75A 0.9800 . ?
C75 H75B 0.9800 . ?
C75 H75C 0.9800 . ?
C76 H76A 0.9800 . ?
C76 H76B 0.9800 . ?
C76 H76C 0.9800 . ?
C77 H77A 0.9800 . ?
C77 H77B 0.9800 . ?
C77 H77C 0.9800 . ?
C78 H78A 0.9800 . ?
C78 H78B 0.9800 . ?
C78 H78C 0.9800 . ?
C79 H79A 0.9800 . ?
C79 H79B 0.9800 . ?
C79 H79C 0.9800 . ?
C80 H80A 0.9800 . ?
C80 H80B 0.9800 . ?
C80 H80C 0.9800 . ?
C81 H81A 0.9800 . ?
C81 H81B 0.9800 . ?
C81 H81C 0.9800 . ?
Sb4 N4 2.031(3) . ?
Sb4 Cl7 2.358(2) . ?
Sb4 Cl8 2.4004(16) . ?
Si4 N4 1.784(4) . ?
Si4 C107 1.857(5) . ?
Si4 C108 1.863(4) . ?
Si4 C106 1.878(5) . ?
N4 C82 1.436(5) . ?
C82 C83 1.417(6) . ?
C82 C87 1.420(5) . ?
C83 C84 1.405(6) . ?
C83 C88 1.501(5) . ?
C84 C85 1.387(6) . ?
C84 H84 0.9500 . ?
C85 C86 1.385(6) . ?
C85 H85 0.9500 . ?
C86 C87 1.406(6) . ?
C86 H86 0.9500 . ?
C87 C94 1.498(6) . ?
C88 C93 1.411(5) . ?
C88 C89 1.416(6) . ?
C89 C90 1.402(6) . ?
C89 C100 1.506(6) . ?
C90 C91 1.390(6) . ?
C90 H90 0.9500 . ?
C91 C92 1.386(6) . ?
C91 C101 1.521(6) . ?
C92 C93 1.393(6) . ?
C92 H92 0.9500 . ?
C93 C102 1.509(6) . ?
C94 C99 1.404(6) . ?
C94 C95 1.413(6) . ?
C95 C96 1.401(6) . ?
C95 C103 1.510(6) . ?
C96 C97 1.381(6) . ?
C96 H96 0.9500 . ?
C97 C98 1.389(6) . ?
C97 C104 1.515(6) . ?
C98 C99 1.405(6) . ?
C98 H98 0.9500 . ?
C99 C105 1.503(6) . ?
C100 H10A 0.9800 . ?
C100 H10B 0.9800 . ?
C100 H10C 0.9800 . ?
C101 H10D 0.9800 . ?
C101 H10E 0.9800 . ?
C101 H10F 0.9800 . ?
C102 H10G 0.9800 . ?
C102 H10H 0.9800 . ?
C102 H10I 0.9800 . ?
C103 H10J 0.9800 . ?
C103 H10K 0.9800 . ?
C103 H10L 0.9800 . ?
C104 H10M 0.9800 . ?
C104 H10N 0.9800 . ?
C104 H10O 0.9800 . ?
C105 H10P 0.9800 . ?
C105 H10Q 0.9800 . ?
C105 H10R 0.9800 . ?
C106 H10S 0.9800 . ?
C106 H10T 0.9800 . ?
C106 H10U 0.9800 . ?
C107 H10V 0.9800 . ?
C107 H10W 0.9800 . ?
C107 H10X 0.9800 . ?
C108 H10Y 0.9800 . ?
C108 H10Z 0.9800 . ?
C108 H11A 0.9800 . ?
C109 C110 1.3900 . ?
C109 C114 1.3900 . ?
C109 H109 0.9500 . ?
C110 C111 1.3900 . ?
C110 H110 0.9500 . ?
C111 C112 1.3900 . ?
C111 H111 0.9500 . ?
C112 C113 1.3900 . ?
C112 H112 0.9500 . ?
C113 C114 1.3900 . ?
C113 H113 0.9500 . ?
C114 H114 0.9500 . ?
C115 C116 1.3900 . ?
C115 C120 1.3900 . ?
C115 H115 0.9500 . ?
C116 C117 1.3900 . ?
C116 H116 0.9500 . ?
C117 C118 1.3900 . ?
C117 H117 0.9500 . ?
C118 C119 1.3900 . ?
C118 H118 0.9500 . ?
C119 C120 1.3900 . ?
C119 H119 0.9500 . ?
C120 H120 0.9500 . ?
C121 C122 1.3900 . ?
C121 C126 1.3900 . ?
C121 H121 0.9500 . ?
C122 C123 1.3900 . ?
C122 H122 0.9500 . ?
C123 C124 1.3900 . ?
C123 H123 0.9500 . ?
C124 C125 1.3900 . ?
C124 H124 0.9500 . ?
C125 C126 1.3900 . ?
C125 H125 0.9500 . ?
C126 H126 0.9500 . ?
 
loop_
 _geom_angle_atom_site_label_1
 _geom_angle_atom_site_label_2
 _geom_angle_atom_site_label_3
 _geom_angle
 _geom_angle_site_symmetry_1
 _geom_angle_site_symmetry_3
 _geom_angle_publ_flag
N1 Sb1 Cl1 106.05(11) . . ?
N1 Sb1 Cl2 96.72(11) . . ?
Cl1 Sb1 Cl2 90.34(5) . . ?
N1 Si1 C27 108.8(2) . . ?
N1 Si1 C25 109.1(2) . . ?
C27 Si1 C25 108.5(2) . . ?
N1 Si1 C26 113.8(2) . . ?
C27 Si1 C26 107.6(2) . . ?
C25 Si1 C26 108.9(2) . . ?
C1 N1 Si1 123.5(3) . . ?
C1 N1 Sb1 110.4(2) . . ?
Si1 N1 Sb1 126.07(18) . . ?
C2 C1 C6 118.5(4) . . ?
C2 C1 N1 121.8(4) . . ?
C6 C1 N1 119.7(4) . . ?
C3 C2 C1 119.1(4) . . ?
C3 C2 C7 114.6(4) . . ?
C1 C2 C7 126.2(4) . . ?
C4 C3 C2 122.2(5) . . ?
C4 C3 H3 118.9 . . ?
C2 C3 H3 118.9 . . ?
C3 C4 C5 118.7(4) . . ?
C3 C4 H4 120.7 . . ?
C5 C4 H4 120.7 . . ?
C4 C5 C6 121.9(4) . . ?
C4 C5 H5 119.1 . . ?
C6 C5 H5 119.1 . . ?
C5 C6 C1 119.3(4) . . ?
C5 C6 C13 116.7(4) . . ?
C1 C6 C13 123.9(4) . . ?
C12 C7 C8 119.6(4) . . ?
C12 C7 C2 121.0(4) . . ?
C8 C7 C2 118.6(4) . . ?
C9 C8 C7 118.2(4) . . ?
C9 C8 C19 117.9(4) . . ?
C7 C8 C19 123.9(4) . . ?
C10 C9 C8 123.5(5) . . ?
C10 C9 H9 118.3 . . ?
C8 C9 H9 118.3 . . ?
C9 C10 C11 117.0(5) . . ?
C9 C10 C20 122.1(5) . . ?
C11 C10 C20 120.8(5) . . ?
C12 C11 C10 122.3(5) . . ?
C12 C11 H11 118.8 . . ?
C10 C11 H11 118.8 . . ?
C11 C12 C7 119.3(4) . . ?
C11 C12 C21 117.8(4) . . ?
C7 C12 C21 122.9(4) . . ?
C14 C13 C18 119.6(4) . . ?
C14 C13 C6 120.9(4) . . ?
C18 C13 C6 119.1(4) . . ?
C15 C14 C13 119.3(4) . . ?
C15 C14 C22 119.4(4) . . ?
C13 C14 C22 121.3(4) . . ?
C14 C15 C16 122.2(4) . . ?
C14 C15 H15 118.9 . . ?
C16 C15 H15 118.9 . . ?
C17 C16 C15 118.0(4) . . ?
C17 C16 C23 121.9(5) . . ?
C15 C16 C23 120.1(4) . . ?
C16 C17 C18 121.7(5) . . ?
C16 C17 H17 119.2 . . ?
C18 C17 H17 119.2 . . ?
C17 C18 C13 119.1(4) . . ?
C17 C18 C24 118.7(4) . . ?
C13 C18 C24 122.1(4) . . ?
C8 C19 H19A 109.5 . . ?
C8 C19 H19B 109.5 . . ?
H19A C19 H19B 109.5 . . ?
C8 C19 H19C 109.5 . . ?
H19A C19 H19C 109.5 . . ?
H19B C19 H19C 109.5 . . ?
C10 C20 H20A 109.5 . . ?
C10 C20 H20B 109.5 . . ?
H20A C20 H20B 109.5 . . ?
C10 C20 H20C 109.5 . . ?
H20A C20 H20C 109.5 . . ?
H20B C20 H20C 109.5 . . ?
C12 C21 H21A 109.5 . . ?
C12 C21 H21B 109.5 . . ?
H21A C21 H21B 109.5 . . ?
C12 C21 H21C 109.5 . . ?
H21A C21 H21C 109.5 . . ?
H21B C21 H21C 109.5 . . ?
C14 C22 H22A 109.5 . . ?
C14 C22 H22B 109.5 . . ?
H22A C22 H22B 109.5 . . ?
C14 C22 H22C 109.5 . . ?
H22A C22 H22C 109.5 . . ?
H22B C22 H22C 109.5 . . ?
C16 C23 H23A 109.5 . . ?
C16 C23 H23B 109.5 . . ?
H23A C23 H23B 109.5 . . ?
C16 C23 H23C 109.5 . . ?
H23A C23 H23C 109.5 . . ?
H23B C23 H23C 109.5 . . ?
C18 C24 H24A 109.5 . . ?
C18 C24 H24B 109.5 . . ?
H24A C24 H24B 109.5 . . ?
C18 C24 H24C 109.5 . . ?
H24A C24 H24C 109.5 . . ?
H24B C24 H24C 109.5 . . ?
Si1 C25 H25A 109.5 . . ?
Si1 C25 H25B 109.5 . . ?
H25A C25 H25B 109.5 . . ?
Si1 C25 H25C 109.5 . . ?
H25A C25 H25C 109.5 . . ?
H25B C25 H25C 109.5 . . ?
Si1 C26 H26A 109.5 . . ?
Si1 C26 H26B 109.5 . . ?
H26A C26 H26B 109.5 . . ?
Si1 C26 H26C 109.5 . . ?
H26A C26 H26C 109.5 . . ?
H26B C26 H26C 109.5 . . ?
Si1 C27 H27A 109.5 . . ?
Si1 C27 H27B 109.5 . . ?
H27A C27 H27B 109.5 . . ?
Si1 C27 H27C 109.5 . . ?
H27A C27 H27C 109.5 . . ?
H27B C27 H27C 109.5 . . ?
N2 Sb2 Cl3 104.89(11) . . ?
N2 Sb2 Cl4 96.78(11) . . ?
Cl3 Sb2 Cl4 90.26(5) . . ?
N2 Si2 C54 109.9(2) . . ?
N2 Si2 C52 114.0(2) . . ?
C54 Si2 C52 106.2(3) . . ?
N2 Si2 C53 108.8(2) . . ?
C54 Si2 C53 107.8(3) . . ?
C52 Si2 C53 109.9(2) . . ?
C28 N2 Si2 123.1(3) . . ?
C28 N2 Sb2 110.5(2) . . ?
Si2 N2 Sb2 126.38(19) . . ?
C29 C28 C33 118.1(4) . . ?
C29 C28 N2 120.1(4) . . ?
C33 C28 N2 121.7(4) . . ?
C30 C29 C28 120.3(4) . . ?
C30 C29 C34 116.1(4) . . ?
C28 C29 C34 123.6(4) . . ?
C31 C30 C29 121.1(4) . . ?
C31 C30 H30 119.4 . . ?
C29 C30 H30 119.4 . . ?
C30 C31 C32 119.1(5) . . ?
C30 C31 H31 120.4 . . ?
C32 C31 H31 120.4 . . ?
C31 C32 C33 121.9(5) . . ?
C31 C32 H32 119.0 . . ?
C33 C32 H32 119.0 . . ?
C32 C33 C28 119.2(4) . . ?
C32 C33 C40 117.4(4) . . ?
C28 C33 C40 123.4(4) . . ?
C39 C34 C35 119.6(4) . . ?
C39 C34 C29 119.5(4) . . ?
C35 C34 C29 120.6(4) . . ?
C36 C35 C34 118.9(4) . . ?
C36 C35 C46 119.9(4) . . ?
C34 C35 C46 121.1(4) . . ?
C35 C36 C37 122.4(5) . . ?
C35 C36 H36 118.8 . . ?
C37 C36 H36 118.8 . . ?
C38 C37 C36 118.3(4) . . ?
C38 C37 C47 120.2(5) . . ?
C36 C37 C47 121.4(5) . . ?
C37 C38 C39 121.5(4) . . ?
C37 C38 H38 119.2 . . ?
C39 C38 H38 119.2 . . ?
C38 C39 C34 119.2(4) . . ?
C38 C39 C48 117.9(4) . . ?
C34 C39 C48 122.9(4) . . ?
C45 C40 C41 118.6(4) . . ?
C45 C40 C33 121.5(4) . . ?
C41 C40 C33 119.7(4) . . ?
C42 C41 C40 119.4(4) . . ?
C42 C41 C49 117.8(4) . . ?
C40 C41 C49 122.8(4) . . ?
C43 C42 C41 122.9(4) . . ?
C43 C42 H42 118.5 . . ?
C41 C42 H42 118.5 . . ?
C42 C43 C44 116.9(4) . . ?
C42 C43 C50 122.0(5) . . ?
C44 C43 C50 121.1(5) . . ?
C45 C44 C43 122.6(4) . . ?
C45 C44 H44 118.7 . . ?
C43 C44 H44 118.7 . . ?
C44 C45 C40 119.3(4) . . ?
C44 C45 C51 117.4(4) . . ?
C40 C45 C51 123.2(4) . . ?
C35 C46 H46A 109.5 . . ?
C35 C46 H46B 109.5 . . ?
H46A C46 H46B 109.5 . . ?
C35 C46 H46C 109.5 . . ?
H46A C46 H46C 109.5 . . ?
H46B C46 H46C 109.5 . . ?
C37 C47 H47A 109.5 . . ?
C37 C47 H47B 109.5 . . ?
H47A C47 H47B 109.5 . . ?
C37 C47 H47C 109.5 . . ?
H47A C47 H47C 109.5 . . ?
H47B C47 H47C 109.5 . . ?
C39 C48 H48A 109.5 . . ?
C39 C48 H48B 109.5 . . ?
H48A C48 H48B 109.5 . . ?
C39 C48 H48C 109.5 . . ?
H48A C48 H48C 109.5 . . ?
H48B C48 H48C 109.5 . . ?
C41 C49 H49A 109.5 . . ?
C41 C49 H49B 109.5 . . ?
H49A C49 H49B 109.5 . . ?
C41 C49 H49C 109.5 . . ?
H49A C49 H49C 109.5 . . ?
H49B C49 H49C 109.5 . . ?
C43 C50 H50A 109.5 . . ?
C43 C50 H50B 109.5 . . ?
H50A C50 H50B 109.5 . . ?
C43 C50 H50C 109.5 . . ?
H50A C50 H50C 109.5 . . ?
H50B C50 H50C 109.5 . . ?
C45 C51 H51A 109.5 . . ?
C45 C51 H51B 109.5 . . ?
H51A C51 H51B 109.5 . . ?
C45 C51 H51C 109.5 . . ?
H51A C51 H51C 109.5 . . ?
H51B C51 H51C 109.5 . . ?
Si2 C52 H52A 109.5 . . ?
Si2 C52 H52B 109.5 . . ?
H52A C52 H52B 109.5 . . ?
Si2 C52 H52C 109.5 . . ?
H52A C52 H52C 109.5 . . ?
H52B C52 H52C 109.5 . . ?
Si2 C53 H53A 109.5 . . ?
Si2 C53 H53B 109.5 . . ?
H53A C53 H53B 109.5 . . ?
Si2 C53 H53C 109.5 . . ?
H53A C53 H53C 109.5 . . ?
H53B C53 H53C 109.5 . . ?
Si2 C54 H54A 109.5 . . ?
Si2 C54 H54B 109.5 . . ?
H54A C54 H54B 109.5 . . ?
Si2 C54 H54C 109.5 . . ?
H54A C54 H54C 109.5 . . ?
H54B C54 H54C 109.5 . . ?
N3 Sb3 Cl5 104.78(10) . . ?
N3 Sb3 Cl6 97.68(11) . . ?
Cl5 Sb3 Cl6 89.90(5) . . ?
N3 Si3 C79 113.58(19) . . ?
N3 Si3 C81 109.06(19) . . ?
C79 Si3 C81 107.0(2) . . ?
N3 Si3 C80 109.59(19) . . ?
C79 Si3 C80 109.2(2) . . ?
C81 Si3 C80 108.2(2) . . ?
C55 N3 Si3 123.9(3) . . ?
C55 N3 Sb3 110.0(2) . . ?
Si3 N3 Sb3 126.08(18) . . ?
C60 C55 C56 118.2(4) . . ?
C60 C55 N3 121.8(4) . . ?
C56 C55 N3 119.9(4) . . ?
C57 C56 C55 120.2(4) . . ?
C57 C56 C61 116.8(4) . . ?
C55 C56 C61 122.9(4) . . ?
C58 C57 C56 121.4(4) . . ?
C58 C57 H57 119.3 . . ?
C56 C57 H57 119.3 . . ?
C57 C58 C59 118.7(4) . . ?
C57 C58 H58 120.6 . . ?
C59 C58 H58 120.6 . . ?
C58 C59 C60 122.1(5) . . ?
C58 C59 H59 118.9 . . ?
C60 C59 H59 118.9 . . ?
C59 C60 C55 119.1(4) . . ?
C59 C60 C67 115.8(4) . . ?
C55 C60 C67 125.1(4) . . ?
C66 C61 C62 119.0(4) . . ?
C66 C61 C56 119.9(4) . . ?
C62 C61 C56 120.8(4) . . ?
C63 C62 C61 118.8(4) . . ?
C63 C62 C73 119.8(4) . . ?
C61 C62 C73 121.5(4) . . ?
C62 C63 C64 122.8(4) . . ?
C62 C63 H63 118.6 . . ?
C64 C63 H63 118.6 . . ?
C63 C64 C65 118.0(5) . . ?
C63 C64 C74 120.9(5) . . ?
C65 C64 C74 121.0(5) . . ?
C66 C65 C64 121.5(4) . . ?
C66 C65 H65 119.3 . . ?
C64 C65 H65 119.3 . . ?
C65 C66 C61 119.8(4) . . ?
C65 C66 C75 118.5(4) . . ?
C61 C66 C75 121.7(5) . . ?
C72 C67 C68 118.7(4) . . ?
C72 C67 C60 120.9(4) . . ?
C68 C67 C60 119.8(4) . . ?
C69 C68 C67 120.2(4) . . ?
C69 C68 C76 117.2(4) . . ?
C67 C68 C76 122.5(4) . . ?
C70 C69 C68 121.3(4) . . ?
C70 C69 H69 119.3 . . ?
C68 C69 H69 119.3 . . ?
C69 C70 C71 118.0(4) . . ?
C69 C70 C77 121.1(5) . . ?
C71 C70 C77 120.9(5) . . ?
C70 C71 C72 122.7(4) . . ?
C70 C71 H71 118.7 . . ?
C72 C71 H71 118.7 . . ?
C71 C72 C67 118.9(4) . . ?
C71 C72 C78 117.4(4) . . ?
C67 C72 C78 123.7(4) . . ?
C62 C73 H73A 109.5 . . ?
C62 C73 H73B 109.5 . . ?
H73A C73 H73B 109.5 . . ?
C62 C73 H73C 109.5 . . ?
H73A C73 H73C 109.5 . . ?
H73B C73 H73C 109.5 . . ?
C64 C74 H74A 109.5 . . ?
C64 C74 H74B 109.5 . . ?
H74A C74 H74B 109.5 . . ?
C64 C74 H74C 109.5 . . ?
H74A C74 H74C 109.5 . . ?
H74B C74 H74C 109.5 . . ?
C66 C75 H75A 109.5 . . ?
C66 C75 H75B 109.5 . . ?
H75A C75 H75B 109.5 . . ?
C66 C75 H75C 109.5 . . ?
H75A C75 H75C 109.5 . . ?
H75B C75 H75C 109.5 . . ?
C68 C76 H76A 109.5 . . ?
C68 C76 H76B 109.5 . . ?
H76A C76 H76B 109.5 . . ?
C68 C76 H76C 109.5 . . ?
H76A C76 H76C 109.5 . . ?
H76B C76 H76C 109.5 . . ?
C70 C77 H77A 109.5 . . ?
C70 C77 H77B 109.5 . . ?
H77A C77 H77B 109.5 . . ?
C70 C77 H77C 109.5 . . ?
H77A C77 H77C 109.5 . . ?
H77B C77 H77C 109.5 . . ?
C72 C78 H78A 109.5 . . ?
C72 C78 H78B 109.5 . . ?
H78A C78 H78B 109.5 . . ?
C72 C78 H78C 109.5 . . ?
H78A C78 H78C 109.5 . . ?
H78B C78 H78C 109.5 . . ?
Si3 C79 H79A 109.5 . . ?
Si3 C79 H79B 109.5 . . ?
H79A C79 H79B 109.5 . . ?
Si3 C79 H79C 109.5 . . ?
H79A C79 H79C 109.5 . . ?
H79B C79 H79C 109.5 . . ?
Si3 C80 H80A 109.5 . . ?
Si3 C80 H80B 109.5 . . ?
H80A C80 H80B 109.5 . . ?
Si3 C80 H80C 109.5 . . ?
H80A C80 H80C 109.5 . . ?
H80B C80 H80C 109.5 . . ?
Si3 C81 H81A 109.5 . . ?
Si3 C81 H81B 109.5 . . ?
H81A C81 H81B 109.5 . . ?
Si3 C81 H81C 109.5 . . ?
H81A C81 H81C 109.5 . . ?
H81B C81 H81C 109.5 . . ?
N4 Sb4 Cl7 105.91(10) . . ?
N4 Sb4 Cl8 96.62(11) . . ?
Cl7 Sb4 Cl8 90.66(5) . . ?
N4 Si4 C107 109.75(19) . . ?
N4 Si4 C108 113.99(19) . . ?
C107 Si4 C108 106.7(2) . . ?
N4 Si4 C106 108.48(19) . . ?
C107 Si4 C106 108.4(2) . . ?
C108 Si4 C106 109.5(2) . . ?
C82 N4 Si4 122.7(3) . . ?
C82 N4 Sb4 110.7(2) . . ?
Si4 N4 Sb4 126.59(18) . . ?
C83 C82 C87 118.3(4) . . ?
C83 C82 N4 121.4(3) . . ?
C87 C82 N4 120.2(4) . . ?
C84 C83 C82 119.3(4) . . ?
C84 C83 C88 114.4(4) . . ?
C82 C83 C88 126.2(4) . . ?
C85 C84 C83 121.9(4) . . ?
C85 C84 H84 119.0 . . ?
C83 C84 H84 119.0 . . ?
C86 C85 C84 119.1(4) . . ?
C86 C85 H85 120.5 . . ?
C84 C85 H85 120.5 . . ?
C85 C86 C87 120.8(4) . . ?
C85 C86 H86 119.6 . . ?
C87 C86 H86 119.6 . . ?
C86 C87 C82 120.3(4) . . ?
C86 C87 C94 115.8(4) . . ?
C82 C87 C94 123.8(4) . . ?
C93 C88 C89 119.3(3) . . ?
C93 C88 C83 120.4(3) . . ?
C89 C88 C83 119.8(3) . . ?
C90 C89 C88 118.6(4) . . ?
C90 C89 C100 117.5(4) . . ?
C88 C89 C100 124.0(4) . . ?
C91 C90 C89 122.6(4) . . ?
C91 C90 H90 118.7 . . ?
C89 C90 H90 118.7 . . ?
C92 C91 C90 117.8(4) . . ?
C92 C91 C101 121.4(4) . . ?
C90 C91 C101 120.7(4) . . ?
C91 C92 C93 122.1(4) . . ?
C91 C92 H92 118.9 . . ?
C93 C92 H92 118.9 . . ?
C92 C93 C88 119.6(4) . . ?
C92 C93 C102 117.2(4) . . ?
C88 C93 C102 123.1(4) . . ?
C99 C94 C95 120.0(4) . . ?
C99 C94 C87 120.4(4) . . ?
C95 C94 C87 119.2(4) . . ?
C96 C95 C94 118.7(4) . . ?
C96 C95 C103 118.9(4) . . ?
C94 C95 C103 122.3(4) . . ?
C97 C96 C95 122.1(4) . . ?
C97 C96 H96 119.0 . . ?
C95 C96 H96 119.0 . . ?
C96 C97 C98 118.4(4) . . ?
C96 C97 C104 121.5(4) . . ?
C98 C97 C104 120.0(4) . . ?
C97 C98 C99 121.9(4) . . ?
C97 C98 H98 119.0 . . ?
C99 C98 H98 119.0 . . ?
C94 C99 C98 118.8(4) . . ?
C94 C99 C105 121.7(4) . . ?
C98 C99 C105 119.5(4) . . ?
C89 C100 H10A 109.5 . . ?
C89 C100 H10B 109.5 . . ?
H10A C100 H10B 109.5 . . ?
C89 C100 H10C 109.5 . . ?
H10A C100 H10C 109.5 . . ?
H10B C100 H10C 109.5 . . ?
C91 C101 H10D 109.5 . . ?
C91 C101 H10E 109.5 . . ?
H10D C101 H10E 109.5 . . ?
C91 C101 H10F 109.5 . . ?
H10D C101 H10F 109.5 . . ?
H10E C101 H10F 109.5 . . ?
C93 C102 H10G 109.5 . . ?
C93 C102 H10H 109.5 . . ?
H10G C102 H10H 109.5 . . ?
C93 C102 H10I 109.5 . . ?
H10G C102 H10I 109.5 . . ?
H10H C102 H10I 109.5 . . ?
C95 C103 H10J 109.5 . . ?
C95 C103 H10K 109.5 . . ?
H10J C103 H10K 109.5 . . ?
C95 C103 H10L 109.5 . . ?
H10J C103 H10L 109.5 . . ?
H10K C103 H10L 109.5 . . ?
C97 C104 H10M 109.5 . . ?
C97 C104 H10N 109.5 . . ?
H10M C104 H10N 109.5 . . ?
C97 C104 H10O 109.5 . . ?
H10M C104 H10O 109.5 . . ?
H10N C104 H10O 109.5 . . ?
C99 C105 H10P 109.5 . . ?
C99 C105 H10Q 109.5 . . ?
H10P C105 H10Q 109.5 . . ?
C99 C105 H10R 109.5 . . ?
H10P C105 H10R 109.5 . . ?
H10Q C105 H10R 109.5 . . ?
Si4 C106 H10S 109.5 . . ?
Si4 C106 H10T 109.5 . . ?
H10S C106 H10T 109.5 . . ?
Si4 C106 H10U 109.5 . . ?
H10S C106 H10U 109.5 . . ?
H10T C106 H10U 109.5 . . ?
Si4 C107 H10V 109.5 . . ?
Si4 C107 H10W 109.5 . . ?
H10V C107 H10W 109.5 . . ?
Si4 C107 H10X 109.5 . . ?
H10V C107 H10X 109.5 . . ?
H10W C107 H10X 109.5 . . ?
Si4 C108 H10Y 109.5 . . ?
Si4 C108 H10Z 109.5 . . ?
H10Y C108 H10Z 109.5 . . ?
Si4 C108 H11A 109.5 . . ?
H10Y C108 H11A 109.5 . . ?
H10Z C108 H11A 109.5 . . ?
C110 C109 C114 120.0 . . ?
C110 C109 H109 120.0 . . ?
C114 C109 H109 120.0 . . ?
C111 C110 C109 120.0 . . ?
C111 C110 H110 120.0 . . ?
C109 C110 H110 120.0 . . ?
C110 C111 C112 120.0 . . ?
C110 C111 H111 120.0 . . ?
C112 C111 H111 120.0 . . ?
C113 C112 C111 120.0 . . ?
C113 C112 H112 120.0 . . ?
C111 C112 H112 120.0 . . ?
C112 C113 C114 120.0 . . ?
C112 C113 H113 120.0 . . ?
C114 C113 H113 120.0 . . ?
C113 C114 C109 120.0 . . ?
C113 C114 H114 120.0 . . ?
C109 C114 H114 120.0 . . ?
C116 C115 C120 120.0 . . ?
C116 C115 H115 120.0 . . ?
C120 C115 H115 120.0 . . ?
C117 C116 C115 120.0 . . ?
C117 C116 H116 120.0 . . ?
C115 C116 H116 120.0 . . ?
C118 C117 C116 120.0 . . ?
C118 C117 H117 120.0 . . ?
C116 C117 H117 120.0 . . ?
C117 C118 C119 120.0 . . ?
C117 C118 H118 120.0 . . ?
C119 C118 H118 120.0 . . ?
C120 C119 C118 120.0 . . ?
C120 C119 H119 120.0 . . ?
C118 C119 H119 120.0 . . ?
C119 C120 C115 120.0 . . ?
C119 C120 H120 120.0 . . ?
C115 C120 H120 120.0 . . ?
C122 C121 C126 120.0 . . ?
C122 C121 H121 120.0 . . ?
C126 C121 H121 120.0 . . ?
C121 C122 C123 120.0 . . ?
C121 C122 H122 120.0 . . ?
C123 C122 H122 120.0 . . ?
C124 C123 C122 120.0 . . ?
C124 C123 H123 120.0 . . ?
C122 C123 H123 120.0 . . ?
C125 C124 C123 120.0 . . ?
C125 C124 H124 120.0 . . ?
C123 C124 H124 120.0 . . ?
C124 C125 C126 120.0 . . ?
C124 C125 H125 120.0 . . ?
C126 C125 H125 120.0 . . ?
C125 C126 C121 120.0 . . ?
C125 C126 H126 120.0 . . ?
C121 C126 H126 120.0 . . ?
 
loop_
 _geom_torsion_atom_site_label_1
 _geom_torsion_atom_site_label_2
 _geom_torsion_atom_site_label_3
 _geom_torsion_atom_site_label_4
 _geom_torsion
 _geom_torsion_site_symmetry_1
 _geom_torsion_site_symmetry_2
 _geom_torsion_site_symmetry_3
 _geom_torsion_site_symmetry_4
 _geom_torsion_publ_flag
C27 Si1 N1 C1 -140.5(4) . . . . ?
C25 Si1 N1 C1 -22.3(4) . . . . ?
C26 Si1 N1 C1 99.5(4) . . . . ?
C27 Si1 N1 Sb1 37.8(3) . . . . ?
C25 Si1 N1 Sb1 156.0(2) . . . . ?
C26 Si1 N1 Sb1 -82.2(3) . . . . ?
Cl1 Sb1 N1 C1 123.9(3) . . . . ?
Cl2 Sb1 N1 C1 -143.8(3) . . . . ?
Cl1 Sb1 N1 Si1 -54.6(2) . . . . ?
Cl2 Sb1 N1 Si1 37.7(2) . . . . ?
Si1 N1 C1 C2 -58.4(5) . . . . ?
Sb1 N1 C1 C2 123.0(4) . . . . ?
Si1 N1 C1 C6 122.9(4) . . . . ?
Sb1 N1 C1 C6 -55.7(4) . . . . ?
C6 C1 C2 C3 -5.5(6) . . . . ?
N1 C1 C2 C3 175.8(4) . . . . ?
C6 C1 C2 C7 170.8(4) . . . . ?
N1 C1 C2 C7 -7.9(6) . . . . ?
C1 C2 C3 C4 1.7(7) . . . . ?
C7 C2 C3 C4 -175.1(4) . . . . ?
C2 C3 C4 C5 3.1(7) . . . . ?
C3 C4 C5 C6 -3.9(7) . . . . ?
C4 C5 C6 C1 -0.1(7) . . . . ?
C4 C5 C6 C13 178.0(4) . . . . ?
C2 C1 C6 C5 4.8(6) . . . . ?
N1 C1 C6 C5 -176.5(4) . . . . ?
C2 C1 C6 C13 -173.1(4) . . . . ?
N1 C1 C6 C13 5.6(6) . . . . ?
C3 C2 C7 C12 111.5(5) . . . . ?
C1 C2 C7 C12 -64.9(6) . . . . ?
C3 C2 C7 C8 -58.5(5) . . . . ?
C1 C2 C7 C8 125.0(5) . . . . ?
C12 C7 C8 C9 1.9(6) . . . . ?
C2 C7 C8 C9 172.1(4) . . . . ?
C12 C7 C8 C19 -177.5(4) . . . . ?
C2 C7 C8 C19 -7.3(6) . . . . ?
C7 C8 C9 C10 0.2(7) . . . . ?
C19 C8 C9 C10 179.6(5) . . . . ?
C8 C9 C10 C11 -1.3(7) . . . . ?
C8 C9 C10 C20 179.8(5) . . . . ?
C9 C10 C11 C12 0.3(7) . . . . ?
C20 C10 C11 C12 179.2(5) . . . . ?
C10 C11 C12 C7 1.7(7) . . . . ?
C10 C11 C12 C21 -175.5(4) . . . . ?
C8 C7 C12 C11 -2.8(6) . . . . ?
C2 C7 C12 C11 -172.8(4) . . . . ?
C8 C7 C12 C21 174.3(4) . . . . ?
C2 C7 C12 C21 4.3(6) . . . . ?
C5 C6 C13 C14 100.4(5) . . . . ?
C1 C6 C13 C14 -81.7(5) . . . . ?
C5 C6 C13 C18 -72.1(5) . . . . ?
C1 C6 C13 C18 105.8(5) . . . . ?
C18 C13 C14 C15 -2.1(6) . . . . ?
C6 C13 C14 C15 -174.6(4) . . . . ?
C18 C13 C14 C22 176.5(4) . . . . ?
C6 C13 C14 C22 4.1(6) . . . . ?
C13 C14 C15 C16 -1.2(7) . . . . ?
C22 C14 C15 C16 -179.9(4) . . . . ?
C14 C15 C16 C17 2.9(7) . . . . ?
C14 C15 C16 C23 -176.5(4) . . . . ?
C15 C16 C17 C18 -1.2(6) . . . . ?
C23 C16 C17 C18 178.1(4) . . . . ?
C16 C17 C18 C13 -2.0(6) . . . . ?
C16 C17 C18 C24 176.5(4) . . . . ?
C14 C13 C18 C17 3.7(6) . . . . ?
C6 C13 C18 C17 176.3(4) . . . . ?
C14 C13 C18 C24 -174.8(4) . . . . ?
C6 C13 C18 C24 -2.2(6) . . . . ?
C54 Si2 N2 C28 137.8(4) . . . . ?
C52 Si2 N2 C28 -103.1(4) . . . . ?
C53 Si2 N2 C28 19.9(4) . . . . ?
C54 Si2 N2 Sb2 -42.3(3) . . . . ?
C52 Si2 N2 Sb2 76.8(3) . . . . ?
C53 Si2 N2 Sb2 -160.1(2) . . . . ?
Cl3 Sb2 N2 C28 -125.4(2) . . . . ?
Cl4 Sb2 N2 C28 142.5(3) . . . . ?
Cl3 Sb2 N2 Si2 54.6(2) . . . . ?
Cl4 Sb2 N2 Si2 -37.5(2) . . . . ?
Si2 N2 C28 C29 -121.4(4) . . . . ?
Sb2 N2 C28 C29 58.6(4) . . . . ?
Si2 N2 C28 C33 60.5(5) . . . . ?
Sb2 N2 C28 C33 -119.5(4) . . . . ?
C33 C28 C29 C30 -4.7(6) . . . . ?
N2 C28 C29 C30 177.1(4) . . . . ?
C33 C28 C29 C34 172.2(4) . . . . ?
N2 C28 C29 C34 -6.0(6) . . . . ?
C28 C29 C30 C31 0.4(7) . . . . ?
C34 C29 C30 C31 -176.7(4) . . . . ?
C29 C30 C31 C32 3.2(8) . . . . ?
C30 C31 C32 C33 -2.4(8) . . . . ?
C31 C32 C33 C28 -1.9(7) . . . . ?
C31 C32 C33 C40 175.1(4) . . . . ?
C29 C28 C33 C32 5.4(6) . . . . ?
N2 C28 C33 C32 -176.4(4) . . . . ?
C29 C28 C33 C40 -171.5(4) . . . . ?
N2 C28 C33 C40 6.7(6) . . . . ?
C30 C29 C34 C39 72.5(5) . . . . ?
C28 C29 C34 C39 -104.6(5) . . . . ?
C30 C29 C34 C35 -101.3(5) . . . . ?
C28 C29 C34 C35 81.6(5) . . . . ?
C39 C34 C35 C36 2.2(6) . . . . ?
C29 C34 C35 C36 176.0(4) . . . . ?
C39 C34 C35 C46 -176.7(4) . . . . ?
C29 C34 C35 C46 -2.9(6) . . . . ?
C34 C35 C36 C37 -0.2(6) . . . . ?
C46 C35 C36 C37 178.7(4) . . . . ?
C35 C36 C37 C38 -1.0(7) . . . . ?
C35 C36 C37 C47 -178.8(4) . . . . ?
C36 C37 C38 C39 0.1(7) . . . . ?
C47 C37 C38 C39 177.9(4) . . . . ?
C37 C38 C39 C34 1.9(7) . . . . ?
C37 C38 C39 C48 -176.0(4) . . . . ?
C35 C34 C39 C38 -3.0(6) . . . . ?
C29 C34 C39 C38 -176.9(4) . . . . ?
C35 C34 C39 C48 174.8(4) . . . . ?
C29 C34 C39 C48 0.9(6) . . . . ?
C32 C33 C40 C45 63.0(6) . . . . ?
C28 C33 C40 C45 -120.0(5) . . . . ?
C32 C33 C40 C41 -111.0(5) . . . . ?
C28 C33 C40 C41 65.9(6) . . . . ?
C45 C40 C41 C42 5.3(7) . . . . ?
C33 C40 C41 C42 179.5(4) . . . . ?
C45 C40 C41 C49 -172.8(4) . . . . ?
C33 C40 C41 C49 1.4(7) . . . . ?
C40 C41 C42 C43 -1.0(7) . . . . ?
C49 C41 C42 C43 177.2(5) . . . . ?
C41 C42 C43 C44 -2.6(7) . . . . ?
C41 C42 C43 C50 178.4(5) . . . . ?
C42 C43 C44 C45 1.9(8) . . . . ?
C50 C43 C44 C45 -179.1(5) . . . . ?
C43 C44 C45 C40 2.4(7) . . . . ?
C43 C44 C45 C51 -177.2(5) . . . . ?
C41 C40 C45 C44 -5.9(7) . . . . ?
C33 C40 C45 C44 179.9(4) . . . . ?
C41 C40 C45 C51 173.7(4) . . . . ?
C33 C40 C45 C51 -0.5(7) . . . . ?
C79 Si3 N3 C55 -101.4(4) . . . . ?
C81 Si3 N3 C55 139.4(3) . . . . ?
C80 Si3 N3 C55 21.1(4) . . . . ?
C79 Si3 N3 Sb3 78.6(3) . . . . ?
C81 Si3 N3 Sb3 -40.6(3) . . . . ?
C80 Si3 N3 Sb3 -159.0(2) . . . . ?
Cl5 Sb3 N3 C55 -125.2(2) . . . . ?
Cl6 Sb3 N3 C55 142.9(2) . . . . ?
Cl5 Sb3 N3 Si3 54.8(2) . . . . ?
Cl6 Sb3 N3 Si3 -37.1(2) . . . . ?
Si3 N3 C55 C60 59.7(5) . . . . ?
Sb3 N3 C55 C60 -120.2(3) . . . . ?
Si3 N3 C55 C56 -122.2(3) . . . . ?
Sb3 N3 C55 C56 57.8(4) . . . . ?
C60 C55 C56 C57 -3.6(6) . . . . ?
N3 C55 C56 C57 178.3(4) . . . . ?
C60 C55 C56 C61 175.1(4) . . . . ?
N3 C55 C56 C61 -3.0(6) . . . . ?
C55 C56 C57 C58 0.1(7) . . . . ?
C61 C56 C57 C58 -178.7(4) . . . . ?
C56 C57 C58 C59 2.6(7) . . . . ?
C57 C58 C59 C60 -1.8(7) . . . . ?
C58 C59 C60 C55 -1.7(7) . . . . ?
C58 C59 C60 C67 176.8(4) . . . . ?
C56 C55 C60 C59 4.3(6) . . . . ?
N3 C55 C60 C59 -177.6(4) . . . . ?
C56 C55 C60 C67 -174.1(4) . . . . ?
N3 C55 C60 C67 4.0(6) . . . . ?
C57 C56 C61 C66 71.9(5) . . . . ?
C55 C56 C61 C66 -106.8(5) . . . . ?
C57 C56 C61 C62 -102.0(5) . . . . ?
C55 C56 C61 C62 79.2(5) . . . . ?
C66 C61 C62 C63 2.6(6) . . . . ?
C56 C61 C62 C63 176.5(4) . . . . ?
C66 C61 C62 C73 -176.3(4) . . . . ?
C56 C61 C62 C73 -2.3(6) . . . . ?
C61 C62 C63 C64 -0.5(7) . . . . ?
C73 C62 C63 C64 178.3(4) . . . . ?
C62 C63 C64 C65 -0.9(7) . . . . ?
C62 C63 C64 C74 -179.7(4) . . . . ?
C63 C64 C65 C66 0.1(7) . . . . ?
C74 C64 C65 C66 179.0(4) . . . . ?
C64 C65 C66 C61 2.0(7) . . . . ?
C64 C65 C66 C75 -175.7(4) . . . . ?
C62 C61 C66 C65 -3.3(6) . . . . ?
C56 C61 C66 C65 -177.3(4) . . . . ?
C62 C61 C66 C75 174.3(4) . . . . ?
C56 C61 C66 C75 0.3(6) . . . . ?
C59 C60 C67 C72 61.8(6) . . . . ?
C55 C60 C67 C72 -119.7(5) . . . . ?
C59 C60 C67 C68 -110.0(5) . . . . ?
C55 C60 C67 C68 68.4(6) . . . . ?
C72 C67 C68 C69 3.0(6) . . . . ?
C60 C67 C68 C69 175.0(4) . . . . ?
C72 C67 C68 C76 -174.3(4) . . . . ?
C60 C67 C68 C76 -2.2(6) . . . . ?
C67 C68 C69 C70 -0.7(7) . . . . ?
C76 C68 C69 C70 176.7(4) . . . . ?
C68 C69 C70 C71 -0.3(7) . . . . ?
C68 C69 C70 C77 -178.6(4) . . . . ?
C69 C70 C71 C72 -1.0(7) . . . . ?
C77 C70 C71 C72 177.3(5) . . . . ?
C70 C71 C72 C67 3.3(7) . . . . ?
C70 C71 C72 C78 -175.3(4) . . . . ?
C68 C67 C72 C71 -4.2(6) . . . . ?
C60 C67 C72 C71 -176.1(4) . . . . ?
C68 C67 C72 C78 174.3(4) . . . . ?
C60 C67 C72 C78 2.4(7) . . . . ?
C107 Si4 N4 C82 -139.9(3) . . . . ?
C108 Si4 N4 C82 100.5(3) . . . . ?
C106 Si4 N4 C82 -21.7(4) . . . . ?
C107 Si4 N4 Sb4 37.5(3) . . . . ?
C108 Si4 N4 Sb4 -82.0(3) . . . . ?
C106 Si4 N4 Sb4 155.8(2) . . . . ?
Cl7 Sb4 N4 C82 123.9(2) . . . . ?
Cl8 Sb4 N4 C82 -143.5(2) . . . . ?
Cl7 Sb4 N4 Si4 -53.8(2) . . . . ?
Cl8 Sb4 N4 Si4 38.8(2) . . . . ?
Si4 N4 C82 C83 -58.5(5) . . . . ?
Sb4 N4 C82 C83 123.6(3) . . . . ?
Si4 N4 C82 C87 121.9(3) . . . . ?
Sb4 N4 C82 C87 -55.9(4) . . . . ?
C87 C82 C83 C84 -5.2(6) . . . . ?
N4 C82 C83 C84 175.3(4) . . . . ?
C87 C82 C83 C88 170.9(4) . . . . ?
N4 C82 C83 C88 -8.7(6) . . . . ?
C82 C83 C84 C85 2.1(6) . . . . ?
C88 C83 C84 C85 -174.4(4) . . . . ?
C83 C84 C85 C86 2.0(7) . . . . ?
C84 C85 C86 C87 -2.9(7) . . . . ?
C85 C86 C87 C82 -0.3(6) . . . . ?
C85 C86 C87 C94 176.9(4) . . . . ?
C83 C82 C87 C86 4.4(6) . . . . ?
N4 C82 C87 C86 -176.1(4) . . . . ?
C83 C82 C87 C94 -172.6(4) . . . . ?
N4 C82 C87 C94 6.9(6) . . . . ?
C84 C83 C88 C93 113.0(4) . . . . ?
C82 C83 C88 C93 -63.2(6) . . . . ?
C84 C83 C88 C89 -59.1(5) . . . . ?
C82 C83 C88 C89 124.6(4) . . . . ?
C93 C88 C89 C90 2.0(6) . . . . ?
C83 C88 C89 C90 174.3(4) . . . . ?
C93 C88 C89 C100 -176.5(4) . . . . ?
C83 C88 C89 C100 -4.3(6) . . . . ?
C88 C89 C90 C91 -0.4(7) . . . . ?
C100 C89 C90 C91 178.2(4) . . . . ?
C89 C90 C91 C92 -0.4(7) . . . . ?
C89 C90 C91 C101 -178.8(5) . . . . ?
C90 C91 C92 C93 -0.4(7) . . . . ?
C101 C91 C92 C93 178.0(4) . . . . ?
C91 C92 C93 C88 2.0(7) . . . . ?
C91 C92 C93 C102 -175.0(4) . . . . ?
C89 C88 C93 C92 -2.8(6) . . . . ?
C83 C88 C93 C92 -175.0(4) . . . . ?
C89 C88 C93 C102 174.0(4) . . . . ?
C83 C88 C93 C102 1.9(6) . . . . ?
C86 C87 C94 C99 100.4(5) . . . . ?
C82 C87 C94 C99 -82.5(5) . . . . ?
C86 C87 C94 C95 -72.7(5) . . . . ?
C82 C87 C94 C95 104.4(5) . . . . ?
C99 C94 C95 C96 3.3(6) . . . . ?
C87 C94 C95 C96 176.4(4) . . . . ?
C99 C94 C95 C103 -173.6(4) . . . . ?
C87 C94 C95 C103 -0.5(6) . . . . ?
C94 C95 C96 C97 -1.1(6) . . . . ?
C103 C95 C96 C97 175.9(4) . . . . ?
C95 C96 C97 C98 -1.4(6) . . . . ?
C95 C96 C97 C104 177.8(4) . . . . ?
C96 C97 C98 C99 1.9(6) . . . . ?
C104 C97 C98 C99 -177.3(4) . . . . ?
C95 C94 C99 C98 -2.9(6) . . . . ?
C87 C94 C99 C98 -175.9(4) . . . . ?
C95 C94 C99 C105 177.3(4) . . . . ?
C87 C94 C99 C105 4.3(6) . . . . ?
C97 C98 C99 C94 0.2(6) . . . . ?
C97 C98 C99 C105 -179.9(4) . . . . ?
C114 C109 C110 C111 0.0 . . . . ?
C109 C110 C111 C112 0.0 . . . . ?
C110 C111 C112 C113 0.0 . . . . ?
C111 C112 C113 C114 0.0 . . . . ?
C112 C113 C114 C109 0.0 . . . . ?
C110 C109 C114 C113 0.0 . . . . ?
C120 C115 C116 C117 0.0 . . . . ?
C115 C116 C117 C118 0.0 . . . . ?
C116 C117 C118 C119 0.0 . . . . ?
C117 C118 C119 C120 0.0 . . . . ?
C118 C119 C120 C115 0.0 . . . . ?
C116 C115 C120 C119 0.0 . . . . ?
C126 C121 C122 C123 0.0 . . . . ?
C121 C122 C123 C124 0.0 . . . . ?
C122 C123 C124 C125 0.0 . . . . ?
C123 C124 C125 C126 0.0 . . . . ?
C124 C125 C126 C121 0.0 . . . . ?
C122 C121 C126 C125 0.0 . . . . ?
 
_diffrn_measured_fraction_theta_max    0.970
_diffrn_reflns_theta_full              29.14
_diffrn_measured_fraction_theta_full   0.970
_refine_diff_density_max    1.286
_refine_diff_density_min   -0.720
_refine_diff_density_rms    0.115

#=============================================================================

data_is_ch06b
 
_audit_author_name                'Villinger, A.' 
_audit_creation_method            SHELXL-97 

#==============================================================================

# CHEMICAL DATA

_chemical_name_systematic
;
 ?
;
_chemical_name_common             ?
_chemical_melting_point           ?
_chemical_formula_moiety          'C27 H34 Cl2 N Sb Si , 0.5(C7 H8)'
_chemical_formula_sum
 'C30.50 H38 Cl2 N Sb Si'
_chemical_formula_weight          639.36
 
loop_
 _atom_type_symbol
 _atom_type_description
 _atom_type_scat_dispersion_real
 _atom_type_scat_dispersion_imag
 _atom_type_scat_source
 'C'  'C'   0.0033   0.0016
 'International Tables Vol C Tables 4.2.6.8 and 6.1.1.4'
 'H'  'H'   0.0000   0.0000
 'International Tables Vol C Tables 4.2.6.8 and 6.1.1.4'
 'N'  'N'   0.0061   0.0033
 'International Tables Vol C Tables 4.2.6.8 and 6.1.1.4'
 'Si'  'Si'   0.0817   0.0704
 'International Tables Vol C Tables 4.2.6.8 and 6.1.1.4'
 'Cl'  'Cl'   0.1484   0.1585
 'International Tables Vol C Tables 4.2.6.8 and 6.1.1.4'
 'Sb'  'Sb'  -0.5866   1.5461
 'International Tables Vol C Tables 4.2.6.8 and 6.1.1.4'
 
#==============================================================================

# CRYSTAL DATA
 
_symmetry_cell_setting            triclinic
_symmetry_space_group_name_H-M    'P -1'
_symmetry_space_group_name_Hall   '-P 1'
_symmetry_Int_Tables_number       2
 
loop_
 _symmetry_equiv_pos_as_xyz
 'x, y, z'
 '-x, -y, -z'
 
_cell_length_a                    16.8457(7)
_cell_length_b                    19.0016(6)
_cell_length_c                    19.5364(8)
_cell_angle_alpha                 90.4840(10)
_cell_angle_beta                  103.100(2)
_cell_angle_gamma                 97.5510(10)
_cell_volume                      6033.2(4)
_cell_formula_units_Z             8
_cell_measurement_temperature     173(2)
_cell_measurement_reflns_used     9262
_cell_measurement_theta_min       4.723
_cell_measurement_theta_max       53.343
 
_exptl_crystal_description        needle
_exptl_crystal_colour             colourless
_exptl_crystal_size_max           0.66
_exptl_crystal_size_mid           0.08
_exptl_crystal_size_min           0.05
_exptl_crystal_density_meas       ?
_exptl_crystal_density_diffrn     1.408
_exptl_crystal_density_method     'not measured'
_exptl_crystal_F_000              2616
_exptl_absorpt_coefficient_mu     1.151
_exptl_absorpt_correction_type    multi-scan
_exptl_absorpt_correction_T_min   0.5171
_exptl_absorpt_correction_T_max   0.9447
_exptl_absorpt_process_details    '(SADABS; Sheldrick, 2004)'

#==============================================================================

# EXPERIMENTAL DATA
 
_exptl_special_details
;
 ?
;
 
_diffrn_ambient_temperature       173(2)
_diffrn_radiation_wavelength      0.71073
_diffrn_radiation_type            MoK\a
_diffrn_radiation_source          'sealed tube'
_diffrn_radiation_monochromator   graphite
_diffrn_measurement_device_type   'Bruker Apex Kappa II-CCD-diffractometer'
_diffrn_measurement_method        'phi and psi scans'
_diffrn_detector_area_resol_mean  ?
_diffrn_standards_number          ?
_diffrn_standards_interval_count  ?
_diffrn_standards_interval_time   ?
_diffrn_standards_decay_%         ?
_diffrn_reflns_number             114501
_diffrn_reflns_av_R_equivalents   0.0646
_diffrn_reflns_av_sigmaI/netI     0.0866
_diffrn_reflns_limit_h_min        -22
_diffrn_reflns_limit_h_max        22
_diffrn_reflns_limit_k_min        -25
_diffrn_reflns_limit_k_max        20
_diffrn_reflns_limit_l_min        -26
_diffrn_reflns_limit_l_max        26
_diffrn_reflns_theta_min          1.07
_diffrn_reflns_theta_max          29.00
_reflns_number_total              31474
_reflns_number_gt                 18474
_reflns_threshold_expression      >2\s(I)
 
_computing_data_collection        'Bruker Apex v2.0-2'
_computing_cell_refinement        'Bruker Apex v2.0-2'
_computing_data_reduction         'Bruker SAINT'
_computing_structure_solution     'SHELXS-97 (Sheldrick, 1997)'
_computing_structure_refinement   'SHELXL-97 (Sheldrick, 1997)'
_computing_molecular_graphics     'ORTEP-3 (Farrugia, 1997)' 
_computing_publication_material   'SHELXL-97'

#==============================================================================

# REFINEMENT DATA 

_refine_special_details
;
 All H atoms  were positioned geometrically and refined using a 
 riding model , with C---H = 0.98 (methyl groups), 0.99\%A (methylene groups), 
 1.00\%A (methine groups) or 0.95 \%A (aryl CH) and with <i>U</i>~iso~(H) = 
 1.5 times <i>U</i>~eq~(C) (methyl groups) or with <i>U</i>~iso~(H) = 1.2 times 
 <i>U</i>~eq~(C) (methylene  groups, aryl CH, methine groups). Torsion angles 
 of all methyl groups were allowed to refine(except the minor part of 
 disordered Si-Me and Sb-Me groups which were refined as idealized, staggered 
 methyl groups). All Si---C, Si---Cl, Sb---C and Sb---Cl distances of 
 disordered groups were restrained to be equal for both parts (esd 0.02) but 
 refined freely. The Sb---C and Sb---Cl distances of the atom pairs Sb1/C25b, 
 Sb1/Cl1a, Sb3/C79b and Sb3/Cl5a were restrained to 1.15 and 2.40\%A 
 (esd 0.001). The C---C distances of the methyl groups of all parts of 
 disordered toluene molecules were restrained to be equal (esd 0.04) but 
 refined freely. The C---C distance of the the atom pair C116/C117 (methyl 
 group of the disordered toluene molecule) was restrained to 1.5\%A 
 (esd 0.02). Both toluene molecules were found to be disordered and were 
 split in two parts and three parts respectively. The occupancy of each part 
 was refined freely. The Uij of several C atoms of both 
 disoredred toluene molecules were restrained to be equal but refined 
 freely. The Uij of disordered Me/Cl pairs were restrained to be equal but 
 refined freely. 
 
 Refinement of F^2^ against ALL reflections.  The weighted R-factor wR and
 goodness of fit S are based on F^2^, conventional R-factors R are based
 on F, with F set to zero for negative F^2^. The threshold expression of
 F^2^ > 2\s(F^2^) is used only for calculating R-factors(gt) etc. and is
 not relevant to the choice of reflections for refinement.  R-factors based
 on F^2^ are statistically about twice as large as those based on F, and R-
 factors based on ALL data will be even larger.
;
 
_refine_ls_structure_factor_coef  Fsqd
_refine_ls_matrix_type            full
_refine_ls_weighting_scheme       calc
_refine_ls_weighting_details
 'calc w=1/[\s^2^(Fo^2^)+(0.0288P)^2^+2.6835P] where P=(Fo^2^+2Fc^2^)/3'
_atom_sites_solution_primary      direct
_atom_sites_solution_secondary    difmap
_atom_sites_solution_hydrogens    geom
_refine_ls_hydrogen_treatment     constr
_refine_ls_extinction_method      none
_refine_ls_extinction_coef        ?
_refine_ls_number_reflns          31474
_refine_ls_number_parameters      1374
_refine_ls_number_restraints      39
_refine_ls_R_factor_all           0.1016
_refine_ls_R_factor_gt            0.0417
_refine_ls_wR_factor_ref          0.0915
_refine_ls_wR_factor_gt           0.0724
_refine_ls_goodness_of_fit_ref    0.992
_refine_ls_restrained_S_all       0.993
_refine_ls_shift/su_max           0.003
_refine_ls_shift/su_mean          0.000

#==============================================================================

# ATOMIC COORDINATES AND DISPLACEMENT PARAMETERS
 
loop_
 _atom_site_label
 _atom_site_type_symbol
 _atom_site_fract_x
 _atom_site_fract_y
 _atom_site_fract_z
 _atom_site_U_iso_or_equiv
 _atom_site_adp_type
 _atom_site_occupancy
 _atom_site_symmetry_multiplicity
 _atom_site_calc_flag
 _atom_site_refinement_flags
 _atom_site_disorder_assembly
 _atom_site_disorder_group
Sb1 Sb 0.668111(15) 0.708683(12) 0.542148(12) 0.02456(6) Uani 1 1 d D . .
Si1 Si 0.86144(6) 0.70181(5) 0.63477(5) 0.0256(2) Uani 1 1 d D . .
Cl1A Cl 0.74873(7) 0.72058(8) 0.45462(5) 0.0332(4) Uani 0.942(3) 1 d PD A 1
C25A C 0.6862(6) 0.8227(3) 0.5589(5) 0.0211(13) Uani 0.942(3) 1 d P A 1
H25A H 0.7157 0.8351 0.6076 0.032 Uiso 0.942(3) 1 calc PR A 1
H25B H 0.6327 0.8400 0.5498 0.032 Uiso 0.942(3) 1 calc PR A 1
H25C H 0.7185 0.8446 0.5268 0.032 Uiso 0.942(3) 1 calc PR A 1
Cl1B Cl 0.681(3) 0.8337(11) 0.568(2) 0.0211(13) Uani 0.058(3) 1 d PD A 2
C25B C 0.741(3) 0.730(7) 0.465(2) 0.0332(4) Uani 0.058(3) 1 d PD A 2
H25D H 0.7048 0.7377 0.4199 0.050 Uiso 0.058(3) 1 calc PR A 2
H25E H 0.7695 0.6890 0.4606 0.050 Uiso 0.058(3) 1 calc PR A 2
H25F H 0.7811 0.7722 0.4805 0.050 Uiso 0.058(3) 1 calc PR A 2
Cl2A Cl 0.91370(19) 0.68507(16) 0.73804(9) 0.0358(5) Uani 0.820(4) 1 d PD A 1
C26A C 0.8796(14) 0.7986(6) 0.6267(12) 0.0397(15) Uani 0.820(4) 1 d PD A 1
H26A H 0.8488 0.8216 0.6554 0.060 Uiso 0.820(4) 1 calc PR A 1
H26B H 0.8611 0.8102 0.5774 0.060 Uiso 0.820(4) 1 calc PR A 1
H26C H 0.9384 0.8155 0.6431 0.060 Uiso 0.820(4) 1 calc PR A 1
Cl2B Cl 0.8846(16) 0.8087(7) 0.6305(14) 0.0397(15) Uani 0.180(4) 1 d PD A 2
C26B C 0.905(4) 0.692(3) 0.7288(13) 0.0358(5) Uani 0.180(4) 1 d PD A 2
H26D H 0.8727 0.7144 0.7566 0.054 Uiso 0.180(4) 1 calc PR A 2
H26E H 0.9622 0.7162 0.7410 0.054 Uiso 0.180(4) 1 calc PR A 2
H26F H 0.9042 0.6420 0.7388 0.054 Uiso 0.180(4) 1 calc PR A 2
N1 N 0.75650(16) 0.67209(13) 0.61977(14) 0.0203(6) Uani 1 1 d . A .
C1 C 0.7207(2) 0.61844(16) 0.65948(16) 0.0200(7) Uani 1 1 d . . .
C2 C 0.7466(2) 0.55045(16) 0.66683(17) 0.0206(7) Uani 1 1 d . A .
C3 C 0.7142(2) 0.50349(17) 0.71149(18) 0.0263(8) Uani 1 1 d . . .
H3 H 0.7331 0.4585 0.7180 0.032 Uiso 1 1 calc R A .
C4 C 0.6564(2) 0.51954(18) 0.74624(19) 0.0326(9) Uani 1 1 d . A .
H4 H 0.6376 0.4872 0.7778 0.039 Uiso 1 1 calc R . .
C5 C 0.6260(2) 0.58385(18) 0.73448(18) 0.0298(9) Uani 1 1 d . . .
H5 H 0.5834 0.5944 0.7558 0.036 Uiso 1 1 calc R A .
C6 C 0.6573(2) 0.63278(16) 0.69181(17) 0.0225(8) Uani 1 1 d . A .
C7 C 0.8027(2) 0.52063(16) 0.62810(17) 0.0205(7) Uani 1 1 d . . .
C8 C 0.7793(2) 0.50982(16) 0.55465(17) 0.0216(7) Uani 1 1 d . A .
C9 C 0.8286(2) 0.47644(17) 0.52005(18) 0.0265(8) Uani 1 1 d . . .
H9 H 0.8134 0.4709 0.4702 0.032 Uiso 1 1 calc R A .
C10 C 0.8991(2) 0.45114(17) 0.5558(2) 0.0293(8) Uani 1 1 d . A .
C11 C 0.9200(2) 0.46040(17) 0.62845(19) 0.0269(8) Uani 1 1 d . . .
H11 H 0.9678 0.4426 0.6539 0.032 Uiso 1 1 calc R A .
C12 C 0.8741(2) 0.49454(16) 0.66554(17) 0.0230(8) Uani 1 1 d . A .
C13 C 0.6179(2) 0.69998(17) 0.68119(17) 0.0223(8) Uani 1 1 d . . .
C14 C 0.5382(2) 0.69719(17) 0.63771(19) 0.0278(8) Uani 1 1 d . A .
C15 C 0.5002(2) 0.75875(18) 0.63041(19) 0.0299(9) Uani 1 1 d . . .
H15 H 0.4472 0.7573 0.6000 0.036 Uiso 1 1 calc R A .
C16 C 0.5381(2) 0.82186(18) 0.6666(2) 0.0310(9) Uani 1 1 d . A .
C17 C 0.6142(2) 0.82230(18) 0.71174(19) 0.0304(9) Uani 1 1 d . . .
H17 H 0.6394 0.8648 0.7382 0.036 Uiso 1 1 calc R A .
C18 C 0.6555(2) 0.76307(17) 0.71998(18) 0.0271(8) Uani 1 1 d . A .
C19 C 0.7003(2) 0.52978(18) 0.51030(18) 0.0282(8) Uani 1 1 d . . .
H19A H 0.7122 0.5742 0.4872 0.042 Uiso 1 1 calc R A .
H19B H 0.6623 0.5361 0.5404 0.042 Uiso 1 1 calc R . .
H19C H 0.6752 0.4919 0.4746 0.042 Uiso 1 1 calc R . .
C20 C 0.9503(3) 0.4132(2) 0.5174(2) 0.0456(11) Uani 1 1 d . . .
H20A H 0.9314 0.3620 0.5149 0.068 Uiso 1 1 calc R A .
H20B H 1.0082 0.4223 0.5426 0.068 Uiso 1 1 calc R . .
H20C H 0.9445 0.4306 0.4697 0.068 Uiso 1 1 calc R . .
C21 C 0.9028(2) 0.50086(18) 0.74494(18) 0.0320(9) Uani 1 1 d . . .
H21A H 0.8781 0.5388 0.7631 0.048 Uiso 1 1 calc R A .
H21B H 0.9628 0.5121 0.7580 0.048 Uiso 1 1 calc R . .
H21C H 0.8859 0.4558 0.7650 0.048 Uiso 1 1 calc R . .
C22 C 0.4907(2) 0.62881(18) 0.6006(2) 0.0315(9) Uani 1 1 d . . .
H22A H 0.4659 0.6001 0.6337 0.047 Uiso 1 1 calc R A .
H22B H 0.5283 0.6021 0.5828 0.047 Uiso 1 1 calc R . .
H22C H 0.4473 0.6401 0.5612 0.047 Uiso 1 1 calc R . .
C23 C 0.4976(3) 0.88858(19) 0.6568(2) 0.0419(10) Uani 1 1 d . . .
H23A H 0.4998 0.9105 0.7028 0.063 Uiso 1 1 calc R A .
H23B H 0.4401 0.8765 0.6313 0.063 Uiso 1 1 calc R . .
H23C H 0.5266 0.9220 0.6298 0.063 Uiso 1 1 calc R . .
C24 C 0.7381(2) 0.76688(19) 0.7700(2) 0.0358(9) Uani 1 1 d . . .
H24A H 0.7589 0.8165 0.7852 0.054 Uiso 1 1 calc R A .
H24B H 0.7765 0.7476 0.7465 0.054 Uiso 1 1 calc R . .
H24C H 0.7327 0.7391 0.8112 0.054 Uiso 1 1 calc R . .
Sb2 Sb 0.641768(15) 0.214260(12) 0.763214(12) 0.02476(6) Uani 1 1 d D . .
Si2 Si 0.83132(7) 0.19816(5) 0.73926(6) 0.0329(3) Uani 1 1 d D . .
Cl3A Cl 0.72320(10) 0.20758(8) 0.88073(5) 0.0338(4) Uani 0.955(4) 1 d PD B 1
C52A C 0.6717(5) 0.3272(3) 0.7657(4) 0.0269(12) Uani 0.955(4) 1 d PD B 1
H52A H 0.7030 0.3440 0.8129 0.040 Uiso 0.955(4) 1 calc PR B 1
H52B H 0.6210 0.3490 0.7539 0.040 Uiso 0.955(4) 1 calc PR B 1
H52C H 0.7050 0.3405 0.7315 0.040 Uiso 0.955(4) 1 calc PR B 1
Cl3B Cl 0.668(3) 0.3409(10) 0.777(2) 0.0269(12) Uani 0.045(4) 1 d PD B 2
C52B C 0.717(9) 0.197(9) 0.864(4) 0.0338(4) Uani 0.045(4) 1 d PD B 2
H52D H 0.6916 0.2121 0.9009 0.051 Uiso 0.045(4) 1 calc PR B 2
H52E H 0.7716 0.2238 0.8690 0.051 Uiso 0.045(4) 1 calc PR B 2
H52F H 0.7217 0.1459 0.8677 0.051 Uiso 0.045(4) 1 calc PR B 2
Cl4A Cl 0.8814(4) 0.1822(3) 0.6571(3) 0.0438(7) Uani 0.583(4) 1 d PD B 1
C54A C 0.861(2) 0.2949(9) 0.7616(17) 0.0528(9) Uani 0.583(4) 1 d PD B 1
H54A H 0.8342 0.3221 0.7226 0.079 Uiso 0.583(4) 1 calc PR B 1
H54B H 0.9206 0.3069 0.7699 0.079 Uiso 0.583(4) 1 calc PR B 1
H54C H 0.8429 0.3067 0.8042 0.079 Uiso 0.583(4) 1 calc PR B 1
Cl4B Cl 0.8644(7) 0.3030(3) 0.7635(6) 0.0528(9) Uani 0.417(4) 1 d PD B 2
C54B C 0.877(2) 0.188(2) 0.6613(16) 0.0438(7) Uani 0.417(4) 1 d PD B 2
H54D H 0.8479 0.2141 0.6222 0.066 Uiso 0.417(4) 1 calc PR B 2
H54E H 0.8709 0.1380 0.6475 0.066 Uiso 0.417(4) 1 calc PR B 2
H54F H 0.9352 0.2080 0.6736 0.066 Uiso 0.417(4) 1 calc PR B 2
N2 N 0.72482(17) 0.17841(13) 0.71243(14) 0.0216(6) Uani 1 1 d . B .
C27 C 0.9209(2) 0.66113(19) 0.58000(19) 0.0318(9) Uani 1 1 d D A .
H27A H 0.9220 0.6110 0.5909 0.048 Uiso 1 1 calc R . .
H27B H 0.9772 0.6860 0.5899 0.048 Uiso 1 1 calc R . .
H27C H 0.8949 0.6648 0.5302 0.048 Uiso 1 1 calc R . .
C28 C 0.6833(2) 0.13202(17) 0.65272(18) 0.0237(8) Uani 1 1 d . . .
C29 C 0.6235(2) 0.15719(17) 0.59845(18) 0.0261(8) Uani 1 1 d . B .
C30 C 0.5857(2) 0.11365(19) 0.53900(19) 0.0348(9) Uani 1 1 d . . .
H30 H 0.5461 0.1309 0.5027 0.042 Uiso 1 1 calc R B .
C31 C 0.6048(2) 0.04640(19) 0.5320(2) 0.0376(10) Uani 1 1 d . B .
H31 H 0.5803 0.0181 0.4904 0.045 Uiso 1 1 calc R . .
C32 C 0.6598(2) 0.02031(19) 0.5857(2) 0.0339(9) Uani 1 1 d . . .
H32 H 0.6712 -0.0269 0.5811 0.041 Uiso 1 1 calc R B .
C33 C 0.6995(2) 0.06107(17) 0.64686(18) 0.0255(8) Uani 1 1 d . B .
C34 C 0.5956(2) 0.22812(17) 0.60250(17) 0.0253(8) Uani 1 1 d . . .
C35 C 0.6425(2) 0.29035(18) 0.58673(17) 0.0271(8) Uani 1 1 d . B .
C36 C 0.6111(2) 0.35463(18) 0.58658(19) 0.0319(9) Uani 1 1 d . . .
H36 H 0.6431 0.3965 0.5762 0.038 Uiso 1 1 calc R B .
C37 C 0.5361(2) 0.35997(19) 0.60076(19) 0.0339(9) Uani 1 1 d . B .
C38 C 0.4900(2) 0.2982(2) 0.61557(19) 0.0336(9) Uani 1 1 d . . .
H38 H 0.4382 0.3010 0.6264 0.040 Uiso 1 1 calc R B .
C39 C 0.5176(2) 0.23221(19) 0.61498(18) 0.0285(8) Uani 1 1 d . B .
C40 C 0.7530(2) 0.02519(16) 0.70397(18) 0.0248(8) Uani 1 1 d . . .
C41 C 0.8231(2) -0.00102(17) 0.6928(2) 0.0297(9) Uani 1 1 d . B .
C42 C 0.8696(2) -0.03496(18) 0.7474(2) 0.0345(9) Uani 1 1 d . . .
H42 H 0.9185 -0.0509 0.7405 0.041 Uiso 1 1 calc R B .
C43 C 0.8484(2) -0.04670(19) 0.8113(2) 0.0361(9) Uani 1 1 d . B .
C44 C 0.7765(2) -0.02436(18) 0.8192(2) 0.0321(9) Uani 1 1 d . . .
H44 H 0.7594 -0.0332 0.8618 0.038 Uiso 1 1 calc R B .
C45 C 0.7275(2) 0.01090(17) 0.76667(19) 0.0279(8) Uani 1 1 d . B .
C46 C 0.7244(2) 0.2889(2) 0.5696(2) 0.0397(10) Uani 1 1 d . . .
H46A H 0.7539 0.3373 0.5732 0.059 Uiso 1 1 calc R B .
H46B H 0.7165 0.2693 0.5216 0.059 Uiso 1 1 calc R . .
H46C H 0.7566 0.2592 0.6028 0.059 Uiso 1 1 calc R . .
C47 C 0.5038(3) 0.4309(2) 0.5991(2) 0.0494(12) Uani 1 1 d . . .
H47A H 0.5457 0.4663 0.6281 0.074 Uiso 1 1 calc R B .
H47B H 0.4539 0.4260 0.6175 0.074 Uiso 1 1 calc R . .
H47C H 0.4908 0.4463 0.5505 0.074 Uiso 1 1 calc R . .
C48 C 0.4603(2) 0.1671(2) 0.6265(2) 0.0411(10) Uani 1 1 d . . .
H48A H 0.4261 0.1478 0.5811 0.062 Uiso 1 1 calc R B .
H48B H 0.4248 0.1804 0.6566 0.062 Uiso 1 1 calc R . .
H48C H 0.4928 0.1311 0.6493 0.062 Uiso 1 1 calc R . .
C49 C 0.8508(3) 0.0047(2) 0.6251(2) 0.0417(10) Uani 1 1 d . . .
H49A H 0.8346 -0.0409 0.5984 0.063 Uiso 1 1 calc R B .
H49B H 0.9108 0.0168 0.6353 0.063 Uiso 1 1 calc R . .
H49C H 0.8251 0.0418 0.5974 0.063 Uiso 1 1 calc R . .
C50 C 0.9010(2) -0.0830(2) 0.8695(2) 0.0480(11) Uani 1 1 d . . .
H50A H 0.9128 -0.0538 0.9131 0.072 Uiso 1 1 calc R B .
H50B H 0.9528 -0.0892 0.8568 0.072 Uiso 1 1 calc R . .
H50C H 0.8718 -0.1295 0.8763 0.072 Uiso 1 1 calc R . .
C51 C 0.6479(2) 0.02954(18) 0.7801(2) 0.0331(9) Uani 1 1 d . . .
H51A H 0.6153 0.0467 0.7370 0.050 Uiso 1 1 calc R B .
H51B H 0.6599 0.0668 0.8174 0.050 Uiso 1 1 calc R . .
H51C H 0.6169 -0.0127 0.7947 0.050 Uiso 1 1 calc R . .
Sb3 Sb 1.336279(15) 0.171698(12) 0.955349(12) 0.02503(6) Uani 1 1 d D . .
Si3 Si 1.14327(6) 0.11724(5) 0.85982(6) 0.0294(2) Uani 1 1 d D . .
Cl5A Cl 1.25579(7) 0.16350(9) 1.04281(5) 0.0333(4) Uani 0.944(3) 1 d PD C 1
C79A C 1.3202(8) 0.2813(3) 0.9403(7) 0.0257(12) Uani 0.944(3) 1 d P C 1
H79A H 1.2938 0.2875 0.8911 0.039 Uiso 0.944(3) 1 calc PR C 1
H79B H 1.3739 0.3110 0.9525 0.039 Uiso 0.944(3) 1 calc PR C 1
H79C H 1.2855 0.2954 0.9707 0.039 Uiso 0.944(3) 1 calc PR C 1
Cl5B Cl 1.324(4) 0.2952(12) 0.939(3) 0.0257(12) Uani 0.056(3) 1 d PD C 2
C79B C 1.265(3) 0.173(8) 1.033(2) 0.0333(4) Uani 0.056(3) 1 d PD C 2
H79D H 1.2883 0.2126 1.0674 0.050 Uiso 0.056(3) 1 calc PR C 2
H79E H 1.2655 0.1281 1.0580 0.050 Uiso 0.056(3) 1 calc PR C 2
H79F H 1.2079 0.1784 1.0106 0.050 Uiso 0.056(3) 1 calc PR C 2
Cl6A Cl 1.0927(5) 0.0926(4) 0.7569(2) 0.0426(9) Uani 0.503(4) 1 d PD C 1
C81A C 1.1299(19) 0.2122(10) 0.8730(17) 0.0428(8) Uani 0.503(4) 1 d PD C 1
H81A H 1.1598 0.2421 0.8439 0.064 Uiso 0.503(4) 1 calc PR C 1
H81B H 1.1516 0.2270 0.9226 0.064 Uiso 0.503(4) 1 calc PR C 1
H81C H 1.0713 0.2172 0.8595 0.064 Uiso 0.503(4) 1 calc PR C 1
Cl6B Cl 1.1221(4) 0.2192(2) 0.8698(4) 0.0428(8) Uani 0.497(4) 1 d PD C 2
C81B C 1.091(2) 0.0888(17) 0.7663(9) 0.0426(9) Uani 0.497(4) 1 d PD C 2
H81D H 1.1202 0.1156 0.7344 0.064 Uiso 0.497(4) 1 calc PR C 2
H81E H 1.0341 0.0981 0.7565 0.064 Uiso 0.497(4) 1 calc PR C 2
H81F H 1.0927 0.0379 0.7592 0.064 Uiso 0.497(4) 1 calc PR C 2
N3 N 1.24869(17) 0.11437(13) 0.87568(14) 0.0222(6) Uani 1 1 d . C .
C53 C 0.8837(2) 0.15030(19) 0.8152(2) 0.0356(9) Uani 1 1 d D B .
H53A H 0.8565 0.1539 0.8542 0.053 Uiso 1 1 calc R . .
H53B H 0.9414 0.1716 0.8302 0.053 Uiso 1 1 calc R . .
H53C H 0.8809 0.1002 0.8013 0.053 Uiso 1 1 calc R . .
C55 C 1.2865(2) 0.06982(16) 0.83595(17) 0.0216(7) Uani 1 1 d . . .
C56 C 1.3514(2) 0.10083(17) 0.80653(17) 0.0247(8) Uani 1 1 d . C .
C57 C 1.3861(2) 0.05987(19) 0.76484(18) 0.0315(9) Uani 1 1 d . . .
H57 H 1.4298 0.0813 0.7454 0.038 Uiso 1 1 calc R C .
C58 C 1.3577(2) -0.0118(2) 0.7514(2) 0.0364(10) Uani 1 1 d . C .
H58 H 1.3796 -0.0391 0.7210 0.044 Uiso 1 1 calc R . .
C59 C 1.2976(2) -0.04259(19) 0.78251(19) 0.0323(9) Uani 1 1 d . . .
H59 H 1.2792 -0.0920 0.7741 0.039 Uiso 1 1 calc R C .
C60 C 1.2620(2) -0.00444(17) 0.82626(18) 0.0246(8) Uani 1 1 d . C .
C61 C 1.3892(2) 0.17734(17) 0.81804(18) 0.0257(8) Uani 1 1 d . . .
C62 C 1.3507(2) 0.23099(18) 0.77980(18) 0.0279(8) Uani 1 1 d . C .
C63 C 1.3907(2) 0.30028(19) 0.78784(19) 0.0323(9) Uani 1 1 d . . .
H63 H 1.3649 0.3362 0.7615 0.039 Uiso 1 1 calc R C .
C64 C 1.4673(2) 0.31876(18) 0.83313(19) 0.0312(9) Uani 1 1 d . C .
C65 C 1.5057(2) 0.26561(18) 0.86921(19) 0.0314(9) Uani 1 1 d . . .
H65 H 1.5585 0.2774 0.8998 0.038 Uiso 1 1 calc R C .
C66 C 1.4683(2) 0.19436(18) 0.86146(18) 0.0271(8) Uani 1 1 d . C .
C67 C 1.2031(2) -0.04916(16) 0.86082(19) 0.0257(8) Uani 1 1 d . . .
C68 C 1.2230(2) -0.05738(17) 0.9338(2) 0.0299(9) Uani 1 1 d . C .
C69 C 1.1734(2) -0.10637(18) 0.9636(2) 0.0341(9) Uani 1 1 d . . .
H69 H 1.1869 -0.1110 1.0131 0.041 Uiso 1 1 calc R C .
C70 C 1.1055(3) -0.1486(2) 0.9241(2) 0.0421(11) Uani 1 1 d . C .
C71 C 1.0873(2) -0.14091(19) 0.8523(2) 0.0389(10) Uani 1 1 d . . .
H71 H 1.0407 -0.1696 0.8242 0.047 Uiso 1 1 calc R C .
C72 C 1.1352(2) -0.09221(17) 0.8193(2) 0.0305(9) Uani 1 1 d . C .
C73 C 1.2680(2) 0.2144(2) 0.7301(2) 0.0404(10) Uani 1 1 d . . .
H73A H 1.2253 0.2063 0.7570 0.061 Uiso 1 1 calc R C .
H73B H 1.2668 0.1716 0.7013 0.061 Uiso 1 1 calc R . .
H73C H 1.2578 0.2544 0.6995 0.061 Uiso 1 1 calc R . .
C74 C 1.5063(3) 0.39516(19) 0.8422(2) 0.0421(10) Uani 1 1 d . . .
H74A H 1.4752 0.4224 0.8670 0.063 Uiso 1 1 calc R C .
H74B H 1.5060 0.4148 0.7959 0.063 Uiso 1 1 calc R . .
H74C H 1.5631 0.3980 0.8696 0.063 Uiso 1 1 calc R . .
C75 C 1.5162(2) 0.13804(18) 0.8997(2) 0.0329(9) Uani 1 1 d . . .
H75A H 1.4794 0.1048 0.9204 0.049 Uiso 1 1 calc R C .
H75B H 1.5616 0.1609 0.9370 0.049 Uiso 1 1 calc R . .
H75C H 1.5383 0.1121 0.8663 0.049 Uiso 1 1 calc R . .
C76 C 1.2989(2) -0.01743(19) 0.98185(19) 0.0359(9) Uani 1 1 d . . .
H76A H 1.2842 0.0244 1.0032 0.054 Uiso 1 1 calc R C .
H76B H 1.3399 -0.0023 0.9546 0.054 Uiso 1 1 calc R . .
H76C H 1.3217 -0.0485 1.0189 0.054 Uiso 1 1 calc R . .
C77 C 1.0532(3) -0.2030(2) 0.9574(3) 0.0654(15) Uani 1 1 d . . .
H77A H 1.0890 -0.2274 0.9935 0.098 Uiso 1 1 calc R C .
H77B H 1.0205 -0.2379 0.9212 0.098 Uiso 1 1 calc R . .
H77C H 1.0163 -0.1791 0.9790 0.098 Uiso 1 1 calc R . .
C78 C 1.1103(3) -0.0895(2) 0.7404(2) 0.0397(10) Uani 1 1 d . . .
H78A H 1.1355 -0.0446 0.7254 0.060 Uiso 1 1 calc R C .
H78B H 1.0503 -0.0930 0.7254 0.060 Uiso 1 1 calc R . .
H78C H 1.1289 -0.1293 0.7189 0.060 Uiso 1 1 calc R . .
Sb4 Sb 0.362164(14) 0.677375(11) 0.736306(12) 0.02309(6) Uani 1 1 d D . .
Si4 Si 0.17169(6) 0.62726(5) 0.76128(5) 0.0260(2) Uani 1 1 d D . .
Cl7A Cl 0.27959(7) 0.65515(7) 0.61840(5) 0.0316(3) Uani 0.963(3) 1 d PD D 1
C106 C 0.3413(3) 0.7867(3) 0.7345(4) 0.0218(12) Uani 0.963(3) 1 d PD D 1
H10A H 0.3168 0.7973 0.7737 0.033 Uiso 0.963(3) 1 calc PR D 1
H10B H 0.3039 0.7950 0.6899 0.033 Uiso 0.963(3) 1 calc PR D 1
H10C H 0.3938 0.8175 0.7389 0.033 Uiso 0.963(3) 1 calc PR D 1
Cl7B Cl 0.321(3) 0.7932(15) 0.732(3) 0.0218(12) Uani 0.037(3) 1 d PD D 2
C137 C 0.276(8) 0.648(9) 0.638(4) 0.0316(3) Uani 0.037(3) 1 d PD D 2
H13A H 0.2991 0.6670 0.5989 0.047 Uiso 0.037(3) 1 calc PR D 2
H13B H 0.2245 0.6673 0.6370 0.047 Uiso 0.037(3) 1 calc PR D 2
H13C H 0.2642 0.5960 0.6320 0.047 Uiso 0.037(3) 1 calc PR D 2
Cl8A Cl 0.12118(19) 0.60538(13) 0.84630(13) 0.0367(5) Uani 0.816(4) 1 d PD D 1
C107 C 0.1487(15) 0.7164(7) 0.7338(12) 0.0411(15) Uani 0.816(4) 1 d PD D 1
H10D H 0.1775 0.7517 0.7709 0.062 Uiso 0.816(4) 1 calc PR D 1
H10E H 0.0893 0.7175 0.7253 0.062 Uiso 0.816(4) 1 calc PR D 1
H10F H 0.1672 0.7272 0.6905 0.062 Uiso 0.816(4) 1 calc PR D 1
Cl8B Cl 0.1459(16) 0.7256(9) 0.7361(14) 0.0411(15) Uani 0.184(4) 1 d PD D 2
C138 C 0.125(4) 0.616(3) 0.837(2) 0.0367(5) Uani 0.184(4) 1 d PD D 2
H18A H 0.1549 0.6494 0.8752 0.055 Uiso 0.184(4) 1 calc PR D 2
H18B H 0.1262 0.5672 0.8527 0.055 Uiso 0.184(4) 1 calc PR D 2
H18C H 0.0672 0.6249 0.8232 0.055 Uiso 0.184(4) 1 calc PR D 2
N4 N 0.27767(16) 0.62666(13) 0.78786(14) 0.0208(6) Uani 1 1 d . D .
C80 C 1.0856(2) 0.06439(19) 0.9158(2) 0.0363(9) Uani 1 1 d D C .
H80A H 1.0866 0.0137 0.9068 0.055 Uiso 1 1 calc R . .
H80B H 1.0285 0.0742 0.9050 0.055 Uiso 1 1 calc R . .
H80C H 1.1109 0.0771 0.9654 0.055 Uiso 1 1 calc R . .
C82 C 0.3179(2) 0.58879(16) 0.84604(17) 0.0204(7) Uani 1 1 d . . .
C83 C 0.3807(2) 0.62635(17) 0.89938(17) 0.0224(7) Uani 1 1 d . D .
C84 C 0.4188(2) 0.59119(18) 0.95717(18) 0.0295(8) Uani 1 1 d . . .
H84 H 0.4609 0.6170 0.9926 0.035 Uiso 1 1 calc R D .
C85 C 0.3971(2) 0.52024(19) 0.96412(19) 0.0339(9) Uani 1 1 d . D .
H85 H 0.4227 0.4971 1.0044 0.041 Uiso 1 1 calc R . .
C86 C 0.3371(2) 0.48271(18) 0.91154(19) 0.0304(9) Uani 1 1 d . . .
H86 H 0.3225 0.4333 0.9162 0.036 Uiso 1 1 calc R D .
C87 C 0.2977(2) 0.51459(17) 0.85230(17) 0.0235(8) Uani 1 1 d . D .
C88 C 0.4104(2) 0.70398(17) 0.89613(17) 0.0235(8) Uani 1 1 d . . .
C89 C 0.3653(2) 0.75621(18) 0.91398(17) 0.0251(8) Uani 1 1 d . D .
C90 C 0.3971(2) 0.82739(18) 0.91430(18) 0.0305(9) Uani 1 1 d . . .
H90 H 0.3660 0.8622 0.9256 0.037 Uiso 1 1 calc R D .
C91 C 0.4720(2) 0.84965(19) 0.89882(19) 0.0329(9) Uani 1 1 d . D .
C92 C 0.5169(2) 0.7984(2) 0.88227(18) 0.0337(9) Uani 1 1 d . . .
H92 H 0.5681 0.8129 0.8704 0.040 Uiso 1 1 calc R D .
C93 C 0.4885(2) 0.72558(19) 0.88271(18) 0.0292(8) Uani 1 1 d . D .
C94 C 0.2381(2) 0.46565(16) 0.79773(17) 0.0229(8) Uani 1 1 d . . .
C95 C 0.2567(2) 0.45098(16) 0.73323(18) 0.0250(8) Uani 1 1 d . D .
C96 C 0.2045(2) 0.40056(17) 0.68599(19) 0.0310(9) Uani 1 1 d . . .
H96 H 0.2175 0.3915 0.6422 0.037 Uiso 1 1 calc R D .
C97 C 0.1345(2) 0.36328(18) 0.7006(2) 0.0335(9) Uani 1 1 d . D .
C98 C 0.1171(2) 0.37773(18) 0.7650(2) 0.0345(9) Uani 1 1 d . . .
H98 H 0.0689 0.3530 0.7757 0.041 Uiso 1 1 calc R D .
C99 C 0.1678(2) 0.42723(17) 0.81477(18) 0.0277(8) Uani 1 1 d . D .
C100 C 0.2851(2) 0.73652(19) 0.9340(2) 0.0357(9) Uani 1 1 d . . .
H10G H 0.2426 0.7599 0.9034 0.054 Uiso 1 1 calc R D .
H10H H 0.2904 0.7519 0.9830 0.054 Uiso 1 1 calc R . .
H10I H 0.2696 0.6849 0.9287 0.054 Uiso 1 1 calc R . .
C101 C 0.5057(3) 0.9276(2) 0.9013(2) 0.0510(12) Uani 1 1 d . . .
H10J H 0.4728 0.9509 0.8624 0.076 Uiso 1 1 calc R D .
H10K H 0.5630 0.9327 0.8968 0.076 Uiso 1 1 calc R . .
H10L H 0.5034 0.9497 0.9461 0.076 Uiso 1 1 calc R . .
C102 C 0.5439(2) 0.6733(2) 0.8694(2) 0.0411(10) Uani 1 1 d . . .
H10M H 0.5770 0.6933 0.8372 0.062 Uiso 1 1 calc R D .
H10N H 0.5103 0.6290 0.8485 0.062 Uiso 1 1 calc R . .
H10O H 0.5803 0.6636 0.9140 0.062 Uiso 1 1 calc R . .
C103 C 0.3332(2) 0.48601(18) 0.7132(2) 0.0329(9) Uani 1 1 d . . .
H10P H 0.3572 0.4506 0.6906 0.049 Uiso 1 1 calc R D .
H10Q H 0.3730 0.5066 0.7556 0.049 Uiso 1 1 calc R . .
H10R H 0.3191 0.5237 0.6805 0.049 Uiso 1 1 calc R . .
C104 C 0.0800(3) 0.3066(2) 0.6507(2) 0.0458(11) Uani 1 1 d . . .
H10S H 0.0222 0.3117 0.6479 0.069 Uiso 1 1 calc R D .
H10T H 0.0906 0.2596 0.6680 0.069 Uiso 1 1 calc R . .
H10U H 0.0917 0.3115 0.6040 0.069 Uiso 1 1 calc R . .
C105 C 0.1463(3) 0.4345(2) 0.8850(2) 0.0407(10) Uani 1 1 d . . .
H10V H 0.0871 0.4360 0.8778 0.061 Uiso 1 1 calc R D .
H10W H 0.1767 0.4785 0.9096 0.061 Uiso 1 1 calc R . .
H10X H 0.1612 0.3938 0.9131 0.061 Uiso 1 1 calc R . .
C108 C 0.1152(2) 0.56428(18) 0.68862(18) 0.0278(8) Uani 1 1 d D D .
H10Y H 0.1420 0.5696 0.6490 0.042 Uiso 1 1 calc R . .
H10Z H 0.0584 0.5743 0.6735 0.042 Uiso 1 1 calc R . .
H10 H 0.1152 0.5156 0.7048 0.042 Uiso 1 1 calc R . .
C109 C 0.8247(8) 0.6159(6) 0.9028(5) 0.133(3) Uani 0.693(5) 1 d PD E 1
H11B H 0.8761 0.6419 0.8954 0.199 Uiso 0.693(5) 1 calc PR E 1
H11C H 0.8085 0.6391 0.9416 0.199 Uiso 0.693(5) 1 calc PR E 1
H11D H 0.7813 0.6157 0.8598 0.199 Uiso 0.693(5) 1 calc PR E 1
C110 C 0.8370(7) 0.5418(3) 0.9204(3) 0.094(3) Uani 0.693(5) 1 d PGD E 1
C111 C 0.7661(5) 0.5022(5) 0.9321(3) 0.093(3) Uani 0.693(5) 1 d PG E 1
H111 H 0.7179 0.5239 0.9296 0.112 Uiso 0.693(5) 1 calc PR E 1
C112 C 0.7658(4) 0.4308(5) 0.9472(3) 0.078(2) Uani 0.693(5) 1 d PG E 1
H112 H 0.7174 0.4037 0.9552 0.093 Uiso 0.693(5) 1 calc PR E 1
C113 C 0.8363(6) 0.3991(3) 0.9508(4) 0.133(3) Uani 0.693(5) 1 d PG E 1
H113 H 0.8361 0.3503 0.9612 0.160 Uiso 0.693(5) 1 calc PR E 1
C114 C 0.9072(4) 0.4387(6) 0.9392(4) 0.102(3) Uani 0.693(5) 1 d PG E 1
H114 H 0.9554 0.4170 0.9416 0.123 Uiso 0.693(5) 1 calc PR E 1
C115 C 0.9075(5) 0.5100(5) 0.9240(3) 0.114(5) Uani 0.693(5) 1 d PG E 1
H115 H 0.9559 0.5371 0.9161 0.137 Uiso 0.693(5) 1 calc PR E 1
C116 C 0.8488(19) 0.4101(10) 0.9429(16) 0.133(3) Uani 0.307(5) 1 d PD E 2
H11E H 0.7947 0.3849 0.9446 0.199 Uiso 0.307(5) 1 calc PR E 2
H11F H 0.8881 0.4050 0.9873 0.199 Uiso 0.307(5) 1 calc PR E 2
H11G H 0.8676 0.3900 0.9040 0.199 Uiso 0.307(5) 1 calc PR E 2
C117 C 0.8427(14) 0.4846(7) 0.9321(7) 0.094(3) Uani 0.307(5) 1 d PGD E 2
C122 C 0.9082(10) 0.5353(10) 0.9268(7) 0.093(3) Uani 0.307(5) 1 d PGD E 2
H122 H 0.9604 0.5213 0.9271 0.112 Uiso 0.307(5) 1 calc PR E 2
C121 C 0.8974(10) 0.6064(9) 0.9210(7) 0.078(2) Uani 0.307(5) 1 d PG E 2
H121 H 0.9422 0.6411 0.9174 0.093 Uiso 0.307(5) 1 calc PR E 2
C120 C 0.8210(12) 0.6269(7) 0.9205(7) 0.133(3) Uani 0.307(5) 1 d PG E 2
H120 H 0.8136 0.6755 0.9165 0.160 Uiso 0.307(5) 1 calc PR E 2
C119 C 0.7554(9) 0.5762(12) 0.9258(7) 0.102(3) Uani 0.307(5) 1 d PG E 2
H119 H 0.7032 0.5901 0.9254 0.123 Uiso 0.307(5) 1 calc PR E 2
C118 C 0.7663(11) 0.5050(10) 0.9316(7) 0.114(5) Uani 0.307(5) 1 d PG E 2
H118 H 0.7215 0.4703 0.9352 0.137 Uiso 0.307(5) 1 calc PR E 2
C123 C 0.8316(15) -0.0420(9) 0.4100(13) 0.130(10) Uani 0.475(4) 1 d PD F 1
H12A H 0.7740 -0.0639 0.4007 0.196 Uiso 0.475(4) 1 calc PR F 1
H12B H 0.8643 -0.0660 0.4484 0.196 Uiso 0.475(4) 1 calc PR F 1
H12C H 0.8526 -0.0464 0.3676 0.196 Uiso 0.475(4) 1 calc PR F 1
C124 C 0.8373(13) 0.0347(5) 0.4303(12) 0.093(4) Uani 0.475(4) 1 d PGD F 1
C125 C 0.9157(10) 0.0732(8) 0.4462(10) 0.094(5) Uani 0.475(4) 1 d PG F 1
H125 H 0.9622 0.0501 0.4456 0.112 Uiso 0.475(4) 1 calc PR F 1
C126 C 0.9260(7) 0.1456(9) 0.4631(10) 0.124(8) Uani 0.475(4) 1 d PG F 1
H126 H 0.9795 0.1719 0.4739 0.149 Uiso 0.475(4) 1 calc PR F 1
C127 C 0.8579(10) 0.1794(6) 0.4640(10) 0.126(9) Uani 0.475(4) 1 d PG F 1
H127 H 0.8649 0.2288 0.4755 0.151 Uiso 0.475(4) 1 calc PR F 1
C128 C 0.7795(8) 0.1408(9) 0.4481(8) 0.092(4) Uani 0.475(4) 1 d PG F 1
H128 H 0.7330 0.1639 0.4488 0.110 Uiso 0.475(4) 1 calc PR F 1
C129 C 0.7692(9) 0.0685(9) 0.4313(10) 0.097(5) Uani 0.475(4) 1 d PG F 1
H129 H 0.7157 0.0422 0.4204 0.117 Uiso 0.475(4) 1 calc PR F 1
C130 C 0.778(3) -0.0369(15) 0.417(3) 0.130(10) Uani 0.265(7) 1 d PD G 2
H13D H 0.7191 -0.0347 0.4048 0.196 Uiso 0.265(7) 1 calc PR G 2
H13E H 0.7922 -0.0653 0.4584 0.196 Uiso 0.265(7) 1 calc PR G 2
H13F H 0.7941 -0.0590 0.3771 0.196 Uiso 0.265(7) 1 calc PR G 2
C131 C 0.8237(17) 0.0359(10) 0.432(2) 0.093(4) Uani 0.265(7) 1 d PGD G 2
C132 C 0.9091(18) 0.0428(11) 0.451(2) 0.094(5) Uani 0.265(7) 1 d PGD G 2
H132 H 0.9363 0.0020 0.4509 0.112 Uiso 0.265(7) 1 calc PR G 2
C133 C 0.9547(13) 0.1093(14) 0.4693(17) 0.124(8) Uani 0.265(7) 1 d PG G 2
H133 H 1.0131 0.1140 0.4823 0.149 Uiso 0.265(7) 1 calc PR G 2
C134 C 0.9149(17) 0.1690(10) 0.4689(17) 0.126(9) Uani 0.265(7) 1 d PG G 2
H134 H 0.9461 0.2145 0.4816 0.151 Uiso 0.265(7) 1 calc PR G 2
C135 C 0.8295(17) 0.1621(11) 0.4499(18) 0.092(4) Uani 0.265(7) 1 d PG G 2
H135 H 0.8024 0.2029 0.4496 0.110 Uiso 0.265(7) 1 calc PR G 2
C136 C 0.7839(13) 0.0956(14) 0.4312(19) 0.097(5) Uani 0.265(7) 1 d PGD G 2
H136 H 0.7255 0.0909 0.4182 0.117 Uiso 0.265(7) 1 calc PR G 2
C145 C 0.888(3) 0.1697(13) 0.450(2) 0.17(3) Uani 0.259(6) 1 d PD H 3
H14A H 0.8390 0.1915 0.4523 0.252 Uiso 0.259(6) 1 calc PR H 3
H14B H 0.9074 0.1853 0.4084 0.252 Uiso 0.259(6) 1 calc PR H 3
H14C H 0.9314 0.1842 0.4925 0.252 Uiso 0.259(6) 1 calc PR H 3
C139 C 0.8967(14) -0.0266(12) 0.4277(12) 0.092(4) Uani 0.259(6) 1 d PG H 3
H139 H 0.9350 -0.0581 0.4237 0.110 Uiso 0.259(6) 1 calc PR H 3
C140 C 0.8142(16) -0.0529(9) 0.4208(14) 0.126(9) Uani 0.259(6) 1 d PG H 3
H140 H 0.7960 -0.1023 0.4121 0.151 Uiso 0.259(6) 1 calc PR H 3
C141 C 0.7582(12) -0.0068(13) 0.4267(15) 0.124(8) Uani 0.259(6) 1 d PG H 3
H141 H 0.7018 -0.0247 0.4220 0.149 Uiso 0.259(6) 1 calc PR H 3
C142 C 0.7848(15) 0.0655(12) 0.4394(12) 0.094(5) Uani 0.259(6) 1 d PGD H 3
H142 H 0.7466 0.0970 0.4434 0.112 Uiso 0.259(6) 1 calc PR H 3
C143 C 0.8674(16) 0.0918(9) 0.4463(10) 0.093(4) Uani 0.259(6) 1 d PGD H 3
C144 C 0.9233(12) 0.0457(13) 0.4404(10) 0.097(5) Uani 0.259(6) 1 d PGD H 3
H144 H 0.9797 0.0636 0.4451 0.117 Uiso 0.259(6) 1 calc PR H 3
 
loop_
 _atom_site_aniso_label
 _atom_site_aniso_U_11
 _atom_site_aniso_U_22
 _atom_site_aniso_U_33
 _atom_site_aniso_U_23
 _atom_site_aniso_U_13
 _atom_site_aniso_U_12
Sb1 0.02581(14) 0.02602(13) 0.02357(13) 0.00285(10) 0.00667(11) 0.00797(10)
Si1 0.0220(5) 0.0233(5) 0.0320(6) -0.0026(4) 0.0086(4) 0.0009(4)
Cl1A 0.0414(7) 0.0397(7) 0.0253(6) 0.0066(5) 0.0167(5) 0.0137(5)
C25A 0.035(3) 0.013(2) 0.023(4) 0.000(2) 0.015(2) 0.012(2)
Cl1B 0.035(3) 0.013(2) 0.023(4) 0.000(2) 0.015(2) 0.012(2)
C25B 0.0414(7) 0.0397(7) 0.0253(6) 0.0066(5) 0.0167(5) 0.0137(5)
Cl2A 0.0295(11) 0.0411(11) 0.0321(8) 0.0010(7) -0.0013(7) 0.0027(6)
C26A 0.038(3) 0.018(3) 0.062(3) 0.001(3) 0.015(2) -0.006(3)
Cl2B 0.038(3) 0.018(3) 0.062(3) 0.001(3) 0.015(2) -0.006(3)
C26B 0.0295(11) 0.0411(11) 0.0321(8) 0.0010(7) -0.0013(7) 0.0027(6)
N1 0.0211(16) 0.0183(14) 0.0221(15) 0.0004(11) 0.0069(12) 0.0016(11)
C1 0.0207(19) 0.0209(17) 0.0177(17) -0.0008(13) 0.0039(14) 0.0016(14)
C2 0.0192(18) 0.0198(17) 0.0214(18) -0.0020(14) 0.0027(14) 0.0006(14)
C3 0.032(2) 0.0216(18) 0.026(2) 0.0010(15) 0.0080(17) 0.0033(15)
C4 0.044(3) 0.028(2) 0.029(2) 0.0056(16) 0.0192(19) -0.0011(17)
C5 0.033(2) 0.031(2) 0.031(2) -0.0032(16) 0.0177(18) 0.0037(16)
C6 0.026(2) 0.0170(17) 0.0231(19) -0.0065(14) 0.0038(15) -0.0007(14)
C7 0.0242(19) 0.0122(15) 0.0245(19) 0.0001(13) 0.0065(15) -0.0009(13)
C8 0.0226(19) 0.0169(16) 0.0238(19) -0.0027(14) 0.0041(15) -0.0005(14)
C9 0.033(2) 0.0232(18) 0.0230(19) -0.0048(14) 0.0069(16) 0.0021(16)
C10 0.028(2) 0.0223(18) 0.037(2) -0.0020(16) 0.0074(18) 0.0044(16)
C11 0.024(2) 0.0202(18) 0.035(2) -0.0004(15) 0.0024(17) 0.0066(15)
C12 0.024(2) 0.0187(17) 0.0229(19) -0.0002(14) 0.0011(15) 0.0002(14)
C13 0.026(2) 0.0231(18) 0.0213(18) -0.0036(14) 0.0131(16) 0.0039(15)
C14 0.028(2) 0.0250(19) 0.033(2) -0.0041(15) 0.0145(17) 0.0012(16)
C15 0.024(2) 0.033(2) 0.036(2) -0.0009(17) 0.0129(17) 0.0059(16)
C16 0.033(2) 0.027(2) 0.040(2) 0.0009(16) 0.0216(19) 0.0063(17)
C17 0.037(2) 0.0216(18) 0.036(2) -0.0086(16) 0.0177(19) 0.0000(16)
C18 0.034(2) 0.0234(18) 0.027(2) -0.0048(15) 0.0150(17) 0.0012(16)
C19 0.028(2) 0.030(2) 0.0228(19) -0.0046(15) -0.0014(16) 0.0067(16)
C20 0.048(3) 0.050(3) 0.046(3) -0.003(2) 0.017(2) 0.024(2)
C21 0.033(2) 0.029(2) 0.030(2) 0.0009(16) -0.0030(17) 0.0064(16)
C22 0.025(2) 0.029(2) 0.041(2) -0.0081(17) 0.0104(18) 0.0048(16)
C23 0.044(3) 0.027(2) 0.061(3) 0.0016(19) 0.023(2) 0.0108(18)
C24 0.038(2) 0.031(2) 0.036(2) -0.0106(17) 0.0044(19) 0.0043(17)
Sb2 0.02719(14) 0.02415(13) 0.02441(13) 0.00236(10) 0.00720(11) 0.00656(10)
Si2 0.0239(6) 0.0277(6) 0.0461(7) 0.0038(5) 0.0083(5) -0.0012(4)
Cl3A 0.0371(7) 0.0406(7) 0.0229(6) 0.0042(5) 0.0032(5) 0.0084(6)
C52A 0.041(3) 0.019(2) 0.025(3) -0.005(2) 0.011(2) 0.011(2)
Cl3B 0.041(3) 0.019(2) 0.025(3) -0.005(2) 0.011(2) 0.011(2)
C52B 0.0371(7) 0.0406(7) 0.0229(6) 0.0042(5) 0.0032(5) 0.0084(6)
Cl4A 0.0388(14) 0.0394(17) 0.0602(13) 0.0009(9) 0.0264(8) 0.0042(8)
C54A 0.0430(18) 0.0264(16) 0.0839(18) -0.0122(16) 0.0109(12) -0.0066(15)
Cl4B 0.0430(18) 0.0264(16) 0.0839(18) -0.0122(16) 0.0109(12) -0.0066(15)
C54B 0.0388(14) 0.0394(17) 0.0602(13) 0.0009(9) 0.0264(8) 0.0042(8)
N2 0.0218(16) 0.0199(14) 0.0246(16) 0.0015(12) 0.0087(13) 0.0017(12)
C27 0.024(2) 0.035(2) 0.040(2) -0.0016(17) 0.0144(18) 0.0053(16)
C28 0.025(2) 0.0234(18) 0.0247(19) 0.0016(14) 0.0119(16) -0.0015(15)
C29 0.031(2) 0.0229(18) 0.0245(19) 0.0039(15) 0.0099(16) -0.0013(15)
C30 0.035(2) 0.039(2) 0.030(2) 0.0033(17) 0.0031(18) 0.0065(18)
C31 0.044(3) 0.030(2) 0.034(2) -0.0077(17) 0.004(2) -0.0031(18)
C32 0.042(2) 0.0223(19) 0.038(2) -0.0030(17) 0.012(2) 0.0028(17)
C33 0.025(2) 0.0226(18) 0.032(2) 0.0022(15) 0.0135(16) 0.0029(15)
C34 0.026(2) 0.0262(19) 0.0206(18) 0.0044(14) -0.0006(15) 0.0041(15)
C35 0.032(2) 0.0283(19) 0.0207(19) 0.0072(15) 0.0048(16) 0.0062(16)
C36 0.037(2) 0.0243(19) 0.032(2) 0.0051(16) 0.0002(18) 0.0056(17)
C37 0.037(2) 0.033(2) 0.026(2) -0.0027(16) -0.0081(18) 0.0138(18)
C38 0.024(2) 0.048(2) 0.028(2) 0.0021(17) 0.0007(17) 0.0115(18)
C39 0.027(2) 0.035(2) 0.0228(19) 0.0070(15) 0.0022(16) 0.0047(16)
C40 0.030(2) 0.0135(16) 0.032(2) -0.0006(14) 0.0109(17) 0.0023(14)
C41 0.033(2) 0.0200(18) 0.039(2) 0.0021(16) 0.0153(18) 0.0027(16)
C42 0.029(2) 0.0244(19) 0.054(3) 0.0051(18) 0.016(2) 0.0067(16)
C43 0.032(2) 0.026(2) 0.048(3) 0.0092(18) 0.009(2) -0.0017(17)
C44 0.034(2) 0.0259(19) 0.036(2) 0.0076(16) 0.0097(18) -0.0022(16)
C45 0.029(2) 0.0192(18) 0.037(2) 0.0016(15) 0.0127(18) 0.0003(15)
C46 0.042(3) 0.035(2) 0.047(3) 0.0143(18) 0.022(2) 0.0032(18)
C47 0.050(3) 0.039(2) 0.055(3) -0.007(2) -0.007(2) 0.022(2)
C48 0.027(2) 0.050(3) 0.043(3) 0.011(2) 0.0059(19) -0.0024(19)
C49 0.048(3) 0.036(2) 0.050(3) 0.0025(19) 0.026(2) 0.0132(19)
C50 0.031(2) 0.050(3) 0.061(3) 0.021(2) 0.006(2) 0.006(2)
C51 0.034(2) 0.027(2) 0.043(2) 0.0071(17) 0.0184(19) 0.0074(17)
Sb3 0.02543(14) 0.02495(13) 0.02396(13) -0.00194(10) 0.00628(11) -0.00014(10)
Si3 0.0240(6) 0.0288(5) 0.0365(6) 0.0038(4) 0.0065(5) 0.0079(4)
Cl5A 0.0354(7) 0.0380(8) 0.0283(6) -0.0023(5) 0.0151(4) -0.0019(5)
C79A 0.039(3) 0.009(3) 0.031(2) -0.004(3) 0.0152(16) 0.001(4)
Cl5B 0.039(3) 0.009(3) 0.031(2) -0.004(3) 0.0152(16) 0.001(4)
C79B 0.0354(7) 0.0380(8) 0.0283(6) -0.0023(5) 0.0151(4) -0.0019(5)
Cl6A 0.0352(11) 0.0464(12) 0.0400(16) -0.0014(14) -0.0047(13) 0.0064(9)
C81A 0.0338(19) 0.0253(13) 0.0702(15) -0.0028(12) 0.0094(12) 0.0121(9)
Cl6B 0.0338(19) 0.0253(13) 0.0702(15) -0.0028(12) 0.0094(12) 0.0121(9)
C81B 0.0352(11) 0.0464(12) 0.0400(16) -0.0014(14) -0.0047(13) 0.0064(9)
N3 0.0236(16) 0.0191(14) 0.0229(15) -0.0022(11) 0.0028(13) 0.0034(12)
C53 0.018(2) 0.038(2) 0.049(3) -0.0034(18) 0.0015(18) 0.0054(16)
C55 0.025(2) 0.0216(17) 0.0181(17) 0.0011(13) 0.0011(15) 0.0091(14)
C56 0.029(2) 0.0246(18) 0.0209(18) 0.0049(14) 0.0047(16) 0.0082(15)
C57 0.037(2) 0.032(2) 0.030(2) 0.0061(16) 0.0126(18) 0.0098(17)
C58 0.044(3) 0.037(2) 0.035(2) -0.0006(18) 0.016(2) 0.0197(19)
C59 0.036(2) 0.0244(19) 0.036(2) -0.0015(16) 0.0051(18) 0.0087(17)
C60 0.024(2) 0.0241(18) 0.0253(19) -0.0003(15) 0.0016(15) 0.0088(15)
C61 0.032(2) 0.0262(19) 0.0233(19) 0.0050(15) 0.0123(16) 0.0090(16)
C62 0.032(2) 0.029(2) 0.025(2) 0.0057(15) 0.0096(17) 0.0068(16)
C63 0.039(2) 0.031(2) 0.032(2) 0.0135(16) 0.0137(19) 0.0134(18)
C64 0.040(2) 0.0249(19) 0.034(2) 0.0052(16) 0.0180(19) 0.0047(17)
C65 0.031(2) 0.034(2) 0.031(2) 0.0038(16) 0.0120(18) 0.0023(17)
C66 0.030(2) 0.029(2) 0.027(2) 0.0071(15) 0.0132(17) 0.0078(16)
C67 0.030(2) 0.0154(17) 0.033(2) 0.0003(15) 0.0079(17) 0.0063(15)
C68 0.032(2) 0.0217(18) 0.037(2) 0.0055(16) 0.0069(18) 0.0108(16)
C69 0.040(2) 0.026(2) 0.038(2) 0.0089(17) 0.0093(19) 0.0100(18)
C70 0.042(3) 0.027(2) 0.062(3) 0.015(2) 0.018(2) 0.0083(19)
C71 0.029(2) 0.023(2) 0.061(3) -0.0017(19) 0.006(2) 0.0008(16)
C72 0.034(2) 0.0196(18) 0.038(2) -0.0007(16) 0.0056(18) 0.0091(16)
C73 0.042(3) 0.037(2) 0.039(2) 0.0154(18) 0.003(2) 0.0065(19)
C74 0.043(3) 0.029(2) 0.057(3) 0.0008(19) 0.020(2) 0.0015(18)
C75 0.030(2) 0.032(2) 0.037(2) 0.0087(17) 0.0086(18) 0.0048(17)
C76 0.041(3) 0.033(2) 0.031(2) 0.0058(17) 0.0028(19) 0.0085(18)
C77 0.059(3) 0.051(3) 0.087(4) 0.027(3) 0.024(3) -0.003(2)
C78 0.038(3) 0.033(2) 0.042(3) -0.0050(18) -0.001(2) 0.0012(18)
Sb4 0.02451(14) 0.02170(12) 0.02272(13) -0.00055(9) 0.00640(10) 0.00037(10)
Si4 0.0218(5) 0.0272(5) 0.0287(6) 0.0011(4) 0.0035(4) 0.0059(4)
Cl7A 0.0370(6) 0.0341(6) 0.0202(6) -0.0019(5) 0.0031(5) -0.0017(4)
C106 0.021(4) 0.0185(18) 0.026(2) 0.0008(15) 0.004(3) 0.0067(16)
Cl7B 0.021(4) 0.0185(18) 0.026(2) 0.0008(15) 0.004(3) 0.0067(16)
C137 0.0370(6) 0.0341(6) 0.0202(6) -0.0019(5) 0.0031(5) -0.0017(4)
Cl8A 0.0296(8) 0.0450(12) 0.0376(10) 0.0035(7) 0.0137(6) 0.0020(7)
C107 0.036(2) 0.028(3) 0.060(2) 0.005(3) 0.0062(15) 0.014(2)
Cl8B 0.036(2) 0.028(3) 0.060(2) 0.005(3) 0.0062(15) 0.014(2)
C138 0.0296(8) 0.0450(12) 0.0376(10) 0.0035(7) 0.0137(6) 0.0020(7)
N4 0.0202(16) 0.0211(14) 0.0206(15) 0.0013(11) 0.0033(12) 0.0036(12)
C80 0.026(2) 0.034(2) 0.048(3) 0.0011(18) 0.0084(19) 0.0026(17)
C82 0.0210(19) 0.0219(17) 0.0201(18) 0.0009(14) 0.0071(14) 0.0046(14)
C83 0.0199(19) 0.0247(18) 0.0238(19) -0.0012(14) 0.0055(15) 0.0066(14)
C84 0.025(2) 0.033(2) 0.028(2) -0.0001(16) 0.0009(16) 0.0028(16)
C85 0.037(2) 0.037(2) 0.026(2) 0.0090(17) -0.0019(18) 0.0162(18)
C86 0.036(2) 0.0215(18) 0.034(2) 0.0059(16) 0.0075(18) 0.0082(16)
C87 0.025(2) 0.0212(18) 0.0257(19) 0.0000(14) 0.0075(16) 0.0045(14)
C88 0.024(2) 0.0264(18) 0.0177(18) -0.0030(14) 0.0009(15) 0.0014(15)
C89 0.024(2) 0.0300(19) 0.0199(18) -0.0039(14) 0.0031(15) 0.0019(15)
C90 0.035(2) 0.0260(19) 0.027(2) -0.0054(15) 0.0008(17) 0.0059(17)
C91 0.035(2) 0.029(2) 0.027(2) 0.0010(16) -0.0050(18) -0.0042(17)
C92 0.027(2) 0.046(2) 0.023(2) -0.0013(17) 0.0039(17) -0.0078(18)
C93 0.022(2) 0.039(2) 0.023(2) -0.0079(16) 0.0023(16) -0.0006(16)
C94 0.027(2) 0.0157(16) 0.0252(19) 0.0021(14) 0.0021(16) 0.0060(14)
C95 0.030(2) 0.0164(17) 0.030(2) 0.0031(14) 0.0076(16) 0.0068(15)
C96 0.038(2) 0.0230(19) 0.031(2) -0.0027(16) 0.0051(18) 0.0077(17)
C97 0.034(2) 0.0210(19) 0.042(2) 0.0008(16) 0.0009(19) 0.0055(16)
C98 0.029(2) 0.0241(19) 0.046(3) 0.0064(17) 0.0036(19) -0.0036(16)
C99 0.033(2) 0.0218(18) 0.029(2) 0.0052(15) 0.0076(17) 0.0047(16)
C100 0.034(2) 0.032(2) 0.043(2) -0.0080(17) 0.0152(19) 0.0032(17)
C101 0.055(3) 0.033(2) 0.053(3) 0.009(2) -0.006(2) -0.007(2)
C102 0.027(2) 0.052(3) 0.044(3) -0.014(2) 0.0080(19) 0.0040(19)
C103 0.039(2) 0.0239(19) 0.038(2) -0.0036(16) 0.0138(19) 0.0051(17)
C104 0.045(3) 0.033(2) 0.052(3) -0.0080(19) -0.003(2) 0.0031(19)
C105 0.043(3) 0.040(2) 0.041(2) 0.0031(19) 0.020(2) -0.0020(19)
C108 0.0165(19) 0.032(2) 0.031(2) 0.0019(16) -0.0011(16) 0.0003(15)
C109 0.204(8) 0.132(6) 0.048(4) -0.009(3) 0.014(4) -0.003(6)
C110 0.152(9) 0.094(7) 0.023(4) 0.004(4) 0.003(6) -0.001(8)
C111 0.091(9) 0.156(10) 0.035(5) -0.021(6) 0.010(5) 0.027(8)
C112 0.072(6) 0.101(7) 0.052(5) -0.001(4) 0.008(4) -0.003(5)
C113 0.204(8) 0.132(6) 0.048(4) -0.009(3) 0.014(4) -0.003(6)
C114 0.086(8) 0.176(11) 0.050(5) 0.003(6) 0.021(5) 0.027(7)
C115 0.096(10) 0.178(13) 0.045(6) 0.011(7) 0.013(6) -0.062(10)
C116 0.204(8) 0.132(6) 0.048(4) -0.009(3) 0.014(4) -0.003(6)
C117 0.152(9) 0.094(7) 0.023(4) 0.004(4) 0.003(6) -0.001(8)
C122 0.091(9) 0.156(10) 0.035(5) -0.021(6) 0.010(5) 0.027(8)
C121 0.072(6) 0.101(7) 0.052(5) -0.001(4) 0.008(4) -0.003(5)
C120 0.204(8) 0.132(6) 0.048(4) -0.009(3) 0.014(4) -0.003(6)
C119 0.086(8) 0.176(11) 0.050(5) 0.003(6) 0.021(5) 0.027(7)
C118 0.096(10) 0.178(13) 0.045(6) 0.011(7) 0.013(6) -0.062(10)
C123 0.20(3) 0.124(12) 0.059(10) -0.007(7) 0.046(16) -0.020(16)
C124 0.141(11) 0.107(8) 0.034(4) 0.012(5) 0.026(7) 0.020(8)
C125 0.101(11) 0.133(14) 0.064(8) 0.015(12) 0.031(8) 0.057(13)
C126 0.124(15) 0.16(2) 0.075(12) 0.029(14) 0.022(10) -0.008(13)
C127 0.18(3) 0.135(17) 0.090(13) 0.026(9) 0.077(15) 0.051(16)
C128 0.095(12) 0.127(12) 0.054(6) -0.009(7) 0.017(9) 0.021(10)
C129 0.086(10) 0.162(16) 0.044(6) 0.021(10) 0.018(7) 0.012(11)
C130 0.20(3) 0.124(12) 0.059(10) -0.007(7) 0.046(16) -0.020(16)
C131 0.141(11) 0.107(8) 0.034(4) 0.012(5) 0.026(7) 0.020(8)
C132 0.101(11) 0.133(14) 0.064(8) 0.015(12) 0.031(8) 0.057(13)
C133 0.124(15) 0.16(2) 0.075(12) 0.029(14) 0.022(10) -0.008(13)
C134 0.18(3) 0.135(17) 0.090(13) 0.026(9) 0.077(15) 0.051(16)
C135 0.095(12) 0.127(12) 0.054(6) -0.009(7) 0.017(9) 0.021(10)
C136 0.086(10) 0.162(16) 0.044(6) 0.021(10) 0.018(7) 0.012(11)
C145 0.23(5) 0.17(5) 0.042(18) 0.06(2) -0.05(3) -0.09(4)
C139 0.095(12) 0.127(12) 0.054(6) -0.009(7) 0.017(9) 0.021(10)
C140 0.18(3) 0.135(17) 0.090(13) 0.026(9) 0.077(15) 0.051(16)
C141 0.124(15) 0.16(2) 0.075(12) 0.029(14) 0.022(10) -0.008(13)
C142 0.101(11) 0.133(14) 0.064(8) 0.015(12) 0.031(8) 0.057(13)
C143 0.141(11) 0.107(8) 0.034(4) 0.012(5) 0.026(7) 0.020(8)
C144 0.086(10) 0.162(16) 0.044(6) 0.021(10) 0.018(7) 0.012(11)

#==============================================================================

# MOLECULAR GEOMETRY 
 
_geom_special_details
;
 All s.u.'s (except the s.u. in the dihedral angle between two l.s. planes)
 are estimated using the full covariance matrix.  The cell s.u.'s are taken
 into account individually in the estimation of s.u.'s in distances, angles
 and torsion angles; correlations between s.u.'s in cell parameters are only
 used when they are defined by crystal symmetry.  An approximate (isotropic)
 treatment of cell s.u.'s is used for estimating s.u.'s involving l.s. planes.
;
 
loop_
 _geom_bond_atom_site_label_1
 _geom_bond_atom_site_label_2
 _geom_bond_distance
 _geom_bond_site_symmetry_2
 _geom_bond_publ_flag
Sb1 N1 2.065(3) . ?
Sb1 C25B 2.1501(12) . ?
Sb1 C25A 2.159(5) . ?
Sb1 Cl1B 2.397(18) . ?
Sb1 Cl1A 2.4079(7) . ?
Si1 N1 1.741(3) . ?
Si1 C26B 1.837(18) . ?
Si1 C26A 1.838(11) . ?
Si1 C27 1.849(3) . ?
Si1 Cl2B 2.023(13) . ?
Si1 Cl2A 2.0557(17) . ?
C25A H25A 0.9800 . ?
C25A H25B 0.9800 . ?
C25A H25C 0.9800 . ?
C25B H25D 0.9800 . ?
C25B H25E 0.9800 . ?
C25B H25F 0.9800 . ?
C26A H26A 0.9800 . ?
C26A H26B 0.9800 . ?
C26A H26C 0.9800 . ?
C26B H26D 0.9800 . ?
C26B H26E 0.9800 . ?
C26B H26F 0.9800 . ?
N1 C1 1.438(4) . ?
C1 C6 1.412(4) . ?
C1 C2 1.416(4) . ?
C2 C3 1.399(5) . ?
C2 C7 1.498(4) . ?
C3 C4 1.370(5) . ?
C3 H3 0.9500 . ?
C4 C5 1.388(5) . ?
C4 H4 0.9500 . ?
C5 C6 1.386(5) . ?
C5 H5 0.9500 . ?
C6 C13 1.510(4) . ?
C7 C8 1.405(4) . ?
C7 C12 1.411(4) . ?
C8 C9 1.391(5) . ?
C8 C19 1.510(4) . ?
C9 C10 1.382(5) . ?
C9 H9 0.9500 . ?
C10 C11 1.386(5) . ?
C10 C20 1.507(5) . ?
C11 C12 1.386(5) . ?
C11 H11 0.9500 . ?
C12 C21 1.515(5) . ?
C13 C18 1.407(4) . ?
C13 C14 1.411(5) . ?
C14 C15 1.399(5) . ?
C14 C22 1.517(5) . ?
C15 C16 1.388(5) . ?
C15 H15 0.9500 . ?
C16 C17 1.381(5) . ?
C16 C23 1.511(5) . ?
C17 C18 1.391(5) . ?
C17 H17 0.9500 . ?
C18 C24 1.501(5) . ?
C19 H19A 0.9800 . ?
C19 H19B 0.9800 . ?
C19 H19C 0.9800 . ?
C20 H20A 0.9800 . ?
C20 H20B 0.9800 . ?
C20 H20C 0.9800 . ?
C21 H21A 0.9800 . ?
C21 H21B 0.9800 . ?
C21 H21C 0.9800 . ?
C22 H22A 0.9800 . ?
C22 H22B 0.9800 . ?
C22 H22C 0.9800 . ?
C23 H23A 0.9800 . ?
C23 H23B 0.9800 . ?
C23 H23C 0.9800 . ?
C24 H24A 0.9800 . ?
C24 H24B 0.9800 . ?
C24 H24C 0.9800 . ?
Sb2 N2 2.067(3) . ?
Sb2 C52A 2.137(5) . ?
Sb2 C52B 2.14(2) . ?
Sb2 Cl3B 2.391(19) . ?
Sb2 Cl3A 2.4067(10) . ?
Si2 N2 1.740(3) . ?
Si2 C53 1.857(4) . ?
Si2 C54A 1.862(15) . ?
Si2 C54B 1.870(17) . ?
Si2 Cl4A 2.014(4) . ?
Si2 Cl4B 2.020(6) . ?
C52A H52A 0.9800 . ?
C52A H52B 0.9800 . ?
C52A H52C 0.9800 . ?
C52B H52D 0.9800 . ?
C52B H52E 0.9800 . ?
C52B H52F 0.9800 . ?
C54A H54A 0.9800 . ?
C54A H54B 0.9800 . ?
C54A H54C 0.9800 . ?
C54B H54D 0.9800 . ?
C54B H54E 0.9800 . ?
C54B H54F 0.9800 . ?
N2 C28 1.441(4) . ?
C27 H27A 0.9800 . ?
C27 H27B 0.9800 . ?
C27 H27C 0.9800 . ?
C28 C33 1.419(4) . ?
C28 C29 1.421(5) . ?
C29 C30 1.396(5) . ?
C29 C34 1.492(5) . ?
C30 C31 1.371(5) . ?
C30 H30 0.9500 . ?
C31 C32 1.375(5) . ?
C31 H31 0.9500 . ?
C32 C33 1.401(5) . ?
C32 H32 0.9500 . ?
C33 C40 1.497(5) . ?
C34 C39 1.401(5) . ?
C34 C35 1.410(5) . ?
C35 C36 1.393(5) . ?
C35 C46 1.495(5) . ?
C36 C37 1.370(5) . ?
C36 H36 0.9500 . ?
C37 C38 1.390(5) . ?
C37 C47 1.517(5) . ?
C38 C39 1.395(5) . ?
C38 H38 0.9500 . ?
C39 C48 1.518(5) . ?
C40 C41 1.399(5) . ?
C40 C45 1.405(5) . ?
C41 C42 1.390(5) . ?
C41 C49 1.500(5) . ?
C42 C43 1.388(5) . ?
C42 H42 0.9500 . ?
C43 C44 1.375(5) . ?
C43 C50 1.506(5) . ?
C44 C45 1.398(5) . ?
C44 H44 0.9500 . ?
C45 C51 1.508(5) . ?
C46 H46A 0.9800 . ?
C46 H46B 0.9800 . ?
C46 H46C 0.9800 . ?
C47 H47A 0.9800 . ?
C47 H47B 0.9800 . ?
C47 H47C 0.9800 . ?
C48 H48A 0.9800 . ?
C48 H48B 0.9800 . ?
C48 H48C 0.9800 . ?
C49 H49A 0.9800 . ?
C49 H49B 0.9800 . ?
C49 H49C 0.9800 . ?
C50 H50A 0.9800 . ?
C50 H50B 0.9800 . ?
C50 H50C 0.9800 . ?
C51 H51A 0.9800 . ?
C51 H51B 0.9800 . ?
C51 H51C 0.9800 . ?
Sb3 N3 2.072(3) . ?
Sb3 C79A 2.149(5) . ?
Sb3 C79B 2.1500(10) . ?
Sb3 Cl5B 2.400(19) . ?
Sb3 Cl5A 2.4045(7) . ?
Si3 N3 1.740(3) . ?
Si3 C80 1.842(4) . ?
Si3 C81A 1.870(15) . ?
Si3 C81B 1.878(16) . ?
Si3 Cl6A 2.022(4) . ?
Si3 Cl6B 2.030(4) . ?
C79A H79A 0.9800 . ?
C79A H79B 0.9800 . ?
C79A H79C 0.9800 . ?
C79B H79D 0.9800 . ?
C79B H79E 0.9800 . ?
C79B H79F 0.9800 . ?
C81A H81A 0.9800 . ?
C81A H81B 0.9800 . ?
C81A H81C 0.9800 . ?
C81B H81D 0.9800 . ?
C81B H81E 0.9800 . ?
C81B H81F 0.9800 . ?
N3 C55 1.442(4) . ?
C53 H53A 0.9800 . ?
C53 H53B 0.9800 . ?
C53 H53C 0.9800 . ?
C55 C56 1.413(5) . ?
C55 C60 1.416(4) . ?
C56 C57 1.391(5) . ?
C56 C61 1.502(5) . ?
C57 C58 1.386(5) . ?
C57 H57 0.9500 . ?
C58 C59 1.366(5) . ?
C58 H58 0.9500 . ?
C59 C60 1.397(5) . ?
C59 H59 0.9500 . ?
C60 C67 1.501(5) . ?
C61 C66 1.403(5) . ?
C61 C62 1.409(5) . ?
C62 C63 1.388(5) . ?
C62 C73 1.500(5) . ?
C63 C64 1.388(5) . ?
C63 H63 0.9500 . ?
C64 C65 1.383(5) . ?
C64 C74 1.504(5) . ?
C65 C66 1.408(5) . ?
C65 H65 0.9500 . ?
C66 C75 1.523(5) . ?
C67 C72 1.399(5) . ?
C67 C68 1.403(5) . ?
C68 C69 1.388(5) . ?
C68 C76 1.511(5) . ?
C69 C70 1.378(5) . ?
C69 H69 0.9500 . ?
C70 C71 1.378(6) . ?
C70 C77 1.517(6) . ?
C71 C72 1.405(5) . ?
C71 H71 0.9500 . ?
C72 C78 1.507(5) . ?
C73 H73A 0.9800 . ?
C73 H73B 0.9800 . ?
C73 H73C 0.9800 . ?
C74 H74A 0.9800 . ?
C74 H74B 0.9800 . ?
C74 H74C 0.9800 . ?
C75 H75A 0.9800 . ?
C75 H75B 0.9800 . ?
C75 H75C 0.9800 . ?
C76 H76A 0.9800 . ?
C76 H76B 0.9800 . ?
C76 H76C 0.9800 . ?
C77 H77A 0.9800 . ?
C77 H77B 0.9800 . ?
C77 H77C 0.9800 . ?
C78 H78A 0.9800 . ?
C78 H78B 0.9800 . ?
C78 H78C 0.9800 . ?
Sb4 N4 2.068(3) . ?
Sb4 C106 2.151(5) . ?
Sb4 C137 2.16(2) . ?
Sb4 Cl7B 2.391(19) . ?
Sb4 Cl7A 2.4074(10) . ?
Si4 N4 1.744(3) . ?
Si4 C138 1.830(18) . ?
Si4 C107 1.844(11) . ?
Si4 C108 1.847(3) . ?
Si4 Cl8B 2.014(13) . ?
Si4 Cl8A 2.0531(18) . ?
C106 H10A 0.9800 . ?
C106 H10B 0.9800 . ?
C106 H10C 0.9800 . ?
C137 H13A 0.9800 . ?
C137 H13B 0.9800 . ?
C137 H13C 0.9800 . ?
C107 H10D 0.9800 . ?
C107 H10E 0.9800 . ?
C107 H10F 0.9800 . ?
C138 H18A 0.9800 . ?
C138 H18B 0.9800 . ?
C138 H18C 0.9800 . ?
N4 C82 1.436(4) . ?
C80 H80A 0.9800 . ?
C80 H80B 0.9800 . ?
C80 H80C 0.9800 . ?
C82 C83 1.415(4) . ?
C82 C87 1.419(4) . ?
C83 C84 1.389(5) . ?
C83 C88 1.501(4) . ?
C84 C85 1.366(5) . ?
C84 H84 0.9500 . ?
C85 C86 1.382(5) . ?
C85 H85 0.9500 . ?
C86 C87 1.384(5) . ?
C86 H86 0.9500 . ?
C87 C94 1.504(5) . ?
C88 C93 1.409(5) . ?
C88 C89 1.413(5) . ?
C89 C90 1.387(5) . ?
C89 C100 1.493(5) . ?
C90 C91 1.377(5) . ?
C90 H90 0.9500 . ?
C91 C92 1.387(5) . ?
C91 C101 1.511(5) . ?
C92 C93 1.404(5) . ?
C92 H92 0.9500 . ?
C93 C102 1.508(5) . ?
C94 C95 1.400(5) . ?
C94 C99 1.415(5) . ?
C95 C96 1.392(5) . ?
C95 C103 1.504(5) . ?
C96 C97 1.382(5) . ?
C96 H96 0.9500 . ?
C97 C98 1.389(5) . ?
C97 C104 1.506(5) . ?
C98 C99 1.398(5) . ?
C98 H98 0.9500 . ?
C99 C105 1.505(5) . ?
C100 H10G 0.9800 . ?
C100 H10H 0.9800 . ?
C100 H10I 0.9800 . ?
C101 H10J 0.9800 . ?
C101 H10K 0.9800 . ?
C101 H10L 0.9800 . ?
C102 H10M 0.9800 . ?
C102 H10N 0.9800 . ?
C102 H10O 0.9800 . ?
C103 H10P 0.9800 . ?
C103 H10Q 0.9800 . ?
C103 H10R 0.9800 . ?
C104 H10S 0.9800 . ?
C104 H10T 0.9800 . ?
C104 H10U 0.9800 . ?
C105 H10V 0.9800 . ?
C105 H10W 0.9800 . ?
C105 H10X 0.9800 . ?
C108 H10Y 0.9800 . ?
C108 H10Z 0.9800 . ?
C108 H10 0.9800 . ?
C109 C110 1.482(10) . ?
C109 H11B 0.9800 . ?
C109 H11C 0.9800 . ?
C109 H11D 0.9800 . ?
C110 C111 1.3900 . ?
C110 C115 1.3900 . ?
C111 C112 1.3900 . ?
C111 H111 0.9500 . ?
C112 C113 1.3900 . ?
C112 H112 0.9500 . ?
C113 C114 1.3900 . ?
C113 H113 0.9500 . ?
C114 C115 1.3900 . ?
C114 H114 0.9500 . ?
C115 H115 0.9500 . ?
C116 C117 1.445(16) . ?
C116 H11E 0.9800 . ?
C116 H11F 0.9800 . ?
C116 H11G 0.9800 . ?
C117 C122 1.3900 . ?
C117 C118 1.3900 . ?
C122 C121 1.3900 . ?
C122 H122 0.9500 . ?
C121 C120 1.3900 . ?
C121 H121 0.9500 . ?
C120 C119 1.3900 . ?
C120 H120 0.9500 . ?
C119 C118 1.3900 . ?
C119 H119 0.9500 . ?
C118 H118 0.9500 . ?
C123 C124 1.492(14) . ?
C123 H12A 0.9800 . ?
C123 H12B 0.9800 . ?
C123 H12C 0.9800 . ?
C124 C125 1.3900 . ?
C124 C129 1.3900 . ?
C125 C126 1.3900 . ?
C125 H125 0.9500 . ?
C126 C127 1.3900 . ?
C126 H126 0.9500 . ?
C127 C128 1.3900 . ?
C127 H127 0.9500 . ?
C128 C129 1.3900 . ?
C128 H128 0.9500 . ?
C129 H129 0.9500 . ?
C130 C131 1.482(15) . ?
C130 H13D 0.9800 . ?
C130 H13E 0.9800 . ?
C130 H13F 0.9800 . ?
C131 C132 1.3900 . ?
C131 C136 1.3900 . ?
C132 C133 1.3900 . ?
C132 H132 0.9500 . ?
C133 C134 1.3900 . ?
C133 H133 0.9500 . ?
C134 C135 1.3900 . ?
C134 H134 0.9500 . ?
C135 C136 1.3900 . ?
C135 H135 0.9500 . ?
C136 H136 0.9500 . ?
C145 C143 1.474(15) . ?
C145 H14A 0.9800 . ?
C145 H14B 0.9800 . ?
C145 H14C 0.9800 . ?
C139 C140 1.3900 . ?
C139 C144 1.3900 . ?
C139 H139 0.9500 . ?
C140 C141 1.3900 . ?
C140 H140 0.9500 . ?
C141 C142 1.3900 . ?
C141 H141 0.9500 . ?
C142 C143 1.3900 . ?
C142 H142 0.9500 . ?
C143 C144 1.3900 . ?
C144 H144 0.9500 . ?
 
loop_
 _geom_angle_atom_site_label_1
 _geom_angle_atom_site_label_2
 _geom_angle_atom_site_label_3
 _geom_angle
 _geom_angle_site_symmetry_1
 _geom_angle_site_symmetry_3
 _geom_angle_publ_flag
N1 Sb1 C25B 98.1(19) . . ?
N1 Sb1 C25A 105.5(3) . . ?
C25B Sb1 C25A 85(3) . . ?
N1 Sb1 Cl1B 104.9(12) . . ?
C25B Sb1 Cl1B 90(4) . . ?
C25A Sb1 Cl1B 5.0(12) . . ?
N1 Sb1 Cl1A 96.36(8) . . ?
C25B Sb1 Cl1A 5(3) . . ?
C25A Sb1 Cl1A 90.0(2) . . ?
Cl1B Sb1 Cl1A 95.0(10) . . ?
N1 Si1 C26B 107(2) . . ?
N1 Si1 C26A 110.5(7) . . ?
C26B Si1 C26A 102(2) . . ?
N1 Si1 C27 117.66(15) . . ?
C26B Si1 C27 111(2) . . ?
C26A Si1 C27 107.7(7) . . ?
N1 Si1 Cl2B 111.9(8) . . ?
C26B Si1 Cl2B 99(2) . . ?
C26A Si1 Cl2B 2.6(15) . . ?
C27 Si1 Cl2B 108.5(8) . . ?
N1 Si1 Cl2A 107.92(14) . . ?
C26B Si1 Cl2A 4(2) . . ?
C26A Si1 Cl2A 104.9(7) . . ?
C27 Si1 Cl2A 107.36(15) . . ?
Cl2B Si1 Cl2A 102.3(8) . . ?
Sb1 C25A H25A 109.5 . . ?
Sb1 C25A H25B 109.5 . . ?
Sb1 C25A H25C 109.5 . . ?
Sb1 C25B H25D 109.5 . . ?
Sb1 C25B H25E 109.5 . . ?
H25D C25B H25E 109.5 . . ?
Sb1 C25B H25F 109.5 . . ?
H25D C25B H25F 109.5 . . ?
H25E C25B H25F 109.5 . . ?
Si1 C26A H26A 109.5 . . ?
Si1 C26A H26B 109.5 . . ?
H26A C26A H26B 109.5 . . ?
Si1 C26A H26C 109.5 . . ?
H26A C26A H26C 109.5 . . ?
H26B C26A H26C 109.5 . . ?
Si1 C26B H26D 109.5 . . ?
Si1 C26B H26E 109.5 . . ?
H26D C26B H26E 109.5 . . ?
Si1 C26B H26F 109.5 . . ?
H26D C26B H26F 109.5 . . ?
H26E C26B H26F 109.5 . . ?
C1 N1 Si1 124.1(2) . . ?
C1 N1 Sb1 111.6(2) . . ?
Si1 N1 Sb1 124.24(14) . . ?
C6 C1 C2 118.3(3) . . ?
C6 C1 N1 119.9(3) . . ?
C2 C1 N1 121.8(3) . . ?
C3 C2 C1 118.4(3) . . ?
C3 C2 C7 114.9(3) . . ?
C1 C2 C7 126.7(3) . . ?
C4 C3 C2 122.8(3) . . ?
C4 C3 H3 118.6 . . ?
C2 C3 H3 118.6 . . ?
C3 C4 C5 118.8(3) . . ?
C3 C4 H4 120.6 . . ?
C5 C4 H4 120.6 . . ?
C6 C5 C4 120.5(3) . . ?
C6 C5 H5 119.7 . . ?
C4 C5 H5 119.7 . . ?
C5 C6 C1 120.9(3) . . ?
C5 C6 C13 115.9(3) . . ?
C1 C6 C13 123.2(3) . . ?
C8 C7 C12 119.1(3) . . ?
C8 C7 C2 120.2(3) . . ?
C12 C7 C2 120.2(3) . . ?
C9 C8 C7 119.5(3) . . ?
C9 C8 C19 117.1(3) . . ?
C7 C8 C19 123.3(3) . . ?
C10 C9 C8 122.1(3) . . ?
C10 C9 H9 118.9 . . ?
C8 C9 H9 118.9 . . ?
C9 C10 C11 117.6(3) . . ?
C9 C10 C20 121.2(3) . . ?
C11 C10 C20 121.2(3) . . ?
C12 C11 C10 122.8(3) . . ?
C12 C11 H11 118.6 . . ?
C10 C11 H11 118.6 . . ?
C11 C12 C7 118.9(3) . . ?
C11 C12 C21 117.9(3) . . ?
C7 C12 C21 123.2(3) . . ?
C18 C13 C14 119.6(3) . . ?
C18 C13 C6 120.8(3) . . ?
C14 C13 C6 119.2(3) . . ?
C15 C14 C13 119.2(3) . . ?
C15 C14 C22 118.6(3) . . ?
C13 C14 C22 122.2(3) . . ?
C16 C15 C14 121.4(4) . . ?
C16 C15 H15 119.3 . . ?
C14 C15 H15 119.3 . . ?
C17 C16 C15 118.3(3) . . ?
C17 C16 C23 120.7(3) . . ?
C15 C16 C23 121.0(4) . . ?
C16 C17 C18 122.6(3) . . ?
C16 C17 H17 118.7 . . ?
C18 C17 H17 118.7 . . ?
C17 C18 C13 118.7(3) . . ?
C17 C18 C24 120.1(3) . . ?
C13 C18 C24 121.2(3) . . ?
C8 C19 H19A 109.5 . . ?
C8 C19 H19B 109.5 . . ?
H19A C19 H19B 109.5 . . ?
C8 C19 H19C 109.5 . . ?
H19A C19 H19C 109.5 . . ?
H19B C19 H19C 109.5 . . ?
C10 C20 H20A 109.5 . . ?
C10 C20 H20B 109.5 . . ?
H20A C20 H20B 109.5 . . ?
C10 C20 H20C 109.5 . . ?
H20A C20 H20C 109.5 . . ?
H20B C20 H20C 109.5 . . ?
C12 C21 H21A 109.5 . . ?
C12 C21 H21B 109.5 . . ?
H21A C21 H21B 109.5 . . ?
C12 C21 H21C 109.5 . . ?
H21A C21 H21C 109.5 . . ?
H21B C21 H21C 109.5 . . ?
C14 C22 H22A 109.5 . . ?
C14 C22 H22B 109.5 . . ?
H22A C22 H22B 109.5 . . ?
C14 C22 H22C 109.5 . . ?
H22A C22 H22C 109.5 . . ?
H22B C22 H22C 109.5 . . ?
C16 C23 H23A 109.5 . . ?
C16 C23 H23B 109.5 . . ?
H23A C23 H23B 109.5 . . ?
C16 C23 H23C 109.5 . . ?
H23A C23 H23C 109.5 . . ?
H23B C23 H23C 109.5 . . ?
C18 C24 H24A 109.5 . . ?
C18 C24 H24B 109.5 . . ?
H24A C24 H24B 109.5 . . ?
C18 C24 H24C 109.5 . . ?
H24A C24 H24C 109.5 . . ?
H24B C24 H24C 109.5 . . ?
N2 Sb2 C52A 103.58(19) . . ?
N2 Sb2 C52B 91(4) . . ?
C52A Sb2 C52B 97(5) . . ?
N2 Sb2 Cl3B 109.9(11) . . ?
C52A Sb2 Cl3B 6.8(11) . . ?
C52B Sb2 Cl3B 95(5) . . ?
N2 Sb2 Cl3A 96.15(8) . . ?
C52A Sb2 Cl3A 91.8(2) . . ?
C52B Sb2 Cl3A 7(4) . . ?
Cl3B Sb2 Cl3A 88.6(12) . . ?
N2 Si2 C53 117.31(16) . . ?
N2 Si2 C54A 109.9(11) . . ?
C53 Si2 C54A 107.1(10) . . ?
N2 Si2 C54B 108.7(13) . . ?
C53 Si2 C54B 111.3(12) . . ?
C54A Si2 C54B 101.3(16) . . ?
N2 Si2 Cl4A 109.1(2) . . ?
C53 Si2 Cl4A 108.7(2) . . ?
C54A Si2 Cl4A 103.9(11) . . ?
C54B Si2 Cl4A 3.2(14) . . ?
N2 Si2 Cl4B 110.5(3) . . ?
C53 Si2 Cl4B 106.8(4) . . ?
C54A Si2 Cl4B 0.6(14) . . ?
C54B Si2 Cl4B 100.9(13) . . ?
Cl4A Si2 Cl4B 103.5(4) . . ?
Sb2 C52A H52A 109.5 . . ?
Sb2 C52A H52B 109.5 . . ?
Sb2 C52A H52C 109.5 . . ?
Sb2 C52B H52D 109.5 . . ?
Sb2 C52B H52E 109.5 . . ?
H52D C52B H52E 109.5 . . ?
Sb2 C52B H52F 109.5 . . ?
H52D C52B H52F 109.5 . . ?
H52E C52B H52F 109.5 . . ?
Si2 C54A H54A 109.5 . . ?
Si2 C54A H54B 109.5 . . ?
H54A C54A H54B 109.5 . . ?
Si2 C54A H54C 109.5 . . ?
H54A C54A H54C 109.5 . . ?
H54B C54A H54C 109.5 . . ?
Si2 C54B H54D 109.5 . . ?
Si2 C54B H54E 109.5 . . ?
H54D C54B H54E 109.5 . . ?
Si2 C54B H54F 109.5 . . ?
H54D C54B H54F 109.5 . . ?
H54E C54B H54F 109.5 . . ?
C28 N2 Si2 123.6(2) . . ?
C28 N2 Sb2 111.2(2) . . ?
Si2 N2 Sb2 125.11(15) . . ?
Si1 C27 H27A 109.5 . . ?
Si1 C27 H27B 109.5 . . ?
H27A C27 H27B 109.5 . . ?
Si1 C27 H27C 109.5 . . ?
H27A C27 H27C 109.5 . . ?
H27B C27 H27C 109.5 . . ?
C33 C28 C29 118.6(3) . . ?
C33 C28 N2 121.9(3) . . ?
C29 C28 N2 119.5(3) . . ?
C30 C29 C28 119.8(3) . . ?
C30 C29 C34 117.0(3) . . ?
C28 C29 C34 123.2(3) . . ?
C31 C30 C29 121.2(4) . . ?
C31 C30 H30 119.4 . . ?
C29 C30 H30 119.4 . . ?
C30 C31 C32 119.5(3) . . ?
C30 C31 H31 120.3 . . ?
C32 C31 H31 120.3 . . ?
C31 C32 C33 122.2(3) . . ?
C31 C32 H32 118.9 . . ?
C33 C32 H32 118.9 . . ?
C32 C33 C28 118.6(3) . . ?
C32 C33 C40 117.3(3) . . ?
C28 C33 C40 124.0(3) . . ?
C39 C34 C35 119.2(3) . . ?
C39 C34 C29 119.4(3) . . ?
C35 C34 C29 121.1(3) . . ?
C36 C35 C34 118.9(3) . . ?
C36 C35 C46 119.4(3) . . ?
C34 C35 C46 121.8(3) . . ?
C37 C36 C35 122.7(4) . . ?
C37 C36 H36 118.6 . . ?
C35 C36 H36 118.6 . . ?
C36 C37 C38 117.9(3) . . ?
C36 C37 C47 120.9(4) . . ?
C38 C37 C47 121.1(4) . . ?
C37 C38 C39 121.8(4) . . ?
C37 C38 H38 119.1 . . ?
C39 C38 H38 119.1 . . ?
C38 C39 C34 119.4(3) . . ?
C38 C39 C48 117.9(3) . . ?
C34 C39 C48 122.6(3) . . ?
C41 C40 C45 119.6(3) . . ?
C41 C40 C33 120.9(3) . . ?
C45 C40 C33 119.2(3) . . ?
C42 C41 C40 118.3(3) . . ?
C42 C41 C49 117.8(3) . . ?
C40 C41 C49 123.9(3) . . ?
C43 C42 C41 123.4(4) . . ?
C43 C42 H42 118.3 . . ?
C41 C42 H42 118.3 . . ?
C44 C43 C42 117.0(4) . . ?
C44 C43 C50 121.3(4) . . ?
C42 C43 C50 121.7(4) . . ?
C43 C44 C45 122.4(4) . . ?
C43 C44 H44 118.8 . . ?
C45 C44 H44 118.8 . . ?
C44 C45 C40 119.1(3) . . ?
C44 C45 C51 117.4(3) . . ?
C40 C45 C51 123.5(3) . . ?
C35 C46 H46A 109.5 . . ?
C35 C46 H46B 109.5 . . ?
H46A C46 H46B 109.5 . . ?
C35 C46 H46C 109.5 . . ?
H46A C46 H46C 109.5 . . ?
H46B C46 H46C 109.5 . . ?
C37 C47 H47A 109.5 . . ?
C37 C47 H47B 109.5 . . ?
H47A C47 H47B 109.5 . . ?
C37 C47 H47C 109.5 . . ?
H47A C47 H47C 109.5 . . ?
H47B C47 H47C 109.5 . . ?
C39 C48 H48A 109.5 . . ?
C39 C48 H48B 109.5 . . ?
H48A C48 H48B 109.5 . . ?
C39 C48 H48C 109.5 . . ?
H48A C48 H48C 109.5 . . ?
H48B C48 H48C 109.5 . . ?
C41 C49 H49A 109.5 . . ?
C41 C49 H49B 109.5 . . ?
H49A C49 H49B 109.5 . . ?
C41 C49 H49C 109.5 . . ?
H49A C49 H49C 109.5 . . ?
H49B C49 H49C 109.5 . . ?
C43 C50 H50A 109.5 . . ?
C43 C50 H50B 109.5 . . ?
H50A C50 H50B 109.5 . . ?
C43 C50 H50C 109.5 . . ?
H50A C50 H50C 109.5 . . ?
H50B C50 H50C 109.5 . . ?
C45 C51 H51A 109.5 . . ?
C45 C51 H51B 109.5 . . ?
H51A C51 H51B 109.5 . . ?
C45 C51 H51C 109.5 . . ?
H51A C51 H51C 109.5 . . ?
H51B C51 H51C 109.5 . . ?
N3 Sb3 C79A 105.8(4) . . ?
N3 Sb3 C79B 99(2) . . ?
C79A Sb3 C79B 87(4) . . ?
N3 Sb3 Cl5B 107.3(15) . . ?
C79A Sb3 Cl5B 2.1(19) . . ?
C79B Sb3 Cl5B 88(4) . . ?
N3 Sb3 Cl5A 96.99(8) . . ?
C79A Sb3 Cl5A 91.2(4) . . ?
C79B Sb3 Cl5A 4(4) . . ?
Cl5B Sb3 Cl5A 92.4(16) . . ?
N3 Si3 C80 117.38(16) . . ?
N3 Si3 C81A 106.7(10) . . ?
C80 Si3 C81A 107.1(11) . . ?
N3 Si3 C81B 111.0(11) . . ?
C80 Si3 C81B 106.6(10) . . ?
C81A Si3 C81B 107.7(14) . . ?
N3 Si3 Cl6A 108.8(3) . . ?
C80 Si3 Cl6A 110.7(2) . . ?
C81A Si3 Cl6A 105.4(10) . . ?
C81B Si3 Cl6A 4.2(12) . . ?
N3 Si3 Cl6B 109.7(2) . . ?
C80 Si3 Cl6B 106.6(3) . . ?
C81A Si3 Cl6B 3.5(12) . . ?
C81B Si3 Cl6B 104.8(11) . . ?
Cl6A Si3 Cl6B 102.6(3) . . ?
Sb3 C79A H79A 109.5 . . ?
Sb3 C79A H79B 109.5 . . ?
Sb3 C79A H79C 109.5 . . ?
Sb3 C79B H79D 109.5 . . ?
Sb3 C79B H79E 109.5 . . ?
H79D C79B H79E 109.5 . . ?
Sb3 C79B H79F 109.5 . . ?
H79D C79B H79F 109.5 . . ?
H79E C79B H79F 109.5 . . ?
Si3 C81A H81A 109.5 . . ?
Si3 C81A H81B 109.5 . . ?
H81A C81A H81B 109.5 . . ?
Si3 C81A H81C 109.5 . . ?
H81A C81A H81C 109.5 . . ?
H81B C81A H81C 109.5 . . ?
Si3 C81B H81D 109.5 . . ?
Si3 C81B H81E 109.5 . . ?
H81D C81B H81E 109.5 . . ?
Si3 C81B H81F 109.5 . . ?
H81D C81B H81F 109.5 . . ?
H81E C81B H81F 109.5 . . ?
C55 N3 Si3 124.1(2) . . ?
C55 N3 Sb3 110.9(2) . . ?
Si3 N3 Sb3 124.97(14) . . ?
Si2 C53 H53A 109.5 . . ?
Si2 C53 H53B 109.5 . . ?
H53A C53 H53B 109.5 . . ?
Si2 C53 H53C 109.5 . . ?
H53A C53 H53C 109.5 . . ?
H53B C53 H53C 109.5 . . ?
C56 C55 C60 118.4(3) . . ?
C56 C55 N3 119.1(3) . . ?
C60 C55 N3 122.5(3) . . ?
C57 C56 C55 120.4(3) . . ?
C57 C56 C61 115.2(3) . . ?
C55 C56 C61 124.4(3) . . ?
C58 C57 C56 120.8(4) . . ?
C58 C57 H57 119.6 . . ?
C56 C57 H57 119.6 . . ?
C59 C58 C57 118.9(3) . . ?
C59 C58 H58 120.6 . . ?
C57 C58 H58 120.6 . . ?
C58 C59 C60 122.8(3) . . ?
C58 C59 H59 118.6 . . ?
C60 C59 H59 118.6 . . ?
C59 C60 C55 118.5(3) . . ?
C59 C60 C67 114.5(3) . . ?
C55 C60 C67 126.9(3) . . ?
C66 C61 C62 119.5(3) . . ?
C66 C61 C56 119.2(3) . . ?
C62 C61 C56 120.9(3) . . ?
C63 C62 C61 119.2(3) . . ?
C63 C62 C73 119.6(3) . . ?
C61 C62 C73 121.2(3) . . ?
C62 C63 C64 122.1(3) . . ?
C62 C63 H63 118.9 . . ?
C64 C63 H63 118.9 . . ?
C65 C64 C63 118.5(3) . . ?
C65 C64 C74 121.6(4) . . ?
C63 C64 C74 120.0(3) . . ?
C64 C65 C66 121.4(4) . . ?
C64 C65 H65 119.3 . . ?
C66 C65 H65 119.3 . . ?
C61 C66 C65 119.3(3) . . ?
C61 C66 C75 122.2(3) . . ?
C65 C66 C75 118.5(3) . . ?
C72 C67 C68 119.2(3) . . ?
C72 C67 C60 119.6(3) . . ?
C68 C67 C60 120.2(3) . . ?
C69 C68 C67 119.5(3) . . ?
C69 C68 C76 117.7(3) . . ?
C67 C68 C76 122.8(3) . . ?
C70 C69 C68 122.4(4) . . ?
C70 C69 H69 118.8 . . ?
C68 C69 H69 118.8 . . ?
C69 C70 C71 117.6(4) . . ?
C69 C70 C77 121.7(4) . . ?
C71 C70 C77 120.6(4) . . ?
C70 C71 C72 122.4(4) . . ?
C70 C71 H71 118.8 . . ?
C72 C71 H71 118.8 . . ?
C67 C72 C71 118.8(3) . . ?
C67 C72 C78 123.6(3) . . ?
C71 C72 C78 117.6(3) . . ?
C62 C73 H73A 109.5 . . ?
C62 C73 H73B 109.5 . . ?
H73A C73 H73B 109.5 . . ?
C62 C73 H73C 109.5 . . ?
H73A C73 H73C 109.5 . . ?
H73B C73 H73C 109.5 . . ?
C64 C74 H74A 109.5 . . ?
C64 C74 H74B 109.5 . . ?
H74A C74 H74B 109.5 . . ?
C64 C74 H74C 109.5 . . ?
H74A C74 H74C 109.5 . . ?
H74B C74 H74C 109.5 . . ?
C66 C75 H75A 109.5 . . ?
C66 C75 H75B 109.5 . . ?
H75A C75 H75B 109.5 . . ?
C66 C75 H75C 109.5 . . ?
H75A C75 H75C 109.5 . . ?
H75B C75 H75C 109.5 . . ?
C68 C76 H76A 109.5 . . ?
C68 C76 H76B 109.5 . . ?
H76A C76 H76B 109.5 . . ?
C68 C76 H76C 109.5 . . ?
H76A C76 H76C 109.5 . . ?
H76B C76 H76C 109.5 . . ?
C70 C77 H77A 109.5 . . ?
C70 C77 H77B 109.5 . . ?
H77A C77 H77B 109.5 . . ?
C70 C77 H77C 109.5 . . ?
H77A C77 H77C 109.5 . . ?
H77B C77 H77C 109.5 . . ?
C72 C78 H78A 109.5 . . ?
C72 C78 H78B 109.5 . . ?
H78A C78 H78B 109.5 . . ?
C72 C78 H78C 109.5 . . ?
H78A C78 H78C 109.5 . . ?
H78B C78 H78C 109.5 . . ?
N4 Sb4 C106 104.90(19) . . ?
N4 Sb4 C137 89(4) . . ?
C106 Sb4 C137 94(5) . . ?
N4 Sb4 Cl7B 99.1(13) . . ?
C106 Sb4 Cl7B 7.3(13) . . ?
C137 Sb4 Cl7B 90(5) . . ?
N4 Sb4 Cl7A 97.26(8) . . ?
C106 Sb4 Cl7A 91.11(19) . . ?
C137 Sb4 Cl7A 8(4) . . ?
Cl7B Sb4 Cl7A 87.5(13) . . ?
N4 Si4 C138 110(2) . . ?
N4 Si4 C107 110.6(8) . . ?
C138 Si4 C107 101.6(19) . . ?
N4 Si4 C108 116.78(15) . . ?
C138 Si4 C108 110(2) . . ?
C107 Si4 C108 106.5(7) . . ?
N4 Si4 Cl8B 110.9(8) . . ?
C138 Si4 Cl8B 99(2) . . ?
C107 Si4 Cl8B 2.9(15) . . ?
C108 Si4 Cl8B 108.6(8) . . ?
N4 Si4 Cl8A 108.31(13) . . ?
C138 Si4 Cl8A 5.1(19) . . ?
C107 Si4 Cl8A 106.6(7) . . ?
C108 Si4 Cl8A 107.50(15) . . ?
Cl8B Si4 Cl8A 103.9(8) . . ?
Sb4 C106 H10A 109.5 . . ?
Sb4 C106 H10B 109.5 . . ?
Sb4 C106 H10C 109.5 . . ?
Sb4 C137 H13A 109.5 . . ?
Sb4 C137 H13B 109.5 . . ?
H13A C137 H13B 109.5 . . ?
Sb4 C137 H13C 109.5 . . ?
H13A C137 H13C 109.5 . . ?
H13B C137 H13C 109.5 . . ?
Si4 C107 H10D 109.5 . . ?
Si4 C107 H10E 109.5 . . ?
H10D C107 H10E 109.5 . . ?
Si4 C107 H10F 109.5 . . ?
H10D C107 H10F 109.5 . . ?
H10E C107 H10F 109.5 . . ?
Si4 C138 H18A 109.5 . . ?
Si4 C138 H18B 109.5 . . ?
H18A C138 H18B 109.5 . . ?
Si4 C138 H18C 109.5 . . ?
H18A C138 H18C 109.5 . . ?
H18B C138 H18C 109.5 . . ?
C82 N4 Si4 125.2(2) . . ?
C82 N4 Sb4 110.7(2) . . ?
Si4 N4 Sb4 124.04(14) . . ?
Si3 C80 H80A 109.5 . . ?
Si3 C80 H80B 109.5 . . ?
H80A C80 H80B 109.5 . . ?
Si3 C80 H80C 109.5 . . ?
H80A C80 H80C 109.5 . . ?
H80B C80 H80C 109.5 . . ?
C83 C82 C87 118.2(3) . . ?
C83 C82 N4 119.2(3) . . ?
C87 C82 N4 122.6(3) . . ?
C84 C83 C82 120.2(3) . . ?
C84 C83 C88 117.1(3) . . ?
C82 C83 C88 122.7(3) . . ?
C85 C84 C83 121.4(3) . . ?
C85 C84 H84 119.3 . . ?
C83 C84 H84 119.3 . . ?
C84 C85 C86 118.9(3) . . ?
C84 C85 H85 120.5 . . ?
C86 C85 H85 120.5 . . ?
C85 C86 C87 122.4(3) . . ?
C85 C86 H86 118.8 . . ?
C87 C86 H86 118.8 . . ?
C86 C87 C82 118.9(3) . . ?
C86 C87 C94 115.9(3) . . ?
C82 C87 C94 125.2(3) . . ?
C93 C88 C89 118.9(3) . . ?
C93 C88 C83 119.8(3) . . ?
C89 C88 C83 120.9(3) . . ?
C90 C89 C88 119.2(3) . . ?
C90 C89 C100 119.2(3) . . ?
C88 C89 C100 121.5(3) . . ?
C91 C90 C89 122.7(3) . . ?
C91 C90 H90 118.7 . . ?
C89 C90 H90 118.7 . . ?
C90 C91 C92 118.2(3) . . ?
C90 C91 C101 121.3(4) . . ?
C92 C91 C101 120.5(4) . . ?
C91 C92 C93 121.5(4) . . ?
C91 C92 H92 119.2 . . ?
C93 C92 H92 119.2 . . ?
C92 C93 C88 119.3(3) . . ?
C92 C93 C102 118.2(3) . . ?
C88 C93 C102 122.5(3) . . ?
C95 C94 C99 119.3(3) . . ?
C95 C94 C87 120.4(3) . . ?
C99 C94 C87 119.8(3) . . ?
C96 C95 C94 119.7(3) . . ?
C96 C95 C103 117.8(3) . . ?
C94 C95 C103 122.5(3) . . ?
C97 C96 C95 122.3(4) . . ?
C97 C96 H96 118.8 . . ?
C95 C96 H96 118.8 . . ?
C96 C97 C98 117.5(3) . . ?
C96 C97 C104 122.3(4) . . ?
C98 C97 C104 120.1(4) . . ?
C97 C98 C99 122.6(4) . . ?
C97 C98 H98 118.7 . . ?
C99 C98 H98 118.7 . . ?
C98 C99 C94 118.6(3) . . ?
C98 C99 C105 117.9(3) . . ?
C94 C99 C105 123.5(3) . . ?
C89 C100 H10G 109.5 . . ?
C89 C100 H10H 109.5 . . ?
H10G C100 H10H 109.5 . . ?
C89 C100 H10I 109.5 . . ?
H10G C100 H10I 109.5 . . ?
H10H C100 H10I 109.5 . . ?
C91 C101 H10J 109.5 . . ?
C91 C101 H10K 109.5 . . ?
H10J C101 H10K 109.5 . . ?
C91 C101 H10L 109.5 . . ?
H10J C101 H10L 109.5 . . ?
H10K C101 H10L 109.5 . . ?
C93 C102 H10M 109.5 . . ?
C93 C102 H10N 109.5 . . ?
H10M C102 H10N 109.5 . . ?
C93 C102 H10O 109.5 . . ?
H10M C102 H10O 109.5 . . ?
H10N C102 H10O 109.5 . . ?
C95 C103 H10P 109.5 . . ?
C95 C103 H10Q 109.5 . . ?
H10P C103 H10Q 109.5 . . ?
C95 C103 H10R 109.5 . . ?
H10P C103 H10R 109.5 . . ?
H10Q C103 H10R 109.5 . . ?
C97 C104 H10S 109.5 . . ?
C97 C104 H10T 109.5 . . ?
H10S C104 H10T 109.5 . . ?
C97 C104 H10U 109.5 . . ?
H10S C104 H10U 109.5 . . ?
H10T C104 H10U 109.5 . . ?
C99 C105 H10V 109.5 . . ?
C99 C105 H10W 109.5 . . ?
H10V C105 H10W 109.5 . . ?
C99 C105 H10X 109.5 . . ?
H10V C105 H10X 109.5 . . ?
H10W C105 H10X 109.5 . . ?
Si4 C108 H10Y 109.5 . . ?
Si4 C108 H10Z 109.5 . . ?
H10Y C108 H10Z 109.5 . . ?
Si4 C108 H10 109.5 . . ?
H10Y C108 H10 109.5 . . ?
H10Z C108 H10 109.5 . . ?
C110 C109 H11B 109.5 . . ?
C110 C109 H11C 109.5 . . ?
H11B C109 H11C 109.5 . . ?
C110 C109 H11D 109.5 . . ?
H11B C109 H11D 109.5 . . ?
H11C C109 H11D 109.5 . . ?
C111 C110 C115 120.0 . . ?
C111 C110 C109 112.2(9) . . ?
C115 C110 C109 127.8(9) . . ?
C112 C111 C110 120.0 . . ?
C112 C111 H111 120.0 . . ?
C110 C111 H111 120.0 . . ?
C111 C112 C113 120.0 . . ?
C111 C112 H112 120.0 . . ?
C113 C112 H112 120.0 . . ?
C112 C113 C114 120.0 . . ?
C112 C113 H113 120.0 . . ?
C114 C113 H113 120.0 . . ?
C115 C114 C113 120.0 . . ?
C115 C114 H114 120.0 . . ?
C113 C114 H114 120.0 . . ?
C114 C115 C110 120.0 . . ?
C114 C115 H115 120.0 . . ?
C110 C115 H115 120.0 . . ?
C117 C116 H11E 109.5 . . ?
C117 C116 H11F 109.5 . . ?
H11E C116 H11F 109.5 . . ?
C117 C116 H11G 109.5 . . ?
H11E C116 H11G 109.5 . . ?
H11F C116 H11G 109.5 . . ?
C122 C117 C118 120.0 . . ?
C122 C117 C116 124.3(18) . . ?
C118 C117 C116 115.6(18) . . ?
C117 C122 C121 120.0 . . ?
C117 C122 H122 120.0 . . ?
C121 C122 H122 120.0 . . ?
C122 C121 C120 120.0 . . ?
C122 C121 H121 120.0 . . ?
C120 C121 H121 120.0 . . ?
C119 C120 C121 120.0 . . ?
C119 C120 H120 120.0 . . ?
C121 C120 H120 120.0 . . ?
C120 C119 C118 120.0 . . ?
C120 C119 H119 120.0 . . ?
C118 C119 H119 120.0 . . ?
C119 C118 C117 120.0 . . ?
C119 C118 H118 120.0 . . ?
C117 C118 H118 120.0 . . ?
C124 C123 H12A 109.5 . . ?
C124 C123 H12B 109.5 . . ?
H12A C123 H12B 109.5 . . ?
C124 C123 H12C 109.5 . . ?
H12A C123 H12C 109.5 . . ?
H12B C123 H12C 109.5 . . ?
C125 C124 C129 120.0 . . ?
C125 C124 C123 116.5(16) . . ?
C129 C124 C123 123.5(16) . . ?
C124 C125 C126 120.0 . . ?
C124 C125 H125 120.0 . . ?
C126 C125 H125 120.0 . . ?
C125 C126 C127 120.0 . . ?
C125 C126 H126 120.0 . . ?
C127 C126 H126 120.0 . . ?
C126 C127 C128 120.0 . . ?
C126 C127 H127 120.0 . . ?
C128 C127 H127 120.0 . . ?
C129 C128 C127 120.0 . . ?
C129 C128 H128 120.0 . . ?
C127 C128 H128 120.0 . . ?
C128 C129 C124 120.0 . . ?
C128 C129 H129 120.0 . . ?
C124 C129 H129 120.0 . . ?
C131 C130 H13D 109.5 . . ?
C131 C130 H13E 109.5 . . ?
H13D C130 H13E 109.5 . . ?
C131 C130 H13F 109.5 . . ?
H13D C130 H13F 109.5 . . ?
H13E C130 H13F 109.5 . . ?
C132 C131 C136 120.0 . . ?
C132 C131 C130 117.4(19) . . ?
C136 C131 C130 122.5(19) . . ?
C131 C132 C133 120.0 . . ?
C131 C132 H132 120.0 . . ?
C133 C132 H132 120.0 . . ?
C132 C133 C134 120.0 . . ?
C132 C133 H133 120.0 . . ?
C134 C133 H133 120.0 . . ?
C133 C134 C135 120.0 . . ?
C133 C134 H134 120.0 . . ?
C135 C134 H134 120.0 . . ?
C136 C135 C134 120.0 . . ?
C136 C135 H135 120.0 . . ?
C134 C135 H135 120.0 . . ?
C135 C136 C131 120.0 . . ?
C135 C136 H136 120.0 . . ?
C131 C136 H136 120.0 . . ?
C143 C145 H14A 109.5 . . ?
C143 C145 H14B 109.5 . . ?
H14A C145 H14B 109.5 . . ?
C143 C145 H14C 109.5 . . ?
H14A C145 H14C 109.5 . . ?
H14B C145 H14C 109.5 . . ?
C140 C139 C144 120.0 . . ?
C140 C139 H139 120.0 . . ?
C144 C139 H139 120.0 . . ?
C139 C140 C141 120.0 . . ?
C139 C140 H140 120.0 . . ?
C141 C140 H140 120.0 . . ?
C142 C141 C140 120.0 . . ?
C142 C141 H141 120.0 . . ?
C140 C141 H141 120.0 . . ?
C143 C142 C141 120.0 . . ?
C143 C142 H142 120.0 . . ?
C141 C142 H142 120.0 . . ?
C142 C143 C144 120.0 . . ?
C142 C143 C145 116.1(18) . . ?
C144 C143 C145 123.4(18) . . ?
C143 C144 C139 120.0 . . ?
C143 C144 H144 120.0 . . ?
C139 C144 H144 120.0 . . ?
 
loop_
 _geom_torsion_atom_site_label_1
 _geom_torsion_atom_site_label_2
 _geom_torsion_atom_site_label_3
 _geom_torsion_atom_site_label_4
 _geom_torsion
 _geom_torsion_site_symmetry_1
 _geom_torsion_site_symmetry_2
 _geom_torsion_site_symmetry_3
 _geom_torsion_site_symmetry_4
 _geom_torsion_publ_flag
C26B Si1 N1 C1 -30(2) . . . . ?
C26A Si1 N1 C1 -139.7(8) . . . . ?
C27 Si1 N1 C1 96.1(3) . . . . ?
Cl2B Si1 N1 C1 -137.3(8) . . . . ?
Cl2A Si1 N1 C1 -25.5(3) . . . . ?
C26B Si1 N1 Sb1 151(2) . . . . ?
C26A Si1 N1 Sb1 41.0(8) . . . . ?
C27 Si1 N1 Sb1 -83.2(2) . . . . ?
Cl2B Si1 N1 Sb1 43.4(8) . . . . ?
Cl2A Si1 N1 Sb1 155.19(15) . . . . ?
C25B Sb1 N1 C1 -147(3) . . . . ?
C25A Sb1 N1 C1 126.1(3) . . . . ?
Cl1B Sb1 N1 C1 121.0(11) . . . . ?
Cl1A Sb1 N1 C1 -142.07(19) . . . . ?
C25B Sb1 N1 Si1 32(3) . . . . ?
C25A Sb1 N1 Si1 -54.5(3) . . . . ?
Cl1B Sb1 N1 Si1 -59.6(11) . . . . ?
Cl1A Sb1 N1 Si1 37.34(16) . . . . ?
Si1 N1 C1 C6 125.8(3) . . . . ?
Sb1 N1 C1 C6 -54.8(3) . . . . ?
Si1 N1 C1 C2 -54.9(4) . . . . ?
Sb1 N1 C1 C2 124.6(3) . . . . ?
C6 C1 C2 C3 -6.4(5) . . . . ?
N1 C1 C2 C3 174.2(3) . . . . ?
C6 C1 C2 C7 169.8(3) . . . . ?
N1 C1 C2 C7 -9.6(5) . . . . ?
C1 C2 C3 C4 2.5(5) . . . . ?
C7 C2 C3 C4 -174.2(3) . . . . ?
C2 C3 C4 C5 2.8(6) . . . . ?
C3 C4 C5 C6 -4.0(6) . . . . ?
C4 C5 C6 C1 -0.1(5) . . . . ?
C4 C5 C6 C13 178.4(3) . . . . ?
C2 C1 C6 C5 5.3(5) . . . . ?
N1 C1 C6 C5 -175.3(3) . . . . ?
C2 C1 C6 C13 -173.0(3) . . . . ?
N1 C1 C6 C13 6.4(5) . . . . ?
C3 C2 C7 C8 113.2(3) . . . . ?
C1 C2 C7 C8 -63.0(4) . . . . ?
C3 C2 C7 C12 -58.4(4) . . . . ?
C1 C2 C7 C12 125.3(4) . . . . ?
C12 C7 C8 C9 -2.7(5) . . . . ?
C2 C7 C8 C9 -174.5(3) . . . . ?
C12 C7 C8 C19 174.5(3) . . . . ?
C2 C7 C8 C19 2.7(5) . . . . ?
C7 C8 C9 C10 2.2(5) . . . . ?
C19 C8 C9 C10 -175.2(3) . . . . ?
C8 C9 C10 C11 -0.3(5) . . . . ?
C8 C9 C10 C20 178.1(3) . . . . ?
C9 C10 C11 C12 -1.0(5) . . . . ?
C20 C10 C11 C12 -179.5(3) . . . . ?
C10 C11 C12 C7 0.5(5) . . . . ?
C10 C11 C12 C21 179.5(3) . . . . ?
C8 C7 C12 C11 1.4(5) . . . . ?
C2 C7 C12 C11 173.2(3) . . . . ?
C8 C7 C12 C21 -177.6(3) . . . . ?
C2 C7 C12 C21 -5.8(5) . . . . ?
C5 C6 C13 C18 99.6(4) . . . . ?
C1 C6 C13 C18 -82.0(4) . . . . ?
C5 C6 C13 C14 -73.2(4) . . . . ?
C1 C6 C13 C14 105.1(4) . . . . ?
C18 C13 C14 C15 4.2(5) . . . . ?
C6 C13 C14 C15 177.1(3) . . . . ?
C18 C13 C14 C22 -173.5(3) . . . . ?
C6 C13 C14 C22 -0.5(5) . . . . ?
C13 C14 C15 C16 -1.9(5) . . . . ?
C22 C14 C15 C16 175.8(3) . . . . ?
C14 C15 C16 C17 -1.5(5) . . . . ?
C14 C15 C16 C23 178.2(3) . . . . ?
C15 C16 C17 C18 2.8(5) . . . . ?
C23 C16 C17 C18 -177.0(3) . . . . ?
C16 C17 C18 C13 -0.6(5) . . . . ?
C16 C17 C18 C24 -179.9(3) . . . . ?
C14 C13 C18 C17 -3.0(5) . . . . ?
C6 C13 C18 C17 -175.8(3) . . . . ?
C14 C13 C18 C24 176.4(3) . . . . ?
C6 C13 C18 C24 3.5(5) . . . . ?
C53 Si2 N2 C28 -101.0(3) . . . . ?
C54A Si2 N2 C28 136.5(11) . . . . ?
C54B Si2 N2 C28 26.4(13) . . . . ?
Cl4A Si2 N2 C28 23.1(3) . . . . ?
Cl4B Si2 N2 C28 136.3(4) . . . . ?
C53 Si2 N2 Sb2 76.4(2) . . . . ?
C54A Si2 N2 Sb2 -46.1(11) . . . . ?
C54B Si2 N2 Sb2 -156.2(13) . . . . ?
Cl4A Si2 N2 Sb2 -159.5(2) . . . . ?
Cl4B Si2 N2 Sb2 -46.3(4) . . . . ?
C52A Sb2 N2 C28 -125.5(3) . . . . ?
C52B Sb2 N2 C28 136(5) . . . . ?
Cl3B Sb2 N2 C28 -128.2(13) . . . . ?
Cl3A Sb2 N2 C28 141.1(2) . . . . ?
C52A Sb2 N2 Si2 56.8(3) . . . . ?
C52B Sb2 N2 Si2 -41(5) . . . . ?
Cl3B Sb2 N2 Si2 54.1(13) . . . . ?
Cl3A Sb2 N2 Si2 -36.60(17) . . . . ?
Si2 N2 C28 C33 56.3(4) . . . . ?
Sb2 N2 C28 C33 -121.4(3) . . . . ?
Si2 N2 C28 C29 -124.7(3) . . . . ?
Sb2 N2 C28 C29 57.6(3) . . . . ?
C33 C28 C29 C30 -3.8(5) . . . . ?
N2 C28 C29 C30 177.1(3) . . . . ?
C33 C28 C29 C34 173.7(3) . . . . ?
N2 C28 C29 C34 -5.3(5) . . . . ?
C28 C29 C30 C31 0.5(6) . . . . ?
C34 C29 C30 C31 -177.2(3) . . . . ?
C29 C30 C31 C32 2.5(6) . . . . ?
C30 C31 C32 C33 -2.2(6) . . . . ?
C31 C32 C33 C28 -1.2(6) . . . . ?
C31 C32 C33 C40 175.4(3) . . . . ?
C29 C28 C33 C32 4.2(5) . . . . ?
N2 C28 C33 C32 -176.8(3) . . . . ?
C29 C28 C33 C40 -172.2(3) . . . . ?
N2 C28 C33 C40 6.8(5) . . . . ?
C30 C29 C34 C39 71.6(4) . . . . ?
C28 C29 C34 C39 -106.0(4) . . . . ?
C30 C29 C34 C35 -101.7(4) . . . . ?
C28 C29 C34 C35 80.7(4) . . . . ?
C39 C34 C35 C36 2.3(5) . . . . ?
C29 C34 C35 C36 175.6(3) . . . . ?
C39 C34 C35 C46 -177.1(3) . . . . ?
C29 C34 C35 C46 -3.8(5) . . . . ?
C34 C35 C36 C37 -0.4(5) . . . . ?
C46 C35 C36 C37 179.0(3) . . . . ?
C35 C36 C37 C38 -0.2(5) . . . . ?
C35 C36 C37 C47 -179.2(3) . . . . ?
C36 C37 C38 C39 -1.2(5) . . . . ?
C47 C37 C38 C39 177.8(3) . . . . ?
C37 C38 C39 C34 3.1(5) . . . . ?
C37 C38 C39 C48 -175.6(3) . . . . ?
C35 C34 C39 C38 -3.7(5) . . . . ?
C29 C34 C39 C38 -177.1(3) . . . . ?
C35 C34 C39 C48 175.0(3) . . . . ?
C29 C34 C39 C48 1.5(5) . . . . ?
C32 C33 C40 C41 63.1(4) . . . . ?
C28 C33 C40 C41 -120.4(4) . . . . ?
C32 C33 C40 C45 -109.9(4) . . . . ?
C28 C33 C40 C45 66.5(4) . . . . ?
C45 C40 C41 C42 -5.9(5) . . . . ?
C33 C40 C41 C42 -178.9(3) . . . . ?
C45 C40 C41 C49 173.5(3) . . . . ?
C33 C40 C41 C49 0.5(5) . . . . ?
C40 C41 C42 C43 2.6(5) . . . . ?
C49 C41 C42 C43 -176.8(3) . . . . ?
C41 C42 C43 C44 1.4(5) . . . . ?
C41 C42 C43 C50 -179.3(4) . . . . ?
C42 C43 C44 C45 -2.2(5) . . . . ?
C50 C43 C44 C45 178.5(3) . . . . ?
C43 C44 C45 C40 -1.0(5) . . . . ?
C43 C44 C45 C51 177.1(3) . . . . ?
C41 C40 C45 C44 5.2(5) . . . . ?
C33 C40 C45 C44 178.3(3) . . . . ?
C41 C40 C45 C51 -172.8(3) . . . . ?
C33 C40 C45 C51 0.3(5) . . . . ?
C80 Si3 N3 C55 98.3(3) . . . . ?
C81A Si3 N3 C55 -141.6(11) . . . . ?
C81B Si3 N3 C55 -24.5(11) . . . . ?
Cl6A Si3 N3 C55 -28.3(3) . . . . ?
Cl6B Si3 N3 C55 -139.8(3) . . . . ?
C80 Si3 N3 Sb3 -79.8(2) . . . . ?
C81A Si3 N3 Sb3 40.3(11) . . . . ?
C81B Si3 N3 Sb3 157.4(11) . . . . ?
Cl6A Si3 N3 Sb3 153.6(3) . . . . ?
Cl6B Si3 N3 Sb3 42.1(3) . . . . ?
C79A Sb3 N3 C55 125.2(4) . . . . ?
C79B Sb3 N3 C55 -145(4) . . . . ?
Cl5B Sb3 N3 C55 123.7(17) . . . . ?
Cl5A Sb3 N3 C55 -141.6(2) . . . . ?
C79A Sb3 N3 Si3 -56.5(4) . . . . ?
C79B Sb3 N3 Si3 33(4) . . . . ?
Cl5B Sb3 N3 Si3 -58.0(17) . . . . ?
Cl5A Sb3 N3 Si3 36.76(17) . . . . ?
Si3 N3 C55 C56 127.6(3) . . . . ?
Sb3 N3 C55 C56 -54.1(3) . . . . ?
Si3 N3 C55 C60 -53.6(4) . . . . ?
Sb3 N3 C55 C60 124.7(3) . . . . ?
C60 C55 C56 C57 4.6(5) . . . . ?
N3 C55 C56 C57 -176.6(3) . . . . ?
C60 C55 C56 C61 -174.0(3) . . . . ?
N3 C55 C56 C61 4.8(5) . . . . ?
C55 C56 C57 C58 0.0(5) . . . . ?
C61 C56 C57 C58 178.8(3) . . . . ?
C56 C57 C58 C59 -3.1(5) . . . . ?
C57 C58 C59 C60 1.5(6) . . . . ?
C58 C59 C60 C55 3.1(5) . . . . ?
C58 C59 C60 C67 -174.3(3) . . . . ?
C56 C55 C60 C59 -6.1(5) . . . . ?
N3 C55 C60 C59 175.1(3) . . . . ?
C56 C55 C60 C67 171.1(3) . . . . ?
N3 C55 C60 C67 -7.8(5) . . . . ?
C57 C56 C61 C66 -71.4(4) . . . . ?
C55 C56 C61 C66 107.3(4) . . . . ?
C57 C56 C61 C62 101.3(4) . . . . ?
C55 C56 C61 C62 -80.0(4) . . . . ?
C66 C61 C62 C63 -2.3(5) . . . . ?
C56 C61 C62 C63 -174.9(3) . . . . ?
C66 C61 C62 C73 177.0(3) . . . . ?
C56 C61 C62 C73 4.3(5) . . . . ?
C61 C62 C63 C64 -0.8(5) . . . . ?
C73 C62 C63 C64 179.9(4) . . . . ?
C62 C63 C64 C65 2.4(5) . . . . ?
C62 C63 C64 C74 -177.3(3) . . . . ?
C63 C64 C65 C66 -0.9(5) . . . . ?
C74 C64 C65 C66 178.8(3) . . . . ?
C62 C61 C66 C65 3.7(5) . . . . ?
C56 C61 C66 C65 176.5(3) . . . . ?
C62 C61 C66 C75 -175.1(3) . . . . ?
C56 C61 C66 C75 -2.3(5) . . . . ?
C64 C65 C66 C61 -2.1(5) . . . . ?
C64 C65 C66 C75 176.7(3) . . . . ?
C59 C60 C67 C72 -57.3(4) . . . . ?
C55 C60 C67 C72 125.5(4) . . . . ?
C59 C60 C67 C68 111.8(4) . . . . ?
C55 C60 C67 C68 -65.4(5) . . . . ?
C72 C67 C68 C69 -2.1(5) . . . . ?
C60 C67 C68 C69 -171.2(3) . . . . ?
C72 C67 C68 C76 175.0(3) . . . . ?
C60 C67 C68 C76 5.8(5) . . . . ?
C67 C68 C69 C70 1.0(6) . . . . ?
C76 C68 C69 C70 -176.2(3) . . . . ?
C68 C69 C70 C71 0.1(6) . . . . ?
C68 C69 C70 C77 178.5(4) . . . . ?
C69 C70 C71 C72 0.0(6) . . . . ?
C77 C70 C71 C72 -178.5(4) . . . . ?
C68 C67 C72 C71 2.1(5) . . . . ?
C60 C67 C72 C71 171.3(3) . . . . ?
C68 C67 C72 C78 -177.8(3) . . . . ?
C60 C67 C72 C78 -8.6(5) . . . . ?
C70 C71 C72 C67 -1.0(6) . . . . ?
C70 C71 C72 C78 178.9(3) . . . . ?
C138 Si4 N4 C82 29.8(19) . . . . ?
C107 Si4 N4 C82 141.3(8) . . . . ?
C108 Si4 N4 C82 -96.7(3) . . . . ?
Cl8B Si4 N4 C82 138.2(8) . . . . ?
Cl8A Si4 N4 C82 24.7(3) . . . . ?
C138 Si4 N4 Sb4 -153.1(19) . . . . ?
C107 Si4 N4 Sb4 -41.6(8) . . . . ?
C108 Si4 N4 Sb4 80.4(2) . . . . ?
Cl8B Si4 N4 Sb4 -44.7(8) . . . . ?
Cl8A Si4 N4 Sb4 -158.16(14) . . . . ?
C106 Sb4 N4 C82 -125.9(3) . . . . ?
C137 Sb4 N4 C82 140(5) . . . . ?
Cl7B Sb4 N4 C82 -130.4(13) . . . . ?
Cl7A Sb4 N4 C82 141.04(19) . . . . ?
C106 Sb4 N4 Si4 56.7(2) . . . . ?
C137 Sb4 N4 Si4 -37(5) . . . . ?
Cl7B Sb4 N4 Si4 52.2(13) . . . . ?
Cl7A Sb4 N4 Si4 -36.42(16) . . . . ?
Si4 N4 C82 C83 -125.0(3) . . . . ?
Sb4 N4 C82 C83 57.5(3) . . . . ?
Si4 N4 C82 C87 55.3(4) . . . . ?
Sb4 N4 C82 C87 -122.1(3) . . . . ?
C87 C82 C83 C84 -2.2(5) . . . . ?
N4 C82 C83 C84 178.2(3) . . . . ?
C87 C82 C83 C88 176.4(3) . . . . ?
N4 C82 C83 C88 -3.3(5) . . . . ?
C82 C83 C84 C85 -0.1(5) . . . . ?
C88 C83 C84 C85 -178.8(3) . . . . ?
C83 C84 C85 C86 1.5(6) . . . . ?
C84 C85 C86 C87 -0.7(6) . . . . ?
C85 C86 C87 C82 -1.6(5) . . . . ?
C85 C86 C87 C94 176.1(3) . . . . ?
C83 C82 C87 C86 3.0(5) . . . . ?
N4 C82 C87 C86 -177.3(3) . . . . ?
C83 C82 C87 C94 -174.5(3) . . . . ?
N4 C82 C87 C94 5.2(5) . . . . ?
C84 C83 C88 C93 70.9(4) . . . . ?
C82 C83 C88 C93 -107.7(4) . . . . ?
C84 C83 C88 C89 -102.1(4) . . . . ?
C82 C83 C88 C89 79.3(4) . . . . ?
C93 C88 C89 C90 3.3(5) . . . . ?
C83 C88 C89 C90 176.3(3) . . . . ?
C93 C88 C89 C100 -175.4(3) . . . . ?
C83 C88 C89 C100 -2.4(5) . . . . ?
C88 C89 C90 C91 -1.0(5) . . . . ?
C100 C89 C90 C91 177.7(3) . . . . ?
C89 C90 C91 C92 0.0(5) . . . . ?
C89 C90 C91 C101 -178.6(3) . . . . ?
C90 C91 C92 C93 -1.5(5) . . . . ?
C101 C91 C92 C93 177.2(3) . . . . ?
C91 C92 C93 C88 3.9(5) . . . . ?
C91 C92 C93 C102 -175.5(3) . . . . ?
C89 C88 C93 C92 -4.7(5) . . . . ?
C83 C88 C93 C92 -177.7(3) . . . . ?
C89 C88 C93 C102 174.6(3) . . . . ?
C83 C88 C93 C102 1.5(5) . . . . ?
C86 C87 C94 C95 -109.4(4) . . . . ?
C82 C87 C94 C95 68.1(4) . . . . ?
C86 C87 C94 C99 62.6(4) . . . . ?
C82 C87 C94 C99 -119.9(4) . . . . ?
C99 C94 C95 C96 2.0(5) . . . . ?
C87 C94 C95 C96 174.0(3) . . . . ?
C99 C94 C95 C103 -175.9(3) . . . . ?
C87 C94 C95 C103 -3.8(5) . . . . ?
C94 C95 C96 C97 -0.6(5) . . . . ?
C103 C95 C96 C97 177.3(3) . . . . ?
C95 C96 C97 C98 0.0(5) . . . . ?
C95 C96 C97 C104 -177.4(3) . . . . ?
C96 C97 C98 C99 -0.7(5) . . . . ?
C104 C97 C98 C99 176.7(3) . . . . ?
C97 C98 C99 C94 2.0(5) . . . . ?
C97 C98 C99 C105 -175.4(3) . . . . ?
C95 C94 C99 C98 -2.6(5) . . . . ?
C87 C94 C99 C98 -174.8(3) . . . . ?
C95 C94 C99 C105 174.7(3) . . . . ?
C87 C94 C99 C105 2.6(5) . . . . ?
C115 C110 C111 C112 0.0 . . . . ?
C109 C110 C111 C112 178.1(6) . . . . ?
C110 C111 C112 C113 0.0 . . . . ?
C111 C112 C113 C114 0.0 . . . . ?
C112 C113 C114 C115 0.0 . . . . ?
C113 C114 C115 C110 0.0 . . . . ?
C111 C110 C115 C114 0.0 . . . . ?
C109 C110 C115 C114 -177.8(7) . . . . ?
C118 C117 C122 C121 0.0 . . . . ?
C116 C117 C122 C121 -175.8(18) . . . . ?
C117 C122 C121 C120 0.0 . . . . ?
C122 C121 C120 C119 0.0 . . . . ?
C121 C120 C119 C118 0.0 . . . . ?
C120 C119 C118 C117 0.0 . . . . ?
C122 C117 C118 C119 0.0 . . . . ?
C116 C117 C118 C119 176.2(17) . . . . ?
C129 C124 C125 C126 0.0 . . . . ?
C123 C124 C125 C126 178(2) . . . . ?
C124 C125 C126 C127 0.0 . . . . ?
C125 C126 C127 C128 0.0 . . . . ?
C126 C127 C128 C129 0.0 . . . . ?
C127 C128 C129 C124 0.0 . . . . ?
C125 C124 C129 C128 0.0 . . . . ?
C123 C124 C129 C128 -177(2) . . . . ?
C136 C131 C132 C133 0.0 . . . . ?
C130 C131 C132 C133 -176(4) . . . . ?
C131 C132 C133 C134 0.0 . . . . ?
C132 C133 C134 C135 0.0 . . . . ?
C133 C134 C135 C136 0.0 . . . . ?
C134 C135 C136 C131 0.0 . . . . ?
C132 C131 C136 C135 0.0 . . . . ?
C130 C131 C136 C135 176(4) . . . . ?
C144 C139 C140 C141 0.0 . . . . ?
C139 C140 C141 C142 0.0 . . . . ?
C140 C141 C142 C143 0.0 . . . . ?
C141 C142 C143 C144 0.0 . . . . ?
C141 C142 C143 C145 172(2) . . . . ?
C142 C143 C144 C139 0.0 . . . . ?
C145 C143 C144 C139 -172(2) . . . . ?
C140 C139 C144 C143 0.0 . . . . ?
 
_diffrn_measured_fraction_theta_max    0.982
_diffrn_reflns_theta_full              29.00
_diffrn_measured_fraction_theta_full   0.982
_refine_diff_density_max    0.600
_refine_diff_density_min   -0.495
_refine_diff_density_rms    0.102

#=============================================================================

data_is_ch11b
 
_audit_author_name                'Villinger, A.' 
_audit_creation_method            SHELXL-97 

#==============================================================================

# CHEMICAL DATA

_chemical_name_systematic
;
 ?
;
_chemical_name_common             ?
_chemical_melting_point           ?
_chemical_formula_moiety          'C27 H34 Cl2 N Sb Si , 0.5(C6 H6)'
_chemical_formula_sum
 'C30 H37 Cl2 N Sb Si'
_chemical_formula_weight          632.35
 
loop_
 _atom_type_symbol
 _atom_type_description
 _atom_type_scat_dispersion_real
 _atom_type_scat_dispersion_imag
 _atom_type_scat_source
 'C'  'C'   0.0033   0.0016
 'International Tables Vol C Tables 4.2.6.8 and 6.1.1.4'
 'H'  'H'   0.0000   0.0000
 'International Tables Vol C Tables 4.2.6.8 and 6.1.1.4'
 'N'  'N'   0.0061   0.0033
 'International Tables Vol C Tables 4.2.6.8 and 6.1.1.4'
 'Si'  'Si'   0.0817   0.0704
 'International Tables Vol C Tables 4.2.6.8 and 6.1.1.4'
 'Cl'  'Cl'   0.1484   0.1585
 'International Tables Vol C Tables 4.2.6.8 and 6.1.1.4'
 'Sb'  'Sb'  -0.5866   1.5461
 'International Tables Vol C Tables 4.2.6.8 and 6.1.1.4'
 
#==============================================================================

# CRYSTAL DATA
 
_symmetry_cell_setting            triclinic
_symmetry_space_group_name_H-M    'P -1'
_symmetry_space_group_name_Hall   '-P 1'
_symmetry_Int_Tables_number       2
 
loop_
 _symmetry_equiv_pos_as_xyz
 'x, y, z'
 '-x, -y, -z'
 
_cell_length_a                    16.8761(6)
_cell_length_b                    19.0256(6)
_cell_length_c                    19.5410(6)
_cell_angle_alpha                 90.728(2)
_cell_angle_beta                  103.704(2)
_cell_angle_gamma                 97.391(2)
_cell_volume                      6038.9(3)
_cell_formula_units_Z             8
_cell_measurement_temperature     173(2)
_cell_measurement_reflns_used     9861
_cell_measurement_theta_min       4.322 
_cell_measurement_theta_max       46.456
 
_exptl_crystal_description        block
_exptl_crystal_colour             colourless
_exptl_crystal_size_max           0.42
_exptl_crystal_size_mid           0.24
_exptl_crystal_size_min           0.04
_exptl_crystal_density_meas       ?
_exptl_crystal_density_diffrn     1.391
_exptl_crystal_density_method     'not measured'
_exptl_crystal_F_000              2584
_exptl_absorpt_coefficient_mu     1.149
_exptl_absorpt_correction_type    multi-scan
_exptl_absorpt_correction_T_min   0.6440
_exptl_absorpt_correction_T_max   0.9555
_exptl_absorpt_process_details    '(SADABS; Sheldrick, 2004)'

#==============================================================================

# EXPERIMENTAL DATA
 
_exptl_special_details
;
 ?
;
 
_diffrn_ambient_temperature       173(2)
_diffrn_radiation_wavelength      0.71073
_diffrn_radiation_type            MoK\a
_diffrn_radiation_source          'sealed tube'
_diffrn_radiation_monochromator   graphite
_diffrn_measurement_device_type   'Bruker Apex Kappa II-CCD-diffractometer'
_diffrn_measurement_method        'phi and psi scans'
_diffrn_detector_area_resol_mean  ?
_diffrn_standards_number          ?
_diffrn_standards_interval_count  ?
_diffrn_standards_interval_time   ?
_diffrn_standards_decay_%         ?
_diffrn_reflns_number             137362
_diffrn_reflns_av_R_equivalents   0.0954
_diffrn_reflns_av_sigmaI/netI     0.1075
_diffrn_reflns_limit_h_min        -22
_diffrn_reflns_limit_h_max        22
_diffrn_reflns_limit_k_min        -25
_diffrn_reflns_limit_k_max        25
_diffrn_reflns_limit_l_min        -25
_diffrn_reflns_limit_l_max        25
_diffrn_reflns_theta_min          1.76
_diffrn_reflns_theta_max          28.00
_reflns_number_total              28661
_reflns_number_gt                 14754
_reflns_threshold_expression      >2\s(I)
 
_computing_data_collection        'Bruker Apex v2.0-2'
_computing_cell_refinement        'Bruker Apex v2.0-2'
_computing_data_reduction         'Bruker SAINT'
_computing_structure_solution     'SHELXS-97 (Sheldrick, 1997)'
_computing_structure_refinement   'SHELXL-97 (Sheldrick, 1997)'
_computing_molecular_graphics     'ORTEP-3 (Farrugia, 1997)' 
_computing_publication_material   'SHELXL-97'

#==============================================================================

# REFINEMENT DATA 

_refine_special_details
;
 All H atoms  were positioned geometrically and refined using a 
 riding model , with C---H = 0.98 (methyl groups), 0.99\%A (methylene groups), 
 1.00\%A (methine groups) or 0.95 \%A (aryl CH) and with <i>U</i>~iso~(H) = 
 1.5 times <i>U</i>~eq~(C) (methyl groups) or with <i>U</i>~iso~(H) = 1.2 times 
 <i>U</i>~eq~(C) (methylene  groups, aryl CH, methine groups). Torsion angles 
 of all methyl groups were allowed to refine (except the minor part of 
 disordered Si-Me groups which were refined as idealized, staggered 
 methyl groups). All Si---C and Si---Cl distances of disordered 
 groups were restrained to be equal for both parts (esd 0.04) but refined 
 freely. The Uij of disordered Me/Cl pairs were restrained to be equal but 
 refined freely.
 
 Refinement of F^2^ against ALL reflections.  The weighted R-factor wR and
 goodness of fit S are based on F^2^, conventional R-factors R are based
 on F, with F set to zero for negative F^2^. The threshold expression of
 F^2^ > 2\s(F^2^) is used only for calculating R-factors(gt) etc. and is
 not relevant to the choice of reflections for refinement.  R-factors based
 on F^2^ are statistically about twice as large as those based on F, and R-
 factors based on ALL data will be even larger.
;
 
_refine_ls_structure_factor_coef  Fsqd
_refine_ls_matrix_type            full
_refine_ls_weighting_scheme       calc
_refine_ls_weighting_details
 'calc w=1/[\s^2^(Fo^2^)+(0.0342P)^2^+6.8072P] where P=(Fo^2^+2Fc^2^)/3'
_atom_sites_solution_primary      direct
_atom_sites_solution_secondary    difmap
_atom_sites_solution_hydrogens    geom
_refine_ls_hydrogen_treatment     constr
_refine_ls_extinction_method      none
_refine_ls_extinction_coef        ?
_refine_ls_number_reflns          28661
_refine_ls_number_parameters      1323
_refine_ls_number_restraints      17
_refine_ls_R_factor_all           0.1334
_refine_ls_R_factor_gt            0.0443
_refine_ls_wR_factor_ref          0.1125
_refine_ls_wR_factor_gt           0.0802
_refine_ls_goodness_of_fit_ref    1.013
_refine_ls_restrained_S_all       1.013
_refine_ls_shift/su_max           0.002
_refine_ls_shift/su_mean          0.000

#==============================================================================

# ATOMIC COORDINATES AND DISPLACEMENT PARAMETERS
 
loop_
 _atom_site_label
 _atom_site_type_symbol
 _atom_site_fract_x
 _atom_site_fract_y
 _atom_site_fract_z
 _atom_site_U_iso_or_equiv
 _atom_site_adp_type
 _atom_site_occupancy
 _atom_site_symmetry_multiplicity
 _atom_site_calc_flag
 _atom_site_refinement_flags
 _atom_site_disorder_assembly
 _atom_site_disorder_group
Sb1 Sb 0.64288(2) 0.713410(17) 0.763676(17) 0.02901(9) Uani 1 1 d . . .
Cl1 Cl 0.72367(9) 0.70765(8) 0.88174(7) 0.0444(4) Uani 1 1 d . . .
Cl2A Cl 0.8825(6) 0.6800(5) 0.6595(4) 0.0506(10) Uani 0.553(6) 1 d PD A 1
C26A C 0.859(3) 0.7920(10) 0.765(3) 0.0637(14) Uani 0.553(6) 1 d PD A 1
H26A H 0.8371 0.8189 0.7235 0.096 Uiso 0.553(6) 1 calc PR A 1
H26B H 0.9190 0.8039 0.7788 0.096 Uiso 0.553(6) 1 calc PR A 1
H26C H 0.8352 0.8040 0.8035 0.096 Uiso 0.553(6) 1 calc PR A 1
Cl2B Cl 0.8656(8) 0.8018(3) 0.7650(8) 0.0637(14) Uani 0.447(6) 1 d PD A 2
C26B C 0.877(3) 0.685(3) 0.666(2) 0.0506(10) Uani 0.447(6) 1 d PD A 2
H26D H 0.8484 0.7098 0.6256 0.076 Uiso 0.447(6) 1 calc PR A 2
H26E H 0.8709 0.6341 0.6524 0.076 Uiso 0.447(6) 1 calc PR A 2
H26F H 0.9356 0.7039 0.6782 0.076 Uiso 0.447(6) 1 calc PR A 2
Si1 Si 0.83223(9) 0.69656(8) 0.74149(9) 0.0381(4) Uani 1 1 d D . .
N1 N 0.7261(2) 0.67693(19) 0.7138(2) 0.0258(9) Uani 1 1 d . A .
C1 C 0.6852(3) 0.6301(2) 0.6542(3) 0.0275(11) Uani 1 1 d . . .
C2 C 0.7005(3) 0.5594(2) 0.6483(3) 0.0301(12) Uani 1 1 d . A .
C3 C 0.6609(3) 0.5188(3) 0.5870(3) 0.0394(14) Uani 1 1 d . . .
H3 H 0.6722 0.4716 0.5829 0.047 Uiso 1 1 calc R A .
C4 C 0.6064(4) 0.5440(3) 0.5326(3) 0.0445(14) Uani 1 1 d . A .
H4 H 0.5818 0.5153 0.4910 0.053 Uiso 1 1 calc R . .
C5 C 0.5879(3) 0.6117(3) 0.5395(3) 0.0405(14) Uani 1 1 d . . .
H5 H 0.5485 0.6290 0.5027 0.049 Uiso 1 1 calc R A .
C6 C 0.6250(3) 0.6550(2) 0.5984(3) 0.0295(12) Uani 1 1 d . A .
C7 C 0.5972(3) 0.7265(3) 0.6023(2) 0.0297(12) Uani 1 1 d . . .
C8 C 0.5187(3) 0.7305(3) 0.6137(3) 0.0335(12) Uani 1 1 d . A .
C9 C 0.4908(3) 0.7964(3) 0.6139(3) 0.0372(13) Uani 1 1 d . . .
H9 H 0.4389 0.7992 0.6241 0.045 Uiso 1 1 calc R A .
C10 C 0.5367(3) 0.8575(3) 0.5998(3) 0.0366(13) Uani 1 1 d . A .
C11 C 0.6127(3) 0.8524(3) 0.5860(3) 0.0346(13) Uani 1 1 d . . .
H11 H 0.6447 0.8939 0.5758 0.042 Uiso 1 1 calc R A .
C12 C 0.6433(3) 0.7881(3) 0.5869(3) 0.0315(12) Uani 1 1 d . A .
C13 C 0.7532(3) 0.5240(2) 0.7061(3) 0.0298(12) Uani 1 1 d . . .
C14 C 0.7278(3) 0.5103(2) 0.7690(3) 0.0354(13) Uani 1 1 d . A .
C15 C 0.7763(3) 0.4750(3) 0.8215(3) 0.0377(13) Uani 1 1 d . . .
H15 H 0.7587 0.4658 0.8637 0.045 Uiso 1 1 calc R A .
C16 C 0.8484(3) 0.4529(3) 0.8149(3) 0.0402(14) Uani 1 1 d . A .
C17 C 0.8706(3) 0.4631(3) 0.7517(3) 0.0394(14) Uani 1 1 d . . .
H17 H 0.9192 0.4463 0.7455 0.047 Uiso 1 1 calc R A .
C18 C 0.8241(3) 0.4971(3) 0.6966(3) 0.0341(12) Uani 1 1 d . A .
C19 C 0.4619(3) 0.6656(3) 0.6250(3) 0.0474(15) Uani 1 1 d . . .
H19A H 0.4947 0.6307 0.6500 0.071 Uiso 1 1 calc R A .
H19B H 0.4294 0.6447 0.5792 0.071 Uiso 1 1 calc R . .
H19C H 0.4248 0.6793 0.6530 0.071 Uiso 1 1 calc R . .
C20 C 0.5043(4) 0.9285(3) 0.5979(3) 0.0511(16) Uani 1 1 d . . .
H20A H 0.4595 0.9257 0.6222 0.077 Uiso 1 1 calc R A .
H20B H 0.4836 0.9403 0.5488 0.077 Uiso 1 1 calc R . .
H20C H 0.5488 0.9654 0.6214 0.077 Uiso 1 1 calc R . .
C21 C 0.7252(3) 0.7861(3) 0.5699(3) 0.0472(15) Uani 1 1 d . . .
H21A H 0.7672 0.7826 0.6135 0.071 Uiso 1 1 calc R A .
H21B H 0.7401 0.8296 0.5468 0.071 Uiso 1 1 calc R . .
H21C H 0.7219 0.7449 0.5382 0.071 Uiso 1 1 calc R . .
C22 C 0.6487(3) 0.5292(3) 0.7812(3) 0.0398(14) Uani 1 1 d . . .
H22A H 0.6146 0.5431 0.7368 0.060 Uiso 1 1 calc R A .
H22B H 0.6604 0.5687 0.8163 0.060 Uiso 1 1 calc R . .
H22C H 0.6191 0.4880 0.7984 0.060 Uiso 1 1 calc R . .
C23 C 0.9011(4) 0.4172(3) 0.8743(3) 0.0550(17) Uani 1 1 d . . .
H23A H 0.9524 0.4094 0.8619 0.083 Uiso 1 1 calc R A .
H23B H 0.8712 0.3716 0.8821 0.083 Uiso 1 1 calc R . .
H23C H 0.9140 0.4476 0.9175 0.083 Uiso 1 1 calc R . .
C24 C 0.8517(4) 0.5021(3) 0.6286(3) 0.0463(15) Uani 1 1 d . . .
H24A H 0.9118 0.5135 0.6392 0.069 Uiso 1 1 calc R A .
H24B H 0.8265 0.5395 0.6008 0.069 Uiso 1 1 calc R . .
H24C H 0.8348 0.4567 0.6017 0.069 Uiso 1 1 calc R . .
C25 C 0.6724(3) 0.8263(2) 0.7682(3) 0.0355(13) Uani 1 1 d . . .
H25A H 0.6446 0.8472 0.8006 0.053 Uiso 1 1 calc R . .
H25B H 0.6541 0.8442 0.7211 0.053 Uiso 1 1 calc R . .
H25C H 0.7321 0.8392 0.7851 0.053 Uiso 1 1 calc R . .
C27 C 0.8848(3) 0.6501(3) 0.8183(3) 0.0397(14) Uani 1 1 d D A .
H27A H 0.8844 0.6004 0.8045 0.060 Uiso 1 1 calc R . .
H27B H 0.8561 0.6525 0.8562 0.060 Uiso 1 1 calc R . .
H27C H 0.9418 0.6729 0.8350 0.060 Uiso 1 1 calc R . .
Sb2 Sb 0.33685(2) 0.671033(18) 0.952108(17) 0.02923(9) Uani 1 1 d . . .
Cl3 Cl 0.25649(9) 0.66302(7) 1.03895(7) 0.0419(3) Uani 1 1 d . . .
Cl4A Cl 0.1242(6) 0.7178(3) 0.8648(5) 0.0530(12) Uani 0.539(6) 1 d PD B 1
C54A C 0.097(3) 0.587(2) 0.7615(11) 0.0510(12) Uani 0.539(6) 1 d PD B 1
H54A H 0.1405 0.5774 0.7382 0.076 Uiso 0.539(6) 1 calc PR B 1
H54B H 0.0686 0.6249 0.7376 0.076 Uiso 0.539(6) 1 calc PR B 1
H54C H 0.0581 0.5440 0.7593 0.076 Uiso 0.539(6) 1 calc PR B 1
Cl4B Cl 0.0926(7) 0.5895(6) 0.7513(3) 0.0510(12) Uani 0.461(6) 1 d PD B 2
C54B C 0.128(3) 0.7088(12) 0.857(2) 0.0530(12) Uani 0.461(6) 1 d PD B 2
H54D H 0.1583 0.7357 0.8270 0.080 Uiso 0.461(6) 1 calc PR B 2
H54E H 0.1468 0.7285 0.9057 0.080 Uiso 0.461(6) 1 calc PR B 2
H54F H 0.0688 0.7121 0.8400 0.080 Uiso 0.461(6) 1 calc PR B 2
Si2 Si 0.14423(9) 0.61540(8) 0.85449(8) 0.0351(4) Uani 1 1 d D . .
N2 N 0.2495(2) 0.61303(19) 0.8721(2) 0.0262(9) Uani 1 1 d . B .
C28 C 0.2876(3) 0.5680(3) 0.8322(3) 0.0292(12) Uani 1 1 d . . .
C29 C 0.2623(3) 0.4938(3) 0.8232(3) 0.0292(11) Uani 1 1 d . B .
C30 C 0.2978(3) 0.4554(3) 0.7798(3) 0.0379(13) Uani 1 1 d . . .
H30 H 0.2800 0.4059 0.7721 0.045 Uiso 1 1 calc R B .
C31 C 0.3568(4) 0.4857(3) 0.7480(3) 0.0424(14) Uani 1 1 d . B .
H31 H 0.3779 0.4582 0.7173 0.051 Uiso 1 1 calc R . .
C32 C 0.3849(3) 0.5563(3) 0.7614(3) 0.0361(13) Uani 1 1 d . . .
H32 H 0.4280 0.5772 0.7414 0.043 Uiso 1 1 calc R B .
C33 C 0.3520(3) 0.5983(3) 0.8034(3) 0.0298(12) Uani 1 1 d . B .
C34 C 0.2045(3) 0.4500(2) 0.8590(3) 0.0308(12) Uani 1 1 d . . .
C35 C 0.2259(3) 0.4430(3) 0.9327(3) 0.0357(13) Uani 1 1 d . B .
C36 C 0.1763(4) 0.3955(3) 0.9624(3) 0.0456(15) Uani 1 1 d . . .
H36 H 0.1900 0.3916 1.0121 0.055 Uiso 1 1 calc R B .
C37 C 0.1071(4) 0.3533(3) 0.9227(4) 0.0508(16) Uani 1 1 d . B .
C38 C 0.0884(4) 0.3601(3) 0.8511(3) 0.0479(15) Uani 1 1 d . . .
H38 H 0.0413 0.3316 0.8231 0.057 Uiso 1 1 calc R B .
C39 C 0.1358(3) 0.4071(3) 0.8180(3) 0.0365(13) Uani 1 1 d . B .
C40 C 0.3894(3) 0.6746(3) 0.8148(3) 0.0300(12) Uani 1 1 d . . .
C41 C 0.3509(3) 0.7281(3) 0.7756(3) 0.0336(12) Uani 1 1 d . B .
C42 C 0.3907(3) 0.7963(3) 0.7838(3) 0.0393(14) Uani 1 1 d . . .
H42 H 0.3651 0.8319 0.7565 0.047 Uiso 1 1 calc R B .
C43 C 0.4660(3) 0.8155(3) 0.8299(3) 0.0373(13) Uani 1 1 d . B .
C44 C 0.5045(3) 0.7630(3) 0.8670(3) 0.0345(12) Uani 1 1 d . . .
H44 H 0.5569 0.7754 0.8987 0.041 Uiso 1 1 calc R B .
C45 C 0.4687(3) 0.6921(3) 0.8592(3) 0.0309(12) Uani 1 1 d . B .
C46 C 0.3020(3) 0.4831(3) 0.9793(3) 0.0417(14) Uani 1 1 d . . .
H46A H 0.3426 0.4963 0.9516 0.063 Uiso 1 1 calc R B .
H46B H 0.3250 0.4532 1.0175 0.063 Uiso 1 1 calc R . .
H46C H 0.2882 0.5261 0.9995 0.063 Uiso 1 1 calc R . .
C47 C 0.0554(4) 0.2997(4) 0.9573(4) 0.082(2) Uani 1 1 d . . .
H47A H 0.0916 0.2717 0.9893 0.124 Uiso 1 1 calc R B .
H47B H 0.0169 0.2682 0.9209 0.124 Uiso 1 1 calc R . .
H47C H 0.0245 0.3249 0.9840 0.124 Uiso 1 1 calc R . .
C48 C 0.1095(4) 0.4078(3) 0.7384(3) 0.0483(15) Uani 1 1 d . . .
H48A H 0.0494 0.4036 0.7235 0.072 Uiso 1 1 calc R B .
H48B H 0.1285 0.3679 0.7176 0.072 Uiso 1 1 calc R . .
H48C H 0.1337 0.4525 0.7226 0.072 Uiso 1 1 calc R . .
C49 C 0.2685(3) 0.7104(3) 0.7246(3) 0.0466(15) Uani 1 1 d . . .
H49A H 0.2661 0.6648 0.6998 0.070 Uiso 1 1 calc R B .
H49B H 0.2606 0.7476 0.6903 0.070 Uiso 1 1 calc R . .
H49C H 0.2250 0.7074 0.7504 0.070 Uiso 1 1 calc R . .
C50 C 0.5048(4) 0.8923(3) 0.8397(3) 0.0472(15) Uani 1 1 d . . .
H50A H 0.5091 0.9106 0.7939 0.071 Uiso 1 1 calc R B .
H50B H 0.5599 0.8958 0.8713 0.071 Uiso 1 1 calc R . .
H50C H 0.4706 0.9202 0.8603 0.071 Uiso 1 1 calc R . .
C51 C 0.5163(3) 0.6362(3) 0.8977(3) 0.0363(13) Uani 1 1 d . . .
H51A H 0.5612 0.6591 0.9359 0.054 Uiso 1 1 calc R B .
H51B H 0.5391 0.6106 0.8647 0.054 Uiso 1 1 calc R . .
H51C H 0.4793 0.6027 0.9174 0.054 Uiso 1 1 calc R . .
C52 C 0.3198(3) 0.7805(2) 0.9360(3) 0.0373(13) Uani 1 1 d . . .
H52A H 0.3727 0.8108 0.9524 0.056 Uiso 1 1 calc R . .
H52B H 0.2810 0.7937 0.9626 0.056 Uiso 1 1 calc R . .
H52C H 0.2978 0.7869 0.8857 0.056 Uiso 1 1 calc R . .
C53 C 0.0868(3) 0.5646(3) 0.9110(3) 0.0453(15) Uani 1 1 d D B .
H53A H 0.1125 0.5782 0.9606 0.068 Uiso 1 1 calc R . .
H53B H 0.0875 0.5137 0.9029 0.068 Uiso 1 1 calc R . .
H53C H 0.0297 0.5746 0.8995 0.068 Uiso 1 1 calc R . .
Sb3 Sb 0.66827(2) 0.206921(17) 0.544212(17) 0.02779(9) Uani 1 1 d . . .
Cl5 Cl 0.74773(9) 0.21813(7) 0.45661(7) 0.0420(3) Uani 1 1 d . . .
Cl6A Cl 0.9145(4) 0.1826(4) 0.74101(16) 0.0421(7) Uani 0.721(5) 1 d PD C 1
C80A C 0.879(2) 0.2960(8) 0.6308(18) 0.0459(16) Uani 0.721(5) 1 d PD C 1
H80A H 0.8537 0.3191 0.6636 0.069 Uiso 0.721(5) 1 calc PR C 1
H80B H 0.8545 0.3080 0.5825 0.069 Uiso 0.721(5) 1 calc PR C 1
H80C H 0.9384 0.3125 0.6423 0.069 Uiso 0.721(5) 1 calc PR C 1
Cl6B Cl 0.8843(14) 0.3053(6) 0.6352(12) 0.0459(16) Uani 0.279(5) 1 d PD C 2
C80B C 0.908(4) 0.182(4) 0.7313(16) 0.0421(7) Uani 0.279(5) 1 d PD C 2
H80D H 0.8782 0.2023 0.7620 0.063 Uiso 0.279(5) 1 calc PR C 2
H80E H 0.9661 0.2037 0.7439 0.063 Uiso 0.279(5) 1 calc PR C 2
H80F H 0.9056 0.1306 0.7372 0.063 Uiso 0.279(5) 1 calc PR C 2
Si3 Si 0.86183(9) 0.19866(7) 0.63842(8) 0.0301(3) Uani 1 1 d D . .
N3 N 0.7569(2) 0.17017(19) 0.62223(19) 0.0224(9) Uani 1 1 d . C .
C55 C 0.7210(3) 0.1161(2) 0.6608(2) 0.0222(10) Uani 1 1 d . . .
C56 C 0.6580(3) 0.1301(2) 0.6928(2) 0.0261(11) Uani 1 1 d . C .
C57 C 0.6272(3) 0.0808(3) 0.7347(3) 0.0336(12) Uani 1 1 d . . .
H57 H 0.5850 0.0915 0.7563 0.040 Uiso 1 1 calc R C .
C58 C 0.6565(3) 0.0168(3) 0.7458(3) 0.0353(13) Uani 1 1 d . C .
H58 H 0.6371 -0.0156 0.7767 0.042 Uiso 1 1 calc R . .
C59 C 0.7144(3) 0.0004(3) 0.7112(2) 0.0297(12) Uani 1 1 d . . .
H59 H 0.7329 -0.0447 0.7170 0.036 Uiso 1 1 calc R C .
C60 C 0.7470(3) 0.0481(2) 0.6678(2) 0.0242(11) Uani 1 1 d . C .
C61 C 0.6191(3) 0.1972(2) 0.6834(2) 0.0278(11) Uani 1 1 d . . .
C62 C 0.6573(3) 0.2601(3) 0.7229(2) 0.0306(12) Uani 1 1 d . C .
C63 C 0.6165(3) 0.3200(3) 0.7145(3) 0.0361(13) Uani 1 1 d . . .
H63 H 0.6424 0.3624 0.7410 0.043 Uiso 1 1 calc R C .
C64 C 0.5402(3) 0.3198(3) 0.6693(3) 0.0364(13) Uani 1 1 d . C .
C65 C 0.5022(3) 0.2569(3) 0.6316(3) 0.0330(12) Uani 1 1 d . . .
H65 H 0.4498 0.2559 0.6000 0.040 Uiso 1 1 calc R C .
C66 C 0.5397(3) 0.1951(2) 0.6395(3) 0.0303(12) Uani 1 1 d . C .
C67 C 0.8029(3) 0.0188(2) 0.6285(2) 0.0235(10) Uani 1 1 d . . .
C68 C 0.8739(3) -0.0076(2) 0.6660(3) 0.0281(11) Uani 1 1 d . C .
C69 C 0.9211(3) -0.0403(2) 0.6296(3) 0.0324(12) Uani 1 1 d . . .
H69 H 0.9692 -0.0576 0.6554 0.039 Uiso 1 1 calc R C .
C70 C 0.9001(3) -0.0487(3) 0.5563(3) 0.0346(13) Uani 1 1 d . C .
C71 C 0.8286(3) -0.0243(2) 0.5205(3) 0.0320(12) Uani 1 1 d . . .
H71 H 0.8127 -0.0301 0.4705 0.038 Uiso 1 1 calc R C .
C72 C 0.7792(3) 0.0084(2) 0.5551(2) 0.0240(11) Uani 1 1 d . C .
C73 C 0.7400(3) 0.2635(3) 0.7738(3) 0.0405(14) Uani 1 1 d . . .
H73A H 0.7487 0.2158 0.7896 0.061 Uiso 1 1 calc R C .
H73B H 0.7421 0.2949 0.8145 0.061 Uiso 1 1 calc R . .
H73C H 0.7831 0.2819 0.7503 0.061 Uiso 1 1 calc R . .
C74 C 0.5003(4) 0.3870(3) 0.6594(3) 0.0478(15) Uani 1 1 d . . .
H74A H 0.5005 0.4078 0.7055 0.072 Uiso 1 1 calc R C .
H74B H 0.4435 0.3758 0.6315 0.072 Uiso 1 1 calc R . .
H74C H 0.5312 0.4209 0.6347 0.072 Uiso 1 1 calc R . .
C75 C 0.4915(3) 0.1272(3) 0.6013(3) 0.0367(13) Uani 1 1 d . . .
H75A H 0.4503 0.1390 0.5601 0.055 Uiso 1 1 calc R C .
H75B H 0.4639 0.0999 0.6332 0.055 Uiso 1 1 calc R . .
H75C H 0.5292 0.0989 0.5858 0.055 Uiso 1 1 calc R . .
C76 C 0.9031(3) -0.0015(3) 0.7455(3) 0.0376(13) Uani 1 1 d . . .
H76A H 0.9634 0.0077 0.7590 0.056 Uiso 1 1 calc R C .
H76B H 0.8846 -0.0460 0.7653 0.056 Uiso 1 1 calc R . .
H76C H 0.8803 0.0376 0.7638 0.056 Uiso 1 1 calc R . .
C77 C 0.9510(4) -0.0866(3) 0.5175(3) 0.0533(17) Uani 1 1 d . . .
H77A H 1.0058 -0.0880 0.5483 0.080 Uiso 1 1 calc R C .
H77B H 0.9563 -0.0613 0.4751 0.080 Uiso 1 1 calc R . .
H77C H 0.9239 -0.1352 0.5040 0.080 Uiso 1 1 calc R . .
C78 C 0.7002(3) 0.0283(3) 0.5107(2) 0.0309(12) Uani 1 1 d . . .
H78A H 0.6619 0.0334 0.5405 0.046 Uiso 1 1 calc R C .
H78B H 0.6757 -0.0089 0.4739 0.046 Uiso 1 1 calc R . .
H78C H 0.7117 0.0733 0.4889 0.046 Uiso 1 1 calc R . .
C79 C 0.6863(3) 0.3206(2) 0.5634(3) 0.0350(13) Uani 1 1 d . . .
H79A H 0.6327 0.3380 0.5530 0.053 Uiso 1 1 calc R . .
H79B H 0.7198 0.3430 0.5329 0.053 Uiso 1 1 calc R . .
H79C H 0.7145 0.3322 0.6129 0.053 Uiso 1 1 calc R . .
C81 C 0.9202(3) 0.1594(3) 0.5826(3) 0.0352(13) Uani 1 1 d D C .
H81A H 0.9224 0.1093 0.5930 0.053 Uiso 1 1 calc R . .
H81B H 0.9763 0.1848 0.5923 0.053 Uiso 1 1 calc R . .
H81C H 0.8930 0.1631 0.5328 0.053 Uiso 1 1 calc R . .
Sb4 Sb 0.36348(2) 0.175300(17) 0.736462(17) 0.02769(9) Uani 1 1 d . . .
Cl7 Cl 0.28097(8) 0.15284(7) 0.61807(7) 0.0397(3) Uani 1 1 d . . .
Cl8A Cl 0.1234(2) 0.10398(17) 0.84446(16) 0.0432(7) Uani 0.808(6) 1 d PD D 1
C107 C 0.148(2) 0.2132(9) 0.7309(17) 0.050(3) Uani 0.808(6) 1 d PD D 1
H10V H 0.1747 0.2493 0.7683 0.075 Uiso 0.808(6) 1 calc PR D 1
H10W H 0.0881 0.2128 0.7206 0.075 Uiso 0.808(6) 1 calc PR D 1
H10X H 0.1673 0.2241 0.6883 0.075 Uiso 0.808(6) 1 calc PR D 1
Cl8B Cl 0.149(2) 0.2248(10) 0.7366(18) 0.050(3) Uani 0.192(6) 1 d PD D 2
C139 C 0.122(4) 0.117(4) 0.833(3) 0.0432(7) Uani 0.192(6) 1 d PD D 2
H11A H 0.1525 0.1502 0.8725 0.065 Uiso 0.192(6) 1 calc PR D 2
H11B H 0.1211 0.0684 0.8495 0.065 Uiso 0.192(6) 1 calc PR D 2
H11C H 0.0657 0.1280 0.8175 0.065 Uiso 0.192(6) 1 calc PR D 2
Si4 Si 0.17336(9) 0.12573(7) 0.75999(8) 0.0316(3) Uani 1 1 d D . .
N4 N 0.2790(2) 0.12540(19) 0.78695(19) 0.0249(9) Uani 1 1 d . D .
C82 C 0.3192(3) 0.0871(2) 0.8462(2) 0.0256(11) Uani 1 1 d . . .
C83 C 0.2990(3) 0.0139(2) 0.8520(2) 0.0278(11) Uani 1 1 d . D .
C84 C 0.3385(3) -0.0180(3) 0.9117(3) 0.0369(13) Uani 1 1 d . . .
H84 H 0.3245 -0.0675 0.9159 0.044 Uiso 1 1 calc R D .
C85 C 0.3974(3) 0.0198(3) 0.9649(3) 0.0412(14) Uani 1 1 d . D .
H85 H 0.4219 -0.0031 1.0060 0.049 Uiso 1 1 calc R . .
C86 C 0.4203(3) 0.0906(3) 0.9583(3) 0.0370(13) Uani 1 1 d . . .
H86 H 0.4627 0.1162 0.9941 0.044 Uiso 1 1 calc R D .
C87 C 0.3822(3) 0.1256(3) 0.8996(2) 0.0267(11) Uani 1 1 d . D .
C88 C 0.2391(3) -0.0352(2) 0.7971(3) 0.0297(12) Uani 1 1 d . . .
C89 C 0.1693(3) -0.0734(3) 0.8129(3) 0.0329(12) Uani 1 1 d . D .
C90 C 0.1184(3) -0.1225(3) 0.7637(3) 0.0388(14) Uani 1 1 d . . .
H90 H 0.0700 -0.1463 0.7743 0.047 Uiso 1 1 calc R D .
C91 C 0.1351(3) -0.1381(3) 0.6996(3) 0.0361(13) Uani 1 1 d . D .
C92 C 0.2046(3) -0.1009(3) 0.6856(3) 0.0373(13) Uani 1 1 d . . .
H92 H 0.2168 -0.1104 0.6416 0.045 Uiso 1 1 calc R D .
C93 C 0.2577(3) -0.0504(2) 0.7320(3) 0.0301(12) Uani 1 1 d . D .
C94 C 0.4124(3) 0.2026(3) 0.8970(2) 0.0283(11) Uani 1 1 d . . .
C95 C 0.3669(3) 0.2547(3) 0.9139(3) 0.0335(12) Uani 1 1 d . D .
C96 C 0.3986(3) 0.3258(3) 0.9144(3) 0.0373(13) Uani 1 1 d . . .
H96 H 0.3679 0.3608 0.9257 0.045 Uiso 1 1 calc R D .
C97 C 0.4738(4) 0.3472(3) 0.8989(3) 0.0418(14) Uani 1 1 d . D .
C98 C 0.5178(3) 0.2962(3) 0.8831(3) 0.0410(14) Uani 1 1 d . . .
H98 H 0.5689 0.3105 0.8715 0.049 Uiso 1 1 calc R D .
C99 C 0.4898(3) 0.2234(3) 0.8836(3) 0.0339(12) Uani 1 1 d . D .
C100 C 0.1474(4) -0.0653(3) 0.8832(3) 0.0467(15) Uani 1 1 d . . .
H10A H 0.1748 -0.0197 0.9066 0.070 Uiso 1 1 calc R D .
H10B H 0.1656 -0.1040 0.9131 0.070 Uiso 1 1 calc R . .
H10C H 0.0876 -0.0669 0.8755 0.070 Uiso 1 1 calc R . .
C101 C 0.0811(4) -0.1943(3) 0.6491(3) 0.0521(16) Uani 1 1 d . . .
H10D H 0.0924 -0.1887 0.6024 0.078 Uiso 1 1 calc R D .
H10E H 0.0233 -0.1896 0.6461 0.078 Uiso 1 1 calc R . .
H10F H 0.0924 -0.2412 0.6657 0.078 Uiso 1 1 calc R . .
C102 C 0.3335(3) -0.0160(3) 0.7129(3) 0.0356(13) Uani 1 1 d . . .
H10G H 0.3729 0.0055 0.7555 0.053 Uiso 1 1 calc R D .
H10H H 0.3192 0.0209 0.6793 0.053 Uiso 1 1 calc R . .
H10I H 0.3582 -0.0516 0.6914 0.053 Uiso 1 1 calc R . .
C103 C 0.2870(3) 0.2355(3) 0.9337(3) 0.0465(15) Uani 1 1 d . . .
H10J H 0.2518 0.1997 0.8995 0.070 Uiso 1 1 calc R D .
H10K H 0.2595 0.2779 0.9336 0.070 Uiso 1 1 calc R . .
H10L H 0.2971 0.2164 0.9808 0.070 Uiso 1 1 calc R . .
C104 C 0.5061(4) 0.4252(3) 0.9005(3) 0.0586(18) Uani 1 1 d . . .
H10M H 0.5646 0.4307 0.9004 0.088 Uiso 1 1 calc R D .
H10N H 0.4992 0.4487 0.9432 0.088 Uiso 1 1 calc R . .
H10O H 0.4755 0.4466 0.8588 0.088 Uiso 1 1 calc R . .
C105 C 0.5448(3) 0.1706(3) 0.8713(3) 0.0476(15) Uani 1 1 d . . .
H10P H 0.5809 0.1913 0.8421 0.071 Uiso 1 1 calc R D .
H10Q H 0.5110 0.1276 0.8471 0.071 Uiso 1 1 calc R . .
H10R H 0.5784 0.1585 0.9166 0.071 Uiso 1 1 calc R . .
C106 C 0.3401(3) 0.2835(2) 0.7342(3) 0.0342(13) Uani 1 1 d . . .
H10S H 0.3880 0.3141 0.7259 0.051 Uiso 1 1 calc R . .
H10T H 0.3300 0.2977 0.7794 0.051 Uiso 1 1 calc R . .
H10U H 0.2917 0.2882 0.6961 0.051 Uiso 1 1 calc R . .
C108 C 0.1161(3) 0.0630(3) 0.6868(3) 0.0331(12) Uani 1 1 d D D .
H10Y H 0.1153 0.0144 0.7031 0.050 Uiso 1 1 calc R . .
H10Z H 0.1432 0.0675 0.6476 0.050 Uiso 1 1 calc R . .
H10 H 0.0596 0.0737 0.6711 0.050 Uiso 1 1 calc R . .
C109 C 0.9418(8) 0.5906(13) 0.4578(7) 0.179(10) Uani 0.785(11) 1 d PG E 1
H109 H 0.9960 0.5791 0.4631 0.214 Uiso 0.785(11) 1 calc PR E 1
C110 C 0.8747(15) 0.5375(7) 0.4397(7) 0.176(10) Uani 0.785(11) 1 d PG E 1
H110 H 0.8831 0.4898 0.4326 0.211 Uiso 0.785(11) 1 calc PR E 1
C111 C 0.7954(11) 0.5543(11) 0.4319(5) 0.184(11) Uani 0.785(11) 1 d PG E 1
H111 H 0.7496 0.5181 0.4195 0.220 Uiso 0.785(11) 1 calc PR E 1
C112 C 0.7832(7) 0.6241(13) 0.4422(6) 0.168(9) Uani 0.785(11) 1 d PG E 1
H112 H 0.7289 0.6356 0.4369 0.202 Uiso 0.785(11) 1 calc PR E 1
C113 C 0.8502(14) 0.6772(8) 0.4603(6) 0.137(6) Uani 0.785(11) 1 d PG E 1
H113 H 0.8419 0.7249 0.4674 0.164 Uiso 0.785(11) 1 calc PR E 1
C114 C 0.9296(10) 0.6604(10) 0.4681(6) 0.152(7) Uani 0.785(11) 1 d PG E 1
H114 H 0.9754 0.6966 0.4805 0.182 Uiso 0.785(11) 1 calc PR E 1
C115 C 0.794(4) 0.588(3) 0.449(2) 0.179(10) Uani 0.215(11) 1 d PG E 2
H115 H 0.7618 0.6233 0.4573 0.214 Uiso 0.215(11) 1 calc PR E 2
C116 C 0.756(2) 0.518(3) 0.432(2) 0.152(7) Uani 0.215(11) 1 d PG E 2
H116 H 0.6992 0.5061 0.4295 0.182 Uiso 0.215(11) 1 calc PR E 2
C117 C 0.803(3) 0.466(2) 0.4201(17) 0.137(6) Uani 0.215(11) 1 d PG E 2
H117 H 0.7774 0.4186 0.4088 0.164 Uiso 0.215(11) 1 calc PR E 2
C118 C 0.886(3) 0.484(3) 0.424(2) 0.168(9) Uani 0.215(11) 1 d PG E 2
H118 H 0.9181 0.4483 0.4159 0.202 Uiso 0.215(11) 1 calc PR E 2
C119 C 0.924(2) 0.553(4) 0.441(2) 0.184(11) Uani 0.215(11) 1 d PG E 2
H119 H 0.9807 0.5655 0.4437 0.220 Uiso 0.215(11) 1 calc PR E 2
C120 C 0.877(4) 0.605(2) 0.453(2) 0.176(10) Uani 0.215(11) 1 d PG E 2
H120 H 0.9026 0.6530 0.4644 0.211 Uiso 0.215(11) 1 calc PR E 2
C121 C 0.8927(17) 1.080(3) 0.9138(13) 0.142(12) Uani 0.334(4) 1 d PG F 1
H121 H 0.9378 1.1133 0.9085 0.171 Uiso 0.334(4) 1 calc PR F 1
C122 C 0.818(2) 1.103(2) 0.9136(14) 0.141(9) Uani 0.334(4) 1 d PG F 1
H122 H 0.8113 1.1515 0.9081 0.169 Uiso 0.334(4) 1 calc PR F 1
C123 C 0.7517(17) 1.054(3) 0.9214(17) 0.172(15) Uani 0.334(4) 1 d PG F 1
H123 H 0.7003 1.0699 0.9212 0.206 Uiso 0.334(4) 1 calc PR F 1
C124 C 0.761(3) 0.983(3) 0.9295(19) 0.21(3) Uani 0.334(4) 1 d PG F 1
H124 H 0.7159 0.9500 0.9348 0.248 Uiso 0.334(4) 1 calc PR F 1
C125 C 0.836(3) 0.960(2) 0.9297(17) 0.159(15) Uani 0.334(4) 1 d PG F 1
H125 H 0.8423 0.9118 0.9352 0.190 Uiso 0.334(4) 1 calc PR F 1
C126 C 0.902(2) 1.009(3) 0.9219(15) 0.168(16) Uani 0.334(4) 1 d PG F 1
H126 H 0.9533 0.9935 0.9221 0.202 Uiso 0.334(4) 1 calc PR F 1
C127 C 0.813(4) 0.9991(18) 0.930(2) 0.159(15) Uani 0.251(11) 1 d PG G 2
H127 H 0.7964 0.9495 0.9303 0.190 Uiso 0.251(11) 1 calc PR G 2
C128 C 0.895(3) 1.024(3) 0.9345(17) 0.168(16) Uani 0.251(11) 1 d PG G 2
H128 H 0.9348 0.9923 0.9382 0.202 Uiso 0.251(11) 1 calc PR G 2
C129 C 0.9202(18) 1.097(3) 0.9339(13) 0.142(12) Uani 0.251(11) 1 d PG G 2
H129 H 0.9764 1.1143 0.9371 0.171 Uiso 0.251(11) 1 calc PR G 2
C130 C 0.863(3) 1.1441(18) 0.9285(14) 0.141(9) Uani 0.251(11) 1 d PG G 2
H130 H 0.8797 1.1936 0.9280 0.169 Uiso 0.251(11) 1 calc PR G 2
C131 C 0.781(2) 1.119(3) 0.9238(19) 0.172(15) Uani 0.251(11) 1 d PG G 2
H131 H 0.7413 1.1509 0.9201 0.206 Uiso 0.251(11) 1 calc PR G 2
C132 C 0.756(2) 1.046(3) 0.924(2) 0.21(3) Uani 0.251(11) 1 d PG G 2
H132 H 0.6997 1.0288 0.9212 0.248 Uiso 0.251(11) 1 calc PR G 2
C133 C 0.7668(13) 0.9365(18) 0.9480(9) 0.142(12) Uani 0.415(11) 1 d PG H 3
H133 H 0.7169 0.9137 0.9567 0.171 Uiso 0.415(11) 1 calc PR H 3
C134 C 0.7724(18) 1.0067(17) 0.9285(11) 0.168(16) Uani 0.415(11) 1 d PG H 3
H134 H 0.7263 1.0317 0.9238 0.202 Uiso 0.415(11) 1 calc PR H 3
C135 C 0.845(2) 1.0401(13) 0.9157(13) 0.159(15) Uani 0.415(11) 1 d PG H 3
H135 H 0.8492 1.0880 0.9024 0.190 Uiso 0.415(11) 1 calc PR H 3
C136 C 0.9128(15) 1.0034(19) 0.9225(12) 0.21(3) Uani 0.415(11) 1 d PG H 3
H136 H 0.9627 1.0263 0.9138 0.248 Uiso 0.415(11) 1 calc PR H 3
C137 C 0.9071(14) 0.9333(19) 0.9421(10) 0.172(15) Uani 0.415(11) 1 d PG H 3
H137 H 0.9532 0.9082 0.9467 0.206 Uiso 0.415(11) 1 calc PR H 3
C138 C 0.8342(19) 0.8999(13) 0.9548(9) 0.141(9) Uani 0.415(11) 1 d PG H 3
H138 H 0.8303 0.8519 0.9682 0.169 Uiso 0.415(11) 1 calc PR H 3
 
loop_
 _atom_site_aniso_label
 _atom_site_aniso_U_11
 _atom_site_aniso_U_22
 _atom_site_aniso_U_33
 _atom_site_aniso_U_23
 _atom_site_aniso_U_13
 _atom_site_aniso_U_12
Sb1 0.0327(2) 0.0300(2) 0.02673(19) 0.00370(15) 0.00913(15) 0.00911(15)
Cl1 0.0477(9) 0.0567(9) 0.0291(7) 0.0057(7) 0.0059(6) 0.0143(7)
Cl2A 0.048(2) 0.049(2) 0.065(2) 0.0054(16) 0.0325(13) 0.0085(13)
C26A 0.051(3) 0.033(2) 0.101(3) -0.011(3) 0.0130(19) -0.008(2)
Cl2B 0.051(3) 0.033(2) 0.101(3) -0.011(3) 0.0130(19) -0.008(2)
C26B 0.048(2) 0.049(2) 0.065(2) 0.0054(16) 0.0325(13) 0.0085(13)
Si1 0.0306(8) 0.0314(8) 0.0516(10) 0.0029(7) 0.0107(7) -0.0001(7)
N1 0.028(2) 0.024(2) 0.028(2) 0.0023(18) 0.0102(18) 0.0047(17)
C1 0.027(3) 0.026(3) 0.029(3) 0.001(2) 0.009(2) -0.002(2)
C2 0.036(3) 0.025(3) 0.035(3) 0.006(2) 0.017(2) 0.006(2)
C3 0.046(3) 0.029(3) 0.044(4) -0.002(3) 0.015(3) 0.002(3)
C4 0.052(4) 0.044(4) 0.034(3) -0.007(3) 0.007(3) 0.001(3)
C5 0.044(3) 0.044(3) 0.030(3) 0.002(3) 0.003(3) 0.006(3)
C6 0.030(3) 0.027(3) 0.032(3) 0.002(2) 0.012(2) 0.000(2)
C7 0.035(3) 0.035(3) 0.019(3) 0.006(2) 0.003(2) 0.006(2)
C8 0.031(3) 0.043(3) 0.025(3) 0.006(2) 0.004(2) 0.007(3)
C9 0.029(3) 0.054(4) 0.028(3) 0.007(3) 0.003(2) 0.011(3)
C10 0.046(3) 0.036(3) 0.025(3) 0.000(2) -0.001(2) 0.015(3)
C11 0.039(3) 0.033(3) 0.028(3) 0.008(2) 0.003(2) 0.002(2)
C12 0.035(3) 0.031(3) 0.028(3) 0.004(2) 0.007(2) 0.006(2)
C13 0.036(3) 0.019(3) 0.036(3) 0.006(2) 0.012(2) 0.002(2)
C14 0.045(3) 0.019(3) 0.044(3) 0.004(2) 0.018(3) -0.001(2)
C15 0.043(3) 0.035(3) 0.037(3) 0.009(3) 0.016(3) -0.001(3)
C16 0.035(3) 0.033(3) 0.050(4) 0.012(3) 0.009(3) -0.002(2)
C17 0.037(3) 0.033(3) 0.053(4) 0.009(3) 0.019(3) 0.006(2)
C18 0.043(3) 0.026(3) 0.037(3) 0.001(2) 0.016(3) 0.006(2)
C19 0.031(3) 0.058(4) 0.052(4) 0.014(3) 0.011(3) 0.001(3)
C20 0.062(4) 0.038(3) 0.050(4) -0.006(3) -0.003(3) 0.025(3)
C21 0.050(4) 0.044(4) 0.054(4) 0.014(3) 0.024(3) 0.008(3)
C22 0.047(3) 0.032(3) 0.047(4) 0.013(3) 0.025(3) 0.004(3)
C23 0.042(4) 0.062(4) 0.059(4) 0.028(3) 0.006(3) 0.008(3)
C24 0.053(4) 0.043(3) 0.053(4) 0.005(3) 0.026(3) 0.016(3)
C25 0.051(4) 0.025(3) 0.033(3) 0.004(2) 0.010(3) 0.013(2)
C27 0.024(3) 0.038(3) 0.053(4) 0.001(3) 0.001(3) 0.004(2)
Sb2 0.0304(2) 0.0305(2) 0.0270(2) -0.00110(15) 0.00837(15) 0.00219(15)
Cl3 0.0458(8) 0.0484(8) 0.0350(8) -0.0021(6) 0.0199(6) 0.0011(7)
Cl4A 0.0424(18) 0.0303(18) 0.086(3) -0.0074(18) 0.0108(15) 0.0125(15)
C54A 0.044(2) 0.055(2) 0.045(2) 0.002(2) -0.008(2) 0.0099(16)
Cl4B 0.044(2) 0.055(2) 0.045(2) 0.002(2) -0.008(2) 0.0099(16)
C54B 0.0424(18) 0.0303(18) 0.086(3) -0.0074(18) 0.0108(15) 0.0125(15)
Si2 0.0300(8) 0.0340(8) 0.0424(9) 0.0050(7) 0.0075(7) 0.0101(7)
N2 0.028(2) 0.024(2) 0.028(2) 0.0030(18) 0.0058(18) 0.0080(17)
C28 0.029(3) 0.030(3) 0.027(3) 0.002(2) 0.002(2) 0.009(2)
C29 0.028(3) 0.030(3) 0.029(3) 0.002(2) 0.003(2) 0.010(2)
C30 0.044(3) 0.028(3) 0.041(3) -0.005(3) 0.006(3) 0.011(3)
C31 0.054(4) 0.041(3) 0.039(3) -0.003(3) 0.021(3) 0.015(3)
C32 0.040(3) 0.039(3) 0.035(3) 0.008(3) 0.017(3) 0.012(3)
C33 0.032(3) 0.030(3) 0.029(3) 0.004(2) 0.006(2) 0.011(2)
C34 0.035(3) 0.019(3) 0.041(3) 0.001(2) 0.010(2) 0.011(2)
C35 0.038(3) 0.033(3) 0.041(3) 0.010(3) 0.011(3) 0.017(2)
C36 0.053(4) 0.042(4) 0.046(4) 0.012(3) 0.014(3) 0.020(3)
C37 0.047(4) 0.045(4) 0.064(5) 0.019(3) 0.017(3) 0.012(3)
C38 0.039(3) 0.034(3) 0.068(5) 0.001(3) 0.007(3) 0.003(3)
C39 0.034(3) 0.026(3) 0.049(4) 0.000(3) 0.007(3) 0.007(2)
C40 0.039(3) 0.029(3) 0.029(3) 0.007(2) 0.018(2) 0.010(2)
C41 0.040(3) 0.037(3) 0.027(3) 0.010(2) 0.012(2) 0.009(3)
C42 0.049(4) 0.037(3) 0.041(3) 0.016(3) 0.023(3) 0.013(3)
C43 0.042(3) 0.033(3) 0.045(3) 0.009(3) 0.022(3) 0.006(3)
C44 0.033(3) 0.041(3) 0.031(3) 0.002(2) 0.012(2) 0.002(2)
C45 0.031(3) 0.038(3) 0.029(3) 0.011(2) 0.015(2) 0.009(2)
C46 0.051(4) 0.035(3) 0.036(3) 0.004(3) 0.003(3) 0.011(3)
C47 0.077(5) 0.076(5) 0.099(6) 0.048(5) 0.032(5) 0.003(4)
C48 0.050(4) 0.040(3) 0.050(4) -0.006(3) 0.000(3) 0.008(3)
C49 0.051(4) 0.044(3) 0.042(4) 0.022(3) 0.003(3) 0.010(3)
C50 0.054(4) 0.037(3) 0.057(4) 0.007(3) 0.024(3) 0.007(3)
C51 0.034(3) 0.038(3) 0.041(3) 0.012(3) 0.012(3) 0.014(2)
C52 0.048(3) 0.023(3) 0.043(3) -0.005(2) 0.018(3) -0.001(2)
C53 0.036(3) 0.042(3) 0.060(4) 0.003(3) 0.016(3) 0.003(3)
Sb3 0.0312(2) 0.03060(19) 0.02377(19) 0.00232(15) 0.00810(15) 0.00931(15)
Cl5 0.0529(9) 0.0510(9) 0.0305(7) 0.0091(6) 0.0213(6) 0.0165(7)
Cl6A 0.0382(16) 0.0496(12) 0.0328(14) -0.0008(14) -0.0010(13) 0.0033(10)
C80A 0.042(3) 0.026(3) 0.068(3) 0.000(3) 0.015(2) -0.004(3)
Cl6B 0.042(3) 0.026(3) 0.068(3) 0.000(3) 0.015(2) -0.004(3)
C80B 0.0382(16) 0.0496(12) 0.0328(14) -0.0008(14) -0.0010(13) 0.0033(10)
Si3 0.0283(8) 0.0279(8) 0.0346(8) -0.0046(6) 0.0106(6) 0.0009(6)
N3 0.023(2) 0.023(2) 0.024(2) 0.0006(17) 0.0097(17) 0.0029(17)
C55 0.028(3) 0.021(2) 0.017(2) -0.003(2) 0.006(2) -0.001(2)
C56 0.025(3) 0.028(3) 0.025(3) -0.009(2) 0.008(2) 0.000(2)
C57 0.036(3) 0.038(3) 0.032(3) -0.004(2) 0.020(2) 0.002(2)
C58 0.046(3) 0.032(3) 0.029(3) 0.005(2) 0.015(3) 0.001(3)
C59 0.037(3) 0.027(3) 0.024(3) 0.003(2) 0.006(2) 0.003(2)
C60 0.029(3) 0.027(3) 0.016(2) -0.002(2) 0.006(2) 0.001(2)
C61 0.032(3) 0.030(3) 0.027(3) -0.003(2) 0.018(2) 0.003(2)
C62 0.038(3) 0.033(3) 0.023(3) -0.007(2) 0.014(2) 0.001(2)
C63 0.041(3) 0.028(3) 0.042(3) -0.011(2) 0.020(3) 0.000(2)
C64 0.042(3) 0.033(3) 0.043(3) -0.002(3) 0.027(3) 0.009(3)
C65 0.033(3) 0.035(3) 0.034(3) -0.003(3) 0.015(2) 0.003(2)
C66 0.037(3) 0.026(3) 0.033(3) -0.001(2) 0.019(2) 0.005(2)
C67 0.023(3) 0.018(2) 0.027(3) -0.003(2) 0.005(2) -0.004(2)
C68 0.028(3) 0.019(3) 0.032(3) -0.002(2) -0.001(2) -0.001(2)
C69 0.029(3) 0.026(3) 0.040(3) 0.000(2) 0.002(2) 0.007(2)
C70 0.037(3) 0.026(3) 0.042(3) 0.000(2) 0.008(3) 0.010(2)
C71 0.038(3) 0.031(3) 0.026(3) -0.007(2) 0.006(2) 0.007(2)
C72 0.029(3) 0.019(2) 0.023(3) -0.001(2) 0.004(2) 0.005(2)
C73 0.046(3) 0.036(3) 0.039(3) -0.014(3) 0.012(3) 0.002(3)
C74 0.056(4) 0.035(3) 0.060(4) -0.001(3) 0.026(3) 0.014(3)
C75 0.032(3) 0.036(3) 0.042(3) -0.007(3) 0.011(3) 0.003(2)
C76 0.040(3) 0.035(3) 0.033(3) -0.001(2) 0.000(2) 0.006(2)
C77 0.060(4) 0.055(4) 0.053(4) -0.004(3) 0.019(3) 0.030(3)
C78 0.036(3) 0.034(3) 0.022(3) -0.001(2) 0.004(2) 0.009(2)
C79 0.049(3) 0.025(3) 0.038(3) 0.004(2) 0.019(3) 0.014(2)
C81 0.031(3) 0.038(3) 0.038(3) -0.003(3) 0.012(2) 0.005(2)
Sb4 0.0309(2) 0.02783(19) 0.02436(19) -0.00142(15) 0.00772(15) 0.00215(15)
Cl7 0.0469(8) 0.0436(8) 0.0248(7) -0.0024(6) 0.0045(6) 0.0006(6)
Cl8A 0.0351(10) 0.0537(18) 0.0432(15) 0.0032(10) 0.0149(10) 0.0046(10)
C107 0.045(3) 0.031(5) 0.070(5) 0.000(5) 0.004(3) 0.013(4)
Cl8B 0.045(3) 0.031(5) 0.070(5) 0.000(5) 0.004(3) 0.013(4)
C139 0.0351(10) 0.0537(18) 0.0432(15) 0.0032(10) 0.0149(10) 0.0046(10)
Si4 0.0277(8) 0.0328(8) 0.0333(8) -0.0002(7) 0.0033(6) 0.0083(6)
N4 0.026(2) 0.026(2) 0.022(2) 0.0015(17) 0.0058(17) 0.0036(17)
C82 0.027(3) 0.031(3) 0.021(3) 0.000(2) 0.009(2) 0.007(2)
C83 0.032(3) 0.029(3) 0.025(3) 0.002(2) 0.009(2) 0.009(2)
C84 0.040(3) 0.032(3) 0.040(3) 0.006(3) 0.008(3) 0.008(2)
C85 0.043(3) 0.048(4) 0.029(3) 0.005(3) -0.004(3) 0.016(3)
C86 0.029(3) 0.047(4) 0.032(3) -0.001(3) -0.001(2) 0.007(3)
C87 0.022(3) 0.035(3) 0.024(3) -0.003(2) 0.004(2) 0.009(2)
C88 0.037(3) 0.027(3) 0.026(3) 0.004(2) 0.006(2) 0.009(2)
C89 0.037(3) 0.030(3) 0.032(3) 0.006(2) 0.009(2) 0.005(2)
C90 0.030(3) 0.031(3) 0.053(4) 0.009(3) 0.008(3) -0.002(2)
C91 0.039(3) 0.024(3) 0.042(3) 0.003(2) 0.003(3) 0.008(2)
C92 0.047(3) 0.033(3) 0.032(3) -0.002(3) 0.006(3) 0.013(3)
C93 0.037(3) 0.023(3) 0.031(3) 0.003(2) 0.007(2) 0.009(2)
C94 0.030(3) 0.034(3) 0.017(3) -0.005(2) 0.000(2) 0.004(2)
C95 0.033(3) 0.041(3) 0.026(3) -0.008(2) 0.006(2) 0.006(2)
C96 0.048(4) 0.035(3) 0.027(3) -0.009(2) 0.003(3) 0.008(3)
C97 0.048(4) 0.037(3) 0.030(3) -0.007(3) -0.005(3) -0.002(3)
C98 0.037(3) 0.055(4) 0.026(3) 0.001(3) 0.005(2) -0.009(3)
C99 0.028(3) 0.047(3) 0.023(3) -0.006(2) 0.001(2) 0.001(2)
C100 0.048(4) 0.052(4) 0.046(4) 0.009(3) 0.024(3) 0.004(3)
C101 0.053(4) 0.034(3) 0.058(4) -0.004(3) -0.005(3) 0.002(3)
C102 0.045(3) 0.032(3) 0.034(3) -0.002(2) 0.017(3) 0.008(2)
C103 0.046(4) 0.051(4) 0.046(4) -0.014(3) 0.018(3) 0.008(3)
C104 0.068(5) 0.039(4) 0.054(4) 0.002(3) -0.006(3) -0.008(3)
C105 0.032(3) 0.065(4) 0.046(4) -0.015(3) 0.013(3) 0.004(3)
C106 0.046(3) 0.024(3) 0.031(3) 0.002(2) 0.007(3) 0.004(2)
C108 0.025(3) 0.036(3) 0.034(3) -0.002(2) -0.001(2) 0.003(2)
C109 0.19(2) 0.26(2) 0.143(17) 0.102(19) 0.100(16) 0.13(2)
C110 0.27(3) 0.162(18) 0.111(14) 0.065(15) 0.08(2) 0.01(2)
C111 0.18(2) 0.30(3) 0.054(9) 0.062(14) 0.024(13) -0.038(18)
C112 0.158(18) 0.27(3) 0.086(12) 0.056(16) 0.022(11) 0.062(18)
C113 0.170(15) 0.191(17) 0.079(9) 0.030(10) 0.066(11) 0.063(15)
C114 0.131(15) 0.23(2) 0.107(11) 0.049(13) 0.064(10) 0.007(13)
C115 0.19(2) 0.26(2) 0.143(17) 0.102(19) 0.100(16) 0.13(2)
C116 0.131(15) 0.23(2) 0.107(11) 0.049(13) 0.064(10) 0.007(13)
C117 0.170(15) 0.191(17) 0.079(9) 0.030(10) 0.066(11) 0.063(15)
C118 0.158(18) 0.27(3) 0.086(12) 0.056(16) 0.022(11) 0.062(18)
C119 0.18(2) 0.30(3) 0.054(9) 0.062(14) 0.024(13) -0.038(18)
C120 0.27(3) 0.162(18) 0.111(14) 0.065(15) 0.08(2) 0.01(2)
C121 0.091(17) 0.30(4) 0.025(10) -0.051(14) -0.014(10) 0.046(18)
C122 0.14(2) 0.22(3) 0.040(10) -0.002(12) -0.012(13) 0.00(2)
C123 0.12(2) 0.33(5) 0.063(13) -0.06(2) 0.007(13) 0.05(2)
C124 0.11(2) 0.46(9) 0.032(15) -0.01(3) -0.005(14) 0.04(4)
C125 0.18(3) 0.25(4) 0.044(12) -0.05(3) 0.033(17) 0.02(3)
C126 0.18(3) 0.31(4) 0.055(19) -0.03(2) 0.05(2) 0.11(3)
C127 0.18(3) 0.25(4) 0.044(12) -0.05(3) 0.033(17) 0.02(3)
C128 0.18(3) 0.31(4) 0.055(19) -0.03(2) 0.05(2) 0.11(3)
C129 0.091(17) 0.30(4) 0.025(10) -0.051(14) -0.014(10) 0.046(18)
C130 0.14(2) 0.22(3) 0.040(10) -0.002(12) -0.012(13) 0.00(2)
C131 0.12(2) 0.33(5) 0.063(13) -0.06(2) 0.007(13) 0.05(2)
C132 0.11(2) 0.46(9) 0.032(15) -0.01(3) -0.005(14) 0.04(4)
C133 0.091(17) 0.30(4) 0.025(10) -0.051(14) -0.014(10) 0.046(18)
C134 0.18(3) 0.31(4) 0.055(19) -0.03(2) 0.05(2) 0.11(3)
C135 0.18(3) 0.25(4) 0.044(12) -0.05(3) 0.033(17) 0.02(3)
C136 0.11(2) 0.46(9) 0.032(15) -0.01(3) -0.005(14) 0.04(4)
C137 0.12(2) 0.33(5) 0.063(13) -0.06(2) 0.007(13) 0.05(2)
C138 0.14(2) 0.22(3) 0.040(10) -0.002(12) -0.012(13) 0.00(2)

#==============================================================================

# MOLECULAR GEOMETRY 
 
_geom_special_details
;
 All s.u.'s (except the s.u. in the dihedral angle between two l.s. planes)
 are estimated using the full covariance matrix.  The cell s.u.'s are taken
 into account individually in the estimation of s.u.'s in distances, angles
 and torsion angles; correlations between s.u.'s in cell parameters are only
 used when they are defined by crystal symmetry.  An approximate (isotropic)
 treatment of cell s.u.'s is used for estimating s.u.'s involving l.s. planes.
;
 
loop_
 _geom_bond_atom_site_label_1
 _geom_bond_atom_site_label_2
 _geom_bond_distance
 _geom_bond_site_symmetry_2
 _geom_bond_publ_flag
Sb1 N1 2.071(4) . ?
Sb1 C25 2.137(5) . ?
Sb1 Cl1 2.3975(13) . ?
Cl2A Si1 2.022(5) . ?
C26A Si1 1.838(17) . ?
C26A H26A 0.9800 . ?
C26A H26B 0.9800 . ?
C26A H26C 0.9800 . ?
Cl2B Si1 2.025(6) . ?
C26B Si1 1.842(18) . ?
C26B H26D 0.9800 . ?
C26B H26E 0.9800 . ?
C26B H26F 0.9800 . ?
Si1 N1 1.733(4) . ?
Si1 C27 1.851(5) . ?
N1 C1 1.435(6) . ?
C1 C2 1.410(6) . ?
C1 C6 1.435(7) . ?
C2 C3 1.393(7) . ?
C2 C13 1.490(7) . ?
C3 C4 1.366(7) . ?
C3 H3 0.9500 . ?
C4 C5 1.376(7) . ?
C4 H4 0.9500 . ?
C5 C6 1.378(7) . ?
C5 H5 0.9500 . ?
C6 C7 1.500(7) . ?
C7 C12 1.399(7) . ?
C7 C8 1.405(7) . ?
C8 C9 1.394(7) . ?
C8 C19 1.516(7) . ?
C9 C10 1.381(7) . ?
C9 H9 0.9500 . ?
C10 C11 1.387(7) . ?
C10 C20 1.519(7) . ?
C11 C12 1.387(7) . ?
C11 H11 0.9500 . ?
C12 C21 1.501(7) . ?
C13 C18 1.410(7) . ?
C13 C14 1.411(7) . ?
C14 C15 1.392(7) . ?
C14 C22 1.496(7) . ?
C15 C16 1.371(7) . ?
C15 H15 0.9500 . ?
C16 C17 1.383(7) . ?
C16 C23 1.511(7) . ?
C17 C18 1.393(7) . ?
C17 H17 0.9500 . ?
C18 C24 1.508(7) . ?
C19 H19A 0.9800 . ?
C19 H19B 0.9800 . ?
C19 H19C 0.9800 . ?
C20 H20A 0.9800 . ?
C20 H20B 0.9800 . ?
C20 H20C 0.9800 . ?
C21 H21A 0.9800 . ?
C21 H21B 0.9800 . ?
C21 H21C 0.9800 . ?
C22 H22A 0.9800 . ?
C22 H22B 0.9800 . ?
C22 H22C 0.9800 . ?
C23 H23A 0.9800 . ?
C23 H23B 0.9800 . ?
C23 H23C 0.9800 . ?
C24 H24A 0.9800 . ?
C24 H24B 0.9800 . ?
C24 H24C 0.9800 . ?
C25 H25A 0.9800 . ?
C25 H25B 0.9800 . ?
C25 H25C 0.9800 . ?
C27 H27A 0.9800 . ?
C27 H27B 0.9800 . ?
C27 H27C 0.9800 . ?
Sb2 N2 2.068(4) . ?
Sb2 C52 2.156(5) . ?
Sb2 Cl3 2.4054(13) . ?
Cl4A Si2 2.036(4) . ?
C54A Si2 1.845(17) . ?
C54A H54A 0.9800 . ?
C54A H54B 0.9800 . ?
C54A H54C 0.9800 . ?
Cl4B Si2 2.024(6) . ?
C54B Si2 1.837(17) . ?
C54B H54D 0.9800 . ?
C54B H54E 0.9800 . ?
C54B H54F 0.9800 . ?
Si2 N2 1.734(4) . ?
Si2 C53 1.840(5) . ?
N2 C28 1.456(6) . ?
C28 C33 1.402(7) . ?
C28 C29 1.417(7) . ?
C29 C30 1.396(7) . ?
C29 C34 1.504(7) . ?
C30 C31 1.366(7) . ?
C30 H30 0.9500 . ?
C31 C32 1.366(7) . ?
C31 H31 0.9500 . ?
C32 C33 1.392(7) . ?
C32 H32 0.9500 . ?
C33 C40 1.497(7) . ?
C34 C39 1.397(7) . ?
C34 C35 1.412(7) . ?
C35 C36 1.379(7) . ?
C35 C46 1.496(7) . ?
C36 C37 1.386(8) . ?
C36 H36 0.9500 . ?
C37 C38 1.371(8) . ?
C37 C47 1.525(8) . ?
C38 C39 1.390(7) . ?
C38 H38 0.9500 . ?
C39 C48 1.514(7) . ?
C40 C45 1.407(7) . ?
C40 C41 1.415(6) . ?
C41 C42 1.372(7) . ?
C41 C49 1.502(7) . ?
C42 C43 1.375(7) . ?
C42 H42 0.9500 . ?
C43 C44 1.381(7) . ?
C43 C50 1.513(7) . ?
C44 C45 1.396(7) . ?
C44 H44 0.9500 . ?
C45 C51 1.515(6) . ?
C46 H46A 0.9800 . ?
C46 H46B 0.9800 . ?
C46 H46C 0.9800 . ?
C47 H47A 0.9800 . ?
C47 H47B 0.9800 . ?
C47 H47C 0.9800 . ?
C48 H48A 0.9800 . ?
C48 H48B 0.9800 . ?
C48 H48C 0.9800 . ?
C49 H49A 0.9800 . ?
C49 H49B 0.9800 . ?
C49 H49C 0.9800 . ?
C50 H50A 0.9800 . ?
C50 H50B 0.9800 . ?
C50 H50C 0.9800 . ?
C51 H51A 0.9800 . ?
C51 H51B 0.9800 . ?
C51 H51C 0.9800 . ?
C52 H52A 0.9800 . ?
C52 H52B 0.9800 . ?
C52 H52C 0.9800 . ?
C53 H53A 0.9800 . ?
C53 H53B 0.9800 . ?
C53 H53C 0.9800 . ?
Sb3 N3 2.066(4) . ?
Sb3 C79 2.160(5) . ?
Sb3 Cl5 2.4078(13) . ?
Cl6A Si3 2.036(3) . ?
C80A Si3 1.851(15) . ?
C80A H80A 0.9800 . ?
C80A H80B 0.9800 . ?
C80A H80C 0.9800 . ?
Cl6B Si3 2.020(10) . ?
C80B Si3 1.848(19) . ?
C80B H80D 0.9800 . ?
C80B H80E 0.9800 . ?
C80B H80F 0.9800 . ?
Si3 N3 1.736(4) . ?
Si3 C81 1.844(5) . ?
N3 C55 1.439(6) . ?
C55 C56 1.406(6) . ?
C55 C60 1.417(6) . ?
C56 C57 1.385(7) . ?
C56 C61 1.503(6) . ?
C57 C58 1.374(7) . ?
C57 H57 0.9500 . ?
C58 C59 1.376(7) . ?
C58 H58 0.9500 . ?
C59 C60 1.399(6) . ?
C59 H59 0.9500 . ?
C60 C67 1.501(6) . ?
C61 C66 1.405(7) . ?
C61 C62 1.408(6) . ?
C62 C63 1.397(7) . ?
C62 C73 1.502(7) . ?
C63 C64 1.378(7) . ?
C63 H63 0.9500 . ?
C64 C65 1.393(7) . ?
C64 C74 1.514(7) . ?
C65 C66 1.398(6) . ?
C65 H65 0.9500 . ?
C66 C75 1.518(7) . ?
C67 C72 1.400(6) . ?
C67 C68 1.404(6) . ?
C68 C69 1.383(7) . ?
C68 C76 1.513(7) . ?
C69 C70 1.393(7) . ?
C69 H69 0.9500 . ?
C70 C71 1.384(7) . ?
C70 C77 1.513(7) . ?
C71 C72 1.388(6) . ?
C71 H71 0.9500 . ?
C72 C78 1.504(6) . ?
C73 H73A 0.9800 . ?
C73 H73B 0.9800 . ?
C73 H73C 0.9800 . ?
C74 H74A 0.9800 . ?
C74 H74B 0.9800 . ?
C74 H74C 0.9800 . ?
C75 H75A 0.9800 . ?
C75 H75B 0.9800 . ?
C75 H75C 0.9800 . ?
C76 H76A 0.9800 . ?
C76 H76B 0.9800 . ?
C76 H76C 0.9800 . ?
C77 H77A 0.9800 . ?
C77 H77B 0.9800 . ?
C77 H77C 0.9800 . ?
C78 H78A 0.9800 . ?
C78 H78B 0.9800 . ?
C78 H78C 0.9800 . ?
C79 H79A 0.9800 . ?
C79 H79B 0.9800 . ?
C79 H79C 0.9800 . ?
C81 H81A 0.9800 . ?
C81 H81B 0.9800 . ?
C81 H81C 0.9800 . ?
Sb4 N4 2.061(4) . ?
Sb4 C106 2.144(4) . ?
Sb4 Cl7 2.4020(13) . ?
Cl8A Si4 2.048(2) . ?
C107 Si4 1.835(13) . ?
C107 H10V 0.9800 . ?
C107 H10W 0.9800 . ?
C107 H10X 0.9800 . ?
Cl8B Si4 2.015(15) . ?
C139 Si4 1.842(18) . ?
C139 H11A 0.9800 . ?
C139 H11B 0.9800 . ?
C139 H11C 0.9800 . ?
Si4 N4 1.736(4) . ?
Si4 C108 1.846(5) . ?
N4 C82 1.452(6) . ?
C82 C83 1.404(6) . ?
C82 C87 1.417(6) . ?
C83 C84 1.389(6) . ?
C83 C88 1.505(7) . ?
C84 C85 1.376(7) . ?
C84 H84 0.9500 . ?
C85 C86 1.369(7) . ?
C85 H85 0.9500 . ?
C86 C87 1.397(6) . ?
C86 H86 0.9500 . ?
C87 C94 1.494(7) . ?
C88 C89 1.404(7) . ?
C88 C93 1.415(7) . ?
C89 C90 1.382(7) . ?
C89 C100 1.517(7) . ?
C90 C91 1.386(7) . ?
C90 H90 0.9500 . ?
C91 C92 1.376(7) . ?
C91 C101 1.497(7) . ?
C92 C93 1.386(7) . ?
C92 H92 0.9500 . ?
C93 C102 1.490(7) . ?
C94 C99 1.402(7) . ?
C94 C95 1.411(7) . ?
C95 C96 1.388(7) . ?
C95 C103 1.492(7) . ?
C96 C97 1.384(7) . ?
C96 H96 0.9500 . ?
C97 C98 1.370(8) . ?
C97 C104 1.511(7) . ?
C98 C99 1.405(7) . ?
C98 H98 0.9500 . ?
C99 C105 1.506(7) . ?
C100 H10A 0.9800 . ?
C100 H10B 0.9800 . ?
C100 H10C 0.9800 . ?
C101 H10D 0.9800 . ?
C101 H10E 0.9800 . ?
C101 H10F 0.9800 . ?
C102 H10G 0.9800 . ?
C102 H10H 0.9800 . ?
C102 H10I 0.9800 . ?
C103 H10J 0.9800 . ?
C103 H10K 0.9800 . ?
C103 H10L 0.9800 . ?
C104 H10M 0.9800 . ?
C104 H10N 0.9800 . ?
C104 H10O 0.9800 . ?
C105 H10P 0.9800 . ?
C105 H10Q 0.9800 . ?
C105 H10R 0.9800 . ?
C106 H10S 0.9800 . ?
C106 H10T 0.9800 . ?
C106 H10U 0.9800 . ?
C108 H10Y 0.9800 . ?
C108 H10Z 0.9800 . ?
C108 H10 0.9800 . ?
C109 C110 1.3900 . ?
C109 C114 1.3900 . ?
C109 H109 0.9500 . ?
C110 C111 1.3900 . ?
C110 H110 0.9500 . ?
C111 C112 1.3900 . ?
C111 H111 0.9500 . ?
C112 C113 1.3900 . ?
C112 H112 0.9500 . ?
C113 C114 1.3900 . ?
C113 H113 0.9500 . ?
C114 H114 0.9500 . ?
C115 C116 1.3900 . ?
C115 C120 1.3900 . ?
C115 H115 0.9500 . ?
C116 C117 1.3900 . ?
C116 H116 0.9500 . ?
C117 C118 1.3900 . ?
C117 H117 0.9500 . ?
C118 C119 1.3900 . ?
C118 H118 0.9500 . ?
C119 C120 1.3900 . ?
C119 H119 0.9500 . ?
C120 H120 0.9500 . ?
C121 C122 1.3900 . ?
C121 C126 1.3900 . ?
C121 H121 0.9500 . ?
C122 C123 1.3900 . ?
C122 H122 0.9500 . ?
C123 C124 1.3900 . ?
C123 H123 0.9500 . ?
C124 C125 1.3900 . ?
C124 H124 0.9500 . ?
C125 C126 1.3900 . ?
C125 H125 0.9500 . ?
C126 H126 0.9500 . ?
C127 C128 1.3900 . ?
C127 C132 1.3900 . ?
C127 H127 0.9500 . ?
C128 C129 1.3900 . ?
C128 H128 0.9500 . ?
C129 C130 1.3900 . ?
C129 H129 0.9500 . ?
C130 C131 1.3900 . ?
C130 H130 0.9500 . ?
C131 C132 1.3900 . ?
C131 H131 0.9500 . ?
C132 H132 0.9500 . ?
C133 C134 1.3900 . ?
C133 C138 1.3900 . ?
C133 H133 0.9500 . ?
C134 C135 1.3900 . ?
C134 H134 0.9500 . ?
C135 C136 1.3900 . ?
C135 H135 0.9500 . ?
C136 C137 1.3900 . ?
C136 H136 0.9500 . ?
C137 C138 1.3900 . ?
C137 H137 0.9500 . ?
C138 H138 0.9500 . ?
 
loop_
 _geom_angle_atom_site_label_1
 _geom_angle_atom_site_label_2
 _geom_angle_atom_site_label_3
 _geom_angle
 _geom_angle_site_symmetry_1
 _geom_angle_site_symmetry_3
 _geom_angle_publ_flag
N1 Sb1 C25 104.48(18) . . ?
N1 Sb1 Cl1 96.38(11) . . ?
C25 Sb1 Cl1 90.93(14) . . ?
Si1 C26A H26A 109.5 . . ?
Si1 C26A H26B 109.5 . . ?
Si1 C26A H26C 109.5 . . ?
Si1 C26B H26D 109.5 . . ?
Si1 C26B H26E 109.5 . . ?
H26D C26B H26E 109.5 . . ?
Si1 C26B H26F 109.5 . . ?
H26D C26B H26F 109.5 . . ?
H26E C26B H26F 109.5 . . ?
N1 Si1 C26A 108.8(15) . . ?
N1 Si1 C26B 108.7(17) . . ?
C26A Si1 C26B 103(2) . . ?
N1 Si1 C27 117.5(2) . . ?
C26A Si1 C27 106.5(15) . . ?
C26B Si1 C27 110.9(17) . . ?
N1 Si1 Cl2A 109.1(3) . . ?
C26A Si1 Cl2A 105.1(15) . . ?
C26B Si1 Cl2A 2.1(19) . . ?
C27 Si1 Cl2A 109.0(3) . . ?
N1 Si1 Cl2B 110.6(4) . . ?
C26A Si1 Cl2B 2.3(19) . . ?
C26B Si1 Cl2B 101.3(17) . . ?
C27 Si1 Cl2B 106.7(5) . . ?
Cl2A Si1 Cl2B 103.0(5) . . ?
C1 N1 Si1 123.4(3) . . ?
C1 N1 Sb1 111.5(3) . . ?
Si1 N1 Sb1 125.1(2) . . ?
C2 C1 N1 122.8(4) . . ?
C2 C1 C6 117.8(4) . . ?
N1 C1 C6 119.4(4) . . ?
C3 C2 C1 118.9(5) . . ?
C3 C2 C13 117.7(4) . . ?
C1 C2 C13 123.3(4) . . ?
C4 C3 C2 123.0(5) . . ?
C4 C3 H3 118.5 . . ?
C2 C3 H3 118.5 . . ?
C3 C4 C5 118.6(5) . . ?
C3 C4 H4 120.7 . . ?
C5 C4 H4 120.7 . . ?
C4 C5 C6 121.7(5) . . ?
C4 C5 H5 119.2 . . ?
C6 C5 H5 119.2 . . ?
C5 C6 C1 120.0(4) . . ?
C5 C6 C7 117.4(5) . . ?
C1 C6 C7 122.6(4) . . ?
C12 C7 C8 119.0(5) . . ?
C12 C7 C6 121.5(5) . . ?
C8 C7 C6 119.1(4) . . ?
C9 C8 C7 119.5(5) . . ?
C9 C8 C19 118.0(5) . . ?
C7 C8 C19 122.5(5) . . ?
C10 C9 C8 121.6(5) . . ?
C10 C9 H9 119.2 . . ?
C8 C9 H9 119.2 . . ?
C9 C10 C11 118.3(5) . . ?
C9 C10 C20 121.1(5) . . ?
C11 C10 C20 120.6(5) . . ?
C12 C11 C10 121.7(5) . . ?
C12 C11 H11 119.1 . . ?
C10 C11 H11 119.1 . . ?
C11 C12 C7 119.8(5) . . ?
C11 C12 C21 118.8(5) . . ?
C7 C12 C21 121.4(5) . . ?
C18 C13 C14 118.8(5) . . ?
C18 C13 C2 121.1(4) . . ?
C14 C13 C2 119.8(4) . . ?
C15 C14 C13 119.1(5) . . ?
C15 C14 C22 117.6(5) . . ?
C13 C14 C22 123.2(5) . . ?
C16 C15 C14 122.7(5) . . ?
C16 C15 H15 118.7 . . ?
C14 C15 H15 118.7 . . ?
C15 C16 C17 117.8(5) . . ?
C15 C16 C23 121.1(5) . . ?
C17 C16 C23 121.1(5) . . ?
C16 C17 C18 122.3(5) . . ?
C16 C17 H17 118.8 . . ?
C18 C17 H17 118.8 . . ?
C17 C18 C13 119.1(5) . . ?
C17 C18 C24 117.8(5) . . ?
C13 C18 C24 123.0(5) . . ?
C8 C19 H19A 109.5 . . ?
C8 C19 H19B 109.5 . . ?
H19A C19 H19B 109.5 . . ?
C8 C19 H19C 109.5 . . ?
H19A C19 H19C 109.5 . . ?
H19B C19 H19C 109.5 . . ?
C10 C20 H20A 109.5 . . ?
C10 C20 H20B 109.5 . . ?
H20A C20 H20B 109.5 . . ?
C10 C20 H20C 109.5 . . ?
H20A C20 H20C 109.5 . . ?
H20B C20 H20C 109.5 . . ?
C12 C21 H21A 109.5 . . ?
C12 C21 H21B 109.5 . . ?
H21A C21 H21B 109.5 . . ?
C12 C21 H21C 109.5 . . ?
H21A C21 H21C 109.5 . . ?
H21B C21 H21C 109.5 . . ?
C14 C22 H22A 109.5 . . ?
C14 C22 H22B 109.5 . . ?
H22A C22 H22B 109.5 . . ?
C14 C22 H22C 109.5 . . ?
H22A C22 H22C 109.5 . . ?
H22B C22 H22C 109.5 . . ?
C16 C23 H23A 109.5 . . ?
C16 C23 H23B 109.5 . . ?
H23A C23 H23B 109.5 . . ?
C16 C23 H23C 109.5 . . ?
H23A C23 H23C 109.5 . . ?
H23B C23 H23C 109.5 . . ?
C18 C24 H24A 109.5 . . ?
C18 C24 H24B 109.5 . . ?
H24A C24 H24B 109.5 . . ?
C18 C24 H24C 109.5 . . ?
H24A C24 H24C 109.5 . . ?
H24B C24 H24C 109.5 . . ?
Sb1 C25 H25A 109.5 . . ?
Sb1 C25 H25B 109.5 . . ?
H25A C25 H25B 109.5 . . ?
Sb1 C25 H25C 109.5 . . ?
H25A C25 H25C 109.5 . . ?
H25B C25 H25C 109.5 . . ?
Si1 C27 H27A 109.5 . . ?
Si1 C27 H27B 109.5 . . ?
H27A C27 H27B 109.5 . . ?
Si1 C27 H27C 109.5 . . ?
H27A C27 H27C 109.5 . . ?
H27B C27 H27C 109.5 . . ?
N2 Sb2 C52 105.72(18) . . ?
N2 Sb2 Cl3 96.86(11) . . ?
C52 Sb2 Cl3 91.47(14) . . ?
Si2 C54A H54A 109.5 . . ?
Si2 C54A H54B 109.5 . . ?
Si2 C54A H54C 109.5 . . ?
Si2 C54B H54D 109.5 . . ?
Si2 C54B H54E 109.5 . . ?
H54D C54B H54E 109.5 . . ?
Si2 C54B H54F 109.5 . . ?
H54D C54B H54F 109.5 . . ?
H54E C54B H54F 109.5 . . ?
N2 Si2 C54B 107.8(15) . . ?
N2 Si2 C53 117.3(2) . . ?
C54B Si2 C53 109.8(14) . . ?
N2 Si2 C54A 109.3(14) . . ?
C54B Si2 C54A 103(2) . . ?
C53 Si2 C54A 109.1(15) . . ?
N2 Si2 Cl4B 109.9(4) . . ?
C54B Si2 Cl4B 99.7(15) . . ?
C53 Si2 Cl4B 110.8(4) . . ?
C54A Si2 Cl4B 2.9(17) . . ?
N2 Si2 Cl4A 108.7(3) . . ?
C54B Si2 Cl4A 4.4(17) . . ?
C53 Si2 Cl4A 105.9(3) . . ?
C54A Si2 Cl4A 106.0(14) . . ?
Cl4B Si2 Cl4A 103.2(4) . . ?
C28 N2 Si2 123.4(3) . . ?
C28 N2 Sb2 111.1(3) . . ?
Si2 N2 Sb2 125.5(2) . . ?
C33 C28 C29 119.3(4) . . ?
C33 C28 N2 119.4(4) . . ?
C29 C28 N2 121.3(4) . . ?
C30 C29 C28 117.6(5) . . ?
C30 C29 C34 115.1(4) . . ?
C28 C29 C34 127.2(4) . . ?
C31 C30 C29 123.0(5) . . ?
C31 C30 H30 118.5 . . ?
C29 C30 H30 118.5 . . ?
C32 C31 C30 118.6(5) . . ?
C32 C31 H31 120.7 . . ?
C30 C31 H31 120.7 . . ?
C31 C32 C33 121.7(5) . . ?
C31 C32 H32 119.2 . . ?
C33 C32 H32 119.2 . . ?
C32 C33 C28 119.4(5) . . ?
C32 C33 C40 116.2(5) . . ?
C28 C33 C40 124.3(4) . . ?
C39 C34 C35 119.4(5) . . ?
C39 C34 C29 119.4(5) . . ?
C35 C34 C29 120.5(5) . . ?
C36 C35 C34 118.7(5) . . ?
C36 C35 C46 118.9(5) . . ?
C34 C35 C46 122.4(5) . . ?
C35 C36 C37 122.8(6) . . ?
C35 C36 H36 118.6 . . ?
C37 C36 H36 118.6 . . ?
C38 C37 C36 117.5(6) . . ?
C38 C37 C47 121.3(6) . . ?
C36 C37 C47 121.2(6) . . ?
C37 C38 C39 122.6(6) . . ?
C37 C38 H38 118.7 . . ?
C39 C38 H38 118.7 . . ?
C38 C39 C34 119.1(5) . . ?
C38 C39 C48 117.1(5) . . ?
C34 C39 C48 123.8(5) . . ?
C45 C40 C41 119.3(5) . . ?
C45 C40 C33 119.2(4) . . ?
C41 C40 C33 121.1(5) . . ?
C42 C41 C40 119.0(5) . . ?
C42 C41 C49 120.3(5) . . ?
C40 C41 C49 120.7(5) . . ?
C41 C42 C43 122.7(5) . . ?
C41 C42 H42 118.7 . . ?
C43 C42 H42 118.7 . . ?
C42 C43 C44 118.3(5) . . ?
C42 C43 C50 120.4(5) . . ?
C44 C43 C50 121.3(5) . . ?
C43 C44 C45 121.8(5) . . ?
C43 C44 H44 119.1 . . ?
C45 C44 H44 119.1 . . ?
C44 C45 C40 118.7(5) . . ?
C44 C45 C51 119.4(5) . . ?
C40 C45 C51 121.9(5) . . ?
C35 C46 H46A 109.5 . . ?
C35 C46 H46B 109.5 . . ?
H46A C46 H46B 109.5 . . ?
C35 C46 H46C 109.5 . . ?
H46A C46 H46C 109.5 . . ?
H46B C46 H46C 109.5 . . ?
C37 C47 H47A 109.5 . . ?
C37 C47 H47B 109.5 . . ?
H47A C47 H47B 109.5 . . ?
C37 C47 H47C 109.5 . . ?
H47A C47 H47C 109.5 . . ?
H47B C47 H47C 109.5 . . ?
C39 C48 H48A 109.5 . . ?
C39 C48 H48B 109.5 . . ?
H48A C48 H48B 109.5 . . ?
C39 C48 H48C 109.5 . . ?
H48A C48 H48C 109.5 . . ?
H48B C48 H48C 109.5 . . ?
C41 C49 H49A 109.5 . . ?
C41 C49 H49B 109.5 . . ?
H49A C49 H49B 109.5 . . ?
C41 C49 H49C 109.5 . . ?
H49A C49 H49C 109.5 . . ?
H49B C49 H49C 109.5 . . ?
C43 C50 H50A 109.5 . . ?
C43 C50 H50B 109.5 . . ?
H50A C50 H50B 109.5 . . ?
C43 C50 H50C 109.5 . . ?
H50A C50 H50C 109.5 . . ?
H50B C50 H50C 109.5 . . ?
C45 C51 H51A 109.5 . . ?
C45 C51 H51B 109.5 . . ?
H51A C51 H51B 109.5 . . ?
C45 C51 H51C 109.5 . . ?
H51A C51 H51C 109.5 . . ?
H51B C51 H51C 109.5 . . ?
Sb2 C52 H52A 109.5 . . ?
Sb2 C52 H52B 109.5 . . ?
H52A C52 H52B 109.5 . . ?
Sb2 C52 H52C 109.5 . . ?
H52A C52 H52C 109.5 . . ?
H52B C52 H52C 109.5 . . ?
Si2 C53 H53A 109.5 . . ?
Si2 C53 H53B 109.5 . . ?
H53A C53 H53B 109.5 . . ?
Si2 C53 H53C 109.5 . . ?
H53A C53 H53C 109.5 . . ?
H53B C53 H53C 109.5 . . ?
N3 Sb3 C79 105.03(17) . . ?
N3 Sb3 Cl5 96.58(10) . . ?
C79 Sb3 Cl5 91.14(14) . . ?
Si3 C80A H80A 109.5 . . ?
Si3 C80A H80B 109.5 . . ?
Si3 C80A H80C 109.5 . . ?
Si3 C80B H80D 109.5 . . ?
Si3 C80B H80E 109.5 . . ?
H80D C80B H80E 109.5 . . ?
Si3 C80B H80F 109.5 . . ?
H80D C80B H80F 109.5 . . ?
H80E C80B H80F 109.5 . . ?
N3 Si3 C81 117.8(2) . . ?
N3 Si3 C80B 108(2) . . ?
C81 Si3 C80B 108(2) . . ?
N3 Si3 C80A 109.4(11) . . ?
C81 Si3 C80A 107.1(11) . . ?
C80B Si3 C80A 106(3) . . ?
N3 Si3 Cl6B 110.9(7) . . ?
C81 Si3 Cl6B 108.1(7) . . ?
C80B Si3 Cl6B 103(3) . . ?
C80A Si3 Cl6B 2.9(17) . . ?
N3 Si3 Cl6A 108.7(2) . . ?
C81 Si3 Cl6A 108.3(3) . . ?
C80B Si3 Cl6A 1(3) . . ?
C80A Si3 Cl6A 104.8(11) . . ?
Cl6B Si3 Cl6A 101.9(7) . . ?
C55 N3 Si3 123.8(3) . . ?
C55 N3 Sb3 111.4(3) . . ?
Si3 N3 Sb3 124.8(2) . . ?
C56 C55 C60 118.1(4) . . ?
C56 C55 N3 119.8(4) . . ?
C60 C55 N3 122.0(4) . . ?
C57 C56 C55 120.7(4) . . ?
C57 C56 C61 115.9(4) . . ?
C55 C56 C61 123.4(4) . . ?
C58 C57 C56 121.2(5) . . ?
C58 C57 H57 119.4 . . ?
C56 C57 H57 119.4 . . ?
C57 C58 C59 118.8(5) . . ?
C57 C58 H58 120.6 . . ?
C59 C58 H58 120.6 . . ?
C58 C59 C60 122.2(5) . . ?
C58 C59 H59 118.9 . . ?
C60 C59 H59 118.9 . . ?
C59 C60 C55 118.7(4) . . ?
C59 C60 C67 115.0(4) . . ?
C55 C60 C67 126.2(4) . . ?
C66 C61 C62 119.6(4) . . ?
C66 C61 C56 119.0(4) . . ?
C62 C61 C56 121.2(4) . . ?
C63 C62 C61 118.7(5) . . ?
C63 C62 C73 119.9(4) . . ?
C61 C62 C73 121.3(4) . . ?
C64 C63 C62 122.5(5) . . ?
C64 C63 H63 118.7 . . ?
C62 C63 H63 118.7 . . ?
C63 C64 C65 118.3(5) . . ?
C63 C64 C74 120.5(5) . . ?
C65 C64 C74 121.2(5) . . ?
C64 C65 C66 121.4(5) . . ?
C64 C65 H65 119.3 . . ?
C66 C65 H65 119.3 . . ?
C65 C66 C61 119.4(5) . . ?
C65 C66 C75 118.2(5) . . ?
C61 C66 C75 122.3(4) . . ?
C72 C67 C68 119.1(4) . . ?
C72 C67 C60 120.5(4) . . ?
C68 C67 C60 119.9(4) . . ?
C69 C68 C67 119.6(5) . . ?
C69 C68 C76 117.1(4) . . ?
C67 C68 C76 123.3(4) . . ?
C68 C69 C70 122.0(5) . . ?
C68 C69 H69 119.0 . . ?
C70 C69 H69 119.0 . . ?
C71 C70 C69 117.6(5) . . ?
C71 C70 C77 121.1(5) . . ?
C69 C70 C77 121.3(5) . . ?
C70 C71 C72 122.1(5) . . ?
C70 C71 H71 118.9 . . ?
C72 C71 H71 118.9 . . ?
C71 C72 C67 119.5(4) . . ?
C71 C72 C78 117.1(4) . . ?
C67 C72 C78 123.3(4) . . ?
C62 C73 H73A 109.5 . . ?
C62 C73 H73B 109.5 . . ?
H73A C73 H73B 109.5 . . ?
C62 C73 H73C 109.5 . . ?
H73A C73 H73C 109.5 . . ?
H73B C73 H73C 109.5 . . ?
C64 C74 H74A 109.5 . . ?
C64 C74 H74B 109.5 . . ?
H74A C74 H74B 109.5 . . ?
C64 C74 H74C 109.5 . . ?
H74A C74 H74C 109.5 . . ?
H74B C74 H74C 109.5 . . ?
C66 C75 H75A 109.5 . . ?
C66 C75 H75B 109.5 . . ?
H75A C75 H75B 109.5 . . ?
C66 C75 H75C 109.5 . . ?
H75A C75 H75C 109.5 . . ?
H75B C75 H75C 109.5 . . ?
C68 C76 H76A 109.5 . . ?
C68 C76 H76B 109.5 . . ?
H76A C76 H76B 109.5 . . ?
C68 C76 H76C 109.5 . . ?
H76A C76 H76C 109.5 . . ?
H76B C76 H76C 109.5 . . ?
C70 C77 H77A 109.5 . . ?
C70 C77 H77B 109.5 . . ?
H77A C77 H77B 109.5 . . ?
C70 C77 H77C 109.5 . . ?
H77A C77 H77C 109.5 . . ?
H77B C77 H77C 109.5 . . ?
C72 C78 H78A 109.5 . . ?
C72 C78 H78B 109.5 . . ?
H78A C78 H78B 109.5 . . ?
C72 C78 H78C 109.5 . . ?
H78A C78 H78C 109.5 . . ?
H78B C78 H78C 109.5 . . ?
Sb3 C79 H79A 109.5 . . ?
Sb3 C79 H79B 109.5 . . ?
H79A C79 H79B 109.5 . . ?
Sb3 C79 H79C 109.5 . . ?
H79A C79 H79C 109.5 . . ?
H79B C79 H79C 109.5 . . ?
Si3 C81 H81A 109.5 . . ?
Si3 C81 H81B 109.5 . . ?
H81A C81 H81B 109.5 . . ?
Si3 C81 H81C 109.5 . . ?
H81A C81 H81C 109.5 . . ?
H81B C81 H81C 109.5 . . ?
N4 Sb4 C106 103.82(17) . . ?
N4 Sb4 Cl7 97.18(11) . . ?
C106 Sb4 Cl7 90.56(14) . . ?
Si4 C107 H10V 109.5 . . ?
Si4 C107 H10W 109.5 . . ?
Si4 C107 H10X 109.5 . . ?
Si4 C139 H11A 109.5 . . ?
Si4 C139 H11B 109.5 . . ?
H11A C139 H11B 109.5 . . ?
Si4 C139 H11C 109.5 . . ?
H11A C139 H11C 109.5 . . ?
H11B C139 H11C 109.5 . . ?
N4 Si4 C107 111.7(11) . . ?
N4 Si4 C139 113(2) . . ?
C107 Si4 C139 99(2) . . ?
N4 Si4 C108 117.1(2) . . ?
C107 Si4 C108 104.9(10) . . ?
C139 Si4 C108 109(3) . . ?
N4 Si4 Cl8B 109.8(10) . . ?
C107 Si4 Cl8B 5(2) . . ?
C139 Si4 Cl8B 96(2) . . ?
C108 Si4 Cl8B 109.6(10) . . ?
N4 Si4 Cl8A 108.46(18) . . ?
C107 Si4 Cl8A 106.9(10) . . ?
C139 Si4 Cl8A 8(2) . . ?
C108 Si4 Cl8A 107.3(2) . . ?
Cl8B Si4 Cl8A 103.7(10) . . ?
C82 N4 Si4 124.4(3) . . ?
C82 N4 Sb4 111.0(3) . . ?
Si4 N4 Sb4 124.6(2) . . ?
C83 C82 C87 119.1(4) . . ?
C83 C82 N4 122.7(4) . . ?
C87 C82 N4 118.2(4) . . ?
C84 C83 C82 118.9(4) . . ?
C84 C83 C88 115.6(4) . . ?
C82 C83 C88 125.5(4) . . ?
C85 C84 C83 122.0(5) . . ?
C85 C84 H84 119.0 . . ?
C83 C84 H84 119.0 . . ?
C86 C85 C84 119.5(5) . . ?
C86 C85 H85 120.2 . . ?
C84 C85 H85 120.2 . . ?
C85 C86 C87 120.9(5) . . ?
C85 C86 H86 119.6 . . ?
C87 C86 H86 119.6 . . ?
C86 C87 C82 119.5(5) . . ?
C86 C87 C94 116.7(4) . . ?
C82 C87 C94 123.8(4) . . ?
C89 C88 C93 118.8(5) . . ?
C89 C88 C83 120.4(4) . . ?
C93 C88 C83 120.3(5) . . ?
C90 C89 C88 119.7(5) . . ?
C90 C89 C100 117.3(5) . . ?
C88 C89 C100 123.0(5) . . ?
C89 C90 C91 122.5(5) . . ?
C89 C90 H90 118.7 . . ?
C91 C90 H90 118.7 . . ?
C92 C91 C90 116.8(5) . . ?
C92 C91 C101 121.9(5) . . ?
C90 C91 C101 121.2(5) . . ?
C91 C92 C93 123.7(5) . . ?
C91 C92 H92 118.2 . . ?
C93 C92 H92 118.2 . . ?
C92 C93 C88 118.5(5) . . ?
C92 C93 C102 119.1(5) . . ?
C88 C93 C102 122.4(5) . . ?
C99 C94 C95 119.4(5) . . ?
C99 C94 C87 119.8(4) . . ?
C95 C94 C87 120.5(5) . . ?
C96 C95 C94 119.1(5) . . ?
C96 C95 C103 119.0(5) . . ?
C94 C95 C103 121.8(5) . . ?
C97 C96 C95 122.0(5) . . ?
C97 C96 H96 119.0 . . ?
C95 C96 H96 119.0 . . ?
C98 C97 C96 118.5(5) . . ?
C98 C97 C104 121.3(6) . . ?
C96 C97 C104 120.2(5) . . ?
C97 C98 C99 122.0(5) . . ?
C97 C98 H98 119.0 . . ?
C99 C98 H98 119.0 . . ?
C94 C99 C98 118.8(5) . . ?
C94 C99 C105 122.3(5) . . ?
C98 C99 C105 118.9(5) . . ?
C89 C100 H10A 109.5 . . ?
C89 C100 H10B 109.5 . . ?
H10A C100 H10B 109.5 . . ?
C89 C100 H10C 109.5 . . ?
H10A C100 H10C 109.5 . . ?
H10B C100 H10C 109.5 . . ?
C91 C101 H10D 109.5 . . ?
C91 C101 H10E 109.5 . . ?
H10D C101 H10E 109.5 . . ?
C91 C101 H10F 109.5 . . ?
H10D C101 H10F 109.5 . . ?
H10E C101 H10F 109.5 . . ?
C93 C102 H10G 109.5 . . ?
C93 C102 H10H 109.5 . . ?
H10G C102 H10H 109.5 . . ?
C93 C102 H10I 109.5 . . ?
H10G C102 H10I 109.5 . . ?
H10H C102 H10I 109.5 . . ?
C95 C103 H10J 109.5 . . ?
C95 C103 H10K 109.5 . . ?
H10J C103 H10K 109.5 . . ?
C95 C103 H10L 109.5 . . ?
H10J C103 H10L 109.5 . . ?
H10K C103 H10L 109.5 . . ?
C97 C104 H10M 109.5 . . ?
C97 C104 H10N 109.5 . . ?
H10M C104 H10N 109.5 . . ?
C97 C104 H10O 109.5 . . ?
H10M C104 H10O 109.5 . . ?
H10N C104 H10O 109.5 . . ?
C99 C105 H10P 109.5 . . ?
C99 C105 H10Q 109.5 . . ?
H10P C105 H10Q 109.5 . . ?
C99 C105 H10R 109.5 . . ?
H10P C105 H10R 109.5 . . ?
H10Q C105 H10R 109.5 . . ?
Sb4 C106 H10S 109.5 . . ?
Sb4 C106 H10T 109.5 . . ?
H10S C106 H10T 109.5 . . ?
Sb4 C106 H10U 109.5 . . ?
H10S C106 H10U 109.5 . . ?
H10T C106 H10U 109.5 . . ?
Si4 C108 H10Y 109.5 . . ?
Si4 C108 H10Z 109.5 . . ?
H10Y C108 H10Z 109.5 . . ?
Si4 C108 H10 109.5 . . ?
H10Y C108 H10 109.5 . . ?
H10Z C108 H10 109.5 . . ?
C110 C109 C114 120.0 . . ?
C110 C109 H109 120.0 . . ?
C114 C109 H109 120.0 . . ?
C109 C110 C111 120.0 . . ?
C109 C110 H110 120.0 . . ?
C111 C110 H110 120.0 . . ?
C112 C111 C110 120.0 . . ?
C112 C111 H111 120.0 . . ?
C110 C111 H111 120.0 . . ?
C113 C112 C111 120.0 . . ?
C113 C112 H112 120.0 . . ?
C111 C112 H112 120.0 . . ?
C112 C113 C114 120.0 . . ?
C112 C113 H113 120.0 . . ?
C114 C113 H113 120.0 . . ?
C113 C114 C109 120.0 . . ?
C113 C114 H114 120.0 . . ?
C109 C114 H114 120.0 . . ?
C116 C115 C120 120.0 . . ?
C116 C115 H115 120.0 . . ?
C120 C115 H115 120.0 . . ?
C115 C116 C117 120.0 . . ?
C115 C116 H116 120.0 . . ?
C117 C116 H116 120.0 . . ?
C118 C117 C116 120.0 . . ?
C118 C117 H117 120.0 . . ?
C116 C117 H117 120.0 . . ?
C117 C118 C119 120.0 . . ?
C117 C118 H118 120.0 . . ?
C119 C118 H118 120.0 . . ?
C120 C119 C118 120.0 . . ?
C120 C119 H119 120.0 . . ?
C118 C119 H119 120.0 . . ?
C119 C120 C115 120.0 . . ?
C119 C120 H120 120.0 . . ?
C115 C120 H120 120.0 . . ?
C122 C121 C126 120.00(6) . . ?
C122 C121 H121 120.0 . . ?
C126 C121 H121 120.0 . . ?
C123 C122 C121 120.0 . . ?
C123 C122 H122 120.0 . . ?
C121 C122 H122 120.0 . . ?
C124 C123 C122 120.0 . . ?
C124 C123 H123 120.0 . . ?
C122 C123 H123 120.0 . . ?
C123 C124 C125 120.00(6) . . ?
C123 C124 H124 120.0 . . ?
C125 C124 H124 120.0 . . ?
C126 C125 C124 120.0 . . ?
C126 C125 H125 120.0 . . ?
C124 C125 H125 120.0 . . ?
C125 C126 C121 120.0 . . ?
C125 C126 H126 120.0 . . ?
C121 C126 H126 120.0 . . ?
C128 C127 C132 120.0 . . ?
C128 C127 H127 120.0 . . ?
C132 C127 H127 120.0 . . ?
C129 C128 C127 120.0 . . ?
C129 C128 H128 120.0 . . ?
C127 C128 H128 120.0 . . ?
C128 C129 C130 120.0 . . ?
C128 C129 H129 120.0 . . ?
C130 C129 H129 120.0 . . ?
C131 C130 C129 120.0 . . ?
C131 C130 H130 120.0 . . ?
C129 C130 H130 120.0 . . ?
C132 C131 C130 120.0 . . ?
C132 C131 H131 120.0 . . ?
C130 C131 H131 120.0 . . ?
C131 C132 C127 120.0 . . ?
C131 C132 H132 120.0 . . ?
C127 C132 H132 120.0 . . ?
C134 C133 C138 120.0 . . ?
C134 C133 H133 120.0 . . ?
C138 C133 H133 120.0 . . ?
C133 C134 C135 120.0 . . ?
C133 C134 H134 120.0 . . ?
C135 C134 H134 120.0 . . ?
C136 C135 C134 120.0 . . ?
C136 C135 H135 120.0 . . ?
C134 C135 H135 120.0 . . ?
C135 C136 C137 120.0 . . ?
C135 C136 H136 120.0 . . ?
C137 C136 H136 120.0 . . ?
C138 C137 C136 120.0 . . ?
C138 C137 H137 120.0 . . ?
C136 C137 H137 120.0 . . ?
C137 C138 C133 120.0 . . ?
C137 C138 H138 120.0 . . ?
C133 C138 H138 120.0 . . ?
 
loop_
 _geom_torsion_atom_site_label_1
 _geom_torsion_atom_site_label_2
 _geom_torsion_atom_site_label_3
 _geom_torsion_atom_site_label_4
 _geom_torsion
 _geom_torsion_site_symmetry_1
 _geom_torsion_site_symmetry_2
 _geom_torsion_site_symmetry_3
 _geom_torsion_site_symmetry_4
 _geom_torsion_publ_flag
C26A Si1 N1 C1 137.7(17) . . . . ?
C26B Si1 N1 C1 25.8(18) . . . . ?
C27 Si1 N1 C1 -101.1(4) . . . . ?
Cl2A Si1 N1 C1 23.5(5) . . . . ?
Cl2B Si1 N1 C1 136.1(6) . . . . ?
C26A Si1 N1 Sb1 -45.2(16) . . . . ?
C26B Si1 N1 Sb1 -157.2(17) . . . . ?
C27 Si1 N1 Sb1 75.9(3) . . . . ?
Cl2A Si1 N1 Sb1 -159.4(3) . . . . ?
Cl2B Si1 N1 Sb1 -46.8(5) . . . . ?
C25 Sb1 N1 C1 -126.6(3) . . . . ?
Cl1 Sb1 N1 C1 140.8(3) . . . . ?
C25 Sb1 N1 Si1 56.0(3) . . . . ?
Cl1 Sb1 N1 Si1 -36.6(2) . . . . ?
Si1 N1 C1 C2 56.4(6) . . . . ?
Sb1 N1 C1 C2 -121.0(4) . . . . ?
Si1 N1 C1 C6 -124.7(4) . . . . ?
Sb1 N1 C1 C6 57.9(5) . . . . ?
N1 C1 C2 C3 -177.0(4) . . . . ?
C6 C1 C2 C3 4.2(7) . . . . ?
N1 C1 C2 C13 6.9(7) . . . . ?
C6 C1 C2 C13 -172.0(4) . . . . ?
C1 C2 C3 C4 -1.3(8) . . . . ?
C13 C2 C3 C4 175.1(5) . . . . ?
C2 C3 C4 C5 -2.0(9) . . . . ?
C3 C4 C5 C6 2.3(8) . . . . ?
C4 C5 C6 C1 0.7(8) . . . . ?
C4 C5 C6 C7 -176.9(5) . . . . ?
C2 C1 C6 C5 -3.9(7) . . . . ?
N1 C1 C6 C5 177.1(4) . . . . ?
C2 C1 C6 C7 173.5(4) . . . . ?
N1 C1 C6 C7 -5.4(7) . . . . ?
C5 C6 C7 C12 -101.3(6) . . . . ?
C1 C6 C7 C12 81.2(6) . . . . ?
C5 C6 C7 C8 71.2(6) . . . . ?
C1 C6 C7 C8 -106.3(6) . . . . ?
C12 C7 C8 C9 -4.2(7) . . . . ?
C6 C7 C8 C9 -176.9(4) . . . . ?
C12 C7 C8 C19 175.1(5) . . . . ?
C6 C7 C8 C19 2.5(7) . . . . ?
C7 C8 C9 C10 3.3(8) . . . . ?
C19 C8 C9 C10 -176.0(5) . . . . ?
C8 C9 C10 C11 -0.9(8) . . . . ?
C8 C9 C10 C20 177.9(5) . . . . ?
C9 C10 C11 C12 -0.6(7) . . . . ?
C20 C10 C11 C12 -179.5(5) . . . . ?
C10 C11 C12 C7 -0.3(8) . . . . ?
C10 C11 C12 C21 178.6(5) . . . . ?
C8 C7 C12 C11 2.7(7) . . . . ?
C6 C7 C12 C11 175.2(4) . . . . ?
C8 C7 C12 C21 -176.1(5) . . . . ?
C6 C7 C12 C21 -3.6(7) . . . . ?
C3 C2 C13 C18 63.5(7) . . . . ?
C1 C2 C13 C18 -120.3(5) . . . . ?
C3 C2 C13 C14 -109.8(5) . . . . ?
C1 C2 C13 C14 66.4(7) . . . . ?
C18 C13 C14 C15 4.4(7) . . . . ?
C2 C13 C14 C15 177.8(4) . . . . ?
C18 C13 C14 C22 -172.9(5) . . . . ?
C2 C13 C14 C22 0.5(7) . . . . ?
C13 C14 C15 C16 0.2(8) . . . . ?
C22 C14 C15 C16 177.6(5) . . . . ?
C14 C15 C16 C17 -3.6(8) . . . . ?
C14 C15 C16 C23 177.6(5) . . . . ?
C15 C16 C17 C18 2.6(8) . . . . ?
C23 C16 C17 C18 -178.6(5) . . . . ?
C16 C17 C18 C13 1.9(8) . . . . ?
C16 C17 C18 C24 -177.1(5) . . . . ?
C14 C13 C18 C17 -5.3(7) . . . . ?
C2 C13 C18 C17 -178.7(4) . . . . ?
C14 C13 C18 C24 173.5(5) . . . . ?
C2 C13 C18 C24 0.2(8) . . . . ?
C54B Si2 N2 C28 -135.3(15) . . . . ?
C53 Si2 N2 C28 100.2(4) . . . . ?
C54A Si2 N2 C28 -24.6(15) . . . . ?
Cl4B Si2 N2 C28 -27.5(5) . . . . ?
Cl4A Si2 N2 C28 -139.8(4) . . . . ?
C54B Si2 N2 Sb2 45.7(15) . . . . ?
C53 Si2 N2 Sb2 -78.7(3) . . . . ?
C54A Si2 N2 Sb2 156.5(15) . . . . ?
Cl4B Si2 N2 Sb2 153.5(4) . . . . ?
Cl4A Si2 N2 Sb2 41.2(4) . . . . ?
C52 Sb2 N2 C28 124.8(3) . . . . ?
Cl3 Sb2 N2 C28 -141.7(3) . . . . ?
C52 Sb2 N2 Si2 -56.1(3) . . . . ?
Cl3 Sb2 N2 Si2 37.4(2) . . . . ?
Si2 N2 C28 C33 127.4(4) . . . . ?
Sb2 N2 C28 C33 -53.6(5) . . . . ?
Si2 N2 C28 C29 -54.3(6) . . . . ?
Sb2 N2 C28 C29 124.8(4) . . . . ?
C33 C28 C29 C30 -6.3(7) . . . . ?
N2 C28 C29 C30 175.4(4) . . . . ?
C33 C28 C29 C34 169.7(5) . . . . ?
N2 C28 C29 C34 -8.6(7) . . . . ?
C28 C29 C30 C31 2.2(8) . . . . ?
C34 C29 C30 C31 -174.3(5) . . . . ?
C29 C30 C31 C32 2.6(8) . . . . ?
C30 C31 C32 C33 -3.3(8) . . . . ?
C31 C32 C33 C28 -0.9(8) . . . . ?
C31 C32 C33 C40 178.9(5) . . . . ?
C29 C28 C33 C32 5.7(7) . . . . ?
N2 C28 C33 C32 -175.9(4) . . . . ?
C29 C28 C33 C40 -174.1(4) . . . . ?
N2 C28 C33 C40 4.3(7) . . . . ?
C30 C29 C34 C39 -58.3(6) . . . . ?
C28 C29 C34 C39 125.5(5) . . . . ?
C30 C29 C34 C35 111.4(5) . . . . ?
C28 C29 C34 C35 -64.7(7) . . . . ?
C39 C34 C35 C36 -2.3(7) . . . . ?
C29 C34 C35 C36 -172.0(4) . . . . ?
C39 C34 C35 C46 175.3(5) . . . . ?
C29 C34 C35 C46 5.5(7) . . . . ?
C34 C35 C36 C37 1.3(8) . . . . ?
C46 C35 C36 C37 -176.3(5) . . . . ?
C35 C36 C37 C38 -0.2(9) . . . . ?
C35 C36 C37 C47 178.0(6) . . . . ?
C36 C37 C38 C39 0.1(9) . . . . ?
C47 C37 C38 C39 -178.2(6) . . . . ?
C37 C38 C39 C34 -1.1(8) . . . . ?
C37 C38 C39 C48 178.4(5) . . . . ?
C35 C34 C39 C38 2.2(7) . . . . ?
C29 C34 C39 C38 172.0(4) . . . . ?
C35 C34 C39 C48 -177.3(5) . . . . ?
C29 C34 C39 C48 -7.4(7) . . . . ?
C32 C33 C40 C45 -72.6(6) . . . . ?
C28 C33 C40 C45 107.2(6) . . . . ?
C32 C33 C40 C41 99.8(6) . . . . ?
C28 C33 C40 C41 -80.3(6) . . . . ?
C45 C40 C41 C42 -2.4(7) . . . . ?
C33 C40 C41 C42 -174.9(5) . . . . ?
C45 C40 C41 C49 176.4(5) . . . . ?
C33 C40 C41 C49 4.0(7) . . . . ?
C40 C41 C42 C43 -1.4(8) . . . . ?
C49 C41 C42 C43 179.7(5) . . . . ?
C41 C42 C43 C44 3.0(8) . . . . ?
C41 C42 C43 C50 -176.7(5) . . . . ?
C42 C43 C44 C45 -0.7(8) . . . . ?
C50 C43 C44 C45 179.0(5) . . . . ?
C43 C44 C45 C40 -3.1(7) . . . . ?
C43 C44 C45 C51 176.1(5) . . . . ?
C41 C40 C45 C44 4.6(7) . . . . ?
C33 C40 C45 C44 177.2(4) . . . . ?
C41 C40 C45 C51 -174.6(4) . . . . ?
C33 C40 C45 C51 -2.1(7) . . . . ?
C81 Si3 N3 C55 96.8(4) . . . . ?
C80B Si3 N3 C55 -26(3) . . . . ?
C80A Si3 N3 C55 -140.6(12) . . . . ?
Cl6B Si3 N3 C55 -138.0(8) . . . . ?
Cl6A Si3 N3 C55 -26.8(4) . . . . ?
C81 Si3 N3 Sb3 -81.4(3) . . . . ?
C80B Si3 N3 Sb3 156(3) . . . . ?
C80A Si3 N3 Sb3 41.1(12) . . . . ?
Cl6B Si3 N3 Sb3 43.8(7) . . . . ?
Cl6A Si3 N3 Sb3 155.0(3) . . . . ?
C79 Sb3 N3 C55 125.9(3) . . . . ?
Cl5 Sb3 N3 C55 -141.1(3) . . . . ?
C79 Sb3 N3 Si3 -55.6(3) . . . . ?
Cl5 Sb3 N3 Si3 37.4(2) . . . . ?
Si3 N3 C55 C56 126.2(4) . . . . ?
Sb3 N3 C55 C56 -55.3(5) . . . . ?
Si3 N3 C55 C60 -53.9(5) . . . . ?
Sb3 N3 C55 C60 124.6(4) . . . . ?
C60 C55 C56 C57 5.3(7) . . . . ?
N3 C55 C56 C57 -174.9(4) . . . . ?
C60 C55 C56 C61 -173.7(4) . . . . ?
N3 C55 C56 C61 6.1(7) . . . . ?
C55 C56 C57 C58 -0.7(8) . . . . ?
C61 C56 C57 C58 178.4(5) . . . . ?
C56 C57 C58 C59 -3.5(8) . . . . ?
C57 C58 C59 C60 2.9(8) . . . . ?
C58 C59 C60 C55 1.7(7) . . . . ?
C58 C59 C60 C67 -174.1(4) . . . . ?
C56 C55 C60 C59 -5.7(6) . . . . ?
N3 C55 C60 C59 174.4(4) . . . . ?
C56 C55 C60 C67 169.6(4) . . . . ?
N3 C55 C60 C67 -10.3(7) . . . . ?
C57 C56 C61 C66 -74.0(6) . . . . ?
C55 C56 C61 C66 105.1(5) . . . . ?
C57 C56 C61 C62 99.9(5) . . . . ?
C55 C56 C61 C62 -81.0(6) . . . . ?
C66 C61 C62 C63 -3.1(7) . . . . ?
C56 C61 C62 C63 -177.0(4) . . . . ?
C66 C61 C62 C73 176.4(5) . . . . ?
C56 C61 C62 C73 2.6(7) . . . . ?
C61 C62 C63 C64 0.3(8) . . . . ?
C73 C62 C63 C64 -179.3(5) . . . . ?
C62 C63 C64 C65 1.1(8) . . . . ?
C62 C63 C64 C74 -177.1(5) . . . . ?
C63 C64 C65 C66 0.4(7) . . . . ?
C74 C64 C65 C66 178.5(5) . . . . ?
C64 C65 C66 C61 -3.2(7) . . . . ?
C64 C65 C66 C75 175.0(5) . . . . ?
C62 C61 C66 C65 4.6(7) . . . . ?
C56 C61 C66 C65 178.6(4) . . . . ?
C62 C61 C66 C75 -173.6(4) . . . . ?
C56 C61 C66 C75 0.4(7) . . . . ?
C59 C60 C67 C72 112.2(5) . . . . ?
C55 C60 C67 C72 -63.2(6) . . . . ?
C59 C60 C67 C68 -58.7(6) . . . . ?
C55 C60 C67 C68 125.9(5) . . . . ?
C72 C67 C68 C69 3.0(7) . . . . ?
C60 C67 C68 C69 174.1(4) . . . . ?
C72 C67 C68 C76 -177.6(4) . . . . ?
C60 C67 C68 C76 -6.6(7) . . . . ?
C67 C68 C69 C70 -0.5(7) . . . . ?
C76 C68 C69 C70 -179.9(5) . . . . ?
C68 C69 C70 C71 -1.4(8) . . . . ?
C68 C69 C70 C77 -178.1(5) . . . . ?
C69 C70 C71 C72 0.9(8) . . . . ?
C77 C70 C71 C72 177.6(5) . . . . ?
C70 C71 C72 C67 1.6(8) . . . . ?
C70 C71 C72 C78 -176.1(5) . . . . ?
C68 C67 C72 C71 -3.5(7) . . . . ?
C60 C67 C72 C71 -174.5(4) . . . . ?
C68 C67 C72 C78 174.0(4) . . . . ?
C60 C67 C72 C78 3.0(7) . . . . ?
C107 Si4 N4 C82 142.1(11) . . . . ?
C139 Si4 N4 C82 31(2) . . . . ?
C108 Si4 N4 C82 -96.9(4) . . . . ?
Cl8B Si4 N4 C82 137.3(11) . . . . ?
Cl8A Si4 N4 C82 24.6(4) . . . . ?
C107 Si4 N4 Sb4 -40.9(11) . . . . ?
C139 Si4 N4 Sb4 -152(2) . . . . ?
C108 Si4 N4 Sb4 80.1(3) . . . . ?
Cl8B Si4 N4 Sb4 -45.7(11) . . . . ?
Cl8A Si4 N4 Sb4 -158.4(2) . . . . ?
C106 Sb4 N4 C82 -126.6(3) . . . . ?
Cl7 Sb4 N4 C82 141.0(3) . . . . ?
C106 Sb4 N4 Si4 56.0(3) . . . . ?
Cl7 Sb4 N4 Si4 -36.3(2) . . . . ?
Si4 N4 C82 C83 55.5(6) . . . . ?
Sb4 N4 C82 C83 -121.8(4) . . . . ?
Si4 N4 C82 C87 -125.5(4) . . . . ?
Sb4 N4 C82 C87 57.2(5) . . . . ?
C87 C82 C83 C84 3.2(7) . . . . ?
N4 C82 C83 C84 -177.8(4) . . . . ?
C87 C82 C83 C88 -174.4(4) . . . . ?
N4 C82 C83 C88 4.6(7) . . . . ?
C82 C83 C84 C85 -0.6(8) . . . . ?
C88 C83 C84 C85 177.2(5) . . . . ?
C83 C84 C85 C86 -2.4(8) . . . . ?
C84 C85 C86 C87 2.8(8) . . . . ?
C85 C86 C87 C82 -0.2(7) . . . . ?
C85 C86 C87 C94 -179.2(5) . . . . ?
C83 C82 C87 C86 -2.8(7) . . . . ?
N4 C82 C87 C86 178.2(4) . . . . ?
C83 C82 C87 C94 176.1(4) . . . . ?
N4 C82 C87 C94 -2.9(7) . . . . ?
C84 C83 C88 C89 62.4(6) . . . . ?
C82 C83 C88 C89 -119.9(5) . . . . ?
C84 C83 C88 C93 -109.5(5) . . . . ?
C82 C83 C88 C93 68.2(6) . . . . ?
C93 C88 C89 C90 -2.9(7) . . . . ?
C83 C88 C89 C90 -175.0(4) . . . . ?
C93 C88 C89 C100 175.3(5) . . . . ?
C83 C88 C89 C100 3.2(7) . . . . ?
C88 C89 C90 C91 2.8(8) . . . . ?
C100 C89 C90 C91 -175.5(5) . . . . ?
C89 C90 C91 C92 -1.7(8) . . . . ?
C89 C90 C91 C101 176.7(5) . . . . ?
C90 C91 C92 C93 0.8(8) . . . . ?
C101 C91 C92 C93 -177.6(5) . . . . ?
C91 C92 C93 C88 -1.1(7) . . . . ?
C91 C92 C93 C102 176.9(5) . . . . ?
C89 C88 C93 C92 2.0(7) . . . . ?
C83 C88 C93 C92 174.1(4) . . . . ?
C89 C88 C93 C102 -175.9(4) . . . . ?
C83 C88 C93 C102 -3.8(7) . . . . ?
C86 C87 C94 C99 72.0(6) . . . . ?
C82 C87 C94 C99 -107.0(5) . . . . ?
C86 C87 C94 C95 -102.4(5) . . . . ?
C82 C87 C94 C95 78.6(6) . . . . ?
C99 C94 C95 C96 2.4(7) . . . . ?
C87 C94 C95 C96 176.7(4) . . . . ?
C99 C94 C95 C103 -175.6(5) . . . . ?
C87 C94 C95 C103 -1.2(7) . . . . ?
C94 C95 C96 C97 -0.2(8) . . . . ?
C103 C95 C96 C97 177.8(5) . . . . ?
C95 C96 C97 C98 -0.4(8) . . . . ?
C95 C96 C97 C104 -179.7(5) . . . . ?
C96 C97 C98 C99 -1.3(8) . . . . ?
C104 C97 C98 C99 178.0(5) . . . . ?
C95 C94 C99 C98 -3.9(7) . . . . ?
C87 C94 C99 C98 -178.3(4) . . . . ?
C95 C94 C99 C105 174.6(5) . . . . ?
C87 C94 C99 C105 0.2(7) . . . . ?
C97 C98 C99 C94 3.4(8) . . . . ?
C97 C98 C99 C105 -175.2(5) . . . . ?
C114 C109 C110 C111 0.0 . . . . ?
C109 C110 C111 C112 0.0 . . . . ?
C110 C111 C112 C113 0.0 . . . . ?
C111 C112 C113 C114 0.0 . . . . ?
C112 C113 C114 C109 0.0 . . . . ?
C110 C109 C114 C113 0.0 . . . . ?
C120 C115 C116 C117 0.0 . . . . ?
C115 C116 C117 C118 0.0 . . . . ?
C116 C117 C118 C119 0.0 . . . . ?
C117 C118 C119 C120 0.0 . . . . ?
C118 C119 C120 C115 0.0 . . . . ?
C116 C115 C120 C119 0.0 . . . . ?
C126 C121 C122 C123 0.0 . . . . ?
C121 C122 C123 C124 0.0 . . . . ?
C122 C123 C124 C125 0.0 . . . . ?
C123 C124 C125 C126 0.0 . . . . ?
C124 C125 C126 C121 0.0 . . . . ?
C122 C121 C126 C125 0.0 . . . . ?
C132 C127 C128 C129 0.0 . . . . ?
C127 C128 C129 C130 0.0 . . . . ?
C128 C129 C130 C131 0.0 . . . . ?
C129 C130 C131 C132 0.0 . . . . ?
C130 C131 C132 C127 0.0 . . . . ?
C128 C127 C132 C131 0.0 . . . . ?
C138 C133 C134 C135 0.0 . . . . ?
C133 C134 C135 C136 0.0 . . . . ?
C134 C135 C136 C137 0.0 . . . . ?
C135 C136 C137 C138 0.0 . . . . ?
C136 C137 C138 C133 0.0 . . . . ?
C134 C133 C138 C137 0.0 . . . . ?
 
_diffrn_measured_fraction_theta_max    0.983
_diffrn_reflns_theta_full              28.00
_diffrn_measured_fraction_theta_full   0.983
_refine_diff_density_max    0.891
_refine_diff_density_min   -0.879
_refine_diff_density_rms    0.113

#=============================================================================

data_av_ch08_mesnsime2cl_sbmecl
 
_audit_author_name                'Villinger, A.' 
_audit_creation_method            SHELXL-97 

#==============================================================================

# CHEMICAL DATA

_chemical_name_systematic
;
N-chlorodimethylsilyl-N-[2,4,6-tri-tert.-butylphenyl]amino-chloro-
methylstibane
;
_chemical_name_common             ?
_chemical_melting_point           ?
_chemical_formula_moiety          'C21 H38 Cl2 N Sb Si'
_chemical_formula_sum
 'C21 H38 Cl2 N Sb Si'
_chemical_formula_weight          525.26
 
loop_
 _atom_type_symbol
 _atom_type_description
 _atom_type_scat_dispersion_real
 _atom_type_scat_dispersion_imag
 _atom_type_scat_source
 'C'  'C'   0.0033   0.0016
 'International Tables Vol C Tables 4.2.6.8 and 6.1.1.4'
 'H'  'H'   0.0000   0.0000
 'International Tables Vol C Tables 4.2.6.8 and 6.1.1.4'
 'N'  'N'   0.0061   0.0033
 'International Tables Vol C Tables 4.2.6.8 and 6.1.1.4'
 'Cl'  'Cl'   0.1484   0.1585
 'International Tables Vol C Tables 4.2.6.8 and 6.1.1.4'
 'Sb'  'Sb'  -0.5866   1.5461
 'International Tables Vol C Tables 4.2.6.8 and 6.1.1.4'
 'Si'  'Si'   0.0817   0.0704
 'International Tables Vol C Tables 4.2.6.8 and 6.1.1.4'
 
#==============================================================================

# CRYSTAL DATA
 
_symmetry_cell_setting            monoclinic
_symmetry_space_group_name_H-M    'P 21/n'
_symmetry_space_group_name_Hall   '-P 2yn'
_symmetry_Int_Tables_number       14
 
loop_
 _symmetry_equiv_pos_as_xyz
 'x, y, z'
 '-x+1/2, y+1/2, -z+1/2'
 '-x, -y, -z'
 'x-1/2, -y-1/2, z-1/2'
 
_cell_length_a                    9.4575(2)
_cell_length_b                    17.0048(5)
_cell_length_c                    15.3164(4)
_cell_angle_alpha                 90.00
_cell_angle_beta                  90.3930(10)
_cell_angle_gamma                 90.00
_cell_volume                      2463.17(11)
_cell_formula_units_Z             4
_cell_measurement_temperature     173(2)
_cell_measurement_reflns_used     9830
_cell_measurement_theta_min       4.791
_cell_measurement_theta_max       64.740
 
_exptl_crystal_description        block
_exptl_crystal_colour             colourless
_exptl_crystal_size_max           0.33
_exptl_crystal_size_mid           0.22
_exptl_crystal_size_min           0.12
_exptl_crystal_density_meas       ?
_exptl_crystal_density_diffrn     1.416
_exptl_crystal_density_method     'not measured'
_exptl_crystal_F_000              1080
_exptl_absorpt_coefficient_mu     1.392
_exptl_absorpt_correction_type    'multi-scan'
_exptl_absorpt_correction_T_min   0.6566
_exptl_absorpt_correction_T_max   0.8508
_exptl_absorpt_process_details    '(SADABS; Sheldrick, 2004)'

#==============================================================================

# EXPERIMENTAL DATA
 
_exptl_special_details
;
 ?
;
 
_diffrn_ambient_temperature       173(2)
_diffrn_radiation_wavelength      0.71073
_diffrn_radiation_type            MoK\a
_diffrn_radiation_source          'sealed tube'
_diffrn_radiation_monochromator   graphite
_diffrn_measurement_device_type   'Bruker Apex Kappa II-CCD-diffractometer'
_diffrn_measurement_method        'phi and psi scans'
_diffrn_detector_area_resol_mean  ?
_diffrn_standards_number          ?
_diffrn_standards_interval_count  ?
_diffrn_standards_interval_time   ?
_diffrn_standards_decay_%         ?
_diffrn_reflns_number             41572
_diffrn_reflns_av_R_equivalents   0.0337
_diffrn_reflns_av_sigmaI/netI     0.0359
_diffrn_reflns_limit_h_min        -12
_diffrn_reflns_limit_h_max        14
_diffrn_reflns_limit_k_min        -25
_diffrn_reflns_limit_k_max        25
_diffrn_reflns_limit_l_min        -21
_diffrn_reflns_limit_l_max        23
_diffrn_reflns_theta_min          2.40
_diffrn_reflns_theta_max          32.50
_reflns_number_total              8903
_reflns_number_gt                 6908
_reflns_threshold_expression      >2\s(I)
 
_computing_data_collection        'Bruker Apex v2.0-2'
_computing_cell_refinement        'Bruker Apex v2.0-2'
_computing_data_reduction         'Bruker SAINT'
_computing_structure_solution     'SHELXS-97 (Sheldrick, 1997)'
_computing_structure_refinement   'SHELXL-97 (Sheldrick, 1997)'
_computing_molecular_graphics     'ORTEP-3 (Farrugia, 1997)' 
_computing_publication_material   'SHELXL-97'

#==============================================================================

# REFINEMENT DATA 

_refine_special_details
;
 All H atoms  were positioned geometrically and refined using a 
 riding model , with C---H = 0.98 (methyl groups), 0.99\%A (methylene groups), 
 1.00\%A (methine groups) or 0.95 \%A (aryl CH) and with <i>U</i>~iso~(H) = 
 1.5 times <i>U</i>~eq~(C) (methyl groups) or with <i>U</i>~iso~(H) = 1.2 times 
 <i>U</i>~eq~(C) (methylene  groups, aryl CH, methine groups). Torsion angles 
 of all methyl groups were allowed to refine.
 
 Refinement of F^2^ against ALL reflections.  The weighted R-factor wR and
 goodness of fit S are based on F^2^, conventional R-factors R are based
 on F, with F set to zero for negative F^2^. The threshold expression of
 F^2^ > 2\s(F^2^) is used only for calculating R-factors(gt) etc. and is
 not relevant to the choice of reflections for refinement.  R-factors based
 on F^2^ are statistically about twice as large as those based on F, and R-
 factors based on ALL data will be even larger.
;
 
_refine_ls_structure_factor_coef  Fsqd
_refine_ls_matrix_type            full
_refine_ls_weighting_scheme       calc
_refine_ls_weighting_details
 'calc w=1/[\s^2^(Fo^2^)+(0.0357P)^2^+0.0000P] where P=(Fo^2^+2Fc^2^)/3'
_atom_sites_solution_primary      direct
_atom_sites_solution_secondary    difmap
_atom_sites_solution_hydrogens    geom
_refine_ls_hydrogen_treatment     constr
_refine_ls_extinction_method      none
_refine_ls_extinction_coef        ?
_refine_ls_number_reflns          8903
_refine_ls_number_parameters      247
_refine_ls_number_restraints      0
_refine_ls_R_factor_all           0.0447
_refine_ls_R_factor_gt            0.0281
_refine_ls_wR_factor_ref          0.0690
_refine_ls_wR_factor_gt           0.0657
_refine_ls_goodness_of_fit_ref    1.002
_refine_ls_restrained_S_all       1.002
_refine_ls_shift/su_max           0.004
_refine_ls_shift/su_mean          0.000

#==============================================================================

# ATOMIC COORDINATES AND DISPLACEMENT PARAMETERS
 
loop_
 _atom_site_label
 _atom_site_type_symbol
 _atom_site_fract_x
 _atom_site_fract_y
 _atom_site_fract_z
 _atom_site_U_iso_or_equiv
 _atom_site_adp_type
 _atom_site_occupancy
 _atom_site_symmetry_multiplicity
 _atom_site_calc_flag
 _atom_site_refinement_flags
 _atom_site_disorder_assembly
 _atom_site_disorder_group
N1 N 0.72605(13) 0.96938(7) 0.76975(8) 0.0180(2) Uani 1 1 d . . .
Sb1 Sb 0.693662(11) 1.088571(6) 0.782402(7) 0.02307(4) Uani 1 1 d . . .
Cl1 Cl 1.05393(4) 0.93652(3) 0.80548(3) 0.03273(10) Uani 1 1 d . . .
Cl2 Cl 0.69090(5) 1.13223(3) 0.63351(3) 0.03427(10) Uani 1 1 d . . .
Si1 Si 0.87331(4) 0.92484(3) 0.72490(3) 0.01995(9) Uani 1 1 d . . .
C1 C 0.61435(15) 0.91980(8) 0.80709(10) 0.0169(3) Uani 1 1 d . . .
C2 C 0.62003(15) 0.89558(9) 0.89604(10) 0.0193(3) Uani 1 1 d . . .
C3 C 0.52259(17) 0.83952(10) 0.92393(10) 0.0227(3) Uani 1 1 d . . .
H3 H 0.5296 0.8215 0.9825 0.027 Uiso 1 1 calc R . .
C4 C 0.41680(16) 0.80856(9) 0.87197(10) 0.0201(3) Uani 1 1 d . . .
C5 C 0.40705(16) 0.83714(9) 0.78783(10) 0.0212(3) Uani 1 1 d . . .
H5 H 0.3324 0.8184 0.7516 0.025 Uiso 1 1 calc R . .
C6 C 0.50090(16) 0.89215(9) 0.75281(10) 0.0183(3) Uani 1 1 d . . .
C7 C 0.72739(17) 0.92016(10) 0.96953(10) 0.0235(3) Uani 1 1 d . . .
C8 C 0.84091(19) 0.85589(12) 0.97706(13) 0.0352(4) Uani 1 1 d . . .
H8A H 0.8921 0.8519 0.9218 0.053 Uiso 1 1 calc R . .
H8B H 0.7957 0.8054 0.9900 0.053 Uiso 1 1 calc R . .
H8C H 0.9073 0.8693 1.0241 0.053 Uiso 1 1 calc R . .
C9 C 0.79801(18) 1.00024(11) 0.95851(11) 0.0282(4) Uani 1 1 d . . .
H9A H 0.7253 1.0409 0.9520 0.042 Uiso 1 1 calc R . .
H9B H 0.8576 0.9995 0.9064 0.042 Uiso 1 1 calc R . .
H9C H 0.8565 1.0117 1.0100 0.042 Uiso 1 1 calc R . .
C10 C 0.6516(2) 0.92668(14) 1.05872(12) 0.0396(5) Uani 1 1 d . . .
H10A H 0.7160 0.9503 1.1018 0.059 Uiso 1 1 calc R . .
H10B H 0.6237 0.8741 1.0784 0.059 Uiso 1 1 calc R . .
H10C H 0.5673 0.9597 1.0523 0.059 Uiso 1 1 calc R . .
C11 C 0.31432(17) 0.74669(9) 0.90792(11) 0.0252(3) Uani 1 1 d . . .
C12 C 0.3986(2) 0.67664(11) 0.94314(14) 0.0388(5) Uani 1 1 d . . .
H12A H 0.3332 0.6363 0.9642 0.058 Uiso 1 1 calc R . .
H12B H 0.4596 0.6941 0.9913 0.058 Uiso 1 1 calc R . .
H12C H 0.4569 0.6547 0.8964 0.058 Uiso 1 1 calc R . .
C13 C 0.2294(2) 0.78349(11) 0.98292(13) 0.0357(4) Uani 1 1 d . . .
H13A H 0.1762 0.8289 0.9609 0.054 Uiso 1 1 calc R . .
H13B H 0.2944 0.8006 1.0293 0.054 Uiso 1 1 calc R . .
H13C H 0.1635 0.7444 1.0063 0.054 Uiso 1 1 calc R . .
C14 C 0.2103(2) 0.71725(13) 0.83863(14) 0.0425(5) Uani 1 1 d . . .
H14A H 0.1513 0.7611 0.8184 0.064 Uiso 1 1 calc R . .
H14B H 0.1501 0.6763 0.8638 0.064 Uiso 1 1 calc R . .
H14C H 0.2628 0.6955 0.7893 0.064 Uiso 1 1 calc R . .
C15 C 0.46075(17) 0.92136(10) 0.65932(10) 0.0243(3) Uani 1 1 d . . .
C16 C 0.58385(19) 0.92972(11) 0.59561(11) 0.0284(4) Uani 1 1 d . . .
H16A H 0.5468 0.9403 0.5369 0.043 Uiso 1 1 calc R . .
H16B H 0.6388 0.8809 0.5950 0.043 Uiso 1 1 calc R . .
H16C H 0.6448 0.9733 0.6142 0.043 Uiso 1 1 calc R . .
C17 C 0.38350(19) 1.00027(12) 0.66872(13) 0.0347(4) Uani 1 1 d . . .
H17A H 0.4464 1.0385 0.6970 0.052 Uiso 1 1 calc R . .
H17B H 0.2988 0.9930 0.7044 0.052 Uiso 1 1 calc R . .
H17C H 0.3559 1.0197 0.6108 0.052 Uiso 1 1 calc R . .
C18 C 0.3559(2) 0.86511(15) 0.61379(13) 0.0475(6) Uani 1 1 d . . .
H18A H 0.2677 0.8632 0.6469 0.071 Uiso 1 1 calc R . .
H18B H 0.3972 0.8123 0.6110 0.071 Uiso 1 1 calc R . .
H18C H 0.3362 0.8840 0.5545 0.071 Uiso 1 1 calc R . .
C19 C 0.8495(2) 0.81720(10) 0.71665(12) 0.0296(4) Uani 1 1 d . . .
H19A H 0.8258 0.7959 0.7742 0.044 Uiso 1 1 calc R . .
H19B H 0.9372 0.7931 0.6961 0.044 Uiso 1 1 calc R . .
H19C H 0.7727 0.8056 0.6753 0.044 Uiso 1 1 calc R . .
C20 C 0.93752(19) 0.97182(11) 0.62353(11) 0.0283(3) Uani 1 1 d . . .
H20A H 0.8685 0.9634 0.5764 0.042 Uiso 1 1 calc R . .
H20B H 1.0283 0.9485 0.6072 0.042 Uiso 1 1 calc R . .
H20C H 0.9497 1.0284 0.6334 0.042 Uiso 1 1 calc R . .
C21 C 0.90685(18) 1.13112(10) 0.79688(12) 0.0285(4) Uani 1 1 d . . .
H21A H 0.9298 1.1367 0.8591 0.043 Uiso 1 1 calc R . .
H21B H 0.9155 1.1823 0.7681 0.043 Uiso 1 1 calc R . .
H21C H 0.9724 1.0937 0.7701 0.043 Uiso 1 1 calc R . .
 
loop_
 _atom_site_aniso_label
 _atom_site_aniso_U_11
 _atom_site_aniso_U_22
 _atom_site_aniso_U_33
 _atom_site_aniso_U_23
 _atom_site_aniso_U_13
 _atom_site_aniso_U_12
N1 0.0197(6) 0.0166(6) 0.0179(6) -0.0001(5) 0.0037(4) -0.0023(4)
Sb1 0.02825(6) 0.01885(6) 0.02219(6) -0.00092(4) 0.00481(4) 0.00093(4)
Cl1 0.02171(19) 0.0433(2) 0.0332(2) -0.00115(19) 0.00051(15) -0.00001(16)
Cl2 0.0489(3) 0.0265(2) 0.0274(2) 0.00717(16) 0.00037(18) -0.00123(18)
Si1 0.0200(2) 0.0191(2) 0.0208(2) 0.00014(16) 0.00392(15) -0.00064(15)
C1 0.0174(6) 0.0156(6) 0.0179(7) 0.0022(5) 0.0022(5) -0.0005(5)
C2 0.0181(7) 0.0230(7) 0.0168(7) 0.0014(5) -0.0005(5) 0.0010(5)
C3 0.0251(8) 0.0258(8) 0.0173(7) 0.0061(6) 0.0000(6) -0.0010(6)
C4 0.0212(7) 0.0169(7) 0.0222(7) 0.0042(6) 0.0036(5) -0.0003(5)
C5 0.0214(7) 0.0204(7) 0.0219(8) 0.0016(6) -0.0012(6) -0.0024(5)
C6 0.0205(7) 0.0186(7) 0.0158(7) 0.0027(5) -0.0005(5) -0.0010(5)
C7 0.0215(7) 0.0325(9) 0.0164(7) 0.0012(6) -0.0017(5) -0.0029(6)
C8 0.0299(9) 0.0393(10) 0.0364(10) 0.0081(8) -0.0107(7) 0.0022(8)
C9 0.0279(8) 0.0346(9) 0.0220(8) -0.0040(7) -0.0024(6) -0.0048(7)
C10 0.0377(10) 0.0623(13) 0.0190(8) -0.0025(8) 0.0005(7) -0.0127(9)
C11 0.0276(8) 0.0182(7) 0.0298(9) 0.0060(6) 0.0066(6) -0.0023(6)
C12 0.0453(11) 0.0223(8) 0.0491(12) 0.0135(8) 0.0123(9) 0.0039(7)
C13 0.0342(10) 0.0280(9) 0.0451(11) 0.0038(8) 0.0165(8) -0.0022(7)
C14 0.0463(11) 0.0380(11) 0.0433(12) 0.0070(9) -0.0003(9) -0.0227(9)
C15 0.0257(8) 0.0295(8) 0.0177(7) 0.0057(6) -0.0032(6) -0.0032(6)
C16 0.0341(9) 0.0339(9) 0.0172(8) 0.0038(6) 0.0001(6) 0.0015(7)
C17 0.0287(9) 0.0437(11) 0.0318(10) 0.0156(8) 0.0023(7) 0.0088(7)
C18 0.0544(13) 0.0629(14) 0.0250(10) 0.0091(9) -0.0146(9) -0.0279(11)
C19 0.0350(9) 0.0208(8) 0.0332(10) 0.0009(7) 0.0025(7) 0.0025(6)
C20 0.0300(8) 0.0286(9) 0.0263(8) 0.0003(7) 0.0087(6) -0.0028(7)
C21 0.0332(9) 0.0229(8) 0.0293(9) -0.0016(7) 0.0010(7) -0.0091(7)

#==============================================================================

# MOLECULAR GEOMETRY 
 
_geom_special_details
;
 All s.u.'s (except the s.u. in the dihedral angle between two l.s. planes)
 are estimated using the full covariance matrix.  The cell s.u.'s are taken
 into account individually in the estimation of s.u.'s in distances, angles
 and torsion angles; correlations between s.u.'s in cell parameters are only
 used when they are defined by crystal symmetry.  An approximate (isotropic)
 treatment of cell s.u.'s is used for estimating s.u.'s involving l.s. planes.
;
 
loop_
 _geom_bond_atom_site_label_1
 _geom_bond_atom_site_label_2
 _geom_bond_distance
 _geom_bond_site_symmetry_2
 _geom_bond_publ_flag
N1 C1 1.4704(19) . ?
N1 Si1 1.7316(13) . ?
N1 Sb1 2.0591(13) . ?
Sb1 C21 2.1522(17) . ?
Sb1 Cl2 2.3983(4) . ?
Cl1 Si1 2.1099(6) . ?
Si1 C19 1.8485(18) . ?
Si1 C20 1.8520(17) . ?
C1 C2 1.424(2) . ?
C1 C6 1.432(2) . ?
C2 C3 1.395(2) . ?
C2 C7 1.568(2) . ?
C3 C4 1.379(2) . ?
C3 H3 0.9500 . ?
C4 C5 1.380(2) . ?
C4 C11 1.535(2) . ?
C5 C6 1.399(2) . ?
C5 H5 0.9500 . ?
C6 C15 1.560(2) . ?
C7 C9 1.527(2) . ?
C7 C8 1.536(2) . ?
C7 C10 1.551(3) . ?
C8 H8A 0.9800 . ?
C8 H8B 0.9800 . ?
C8 H8C 0.9800 . ?
C9 H9A 0.9800 . ?
C9 H9B 0.9800 . ?
C9 H9C 0.9800 . ?
C10 H10A 0.9800 . ?
C10 H10B 0.9800 . ?
C10 H10C 0.9800 . ?
C11 C14 1.526(3) . ?
C11 C12 1.529(2) . ?
C11 C13 1.539(3) . ?
C12 H12A 0.9800 . ?
C12 H12B 0.9800 . ?
C12 H12C 0.9800 . ?
C13 H13A 0.9800 . ?
C13 H13B 0.9800 . ?
C13 H13C 0.9800 . ?
C14 H14A 0.9800 . ?
C14 H14B 0.9800 . ?
C14 H14C 0.9800 . ?
C15 C16 1.531(2) . ?
C15 C17 1.535(3) . ?
C15 C18 1.541(2) . ?
C16 H16A 0.9800 . ?
C16 H16B 0.9800 . ?
C16 H16C 0.9800 . ?
C17 H17A 0.9800 . ?
C17 H17B 0.9800 . ?
C17 H17C 0.9800 . ?
C18 H18A 0.9800 . ?
C18 H18B 0.9800 . ?
C18 H18C 0.9800 . ?
C19 H19A 0.9800 . ?
C19 H19B 0.9800 . ?
C19 H19C 0.9800 . ?
C20 H20A 0.9800 . ?
C20 H20B 0.9800 . ?
C20 H20C 0.9800 . ?
C21 H21A 0.9800 . ?
C21 H21B 0.9800 . ?
C21 H21C 0.9800 . ?
 
loop_
 _geom_angle_atom_site_label_1
 _geom_angle_atom_site_label_2
 _geom_angle_atom_site_label_3
 _geom_angle
 _geom_angle_site_symmetry_1
 _geom_angle_site_symmetry_3
 _geom_angle_publ_flag
C1 N1 Si1 119.04(10) . . ?
C1 N1 Sb1 114.84(9) . . ?
Si1 N1 Sb1 126.04(7) . . ?
N1 Sb1 C21 101.58(6) . . ?
N1 Sb1 Cl2 102.47(4) . . ?
C21 Sb1 Cl2 89.89(5) . . ?
N1 Si1 C19 111.23(8) . . ?
N1 Si1 C20 114.41(7) . . ?
C19 Si1 C20 114.23(8) . . ?
N1 Si1 Cl1 112.14(5) . . ?
C19 Si1 Cl1 103.36(6) . . ?
C20 Si1 Cl1 100.43(6) . . ?
C2 C1 C6 118.92(13) . . ?
C2 C1 N1 121.02(12) . . ?
C6 C1 N1 119.99(12) . . ?
C3 C2 C1 118.03(13) . . ?
C3 C2 C7 112.85(13) . . ?
C1 C2 C7 129.05(13) . . ?
C4 C3 C2 124.23(14) . . ?
C4 C3 H3 117.9 . . ?
C2 C3 H3 117.9 . . ?
C3 C4 C5 116.63(14) . . ?
C3 C4 C11 120.81(14) . . ?
C5 C4 C11 122.55(14) . . ?
C4 C5 C6 123.72(14) . . ?
C4 C5 H5 118.1 . . ?
C6 C5 H5 118.1 . . ?
C5 C6 C1 118.15(13) . . ?
C5 C6 C15 114.44(13) . . ?
C1 C6 C15 127.22(13) . . ?
C9 C7 C8 109.70(14) . . ?
C9 C7 C10 103.82(15) . . ?
C8 C7 C10 108.16(15) . . ?
C9 C7 C2 116.11(13) . . ?
C8 C7 C2 108.25(14) . . ?
C10 C7 C2 110.53(14) . . ?
C7 C8 H8A 109.5 . . ?
C7 C8 H8B 109.5 . . ?
H8A C8 H8B 109.5 . . ?
C7 C8 H8C 109.5 . . ?
H8A C8 H8C 109.5 . . ?
H8B C8 H8C 109.5 . . ?
C7 C9 H9A 109.5 . . ?
C7 C9 H9B 109.5 . . ?
H9A C9 H9B 109.5 . . ?
C7 C9 H9C 109.5 . . ?
H9A C9 H9C 109.5 . . ?
H9B C9 H9C 109.5 . . ?
C7 C10 H10A 109.5 . . ?
C7 C10 H10B 109.5 . . ?
H10A C10 H10B 109.5 . . ?
C7 C10 H10C 109.5 . . ?
H10A C10 H10C 109.5 . . ?
H10B C10 H10C 109.5 . . ?
C14 C11 C12 108.75(16) . . ?
C14 C11 C4 112.39(14) . . ?
C12 C11 C4 109.37(14) . . ?
C14 C11 C13 108.37(16) . . ?
C12 C11 C13 109.07(15) . . ?
C4 C11 C13 108.85(13) . . ?
C11 C12 H12A 109.5 . . ?
C11 C12 H12B 109.5 . . ?
H12A C12 H12B 109.5 . . ?
C11 C12 H12C 109.5 . . ?
H12A C12 H12C 109.5 . . ?
H12B C12 H12C 109.5 . . ?
C11 C13 H13A 109.5 . . ?
C11 C13 H13B 109.5 . . ?
H13A C13 H13B 109.5 . . ?
C11 C13 H13C 109.5 . . ?
H13A C13 H13C 109.5 . . ?
H13B C13 H13C 109.5 . . ?
C11 C14 H14A 109.5 . . ?
C11 C14 H14B 109.5 . . ?
H14A C14 H14B 109.5 . . ?
C11 C14 H14C 109.5 . . ?
H14A C14 H14C 109.5 . . ?
H14B C14 H14C 109.5 . . ?
C16 C15 C17 110.06(14) . . ?
C16 C15 C18 105.00(15) . . ?
C17 C15 C18 106.26(16) . . ?
C16 C15 C6 115.68(13) . . ?
C17 C15 C6 107.77(14) . . ?
C18 C15 C6 111.69(14) . . ?
C15 C16 H16A 109.5 . . ?
C15 C16 H16B 109.5 . . ?
H16A C16 H16B 109.5 . . ?
C15 C16 H16C 109.5 . . ?
H16A C16 H16C 109.5 . . ?
H16B C16 H16C 109.5 . . ?
C15 C17 H17A 109.5 . . ?
C15 C17 H17B 109.5 . . ?
H17A C17 H17B 109.5 . . ?
C15 C17 H17C 109.5 . . ?
H17A C17 H17C 109.5 . . ?
H17B C17 H17C 109.5 . . ?
C15 C18 H18A 109.5 . . ?
C15 C18 H18B 109.5 . . ?
H18A C18 H18B 109.5 . . ?
C15 C18 H18C 109.5 . . ?
H18A C18 H18C 109.5 . . ?
H18B C18 H18C 109.5 . . ?
Si1 C19 H19A 109.5 . . ?
Si1 C19 H19B 109.5 . . ?
H19A C19 H19B 109.5 . . ?
Si1 C19 H19C 109.5 . . ?
H19A C19 H19C 109.5 . . ?
H19B C19 H19C 109.5 . . ?
Si1 C20 H20A 109.5 . . ?
Si1 C20 H20B 109.5 . . ?
H20A C20 H20B 109.5 . . ?
Si1 C20 H20C 109.5 . . ?
H20A C20 H20C 109.5 . . ?
H20B C20 H20C 109.5 . . ?
Sb1 C21 H21A 109.5 . . ?
Sb1 C21 H21B 109.5 . . ?
H21A C21 H21B 109.5 . . ?
Sb1 C21 H21C 109.5 . . ?
H21A C21 H21C 109.5 . . ?
H21B C21 H21C 109.5 . . ?
 
loop_
 _geom_torsion_atom_site_label_1
 _geom_torsion_atom_site_label_2
 _geom_torsion_atom_site_label_3
 _geom_torsion_atom_site_label_4
 _geom_torsion
 _geom_torsion_site_symmetry_1
 _geom_torsion_site_symmetry_2
 _geom_torsion_site_symmetry_3
 _geom_torsion_site_symmetry_4
 _geom_torsion_publ_flag
C1 N1 Sb1 C21 146.74(10) . . . . ?
Si1 N1 Sb1 C21 -30.05(10) . . . . ?
C1 N1 Sb1 Cl2 -120.78(9) . . . . ?
Si1 N1 Sb1 Cl2 62.43(8) . . . . ?
C1 N1 Si1 C19 9.10(13) . . . . ?
Sb1 N1 Si1 C19 -174.23(8) . . . . ?
C1 N1 Si1 C20 140.38(11) . . . . ?
Sb1 N1 Si1 C20 -42.95(11) . . . . ?
C1 N1 Si1 Cl1 -106.09(10) . . . . ?
Sb1 N1 Si1 Cl1 70.58(8) . . . . ?
Si1 N1 C1 C2 88.30(15) . . . . ?
Sb1 N1 C1 C2 -88.73(14) . . . . ?
Si1 N1 C1 C6 -88.85(15) . . . . ?
Sb1 N1 C1 C6 94.12(14) . . . . ?
C6 C1 C2 C3 6.4(2) . . . . ?
N1 C1 C2 C3 -170.77(13) . . . . ?
C6 C1 C2 C7 -176.83(15) . . . . ?
N1 C1 C2 C7 6.0(2) . . . . ?
C1 C2 C3 C4 -3.1(2) . . . . ?
C7 C2 C3 C4 179.65(15) . . . . ?
C2 C3 C4 C5 -1.5(2) . . . . ?
C2 C3 C4 C11 179.73(15) . . . . ?
C3 C4 C5 C6 2.7(2) . . . . ?
C11 C4 C5 C6 -178.49(15) . . . . ?
C4 C5 C6 C1 0.6(2) . . . . ?
C4 C5 C6 C15 -174.71(15) . . . . ?
C2 C1 C6 C5 -5.3(2) . . . . ?
N1 C1 C6 C5 171.93(13) . . . . ?
C2 C1 C6 C15 169.39(15) . . . . ?
N1 C1 C6 C15 -13.4(2) . . . . ?
C3 C2 C7 C9 -157.23(15) . . . . ?
C1 C2 C7 C9 25.9(2) . . . . ?
C3 C2 C7 C8 78.93(17) . . . . ?
C1 C2 C7 C8 -97.96(19) . . . . ?
C3 C2 C7 C10 -39.4(2) . . . . ?
C1 C2 C7 C10 143.75(17) . . . . ?
C3 C4 C11 C14 -177.12(16) . . . . ?
C5 C4 C11 C14 4.2(2) . . . . ?
C3 C4 C11 C12 -56.2(2) . . . . ?
C5 C4 C11 C12 125.05(17) . . . . ?
C3 C4 C11 C13 62.8(2) . . . . ?
C5 C4 C11 C13 -115.88(17) . . . . ?
C5 C6 C15 C16 -138.50(15) . . . . ?
C1 C6 C15 C16 46.7(2) . . . . ?
C5 C6 C15 C17 97.87(17) . . . . ?
C1 C6 C15 C17 -76.97(19) . . . . ?
C5 C6 C15 C18 -18.5(2) . . . . ?
C1 C6 C15 C18 166.68(17) . . . . ?
 
_diffrn_measured_fraction_theta_max    0.998
_diffrn_reflns_theta_full              32.50
_diffrn_measured_fraction_theta_full   0.998
_refine_diff_density_max    0.805
_refine_diff_density_min   -0.435
_refine_diff_density_rms    0.080

#=============================================================================

data_av_ch05_ternsime2n3_sbmecl
 
_audit_author_name                'Villinger, A.' 
_audit_creation_method            SHELXL-97 

#==============================================================================

# CHEMICAL DATA

_chemical_name_systematic
;
N-azidodimethylsilyl-N-[2,6-bis(2,4,6-trimethylphenyl)phenyl]amino-chloro-
methylstibane
;
_chemical_name_common             ?
_chemical_melting_point           ?
_chemical_formula_moiety          'C27 H34 Cl N4 Sb Si'
_chemical_formula_sum
 'C27 H34 Cl N4 Sb Si'
_chemical_formula_weight          599.87
 
loop_
 _atom_type_symbol
 _atom_type_description
 _atom_type_scat_dispersion_real
 _atom_type_scat_dispersion_imag
 _atom_type_scat_source
 'C'  'C'   0.0033   0.0016
 'International Tables Vol C Tables 4.2.6.8 and 6.1.1.4'
 'H'  'H'   0.0000   0.0000
 'International Tables Vol C Tables 4.2.6.8 and 6.1.1.4'
 'N'  'N'   0.0061   0.0033
 'International Tables Vol C Tables 4.2.6.8 and 6.1.1.4'
 'Si'  'Si'   0.0817   0.0704
 'International Tables Vol C Tables 4.2.6.8 and 6.1.1.4'
 'Cl'  'Cl'   0.1484   0.1585
 'International Tables Vol C Tables 4.2.6.8 and 6.1.1.4'
 'Sb'  'Sb'  -0.5866   1.5461
 'International Tables Vol C Tables 4.2.6.8 and 6.1.1.4'
 
#==============================================================================

# CRYSTAL DATA
 
_symmetry_cell_setting            monoclinic
_symmetry_space_group_name_H-M    'P 21/n'
_symmetry_space_group_name_Hall   '-P 2yn'
_symmetry_Int_Tables_number       14
 
loop_
 _symmetry_equiv_pos_as_xyz
 'x, y, z'
 '-x+1/2, y+1/2, -z+1/2'
 '-x, -y, -z'
 'x-1/2, -y-1/2, z-1/2'
 
_cell_length_a                    10.7029(4)
_cell_length_b                    15.7205(6)
_cell_length_c                    16.4317(6)
_cell_angle_alpha                 90.00
_cell_angle_beta                  95.279(2)
_cell_angle_gamma                 90.00
_cell_volume                      2752.99(18)
_cell_formula_units_Z             4
_cell_measurement_temperature     173(2)
_cell_measurement_reflns_used     9885  
_cell_measurement_theta_min       4.979
_cell_measurement_theta_max       64.789
 
_exptl_crystal_description        block
_exptl_crystal_colour             colourless
_exptl_crystal_size_max           0.27
_exptl_crystal_size_mid           0.23
_exptl_crystal_size_min           0.09
_exptl_crystal_density_meas       ?
_exptl_crystal_density_diffrn     1.447
_exptl_crystal_density_method     'not measured'
_exptl_crystal_F_000              1224
_exptl_absorpt_coefficient_mu     1.165
_exptl_absorpt_correction_type    'multi-scan'
_exptl_absorpt_correction_T_min   0.7438
_exptl_absorpt_correction_T_max   0.9024
_exptl_absorpt_process_details    '(SADABS; Sheldrick, 2004)'

#==============================================================================

# EXPERIMENTAL DATA
 
_exptl_special_details
;
 ?
;
 
_diffrn_ambient_temperature       173(2)
_diffrn_radiation_wavelength      0.71073
_diffrn_radiation_type            MoK\a
_diffrn_radiation_source          'sealed tube'
_diffrn_radiation_monochromator   graphite
_diffrn_measurement_device_type   'Bruker Apex Kappa II-CCD-diffractometer'
_diffrn_measurement_method        'phi and psi scans'
_diffrn_detector_area_resol_mean  ?
_diffrn_standards_number          ?
_diffrn_standards_interval_count  ?
_diffrn_standards_interval_time   ?
_diffrn_standards_decay_%         ?
_diffrn_reflns_number             48565
_diffrn_reflns_av_R_equivalents   0.0294
_diffrn_reflns_av_sigmaI/netI     0.0245
_diffrn_reflns_limit_h_min        -16
_diffrn_reflns_limit_h_max        14
_diffrn_reflns_limit_k_min        -23
_diffrn_reflns_limit_k_max        23
_diffrn_reflns_limit_l_min        -24
_diffrn_reflns_limit_l_max        20
_diffrn_reflns_theta_min          2.31
_diffrn_reflns_theta_max          32.49
_reflns_number_total              9929
_reflns_number_gt                 8130
_reflns_threshold_expression      >2\s(I)
 
_computing_data_collection        'Bruker Apex v2.0-2'
_computing_cell_refinement        'Bruker Apex v2.0-2'
_computing_data_reduction         'Bruker SAINT'
_computing_structure_solution     'SHELXS-97 (Sheldrick, 1997)'
_computing_structure_refinement   'SHELXL-97 (Sheldrick, 1997)'
_computing_molecular_graphics     'ORTEP-3 (Farrugia, 1997)' 
_computing_publication_material   'SHELXL-97'

#==============================================================================

# REFINEMENT DATA 

_refine_special_details
;
 All H atoms  were positioned geometrically and refined using a 
 riding model , with C---H = 0.98 (methyl groups), 0.99\%A (methylene groups), 
 1.00\%A (methine groups) or 0.95 \%A (aryl CH) and with <i>U</i>~iso~(H) = 
 1.5 times <i>U</i>~eq~(C) (methyl groups) or with <i>U</i>~iso~(H) = 1.2 times 
 <i>U</i>~eq~(C) (methylene  groups, aryl CH, methine groups). Torsion angles 
 of all methyl groups were allowed to refine.
 
 Refinement of F^2^ against ALL reflections.  The weighted R-factor wR and
 goodness of fit S are based on F^2^, conventional R-factors R are based
 on F, with F set to zero for negative F^2^. The threshold expression of
 F^2^ > 2\s(F^2^) is used only for calculating R-factors(gt) etc. and is
 not relevant to the choice of reflections for refinement.  R-factors based
 on F^2^ are statistically about twice as large as those based on F, and R-
 factors based on ALL data will be even larger.
;
 
_refine_ls_structure_factor_coef  Fsqd
_refine_ls_matrix_type            full
_refine_ls_weighting_scheme       calc
_refine_ls_weighting_details
 'calc w=1/[\s^2^(Fo^2^)+(0.0379P)^2^+0.3470P] where P=(Fo^2^+2Fc^2^)/3'
_atom_sites_solution_primary      direct
_atom_sites_solution_secondary    difmap
_atom_sites_solution_hydrogens    geom
_refine_ls_hydrogen_treatment     constr
_refine_ls_extinction_method      none
_refine_ls_extinction_coef        ?
_refine_ls_number_reflns          9929
_refine_ls_number_parameters      316
_refine_ls_number_restraints      0
_refine_ls_R_factor_all           0.0374
_refine_ls_R_factor_gt            0.0259
_refine_ls_wR_factor_ref          0.0689
_refine_ls_wR_factor_gt           0.0656
_refine_ls_goodness_of_fit_ref    1.046
_refine_ls_restrained_S_all       1.046
_refine_ls_shift/su_max           0.003
_refine_ls_shift/su_mean          0.000

#==============================================================================

# ATOMIC COORDINATES AND DISPLACEMENT PARAMETERS
 
loop_
 _atom_site_label
 _atom_site_type_symbol
 _atom_site_fract_x
 _atom_site_fract_y
 _atom_site_fract_z
 _atom_site_U_iso_or_equiv
 _atom_site_adp_type
 _atom_site_occupancy
 _atom_site_symmetry_multiplicity
 _atom_site_calc_flag
 _atom_site_refinement_flags
 _atom_site_disorder_assembly
 _atom_site_disorder_group
Sb1 Sb 0.825159(9) 0.704917(6) 0.178339(6) 0.02238(3) Uani 1 1 d . . .
Cl1 Cl 0.96013(4) 0.77526(3) 0.28299(3) 0.03804(9) Uani 1 1 d . . .
Si1 Si 0.92121(4) 0.54080(3) 0.30180(2) 0.02156(8) Uani 1 1 d . . .
N1 N 0.80314(10) 0.59282(7) 0.24132(7) 0.0187(2) Uani 1 1 d . . .
N2 N 1.05714(12) 0.54863(10) 0.24785(9) 0.0309(3) Uani 1 1 d . . .
N3 N 1.14522(13) 0.59466(10) 0.27001(10) 0.0390(3) Uani 1 1 d . . .
N4 N 1.23116(16) 0.63483(14) 0.28723(16) 0.0679(6) Uani 1 1 d . . .
C1 C 0.67605(12) 0.56168(8) 0.23119(8) 0.0175(2) Uani 1 1 d . . .
C2 C 0.61605(12) 0.54862(9) 0.15179(8) 0.0206(2) Uani 1 1 d . . .
C3 C 0.49534(13) 0.51411(11) 0.14165(9) 0.0273(3) Uani 1 1 d . . .
H3 H 0.4566 0.5046 0.0881 0.033 Uiso 1 1 calc R . .
C4 C 0.43141(14) 0.49358(11) 0.20835(10) 0.0300(3) Uani 1 1 d . . .
H4 H 0.3504 0.4685 0.2010 0.036 Uiso 1 1 calc R . .
C5 C 0.48716(13) 0.51012(10) 0.28580(9) 0.0256(3) Uani 1 1 d . . .
H5 H 0.4421 0.4977 0.3316 0.031 Uiso 1 1 calc R . .
C6 C 0.60769(12) 0.54455(9) 0.29919(8) 0.0195(2) Uani 1 1 d . . .
C7 C 0.67236(12) 0.57559(9) 0.07541(8) 0.0209(2) Uani 1 1 d . . .
C8 C 0.76282(13) 0.52594(10) 0.04139(9) 0.0239(3) Uani 1 1 d . . .
C9 C 0.80966(14) 0.55264(11) -0.03123(9) 0.0268(3) Uani 1 1 d . . .
H9 H 0.8704 0.5186 -0.0545 0.032 Uiso 1 1 calc R . .
C10 C 0.77001(14) 0.62705(11) -0.06989(8) 0.0271(3) Uani 1 1 d . . .
C11 C 0.67691(15) 0.67401(11) -0.03725(9) 0.0283(3) Uani 1 1 d . . .
H11 H 0.6477 0.7248 -0.0640 0.034 Uiso 1 1 calc R . .
C12 C 0.62498(13) 0.64890(10) 0.03356(9) 0.0244(3) Uani 1 1 d . . .
C13 C 0.65129(12) 0.56691(9) 0.38574(8) 0.0198(2) Uani 1 1 d . . .
C14 C 0.66674(13) 0.50421(9) 0.44712(8) 0.0220(3) Uani 1 1 d . . .
C15 C 0.70288(13) 0.52877(10) 0.52776(9) 0.0251(3) Uani 1 1 d . . .
H15 H 0.7161 0.4861 0.5686 0.030 Uiso 1 1 calc R . .
C16 C 0.72003(13) 0.61324(11) 0.54982(8) 0.0257(3) Uani 1 1 d . . .
C17 C 0.69757(13) 0.67464(10) 0.48954(9) 0.0249(3) Uani 1 1 d . . .
H17 H 0.7061 0.7330 0.5041 0.030 Uiso 1 1 calc R . .
C18 C 0.66288(13) 0.65334(9) 0.40820(8) 0.0218(3) Uani 1 1 d . . .
C19 C 0.81024(18) 0.44471(11) 0.08138(11) 0.0364(4) Uani 1 1 d . . .
H19A H 0.8735 0.4579 0.1266 0.055 Uiso 1 1 calc R . .
H19B H 0.8479 0.4091 0.0412 0.055 Uiso 1 1 calc R . .
H19C H 0.7403 0.4141 0.1025 0.055 Uiso 1 1 calc R . .
C20 C 0.82616(18) 0.65768(14) -0.14533(10) 0.0401(4) Uani 1 1 d . . .
H20A H 0.7589 0.6755 -0.1863 0.060 Uiso 1 1 calc R . .
H20B H 0.8743 0.6115 -0.1676 0.060 Uiso 1 1 calc R . .
H20C H 0.8819 0.7060 -0.1312 0.060 Uiso 1 1 calc R . .
C21 C 0.51864(17) 0.70042(12) 0.06275(11) 0.0360(4) Uani 1 1 d . . .
H21A H 0.5182 0.7572 0.0382 0.054 Uiso 1 1 calc R . .
H21B H 0.5300 0.7055 0.1224 0.054 Uiso 1 1 calc R . .
H21C H 0.4387 0.6720 0.0466 0.054 Uiso 1 1 calc R . .
C22 C 0.64219(16) 0.41099(10) 0.43156(10) 0.0312(3) Uani 1 1 d . . .
H22A H 0.7092 0.3774 0.4607 0.047 Uiso 1 1 calc R . .
H22B H 0.6399 0.3996 0.3728 0.047 Uiso 1 1 calc R . .
H22C H 0.5614 0.3954 0.4510 0.047 Uiso 1 1 calc R . .
C23 C 0.75631(17) 0.63848(13) 0.63774(9) 0.0364(4) Uani 1 1 d . . .
H23A H 0.8110 0.6886 0.6392 0.055 Uiso 1 1 calc R . .
H23B H 0.8009 0.5913 0.6665 0.055 Uiso 1 1 calc R . .
H23C H 0.6805 0.6519 0.6644 0.055 Uiso 1 1 calc R . .
C24 C 0.63446(17) 0.72409(10) 0.34810(10) 0.0317(3) Uani 1 1 d . . .
H24A H 0.5937 0.7709 0.3748 0.048 Uiso 1 1 calc R . .
H24B H 0.5784 0.7031 0.3019 0.048 Uiso 1 1 calc R . .
H24C H 0.7127 0.7444 0.3283 0.048 Uiso 1 1 calc R . .
C25 C 0.98246(14) 0.67970(11) 0.10636(9) 0.0279(3) Uani 1 1 d . . .
H25A H 1.0595 0.7031 0.1346 0.042 Uiso 1 1 calc R . .
H25B H 0.9666 0.7065 0.0525 0.042 Uiso 1 1 calc R . .
H25C H 0.9919 0.6182 0.0996 0.042 Uiso 1 1 calc R . .
C26 C 0.88782(16) 0.42507(10) 0.30529(11) 0.0322(3) Uani 1 1 d . . .
H26A H 0.8012 0.4145 0.2829 0.048 Uiso 1 1 calc R . .
H26B H 0.8992 0.4053 0.3620 0.048 Uiso 1 1 calc R . .
H26C H 0.9455 0.3944 0.2727 0.048 Uiso 1 1 calc R . .
C27 C 0.97037(14) 0.58479(12) 0.40489(9) 0.0304(3) Uani 1 1 d . . .
H27A H 0.9873 0.6458 0.4004 0.046 Uiso 1 1 calc R . .
H27B H 1.0466 0.5557 0.4279 0.046 Uiso 1 1 calc R . .
H27C H 0.9032 0.5761 0.4407 0.046 Uiso 1 1 calc R . .
 
loop_
 _atom_site_aniso_label
 _atom_site_aniso_U_11
 _atom_site_aniso_U_22
 _atom_site_aniso_U_33
 _atom_site_aniso_U_23
 _atom_site_aniso_U_13
 _atom_site_aniso_U_12
Sb1 0.02610(5) 0.01766(5) 0.02275(5) 0.00304(3) -0.00121(3) -0.00307(3)
Cl1 0.0444(2) 0.0322(2) 0.0355(2) -0.00332(16) -0.00708(17) -0.01279(17)
Si1 0.02016(16) 0.02104(19) 0.02327(18) 0.00331(14) 0.00091(13) 0.00223(13)
N1 0.0183(5) 0.0179(5) 0.0197(5) 0.0016(4) 0.0008(4) -0.0006(4)
N2 0.0241(6) 0.0338(7) 0.0355(7) 0.0024(6) 0.0064(5) 0.0027(5)
N3 0.0246(6) 0.0353(8) 0.0580(10) 0.0035(7) 0.0088(6) 0.0048(6)
N4 0.0302(8) 0.0543(12) 0.1204(19) -0.0115(12) 0.0137(10) -0.0061(8)
C1 0.0187(5) 0.0152(6) 0.0187(5) -0.0010(4) 0.0014(4) 0.0000(4)
C2 0.0218(6) 0.0214(6) 0.0186(6) -0.0012(5) 0.0013(5) -0.0007(5)
C3 0.0256(6) 0.0345(8) 0.0212(6) -0.0042(6) -0.0014(5) -0.0058(6)
C4 0.0229(6) 0.0385(9) 0.0286(7) -0.0051(6) 0.0020(5) -0.0097(6)
C5 0.0250(6) 0.0291(8) 0.0235(6) -0.0034(6) 0.0065(5) -0.0057(5)
C6 0.0215(6) 0.0183(6) 0.0186(6) -0.0018(5) 0.0022(4) -0.0001(5)
C7 0.0220(6) 0.0236(7) 0.0168(5) -0.0016(5) 0.0000(4) -0.0012(5)
C8 0.0269(6) 0.0236(7) 0.0206(6) -0.0007(5) -0.0003(5) -0.0003(5)
C9 0.0266(6) 0.0331(8) 0.0210(6) -0.0034(6) 0.0039(5) -0.0021(6)
C10 0.0273(7) 0.0356(8) 0.0176(6) 0.0004(6) -0.0019(5) -0.0081(6)
C11 0.0324(7) 0.0301(8) 0.0212(6) 0.0039(6) -0.0045(5) -0.0013(6)
C12 0.0256(6) 0.0261(7) 0.0204(6) 0.0000(5) -0.0035(5) 0.0015(5)
C13 0.0197(5) 0.0214(6) 0.0187(6) -0.0021(5) 0.0035(4) 0.0000(5)
C14 0.0231(6) 0.0225(7) 0.0212(6) -0.0002(5) 0.0060(5) 0.0002(5)
C15 0.0258(6) 0.0310(8) 0.0189(6) 0.0029(5) 0.0044(5) 0.0030(5)
C16 0.0220(6) 0.0368(8) 0.0185(6) -0.0046(6) 0.0030(5) 0.0006(5)
C17 0.0256(6) 0.0257(7) 0.0239(6) -0.0068(6) 0.0046(5) -0.0003(5)
C18 0.0227(6) 0.0217(7) 0.0213(6) -0.0019(5) 0.0041(5) 0.0024(5)
C19 0.0480(10) 0.0292(9) 0.0332(8) 0.0032(7) 0.0101(7) 0.0126(7)
C20 0.0431(9) 0.0524(12) 0.0255(7) 0.0049(7) 0.0059(7) -0.0129(8)
C21 0.0353(8) 0.0374(10) 0.0346(8) 0.0027(7) 0.0001(7) 0.0140(7)
C22 0.0396(8) 0.0233(7) 0.0316(8) 0.0019(6) 0.0076(6) -0.0018(6)
C23 0.0391(9) 0.0499(11) 0.0197(7) -0.0062(7) -0.0005(6) -0.0021(8)
C24 0.0459(9) 0.0215(7) 0.0279(7) -0.0020(6) 0.0044(7) 0.0076(6)
C25 0.0282(7) 0.0298(8) 0.0261(7) 0.0025(6) 0.0048(5) -0.0095(6)
C26 0.0349(8) 0.0230(7) 0.0392(9) 0.0083(6) 0.0060(6) 0.0050(6)
C27 0.0245(6) 0.0400(9) 0.0255(7) 0.0018(6) -0.0037(5) 0.0019(6)

#==============================================================================

# MOLECULAR GEOMETRY 
 
_geom_special_details
;
 All s.u.'s (except the s.u. in the dihedral angle between two l.s. planes)
 are estimated using the full covariance matrix.  The cell s.u.'s are taken
 into account individually in the estimation of s.u.'s in distances, angles
 and torsion angles; correlations between s.u.'s in cell parameters are only
 used when they are defined by crystal symmetry.  An approximate (isotropic)
 treatment of cell s.u.'s is used for estimating s.u.'s involving l.s. planes.
;
 
loop_
 _geom_bond_atom_site_label_1
 _geom_bond_atom_site_label_2
 _geom_bond_distance
 _geom_bond_site_symmetry_2
 _geom_bond_publ_flag
Sb1 N1 2.0681(11) . ?
Sb1 C25 2.1810(15) . ?
Sb1 Cl1 2.4103(4) . ?
Si1 N1 1.7385(12) . ?
Si1 N2 1.7762(13) . ?
Si1 C26 1.8560(17) . ?
Si1 C27 1.8601(16) . ?
N1 C1 1.4408(16) . ?
N2 N3 1.217(2) . ?
N3 N4 1.130(2) . ?
C1 C2 1.4151(18) . ?
C1 C6 1.4166(18) . ?
C2 C3 1.3970(19) . ?
C2 C7 1.5025(18) . ?
C3 C4 1.383(2) . ?
C3 H3 0.9500 . ?
C4 C5 1.380(2) . ?
C4 H4 0.9500 . ?
C5 C6 1.3976(19) . ?
C5 H5 0.9500 . ?
C6 C13 1.4972(18) . ?
C7 C8 1.399(2) . ?
C7 C12 1.412(2) . ?
C8 C9 1.401(2) . ?
C8 C19 1.503(2) . ?
C9 C10 1.379(2) . ?
C9 H9 0.9500 . ?
C10 C11 1.387(2) . ?
C10 C20 1.506(2) . ?
C11 C12 1.392(2) . ?
C11 H11 0.9500 . ?
C12 C21 1.511(2) . ?
C13 C14 1.409(2) . ?
C13 C18 1.410(2) . ?
C14 C15 1.400(2) . ?
C14 C22 1.507(2) . ?
C15 C16 1.384(2) . ?
C15 H15 0.9500 . ?
C16 C17 1.388(2) . ?
C16 C23 1.514(2) . ?
C17 C18 1.3946(19) . ?
C17 H17 0.9500 . ?
C18 C24 1.500(2) . ?
C19 H19A 0.9800 . ?
C19 H19B 0.9800 . ?
C19 H19C 0.9800 . ?
C20 H20A 0.9800 . ?
C20 H20B 0.9800 . ?
C20 H20C 0.9800 . ?
C21 H21A 0.9800 . ?
C21 H21B 0.9800 . ?
C21 H21C 0.9800 . ?
C22 H22A 0.9800 . ?
C22 H22B 0.9800 . ?
C22 H22C 0.9800 . ?
C23 H23A 0.9800 . ?
C23 H23B 0.9800 . ?
C23 H23C 0.9800 . ?
C24 H24A 0.9800 . ?
C24 H24B 0.9800 . ?
C24 H24C 0.9800 . ?
C25 H25A 0.9800 . ?
C25 H25B 0.9800 . ?
C25 H25C 0.9800 . ?
C26 H26A 0.9800 . ?
C26 H26B 0.9800 . ?
C26 H26C 0.9800 . ?
C27 H27A 0.9800 . ?
C27 H27B 0.9800 . ?
C27 H27C 0.9800 . ?
 
loop_
 _geom_angle_atom_site_label_1
 _geom_angle_atom_site_label_2
 _geom_angle_atom_site_label_3
 _geom_angle
 _geom_angle_site_symmetry_1
 _geom_angle_site_symmetry_3
 _geom_angle_publ_flag
N1 Sb1 C25 104.22(5) . . ?
N1 Sb1 Cl1 97.03(3) . . ?
C25 Sb1 Cl1 91.63(4) . . ?
N1 Si1 N2 105.53(6) . . ?
N1 Si1 C26 110.29(7) . . ?
N2 Si1 C26 104.61(7) . . ?
N1 Si1 C27 118.39(7) . . ?
N2 Si1 C27 104.64(7) . . ?
C26 Si1 C27 112.06(8) . . ?
C1 N1 Si1 122.36(9) . . ?
C1 N1 Sb1 112.43(8) . . ?
Si1 N1 Sb1 125.21(6) . . ?
N3 N2 Si1 122.63(13) . . ?
N4 N3 N2 175.7(2) . . ?
C2 C1 C6 118.43(12) . . ?
C2 C1 N1 119.96(11) . . ?
C6 C1 N1 121.60(11) . . ?
C3 C2 C1 120.17(12) . . ?
C3 C2 C7 116.59(12) . . ?
C1 C2 C7 123.11(12) . . ?
C4 C3 C2 121.05(13) . . ?
C4 C3 H3 119.5 . . ?
C2 C3 H3 119.5 . . ?
C5 C4 C3 118.93(13) . . ?
C5 C4 H4 120.5 . . ?
C3 C4 H4 120.5 . . ?
C4 C5 C6 122.19(13) . . ?
C4 C5 H5 118.9 . . ?
C6 C5 H5 118.9 . . ?
C5 C6 C1 119.05(12) . . ?
C5 C6 C13 116.29(12) . . ?
C1 C6 C13 124.48(12) . . ?
C8 C7 C12 119.43(13) . . ?
C8 C7 C2 121.44(13) . . ?
C12 C7 C2 118.91(12) . . ?
C7 C8 C9 119.22(14) . . ?
C7 C8 C19 121.16(13) . . ?
C9 C8 C19 119.62(14) . . ?
C10 C9 C8 121.83(14) . . ?
C10 C9 H9 119.1 . . ?
C8 C9 H9 119.1 . . ?
C9 C10 C11 118.35(14) . . ?
C9 C10 C20 121.41(16) . . ?
C11 C10 C20 120.24(16) . . ?
C10 C11 C12 121.91(15) . . ?
C10 C11 H11 119.0 . . ?
C12 C11 H11 119.0 . . ?
C11 C12 C7 119.04(14) . . ?
C11 C12 C21 118.93(14) . . ?
C7 C12 C21 122.02(14) . . ?
C14 C13 C18 119.00(12) . . ?
C14 C13 C6 121.43(12) . . ?
C18 C13 C6 119.14(12) . . ?
C15 C14 C13 119.24(13) . . ?
C15 C14 C22 117.23(13) . . ?
C13 C14 C22 123.49(13) . . ?
C16 C15 C14 122.06(14) . . ?
C16 C15 H15 119.0 . . ?
C14 C15 H15 119.0 . . ?
C15 C16 C17 118.04(13) . . ?
C15 C16 C23 121.17(15) . . ?
C17 C16 C23 120.73(15) . . ?
C16 C17 C18 122.02(14) . . ?
C16 C17 H17 119.0 . . ?
C18 C17 H17 119.0 . . ?
C17 C18 C13 119.43(13) . . ?
C17 C18 C24 118.22(14) . . ?
C13 C18 C24 122.31(13) . . ?
C8 C19 H19A 109.5 . . ?
C8 C19 H19B 109.5 . . ?
H19A C19 H19B 109.5 . . ?
C8 C19 H19C 109.5 . . ?
H19A C19 H19C 109.5 . . ?
H19B C19 H19C 109.5 . . ?
C10 C20 H20A 109.5 . . ?
C10 C20 H20B 109.5 . . ?
H20A C20 H20B 109.5 . . ?
C10 C20 H20C 109.5 . . ?
H20A C20 H20C 109.5 . . ?
H20B C20 H20C 109.5 . . ?
C12 C21 H21A 109.5 . . ?
C12 C21 H21B 109.5 . . ?
H21A C21 H21B 109.5 . . ?
C12 C21 H21C 109.5 . . ?
H21A C21 H21C 109.5 . . ?
H21B C21 H21C 109.5 . . ?
C14 C22 H22A 109.5 . . ?
C14 C22 H22B 109.5 . . ?
H22A C22 H22B 109.5 . . ?
C14 C22 H22C 109.5 . . ?
H22A C22 H22C 109.5 . . ?
H22B C22 H22C 109.5 . . ?
C16 C23 H23A 109.5 . . ?
C16 C23 H23B 109.5 . . ?
H23A C23 H23B 109.5 . . ?
C16 C23 H23C 109.5 . . ?
H23A C23 H23C 109.5 . . ?
H23B C23 H23C 109.5 . . ?
C18 C24 H24A 109.5 . . ?
C18 C24 H24B 109.5 . . ?
H24A C24 H24B 109.5 . . ?
C18 C24 H24C 109.5 . . ?
H24A C24 H24C 109.5 . . ?
H24B C24 H24C 109.5 . . ?
Sb1 C25 H25A 109.5 . . ?
Sb1 C25 H25B 109.5 . . ?
H25A C25 H25B 109.5 . . ?
Sb1 C25 H25C 109.5 . . ?
H25A C25 H25C 109.5 . . ?
H25B C25 H25C 109.5 . . ?
Si1 C26 H26A 109.5 . . ?
Si1 C26 H26B 109.5 . . ?
H26A C26 H26B 109.5 . . ?
Si1 C26 H26C 109.5 . . ?
H26A C26 H26C 109.5 . . ?
H26B C26 H26C 109.5 . . ?
Si1 C27 H27A 109.5 . . ?
Si1 C27 H27B 109.5 . . ?
H27A C27 H27B 109.5 . . ?
Si1 C27 H27C 109.5 . . ?
H27A C27 H27C 109.5 . . ?
H27B C27 H27C 109.5 . . ?
 
loop_
 _geom_torsion_atom_site_label_1
 _geom_torsion_atom_site_label_2
 _geom_torsion_atom_site_label_3
 _geom_torsion_atom_site_label_4
 _geom_torsion
 _geom_torsion_site_symmetry_1
 _geom_torsion_site_symmetry_2
 _geom_torsion_site_symmetry_3
 _geom_torsion_site_symmetry_4
 _geom_torsion_publ_flag
N2 Si1 N1 C1 140.77(11) . . . . ?
C26 Si1 N1 C1 28.32(12) . . . . ?
C27 Si1 N1 C1 -102.59(12) . . . . ?
N2 Si1 N1 Sb1 -40.40(9) . . . . ?
C26 Si1 N1 Sb1 -152.85(8) . . . . ?
C27 Si1 N1 Sb1 76.24(10) . . . . ?
C25 Sb1 N1 C1 -127.83(9) . . . . ?
Cl1 Sb1 N1 C1 138.69(8) . . . . ?
C25 Sb1 N1 Si1 53.24(9) . . . . ?
Cl1 Sb1 N1 Si1 -40.24(7) . . . . ?
N1 Si1 N2 N3 107.89(15) . . . . ?
C26 Si1 N2 N3 -135.73(15) . . . . ?
C27 Si1 N2 N3 -17.75(16) . . . . ?
Si1 N2 N3 N4 167(3) . . . . ?
Si1 N1 C1 C2 -126.55(12) . . . . ?
Sb1 N1 C1 C2 54.48(14) . . . . ?
Si1 N1 C1 C6 54.31(16) . . . . ?
Sb1 N1 C1 C6 -124.66(11) . . . . ?
C6 C1 C2 C3 -4.3(2) . . . . ?
N1 C1 C2 C3 176.52(13) . . . . ?
C6 C1 C2 C7 171.47(13) . . . . ?
N1 C1 C2 C7 -7.7(2) . . . . ?
C1 C2 C3 C4 1.2(2) . . . . ?
C7 C2 C3 C4 -174.85(15) . . . . ?
C2 C3 C4 C5 2.0(3) . . . . ?
C3 C4 C5 C6 -2.0(3) . . . . ?
C4 C5 C6 C1 -1.2(2) . . . . ?
C4 C5 C6 C13 174.30(15) . . . . ?
C2 C1 C6 C5 4.3(2) . . . . ?
N1 C1 C6 C5 -176.58(13) . . . . ?
C2 C1 C6 C13 -170.81(13) . . . . ?
N1 C1 C6 C13 8.3(2) . . . . ?
C3 C2 C7 C8 -102.75(16) . . . . ?
C1 C2 C7 C8 81.33(18) . . . . ?
C3 C2 C7 C12 71.82(18) . . . . ?
C1 C2 C7 C12 -104.11(16) . . . . ?
C12 C7 C8 C9 3.6(2) . . . . ?
C2 C7 C8 C9 178.11(13) . . . . ?
C12 C7 C8 C19 -176.39(14) . . . . ?
C2 C7 C8 C19 -1.9(2) . . . . ?
C7 C8 C9 C10 0.6(2) . . . . ?
C19 C8 C9 C10 -179.41(15) . . . . ?
C8 C9 C10 C11 -3.0(2) . . . . ?
C8 C9 C10 C20 176.54(14) . . . . ?
C9 C10 C11 C12 1.2(2) . . . . ?
C20 C10 C11 C12 -178.35(15) . . . . ?
C10 C11 C12 C7 2.9(2) . . . . ?
C10 C11 C12 C21 -176.43(15) . . . . ?
C8 C7 C12 C11 -5.3(2) . . . . ?
C2 C7 C12 C11 -179.96(13) . . . . ?
C8 C7 C12 C21 174.04(14) . . . . ?
C2 C7 C12 C21 -0.6(2) . . . . ?
C5 C6 C13 C14 63.32(18) . . . . ?
C1 C6 C13 C14 -121.48(15) . . . . ?
C5 C6 C13 C18 -109.10(15) . . . . ?
C1 C6 C13 C18 66.10(18) . . . . ?
C18 C13 C14 C15 -5.0(2) . . . . ?
C6 C13 C14 C15 -177.46(12) . . . . ?
C18 C13 C14 C22 172.84(13) . . . . ?
C6 C13 C14 C22 0.4(2) . . . . ?
C13 C14 C15 C16 2.2(2) . . . . ?
C22 C14 C15 C16 -175.81(13) . . . . ?
C14 C15 C16 C17 1.4(2) . . . . ?
C14 C15 C16 C23 178.61(14) . . . . ?
C15 C16 C17 C18 -2.2(2) . . . . ?
C23 C16 C17 C18 -179.39(14) . . . . ?
C16 C17 C18 C13 -0.7(2) . . . . ?
C16 C17 C18 C24 177.07(14) . . . . ?
C14 C13 C18 C17 4.3(2) . . . . ?
C6 C13 C18 C17 176.91(12) . . . . ?
C14 C13 C18 C24 -173.36(13) . . . . ?
C6 C13 C18 C24 -0.7(2) . . . . ?
 
_diffrn_measured_fraction_theta_max    0.998
_diffrn_reflns_theta_full              32.49
_diffrn_measured_fraction_theta_full   0.998
_refine_diff_density_max    0.800
_refine_diff_density_min   -0.346
_refine_diff_density_rms    0.086

#=============================================================================

data_av_ml87_ternsime2otf_sbmecl
 
_audit_author_name                'Villinger, A.' 
_audit_creation_method            SHELXL-97 

#==============================================================================

# CHEMICAL DATA

_chemical_name_systematic
;
N-(trifluoromethylsulfonyl)dimethylsilyl-N-[2,6-bis(2,4,6-trimethylphenyl)
phenyl]amino-chloro-methylstibane 
;
_chemical_name_common             ?
_chemical_melting_point           ?
_chemical_formula_moiety          'C28 H34 Cl F3 N O3 S Sb Si'
_chemical_formula_sum
 'C28 H34 Cl F3 N O3 S Sb Si'
_chemical_formula_weight          706.91
 
loop_
 _atom_type_symbol
 _atom_type_description
 _atom_type_scat_dispersion_real
 _atom_type_scat_dispersion_imag
 _atom_type_scat_source
 'C'  'C'   0.0033   0.0016
 'International Tables Vol C Tables 4.2.6.8 and 6.1.1.4'
 'H'  'H'   0.0000   0.0000
 'International Tables Vol C Tables 4.2.6.8 and 6.1.1.4'
 'N'  'N'   0.0061   0.0033
 'International Tables Vol C Tables 4.2.6.8 and 6.1.1.4'
 'O'  'O'   0.0106   0.0060
 'International Tables Vol C Tables 4.2.6.8 and 6.1.1.4'
 'F'  'F'   0.0171   0.0103
 'International Tables Vol C Tables 4.2.6.8 and 6.1.1.4'
 'Si'  'Si'   0.0817   0.0704
 'International Tables Vol C Tables 4.2.6.8 and 6.1.1.4'
 'S'  'S'   0.1246   0.1234
 'International Tables Vol C Tables 4.2.6.8 and 6.1.1.4'
 'Cl'  'Cl'   0.1484   0.1585
 'International Tables Vol C Tables 4.2.6.8 and 6.1.1.4'
 'Sb'  'Sb'  -0.5866   1.5461
 'International Tables Vol C Tables 4.2.6.8 and 6.1.1.4'
 
#==============================================================================

# CRYSTAL DATA
 
_symmetry_cell_setting            monoclinic
_symmetry_space_group_name_H-M    'P 21/c'
_symmetry_space_group_name_Hall   '-P 2ybc'
_symmetry_Int_Tables_number       14
 
loop_
 _symmetry_equiv_pos_as_xyz
 'x, y, z'
 '-x, y+1/2, -z+1/2'
 '-x, -y, -z'
 'x, -y-1/2, z-1/2'
 
_cell_length_a                    21.987(9)
_cell_length_b                    9.225(4)
_cell_length_c                    16.128(8)
_cell_angle_alpha                 90.00
_cell_angle_beta                  109.841(13)
_cell_angle_gamma                 90.00
_cell_volume                      3077(2)
_cell_formula_units_Z             4
_cell_measurement_temperature     173(2)
_cell_measurement_reflns_used     9976
_cell_measurement_theta_min       4.837
_cell_measurement_theta_max       64.877
 
_exptl_crystal_description        block
_exptl_crystal_colour             colourless
_exptl_crystal_size_max           0.37
_exptl_crystal_size_mid           0.19
_exptl_crystal_size_min           0.15
_exptl_crystal_density_meas       ?
_exptl_crystal_density_diffrn     1.526
_exptl_crystal_density_method     'not measured'
_exptl_crystal_F_000              1432
_exptl_absorpt_coefficient_mu     1.138
_exptl_absorpt_correction_type    'multi-scan'
_exptl_absorpt_correction_T_min   0.6782
_exptl_absorpt_correction_T_max   0.8478
_exptl_absorpt_process_details    '(SADABS; Sheldrick, 2004)'

#==============================================================================

# EXPERIMENTAL DATA
 
_exptl_special_details
;
 ?
;
 
_diffrn_ambient_temperature       173(2)
_diffrn_radiation_wavelength      0.71073
_diffrn_radiation_type            MoK\a
_diffrn_radiation_source          'sealed tube'
_diffrn_radiation_monochromator   graphite
_diffrn_measurement_device_type   'Bruker Apex Kappa II-CCD-diffractometer'
_diffrn_measurement_method        'phi and psi scans'
_diffrn_detector_area_resol_mean  ?
_diffrn_standards_number          ?
_diffrn_standards_interval_count  ?
_diffrn_standards_interval_time   ?
_diffrn_standards_decay_%         ?
_diffrn_reflns_number             56598
_diffrn_reflns_av_R_equivalents   0.0436
_diffrn_reflns_av_sigmaI/netI     0.0364
_diffrn_reflns_limit_h_min        -33
_diffrn_reflns_limit_h_max        32
_diffrn_reflns_limit_k_min        -13
_diffrn_reflns_limit_k_max        13
_diffrn_reflns_limit_l_min        -21
_diffrn_reflns_limit_l_max        24
_diffrn_reflns_theta_min          2.42
_diffrn_reflns_theta_max          32.50
_reflns_number_total              11079
_reflns_number_gt                 8735
_reflns_threshold_expression      >2\s(I)
 
_computing_data_collection        'Bruker Apex v2.0-2'
_computing_cell_refinement        'Bruker Apex v2.0-2'
_computing_data_reduction         'Bruker SAINT'
_computing_structure_solution     'SHELXS-97 (Sheldrick, 1997)'
_computing_structure_refinement   'SHELXL-97 (Sheldrick, 1997)'
_computing_molecular_graphics     'ORTEP-3 (Farrugia, 1997)' 
_computing_publication_material   'SHELXL-97'

#==============================================================================

# REFINEMENT DATA 

_refine_special_details
;
 All H atoms  were positioned geometrically and refined using a 
 riding model , with C---H = 0.98 (methyl groups), 0.99\%A (methylene groups), 
 1.00\%A (methine groups) or 0.95 \%A (aryl CH) and with <i>U</i>~iso~(H) = 
 1.5 times <i>U</i>~eq~(C) (methyl groups) or with <i>U</i>~iso~(H) = 1.2 times 
 <i>U</i>~eq~(C) (methylene  groups, aryl CH, methine groups). Torsion angles 
 of all methyl groups were allowed to refine.
 
 Refinement of F^2^ against ALL reflections.  The weighted R-factor wR and
 goodness of fit S are based on F^2^, conventional R-factors R are based
 on F, with F set to zero for negative F^2^. The threshold expression of
 F^2^ > 2\s(F^2^) is used only for calculating R-factors(gt) etc. and is
 not relevant to the choice of reflections for refinement.  R-factors based
 on F^2^ are statistically about twice as large as those based on F, and R-
 factors based on ALL data will be even larger.
;
 
_refine_ls_structure_factor_coef  Fsqd
_refine_ls_matrix_type            full
_refine_ls_weighting_scheme       calc
_refine_ls_weighting_details
 'calc w=1/[\s^2^(Fo^2^)+(0.0565P)^2^+0.9043P] where P=(Fo^2^+2Fc^2^)/3'
_atom_sites_solution_primary      direct
_atom_sites_solution_secondary    difmap
_atom_sites_solution_hydrogens    geom
_refine_ls_hydrogen_treatment     constr
_refine_ls_extinction_method      none
_refine_ls_extinction_coef        ?
_refine_ls_number_reflns          11079
_refine_ls_number_parameters      361
_refine_ls_number_restraints      0
_refine_ls_R_factor_all           0.0556
_refine_ls_R_factor_gt            0.0395
_refine_ls_wR_factor_ref          0.1039
_refine_ls_wR_factor_gt           0.0986
_refine_ls_goodness_of_fit_ref    1.058
_refine_ls_restrained_S_all       1.058
_refine_ls_shift/su_max           0.001
_refine_ls_shift/su_mean          0.000

#==============================================================================

# ATOMIC COORDINATES AND DISPLACEMENT PARAMETERS
 
loop_
 _atom_site_label
 _atom_site_type_symbol
 _atom_site_fract_x
 _atom_site_fract_y
 _atom_site_fract_z
 _atom_site_U_iso_or_equiv
 _atom_site_adp_type
 _atom_site_occupancy
 _atom_site_symmetry_multiplicity
 _atom_site_calc_flag
 _atom_site_refinement_flags
 _atom_site_disorder_assembly
 _atom_site_disorder_group
Sb1 Sb 0.215165(7) 0.149848(15) 1.028037(9) 0.02253(5) Uani 1 1 d . . .
Cl1 Cl 0.20917(4) 0.40388(7) 0.99396(5) 0.04044(15) Uani 1 1 d . . .
N1 N 0.25548(8) 0.08556(19) 0.93270(11) 0.0203(3) Uani 1 1 d . . .
O1 O 0.15083(8) 0.16700(19) 0.79907(11) 0.0287(3) Uani 1 1 d . . .
O2 O 0.12491(11) 0.2336(3) 0.64531(14) 0.0612(7) Uani 1 1 d . . .
O3 O 0.04874(11) 0.0941(3) 0.69364(18) 0.0608(7) Uani 1 1 d . . .
F1 F 0.10753(13) 0.4638(3) 0.7627(2) 0.1091(12) Uani 1 1 d . . .
F2 F 0.03780(18) 0.3420(4) 0.7958(2) 0.1151(14) Uani 1 1 d . . .
F3 F 0.01874(10) 0.4114(2) 0.66451(16) 0.0713(7) Uani 1 1 d . . .
Si1 Si 0.23481(3) 0.15475(7) 0.82758(4) 0.02205(11) Uani 1 1 d . . .
S1 S 0.09830(3) 0.19798(8) 0.71073(4) 0.03286(13) Uani 1 1 d . . .
C1 C 0.30452(9) -0.0228(2) 0.96661(13) 0.0201(4) Uani 1 1 d . . .
C2 C 0.36827(10) -0.0044(2) 0.96465(15) 0.0251(4) Uani 1 1 d . . .
C3 C 0.41425(11) -0.1135(3) 0.99996(19) 0.0345(5) Uani 1 1 d . . .
H3 H 0.4569 -0.1012 0.9989 0.041 Uiso 1 1 calc R . .
C4 C 0.39923(12) -0.2385(3) 1.0363(2) 0.0396(6) Uani 1 1 d . . .
H4 H 0.4311 -0.3113 1.0594 0.048 Uiso 1 1 calc R . .
C5 C 0.33739(11) -0.2567(3) 1.03853(18) 0.0319(5) Uani 1 1 d . . .
H5 H 0.3269 -0.3429 1.0629 0.038 Uiso 1 1 calc R . .
C6 C 0.29022(10) -0.1504(2) 1.00567(15) 0.0230(4) Uani 1 1 d . . .
C7 C 0.39020(10) 0.1269(3) 0.92867(15) 0.0257(4) Uani 1 1 d . . .
C8 C 0.39778(10) 0.2594(3) 0.97387(16) 0.0286(4) Uani 1 1 d . . .
C9 C 0.41957(12) 0.3806(3) 0.94035(19) 0.0355(5) Uani 1 1 d . . .
H9 H 0.4247 0.4698 0.9715 0.043 Uiso 1 1 calc R . .
C10 C 0.43392(12) 0.3750(3) 0.86316(19) 0.0384(6) Uani 1 1 d . . .
C11 C 0.42985(12) 0.2416(4) 0.82237(18) 0.0398(6) Uani 1 1 d . . .
H11 H 0.4414 0.2350 0.7708 0.048 Uiso 1 1 calc R . .
C12 C 0.40955(12) 0.1164(3) 0.85387(18) 0.0344(5) Uani 1 1 d . . .
C13 C 0.22662(10) -0.1785(2) 1.01724(14) 0.0219(4) Uani 1 1 d . . .
C14 C 0.22313(11) -0.1772(2) 1.10332(15) 0.0253(4) Uani 1 1 d . . .
C15 C 0.16467(12) -0.2113(3) 1.11437(17) 0.0334(5) Uani 1 1 d . . .
H15 H 0.1617 -0.2055 1.1717 0.040 Uiso 1 1 calc R . .
C16 C 0.11068(12) -0.2532(3) 1.04467(19) 0.0347(5) Uani 1 1 d . . .
C17 C 0.11554(11) -0.2602(3) 0.96120(18) 0.0311(5) Uani 1 1 d . . .
H17 H 0.0793 -0.2915 0.9130 0.037 Uiso 1 1 calc R . .
C18 C 0.17225(10) -0.2225(2) 0.94649(15) 0.0246(4) Uani 1 1 d . . .
C19 C 0.38471(14) 0.2732(3) 1.05909(19) 0.0406(6) Uani 1 1 d . . .
H19A H 0.4195 0.3291 1.1013 0.061 Uiso 1 1 calc R . .
H19B H 0.3827 0.1765 1.0832 0.061 Uiso 1 1 calc R . .
H19C H 0.3434 0.3231 1.0484 0.061 Uiso 1 1 calc R . .
C20 C 0.45386(15) 0.5089(4) 0.8251(2) 0.0563(9) Uani 1 1 d . . .
H20A H 0.4895 0.4850 0.8040 0.084 Uiso 1 1 calc R . .
H20B H 0.4679 0.5839 0.8707 0.084 Uiso 1 1 calc R . .
H20C H 0.4171 0.5449 0.7758 0.084 Uiso 1 1 calc R . .
C21 C 0.41231(15) -0.0254(4) 0.8091(2) 0.0481(7) Uani 1 1 d . . .
H21A H 0.3995 -0.0100 0.7453 0.072 Uiso 1 1 calc R . .
H21B H 0.3828 -0.0949 0.8214 0.072 Uiso 1 1 calc R . .
H21C H 0.4565 -0.0636 0.8313 0.072 Uiso 1 1 calc R . .
C22 C 0.28177(13) -0.1459(3) 1.18287(16) 0.0337(5) Uani 1 1 d . . .
H22A H 0.2686 -0.1332 1.2347 0.051 Uiso 1 1 calc R . .
H22B H 0.3027 -0.0572 1.1728 0.051 Uiso 1 1 calc R . .
H22C H 0.3122 -0.2271 1.1929 0.051 Uiso 1 1 calc R . .
C23 C 0.04773(15) -0.2903(5) 1.0583(3) 0.0590(10) Uani 1 1 d . . .
H23A H 0.0568 -0.3290 1.1179 0.089 Uiso 1 1 calc R . .
H23B H 0.0244 -0.3631 1.0149 0.089 Uiso 1 1 calc R . .
H23C H 0.0212 -0.2027 1.0510 0.089 Uiso 1 1 calc R . .
C24 C 0.17443(13) -0.2335(3) 0.85435(17) 0.0362(5) Uani 1 1 d . . .
H24A H 0.1310 -0.2546 0.8131 0.054 Uiso 1 1 calc R . .
H24B H 0.2040 -0.3116 0.8519 0.054 Uiso 1 1 calc R . .
H24C H 0.1897 -0.1415 0.8381 0.054 Uiso 1 1 calc R . .
C25 C 0.11402(11) 0.1169(3) 0.96267(17) 0.0322(5) Uani 1 1 d . . .
H25A H 0.0923 0.2110 0.9483 0.048 Uiso 1 1 calc R . .
H25B H 0.0962 0.0627 1.0014 0.048 Uiso 1 1 calc R . .
H25C H 0.1072 0.0618 0.9083 0.048 Uiso 1 1 calc R . .
C26 C 0.24964(13) 0.0263(3) 0.74952(17) 0.0343(5) Uani 1 1 d . . .
H26A H 0.2740 -0.0571 0.7819 0.051 Uiso 1 1 calc R . .
H26B H 0.2746 0.0742 0.7173 0.051 Uiso 1 1 calc R . .
H26C H 0.2082 -0.0069 0.7077 0.051 Uiso 1 1 calc R . .
C27 C 0.25827(12) 0.3410(3) 0.81051(17) 0.0318(5) Uani 1 1 d . . .
H27A H 0.2548 0.4036 0.8578 0.048 Uiso 1 1 calc R . .
H27B H 0.2295 0.3772 0.7536 0.048 Uiso 1 1 calc R . .
H27C H 0.3030 0.3415 0.8111 0.048 Uiso 1 1 calc R . .
C28 C 0.06355(16) 0.3641(4) 0.7370(2) 0.0510(8) Uani 1 1 d . . .
 
loop_
 _atom_site_aniso_label
 _atom_site_aniso_U_11
 _atom_site_aniso_U_22
 _atom_site_aniso_U_33
 _atom_site_aniso_U_23
 _atom_site_aniso_U_13
 _atom_site_aniso_U_12
Sb1 0.02603(7) 0.02323(7) 0.01978(7) 0.00090(5) 0.00967(5) 0.00437(5)
Cl1 0.0587(4) 0.0227(3) 0.0463(4) 0.0000(2) 0.0262(3) 0.0056(3)
N1 0.0202(7) 0.0222(8) 0.0196(8) 0.0007(6) 0.0083(6) 0.0008(6)
O1 0.0215(7) 0.0404(10) 0.0220(7) 0.0066(6) 0.0045(6) 0.0024(6)
O2 0.0501(13) 0.103(2) 0.0293(10) 0.0208(12) 0.0120(9) 0.0145(13)
O3 0.0411(11) 0.0442(13) 0.0731(17) 0.0032(12) -0.0119(11) -0.0109(10)
F1 0.0774(17) 0.0426(13) 0.151(3) -0.0231(15) -0.0352(17) 0.0020(12)
F2 0.146(3) 0.130(3) 0.096(2) 0.0464(19) 0.075(2) 0.101(2)
F3 0.0575(12) 0.0552(13) 0.0714(14) 0.0150(11) -0.0169(10) 0.0174(10)
Si1 0.0217(2) 0.0259(3) 0.0188(2) 0.0020(2) 0.0071(2) -0.0012(2)
S1 0.0266(3) 0.0381(3) 0.0273(3) 0.0027(2) 0.0005(2) -0.0012(2)
C1 0.0177(8) 0.0227(9) 0.0198(9) -0.0030(7) 0.0061(7) -0.0003(7)
C2 0.0201(9) 0.0263(10) 0.0301(11) -0.0041(8) 0.0101(8) -0.0015(7)
C3 0.0192(9) 0.0341(12) 0.0502(15) -0.0012(11) 0.0119(10) 0.0033(8)
C4 0.0254(11) 0.0333(13) 0.0585(18) 0.0033(12) 0.0120(11) 0.0094(9)
C5 0.0276(10) 0.0229(10) 0.0454(14) 0.0029(9) 0.0125(10) 0.0033(8)
C6 0.0187(8) 0.0229(9) 0.0281(10) -0.0021(8) 0.0086(7) 0.0005(7)
C7 0.0172(8) 0.0326(11) 0.0283(10) -0.0023(8) 0.0090(7) -0.0037(7)
C8 0.0213(9) 0.0329(11) 0.0304(11) -0.0044(9) 0.0073(8) -0.0067(8)
C9 0.0272(11) 0.0338(12) 0.0417(14) -0.0020(10) 0.0068(10) -0.0095(9)
C10 0.0222(10) 0.0478(15) 0.0405(14) 0.0113(12) 0.0045(9) -0.0098(10)
C11 0.0271(11) 0.0632(19) 0.0324(13) 0.0024(12) 0.0146(10) -0.0092(11)
C12 0.0235(10) 0.0471(14) 0.0355(13) -0.0073(11) 0.0139(9) -0.0059(9)
C13 0.0201(8) 0.0216(9) 0.0243(10) 0.0022(7) 0.0081(7) 0.0023(7)
C14 0.0276(10) 0.0268(10) 0.0213(9) 0.0060(8) 0.0079(8) 0.0050(8)
C15 0.0371(12) 0.0372(13) 0.0317(12) 0.0123(10) 0.0192(10) 0.0078(10)
C16 0.0285(11) 0.0363(13) 0.0445(14) 0.0149(11) 0.0192(10) 0.0039(9)
C17 0.0233(10) 0.0285(11) 0.0392(13) 0.0050(9) 0.0075(9) -0.0035(8)
C18 0.0254(9) 0.0232(10) 0.0250(10) 0.0001(8) 0.0082(8) -0.0018(7)
C19 0.0424(14) 0.0451(15) 0.0373(14) -0.0172(12) 0.0175(11) -0.0168(12)
C20 0.0374(15) 0.063(2) 0.062(2) 0.0214(17) 0.0084(14) -0.0167(14)
C21 0.0421(15) 0.0586(19) 0.0534(18) -0.0196(15) 0.0290(14) -0.0074(13)
C22 0.0395(12) 0.0327(12) 0.0225(10) 0.0041(9) 0.0020(9) 0.0043(10)
C23 0.0359(15) 0.079(3) 0.072(2) 0.023(2) 0.0309(16) -0.0011(16)
C24 0.0408(13) 0.0401(14) 0.0266(11) -0.0086(10) 0.0101(10) -0.0105(11)
C25 0.0259(10) 0.0382(13) 0.0362(12) 0.0013(10) 0.0155(9) 0.0059(9)
C26 0.0342(12) 0.0406(14) 0.0319(12) -0.0032(10) 0.0162(10) -0.0018(10)
C27 0.0313(11) 0.0324(12) 0.0304(11) 0.0078(9) 0.0086(9) -0.0058(9)
C28 0.0451(16) 0.0420(16) 0.0509(18) 0.0057(13) -0.0033(14) 0.0108(13)

#==============================================================================

# MOLECULAR GEOMETRY 
 
_geom_special_details
;
 All s.u.'s (except the s.u. in the dihedral angle between two l.s. planes)
 are estimated using the full covariance matrix.  The cell s.u.'s are taken
 into account individually in the estimation of s.u.'s in distances, angles
 and torsion angles; correlations between s.u.'s in cell parameters are only
 used when they are defined by crystal symmetry.  An approximate (isotropic)
 treatment of cell s.u.'s is used for estimating s.u.'s involving l.s. planes.
;
 
loop_
 _geom_bond_atom_site_label_1
 _geom_bond_atom_site_label_2
 _geom_bond_distance
 _geom_bond_site_symmetry_2
 _geom_bond_publ_flag
Sb1 N1 2.1040(18) . ?
Sb1 C25 2.135(3) . ?
Sb1 Cl1 2.4004(12) . ?
N1 C1 1.436(3) . ?
N1 Si1 1.722(2) . ?
O1 S1 1.5260(18) . ?
O1 Si1 1.7486(19) . ?
O2 S1 1.408(2) . ?
O3 S1 1.406(2) . ?
F1 C28 1.296(4) . ?
F2 C28 1.276(5) . ?
F3 C28 1.321(4) . ?
Si1 C26 1.837(3) . ?
Si1 C27 1.842(2) . ?
S1 C28 1.825(4) . ?
C1 C6 1.419(3) . ?
C1 C2 1.423(3) . ?
C2 C3 1.403(3) . ?
C2 C7 1.492(3) . ?
C3 C4 1.383(4) . ?
C3 H3 0.9500 . ?
C4 C5 1.383(4) . ?
C4 H4 0.9500 . ?
C5 C6 1.395(3) . ?
C5 H5 0.9500 . ?
C6 C13 1.495(3) . ?
C7 C8 1.404(3) . ?
C7 C12 1.412(3) . ?
C8 C9 1.396(4) . ?
C8 C19 1.502(4) . ?
C9 C10 1.385(4) . ?
C9 H9 0.9500 . ?
C10 C11 1.384(5) . ?
C10 C20 1.510(4) . ?
C11 C12 1.395(4) . ?
C11 H11 0.9500 . ?
C12 C21 1.506(4) . ?
C13 C18 1.404(3) . ?
C13 C14 1.416(3) . ?
C14 C15 1.392(3) . ?
C14 C22 1.506(3) . ?
C15 C16 1.384(4) . ?
C15 H15 0.9500 . ?
C16 C17 1.388(4) . ?
C16 C23 1.513(4) . ?
C17 C18 1.390(3) . ?
C17 H17 0.9500 . ?
C18 C24 1.506(3) . ?
C19 H19A 0.9800 . ?
C19 H19B 0.9800 . ?
C19 H19C 0.9800 . ?
C20 H20A 0.9800 . ?
C20 H20B 0.9800 . ?
C20 H20C 0.9800 . ?
C21 H21A 0.9800 . ?
C21 H21B 0.9800 . ?
C21 H21C 0.9800 . ?
C22 H22A 0.9800 . ?
C22 H22B 0.9800 . ?
C22 H22C 0.9800 . ?
C23 H23A 0.9800 . ?
C23 H23B 0.9800 . ?
C23 H23C 0.9800 . ?
C24 H24A 0.9800 . ?
C24 H24B 0.9800 . ?
C24 H24C 0.9800 . ?
C25 H25A 0.9800 . ?
C25 H25B 0.9800 . ?
C25 H25C 0.9800 . ?
C26 H26A 0.9800 . ?
C26 H26B 0.9800 . ?
C26 H26C 0.9800 . ?
C27 H27A 0.9800 . ?
C27 H27B 0.9800 . ?
C27 H27C 0.9800 . ?
 
loop_
 _geom_angle_atom_site_label_1
 _geom_angle_atom_site_label_2
 _geom_angle_atom_site_label_3
 _geom_angle
 _geom_angle_site_symmetry_1
 _geom_angle_site_symmetry_3
 _geom_angle_publ_flag
N1 Sb1 C25 103.03(9) . . ?
N1 Sb1 Cl1 96.42(5) . . ?
C25 Sb1 Cl1 93.38(8) . . ?
C1 N1 Si1 123.11(14) . . ?
C1 N1 Sb1 111.47(13) . . ?
Si1 N1 Sb1 125.40(10) . . ?
S1 O1 Si1 130.90(11) . . ?
N1 Si1 O1 100.66(8) . . ?
N1 Si1 C26 112.75(12) . . ?
O1 Si1 C26 106.18(11) . . ?
N1 Si1 C27 119.96(11) . . ?
O1 Si1 C27 102.98(10) . . ?
C26 Si1 C27 112.07(13) . . ?
O3 S1 O2 120.22(18) . . ?
O3 S1 O1 110.24(13) . . ?
O2 S1 O1 111.59(12) . . ?
O3 S1 C28 105.08(17) . . ?
O2 S1 C28 106.92(19) . . ?
O1 S1 C28 100.63(13) . . ?
C6 C1 C2 118.51(19) . . ?
C6 C1 N1 119.71(18) . . ?
C2 C1 N1 121.76(19) . . ?
C3 C2 C1 119.0(2) . . ?
C3 C2 C7 117.2(2) . . ?
C1 C2 C7 123.8(2) . . ?
C4 C3 C2 121.8(2) . . ?
C4 C3 H3 119.1 . . ?
C2 C3 H3 119.1 . . ?
C5 C4 C3 119.4(2) . . ?
C5 C4 H4 120.3 . . ?
C3 C4 H4 120.3 . . ?
C4 C5 C6 121.1(2) . . ?
C4 C5 H5 119.5 . . ?
C6 C5 H5 119.5 . . ?
C5 C6 C1 120.2(2) . . ?
C5 C6 C13 115.9(2) . . ?
C1 C6 C13 123.83(18) . . ?
C8 C7 C12 119.1(2) . . ?
C8 C7 C2 120.1(2) . . ?
C12 C7 C2 120.5(2) . . ?
C9 C8 C7 119.5(2) . . ?
C9 C8 C19 118.9(2) . . ?
C7 C8 C19 121.6(2) . . ?
C10 C9 C8 122.1(3) . . ?
C10 C9 H9 119.0 . . ?
C8 C9 H9 119.0 . . ?
C11 C10 C9 117.6(2) . . ?
C11 C10 C20 121.0(3) . . ?
C9 C10 C20 121.4(3) . . ?
C10 C11 C12 122.7(3) . . ?
C10 C11 H11 118.7 . . ?
C12 C11 H11 118.7 . . ?
C11 C12 C7 118.7(3) . . ?
C11 C12 C21 118.3(3) . . ?
C7 C12 C21 122.9(3) . . ?
C18 C13 C14 119.0(2) . . ?
C18 C13 C6 121.6(2) . . ?
C14 C13 C6 119.03(19) . . ?
C15 C14 C13 118.9(2) . . ?
C15 C14 C22 119.6(2) . . ?
C13 C14 C22 121.4(2) . . ?
C16 C15 C14 122.2(2) . . ?
C16 C15 H15 118.9 . . ?
C14 C15 H15 118.9 . . ?
C15 C16 C17 118.3(2) . . ?
C15 C16 C23 121.3(3) . . ?
C17 C16 C23 120.4(3) . . ?
C16 C17 C18 121.5(2) . . ?
C16 C17 H17 119.2 . . ?
C18 C17 H17 119.2 . . ?
C17 C18 C13 120.0(2) . . ?
C17 C18 C24 118.8(2) . . ?
C13 C18 C24 121.2(2) . . ?
C8 C19 H19A 109.5 . . ?
C8 C19 H19B 109.5 . . ?
H19A C19 H19B 109.5 . . ?
C8 C19 H19C 109.5 . . ?
H19A C19 H19C 109.5 . . ?
H19B C19 H19C 109.5 . . ?
C10 C20 H20A 109.5 . . ?
C10 C20 H20B 109.5 . . ?
H20A C20 H20B 109.5 . . ?
C10 C20 H20C 109.5 . . ?
H20A C20 H20C 109.5 . . ?
H20B C20 H20C 109.5 . . ?
C12 C21 H21A 109.5 . . ?
C12 C21 H21B 109.5 . . ?
H21A C21 H21B 109.5 . . ?
C12 C21 H21C 109.5 . . ?
H21A C21 H21C 109.5 . . ?
H21B C21 H21C 109.5 . . ?
C14 C22 H22A 109.5 . . ?
C14 C22 H22B 109.5 . . ?
H22A C22 H22B 109.5 . . ?
C14 C22 H22C 109.5 . . ?
H22A C22 H22C 109.5 . . ?
H22B C22 H22C 109.5 . . ?
C16 C23 H23A 109.5 . . ?
C16 C23 H23B 109.5 . . ?
H23A C23 H23B 109.5 . . ?
C16 C23 H23C 109.5 . . ?
H23A C23 H23C 109.5 . . ?
H23B C23 H23C 109.5 . . ?
C18 C24 H24A 109.5 . . ?
C18 C24 H24B 109.5 . . ?
H24A C24 H24B 109.5 . . ?
C18 C24 H24C 109.5 . . ?
H24A C24 H24C 109.5 . . ?
H24B C24 H24C 109.5 . . ?
Sb1 C25 H25A 109.5 . . ?
Sb1 C25 H25B 109.5 . . ?
H25A C25 H25B 109.5 . . ?
Sb1 C25 H25C 109.5 . . ?
H25A C25 H25C 109.5 . . ?
H25B C25 H25C 109.5 . . ?
Si1 C26 H26A 109.5 . . ?
Si1 C26 H26B 109.5 . . ?
H26A C26 H26B 109.5 . . ?
Si1 C26 H26C 109.5 . . ?
H26A C26 H26C 109.5 . . ?
H26B C26 H26C 109.5 . . ?
Si1 C27 H27A 109.5 . . ?
Si1 C27 H27B 109.5 . . ?
H27A C27 H27B 109.5 . . ?
Si1 C27 H27C 109.5 . . ?
H27A C27 H27C 109.5 . . ?
H27B C27 H27C 109.5 . . ?
F2 C28 F1 110.3(4) . . ?
F2 C28 F3 108.9(3) . . ?
F1 C28 F3 107.5(3) . . ?
F2 C28 S1 111.4(2) . . ?
F1 C28 S1 110.1(3) . . ?
F3 C28 S1 108.5(3) . . ?
 
loop_
 _geom_torsion_atom_site_label_1
 _geom_torsion_atom_site_label_2
 _geom_torsion_atom_site_label_3
 _geom_torsion_atom_site_label_4
 _geom_torsion
 _geom_torsion_site_symmetry_1
 _geom_torsion_site_symmetry_2
 _geom_torsion_site_symmetry_3
 _geom_torsion_site_symmetry_4
 _geom_torsion_publ_flag
C25 Sb1 N1 C1 -125.63(14) . . . . ?
Cl1 Sb1 N1 C1 139.39(13) . . . . ?
C25 Sb1 N1 Si1 55.78(14) . . . . ?
Cl1 Sb1 N1 Si1 -39.20(11) . . . . ?
C1 N1 Si1 O1 140.34(16) . . . . ?
Sb1 N1 Si1 O1 -41.23(13) . . . . ?
C1 N1 Si1 C26 27.60(19) . . . . ?
Sb1 N1 Si1 C26 -153.97(12) . . . . ?
C1 N1 Si1 C27 -107.80(18) . . . . ?
Sb1 N1 Si1 C27 70.63(16) . . . . ?
S1 O1 Si1 N1 -169.63(15) . . . . ?
S1 O1 Si1 C26 -51.96(19) . . . . ?
S1 O1 Si1 C27 65.98(18) . . . . ?
Si1 O1 S1 O3 130.42(18) . . . . ?
Si1 O1 S1 O2 -5.9(2) . . . . ?
Si1 O1 S1 C28 -119.00(19) . . . . ?
Si1 N1 C1 C6 -128.15(18) . . . . ?
Sb1 N1 C1 C6 53.2(2) . . . . ?
Si1 N1 C1 C2 53.8(3) . . . . ?
Sb1 N1 C1 C2 -124.87(18) . . . . ?
C6 C1 C2 C3 1.0(3) . . . . ?
N1 C1 C2 C3 179.1(2) . . . . ?
C6 C1 C2 C7 -177.6(2) . . . . ?
N1 C1 C2 C7 0.5(3) . . . . ?
C1 C2 C3 C4 0.2(4) . . . . ?
C7 C2 C3 C4 178.9(3) . . . . ?
C2 C3 C4 C5 -0.4(5) . . . . ?
C3 C4 C5 C6 -0.7(4) . . . . ?
C4 C5 C6 C1 1.9(4) . . . . ?
C4 C5 C6 C13 -176.2(2) . . . . ?
C2 C1 C6 C5 -2.1(3) . . . . ?
N1 C1 C6 C5 179.7(2) . . . . ?
C2 C1 C6 C13 175.9(2) . . . . ?
N1 C1 C6 C13 -2.3(3) . . . . ?
C3 C2 C7 C8 -108.4(3) . . . . ?
C1 C2 C7 C8 70.3(3) . . . . ?
C3 C2 C7 C12 65.4(3) . . . . ?
C1 C2 C7 C12 -115.9(3) . . . . ?
C12 C7 C8 C9 4.8(3) . . . . ?
C2 C7 C8 C9 178.7(2) . . . . ?
C12 C7 C8 C19 -173.5(2) . . . . ?
C2 C7 C8 C19 0.4(3) . . . . ?
C7 C8 C9 C10 0.2(4) . . . . ?
C19 C8 C9 C10 178.6(2) . . . . ?
C8 C9 C10 C11 -4.0(4) . . . . ?
C8 C9 C10 C20 176.5(2) . . . . ?
C9 C10 C11 C12 2.7(4) . . . . ?
C20 C10 C11 C12 -177.8(3) . . . . ?
C10 C11 C12 C7 2.3(4) . . . . ?
C10 C11 C12 C21 -174.8(3) . . . . ?
C8 C7 C12 C11 -6.0(4) . . . . ?
C2 C7 C12 C11 -179.9(2) . . . . ?
C8 C7 C12 C21 170.9(2) . . . . ?
C2 C7 C12 C21 -2.9(4) . . . . ?
C5 C6 C13 C18 -104.8(3) . . . . ?
C1 C6 C13 C18 77.2(3) . . . . ?
C5 C6 C13 C14 67.7(3) . . . . ?
C1 C6 C13 C14 -110.3(2) . . . . ?
C18 C13 C14 C15 -3.8(3) . . . . ?
C6 C13 C14 C15 -176.5(2) . . . . ?
C18 C13 C14 C22 173.6(2) . . . . ?
C6 C13 C14 C22 0.9(3) . . . . ?
C13 C14 C15 C16 3.2(4) . . . . ?
C22 C14 C15 C16 -174.3(2) . . . . ?
C14 C15 C16 C17 -0.4(4) . . . . ?
C14 C15 C16 C23 179.8(3) . . . . ?
C15 C16 C17 C18 -1.8(4) . . . . ?
C23 C16 C17 C18 178.0(3) . . . . ?
C16 C17 C18 C13 1.1(4) . . . . ?
C16 C17 C18 C24 179.6(2) . . . . ?
C14 C13 C18 C17 1.7(3) . . . . ?
C6 C13 C18 C17 174.2(2) . . . . ?
C14 C13 C18 C24 -176.7(2) . . . . ?
C6 C13 C18 C24 -4.2(3) . . . . ?
O3 S1 C28 F2 50.8(3) . . . . ?
O2 S1 C28 F2 179.7(3) . . . . ?
O1 S1 C28 F2 -63.7(3) . . . . ?
O3 S1 C28 F1 173.5(3) . . . . ?
O2 S1 C28 F1 -57.6(3) . . . . ?
O1 S1 C28 F1 59.0(3) . . . . ?
O3 S1 C28 F3 -69.1(3) . . . . ?
O2 S1 C28 F3 59.7(3) . . . . ?
O1 S1 C28 F3 176.4(2) . . . . ?
 
_diffrn_measured_fraction_theta_max    0.997
_diffrn_reflns_theta_full              32.50
_diffrn_measured_fraction_theta_full   0.997
_refine_diff_density_max    2.820
_refine_diff_density_min   -0.834
_refine_diff_density_rms    0.107

#=============================================================================

data_av_ml131_ternsime2otf_sbmeotf

# start Validation Reply Form
_vrf_PLAT213_av_ml131_ternsime2otf_sbmeotf
;
PROBLEM: Atom F5B             has ADP max/min Ratio .....        5.6 prola
RESPONSE: Atom belongs to a disordered trifluorosulfonyl group.
;
# end Validation Reply Form
 
_audit_author_name                'Villinger, A.' 
_audit_creation_method            SHELXL-97 

#==============================================================================

# CHEMICAL DATA

_chemical_name_systematic
;
 ?
;
_chemical_name_common             ?
_chemical_melting_point           ?
_chemical_formula_moiety          'C29 H34 F6 N O6 S2 Sb Si'
_chemical_formula_sum
 'C29 H34 F6 N O6 S2 Sb Si'
_chemical_formula_weight          820.53
 
loop_
 _atom_type_symbol
 _atom_type_description
 _atom_type_scat_dispersion_real
 _atom_type_scat_dispersion_imag
 _atom_type_scat_source
 'C'  'C'   0.0033   0.0016
 'International Tables Vol C Tables 4.2.6.8 and 6.1.1.4'
 'H'  'H'   0.0000   0.0000
 'International Tables Vol C Tables 4.2.6.8 and 6.1.1.4'
 'N'  'N'   0.0061   0.0033
 'International Tables Vol C Tables 4.2.6.8 and 6.1.1.4'
 'O'  'O'   0.0106   0.0060
 'International Tables Vol C Tables 4.2.6.8 and 6.1.1.4'
 'F'  'F'   0.0171   0.0103
 'International Tables Vol C Tables 4.2.6.8 and 6.1.1.4'
 'Si'  'Si'   0.0817   0.0704
 'International Tables Vol C Tables 4.2.6.8 and 6.1.1.4'
 'S'  'S'   0.1246   0.1234
 'International Tables Vol C Tables 4.2.6.8 and 6.1.1.4'
 'Sb'  'Sb'  -0.5866   1.5461
 'International Tables Vol C Tables 4.2.6.8 and 6.1.1.4'
 
#==============================================================================

# CRYSTAL DATA
 
_symmetry_cell_setting            monoclinic
_symmetry_space_group_name_H-M    'P 21/n'
_symmetry_space_group_name_Hall   '-P 2yn'
_symmetry_Int_Tables_number       14
 
loop_
 _symmetry_equiv_pos_as_xyz
 'x, y, z'
 '-x+1/2, y+1/2, -z+1/2'
 '-x, -y, -z'
 'x-1/2, -y-1/2, z-1/2'
 
_cell_length_a                    12.7326(4)
_cell_length_b                    17.7845(6)
_cell_length_c                    15.0869(5)
_cell_angle_alpha                 90.00
_cell_angle_beta                  96.109(2)
_cell_angle_gamma                 90.00
_cell_volume                      3396.92(19)
_cell_formula_units_Z             4
_cell_measurement_temperature     173(2)
_cell_measurement_reflns_used     8925
_cell_measurement_theta_min       4.425
_cell_measurement_theta_max       51.897
 
_exptl_crystal_description        block
_exptl_crystal_colour             colourless
_exptl_crystal_size_max           0.33
_exptl_crystal_size_mid           0.24
_exptl_crystal_size_min           0.20
_exptl_crystal_density_meas       ?
_exptl_crystal_density_diffrn     1.604
_exptl_crystal_density_method     'not measured'
_exptl_crystal_F_000              1656
_exptl_absorpt_coefficient_mu     1.045
_exptl_absorpt_correction_type    'multi-scan'
_exptl_absorpt_correction_T_min   0.7243
_exptl_absorpt_correction_T_max   0.8183
_exptl_absorpt_process_details    '(SADABS; Sheldrick, 2004)'

#==============================================================================

# EXPERIMENTAL DATA
 
_exptl_special_details
;
 ?
;
 
_diffrn_ambient_temperature       173(2)
_diffrn_radiation_wavelength      0.71073
_diffrn_radiation_type            MoK\a
_diffrn_radiation_source          'sealed tube'
_diffrn_radiation_monochromator   graphite
_diffrn_measurement_device_type   'Bruker Apex Kappa II-CCD-diffractometer'
_diffrn_measurement_method        'phi and psi scans'
_diffrn_detector_area_resol_mean  ?
_diffrn_standards_number          ?
_diffrn_standards_interval_count  ?
_diffrn_standards_interval_time   ?
_diffrn_standards_decay_%         ?
_diffrn_reflns_number             38178
_diffrn_reflns_av_R_equivalents   0.0479
_diffrn_reflns_av_sigmaI/netI     0.0504
_diffrn_reflns_limit_h_min        -16
_diffrn_reflns_limit_h_max        16
_diffrn_reflns_limit_k_min        -23
_diffrn_reflns_limit_k_max        22
_diffrn_reflns_limit_l_min        -19
_diffrn_reflns_limit_l_max        19
_diffrn_reflns_theta_min          2.66
_diffrn_reflns_theta_max          28.00
_reflns_number_total              8164
_reflns_number_gt                 5176
_reflns_threshold_expression      >2\s(I)
 
_computing_data_collection        'Bruker Apex v2.0-2'
_computing_cell_refinement        'Bruker Apex v2.0-2'
_computing_data_reduction         'Bruker SAINT'
_computing_structure_solution     'SHELXS-97 (Sheldrick, 1997)'
_computing_structure_refinement   'SHELXL-97 (Sheldrick, 1997)'
_computing_molecular_graphics     'ORTEP-3 (Farrugia, 1997)' 
_computing_publication_material   'SHELXL-97'

#==============================================================================

# REFINEMENT DATA 

_refine_special_details
;
 All H atoms  were positioned geometrically and refined using a 
 riding model , with C---H = 0.98 (methyl groups), 0.99\%A (methylene groups), 
 1.00\%A (methine groups) or 0.95 \%A (aryl CH) and with <i>U</i>~iso~(H) = 
 1.5 times <i>U</i>~eq~(C) (methyl groups) or with <i>U</i>~iso~(H) = 1.2 times 
 <i>U</i>~eq~(C) (methylene  groups, aryl CH, methine groups). Torsion angles 
 of all methyl groups were allowed to refine.
 
 The whole N(SiMe2OTf)SbMeOTf unit was found to be disordered and was split in 
 two parts. The occupancy of each part was refined freely 
 (0.7444(14)/0.2556(14)). The Si---C, Si---O, Sb---C and Sb---O distances of 
 disordered groups were restrained to be equal for both parts (esd 0.04) but 
 refined freely. The Uij of O1b/O4a, O2a/O2b, O3a/O3b, C26a/C26b and 
 C28a/C28b were restrained to be equal but refined freely.
 
 Refinement of F^2^ against ALL reflections.  The weighted R-factor wR and
 goodness of fit S are based on F^2^, conventional R-factors R are based
 on F, with F set to zero for negative F^2^. The threshold expression of
 F^2^ > 2\s(F^2^) is used only for calculating R-factors(gt) etc. and is
 not relevant to the choice of reflections for refinement.  R-factors based
 on F^2^ are statistically about twice as large as those based on F, and R-
 factors based on ALL data will be even larger.
;
 
_refine_ls_structure_factor_coef  Fsqd
_refine_ls_matrix_type            full
_refine_ls_weighting_scheme       calc
_refine_ls_weighting_details
 'calc w=1/[\s^2^(Fo^2^)+(0.0506P)^2^+3.4290P] where P=(Fo^2^+2Fc^2^)/3'
_atom_sites_solution_primary      direct
_atom_sites_solution_secondary    difmap
_atom_sites_solution_hydrogens    geom
_refine_ls_hydrogen_treatment     constr
_refine_ls_extinction_method      none
_refine_ls_extinction_coef        ?
_refine_ls_number_reflns          8164
_refine_ls_number_parameters      584
_refine_ls_number_restraints      5
_refine_ls_R_factor_all           0.0992
_refine_ls_R_factor_gt            0.0496
_refine_ls_wR_factor_ref          0.1308
_refine_ls_wR_factor_gt           0.1196
_refine_ls_goodness_of_fit_ref    1.086
_refine_ls_restrained_S_all       1.087
_refine_ls_shift/su_max           0.001
_refine_ls_shift/su_mean          0.000

#==============================================================================

# ATOMIC COORDINATES AND DISPLACEMENT PARAMETERS
 
loop_
 _atom_site_label
 _atom_site_type_symbol
 _atom_site_fract_x
 _atom_site_fract_y
 _atom_site_fract_z
 _atom_site_U_iso_or_equiv
 _atom_site_adp_type
 _atom_site_occupancy
 _atom_site_symmetry_multiplicity
 _atom_site_calc_flag
 _atom_site_refinement_flags
 _atom_site_disorder_assembly
 _atom_site_disorder_group
S1A S 0.1743(3) 0.09936(15) 0.5507(2) 0.0447(6) Uani 0.7444(14) 1 d P A 1
O1A O 0.1873(10) 0.1202(7) 0.4606(6) 0.0545(16) Uani 0.7444(14) 1 d PD A 1
O2A O 0.2147(6) 0.1508(4) 0.6179(5) 0.0739(17) Uani 0.7444(14) 1 d P A 1
O3A O 0.0812(9) 0.0645(8) 0.5587(9) 0.0686(19) Uani 0.7444(14) 1 d P A 1
C28A C 0.2719(10) 0.0211(6) 0.5673(6) 0.073(4) Uani 0.7444(14) 1 d P A 1
F1A F 0.2449(5) -0.0330(3) 0.5036(4) 0.0813(14) Uani 0.7444(14) 1 d P A 1
F2A F 0.2692(5) -0.0101(4) 0.6455(4) 0.114(2) Uani 0.7444(14) 1 d P A 1
F3A F 0.3647(4) 0.0452(4) 0.5582(3) 0.0781(16) Uani 0.7444(14) 1 d P A 1
Sb1A Sb 0.09868(9) 0.08573(7) 0.33569(8) 0.0383(2) Uani 0.7444(14) 1 d PD A 1
Si1A Si 0.2168(3) 0.2529(4) 0.3014(4) 0.0427(10) Uani 0.7444(14) 1 d PD A 1
C25A C -0.0353(5) 0.1449(4) 0.3692(5) 0.0434(15) Uani 0.7444(14) 1 d PD A 1
H25A H -0.0826 0.1102 0.3961 0.065 Uiso 0.7444(14) 1 calc PR A 1
H25B H -0.0725 0.1671 0.3152 0.065 Uiso 0.7444(14) 1 calc PR A 1
H25C H -0.0130 0.1849 0.4118 0.065 Uiso 0.7444(14) 1 calc PR A 1
C26A C 0.3095(10) 0.2698(5) 0.4030(7) 0.053(2) Uani 0.7444(14) 1 d PD A 1
H26A H 0.3812 0.2558 0.3914 0.079 Uiso 0.7444(14) 1 calc PR A 1
H26B H 0.2882 0.2394 0.4523 0.079 Uiso 0.7444(14) 1 calc PR A 1
H26C H 0.3080 0.3231 0.4191 0.079 Uiso 0.7444(14) 1 calc PR A 1
C27A C 0.2430(5) 0.3168(3) 0.2108(4) 0.0508(14) Uani 0.7444(14) 1 d PD A 1
H27A H 0.2480 0.2878 0.1562 0.076 Uiso 0.7444(14) 1 calc PR A 1
H27B H 0.3096 0.3434 0.2272 0.076 Uiso 0.7444(14) 1 calc PR A 1
H27C H 0.1853 0.3533 0.2007 0.076 Uiso 0.7444(14) 1 calc PR A 1
S2A S 0.0583(3) 0.3549(2) 0.3702(3) 0.0824(11) Uani 0.7444(14) 1 d P A 1
O4A O 0.0978(7) 0.2805(6) 0.3372(8) 0.051(3) Uani 0.7444(14) 1 d PD A 1
O5A O 0.0183(9) 0.3440(8) 0.4526(7) 0.144(5) Uani 0.7444(14) 1 d P A 1
O6A O 0.1265(8) 0.4139(4) 0.3534(6) 0.108(3) Uani 0.7444(14) 1 d P A 1
C29A C -0.0617(12) 0.3664(7) 0.2912(11) 0.092(3) Uani 0.7444(14) 1 d P A 1
F5A F -0.1089(10) 0.4294(6) 0.3206(7) 0.213(5) Uani 0.7444(14) 1 d P A 1
F6A F -0.1192(5) 0.3126(5) 0.2851(7) 0.145(3) Uani 0.7444(14) 1 d P A 1
F4A F -0.0308(10) 0.3812(7) 0.2151(8) 0.115(3) Uani 0.7444(14) 1 d P A 1
S1B S 0.1728(16) 0.0883(12) 0.5574(11) 0.151(8) Uani 0.2556(14) 1 d P A 2
C28B C 0.281(3) 0.0589(14) 0.5805(19) 0.073(4) Uani 0.2556(14) 1 d P A 2
F3B F 0.3825(17) 0.0895(10) 0.5666(16) 0.107(8) Uani 0.2556(14) 1 d P A 2
F2B F 0.2979(18) 0.0411(10) 0.6704(12) 0.121(8) Uani 0.2556(14) 1 d P A 2
F1B F 0.285(3) -0.0125(11) 0.5410(16) 0.116(10) Uani 0.2556(14) 1 d P A 2
O1B O 0.187(3) 0.1214(19) 0.4540(18) 0.051(3) Uani 0.2556(14) 1 d PD A 2
O2B O 0.192(2) 0.1759(15) 0.5971(16) 0.0739(17) Uani 0.2556(14) 1 d P A 2
O3B O 0.062(4) 0.053(3) 0.571(3) 0.0686(19) Uani 0.2556(14) 1 d P A 2
Sb1B Sb 0.2526(3) 0.2534(3) 0.2939(3) 0.0503(8) Uani 0.2556(14) 1 d PD A 2
Si1B Si 0.1281(10) 0.0918(7) 0.3479(10) 0.043(3) Uani 0.2556(14) 1 d PD A 2
C25B C 0.337(2) 0.2518(17) 0.4219(14) 0.049(7) Uani 0.2556(14) 1 d PD A 2
H25D H 0.3713 0.3006 0.4340 0.073 Uiso 0.2556(14) 1 calc PR A 2
H25E H 0.3904 0.2121 0.4246 0.073 Uiso 0.2556(14) 1 calc PR A 2
H25F H 0.2880 0.2421 0.4665 0.073 Uiso 0.2556(14) 1 calc PR A 2
C27B C 0.1377(14) -0.0074(7) 0.3405(11) 0.051(4) Uani 0.2556(14) 1 d PD A 2
H27D H 0.0993 -0.0306 0.3864 0.076 Uiso 0.2556(14) 1 calc PR A 2
H27E H 0.2121 -0.0223 0.3497 0.076 Uiso 0.2556(14) 1 calc PR A 2
H27F H 0.1069 -0.0240 0.2815 0.076 Uiso 0.2556(14) 1 calc PR A 2
C26B C -0.0064(17) 0.1270(14) 0.3631(18) 0.053(2) Uani 0.2556(14) 1 d PD A 2
H26D H -0.0060 0.1821 0.3639 0.079 Uiso 0.2556(14) 1 calc PR A 2
H26E H -0.0275 0.1081 0.4196 0.079 Uiso 0.2556(14) 1 calc PR A 2
H26F H -0.0567 0.1093 0.3138 0.079 Uiso 0.2556(14) 1 calc PR A 2
S2B S 0.1045(6) 0.3583(8) 0.3887(9) 0.070(3) Uani 0.2556(14) 1 d P A 2
O4B O 0.105(2) 0.287(2) 0.340(3) 0.089(13) Uani 0.2556(14) 1 d PD A 2
O5B O 0.086(2) 0.353(2) 0.4752(19) 0.109(9) Uani 0.2556(14) 1 d P A 2
O6B O 0.1880(11) 0.4077(13) 0.368(2) 0.103(9) Uani 0.2556(14) 1 d P A 2
C29B C -0.016(2) 0.3903(15) 0.319(2) 0.058(7) Uani 0.2556(14) 1 d P A 2
F4B F 0.008(3) 0.399(2) 0.240(4) 0.17(2) Uani 0.2556(14) 1 d P A 2
F5B F -0.0314(14) 0.4570(12) 0.341(3) 0.219(18) Uani 0.2556(14) 1 d P A 2
F6B F -0.0938(17) 0.3391(15) 0.3562(17) 0.126(7) Uani 0.2556(14) 1 d P A 2
N1 N 0.1880(3) 0.15852(18) 0.2730(2) 0.0409(8) Uani 1 1 d . . .
C1 C 0.2191(3) 0.1264(2) 0.1921(2) 0.0407(9) Uani 1 1 d . A .
C2 C 0.3252(3) 0.1269(2) 0.1740(3) 0.0442(9) Uani 1 1 d . . .
C3 C 0.3520(4) 0.0956(2) 0.0940(3) 0.0519(11) Uani 1 1 d . A .
H3 H 0.4232 0.0975 0.0805 0.062 Uiso 1 1 calc R . .
C4 C 0.2764(4) 0.0622(3) 0.0349(3) 0.0569(12) Uani 1 1 d . . .
H4 H 0.2953 0.0410 -0.0190 0.068 Uiso 1 1 calc R A .
C5 C 0.1731(4) 0.0598(2) 0.0541(3) 0.0543(11) Uani 1 1 d . A .
H5 H 0.1218 0.0356 0.0133 0.065 Uiso 1 1 calc R . .
C6 C 0.1415(3) 0.0914(2) 0.1310(3) 0.0437(9) Uani 1 1 d . . .
C7 C 0.4140(3) 0.1587(2) 0.2347(3) 0.0429(9) Uani 1 1 d . A .
C8 C 0.4491(3) 0.1205(2) 0.3139(3) 0.0492(10) Uani 1 1 d . . .
C9 C 0.5355(3) 0.1485(3) 0.3684(3) 0.0598(13) Uani 1 1 d . A .
H9 H 0.5578 0.1233 0.4227 0.072 Uiso 1 1 calc R . .
C10 C 0.5890(4) 0.2110(3) 0.3461(4) 0.0638(14) Uani 1 1 d . . .
C11 C 0.5582(4) 0.2468(3) 0.2685(4) 0.0613(13) Uani 1 1 d . A .
H11 H 0.5963 0.2898 0.2525 0.074 Uiso 1 1 calc R . .
C12 C 0.4717(4) 0.2219(3) 0.2114(3) 0.0555(11) Uani 1 1 d . . .
C13 C 0.0272(3) 0.0910(2) 0.1428(2) 0.0366(8) Uani 1 1 d . A .
C14 C -0.0337(4) 0.1571(2) 0.1286(3) 0.0447(10) Uani 1 1 d . . .
C15 C -0.1400(3) 0.1559(2) 0.1359(3) 0.0452(10) Uani 1 1 d . A .
H15 H -0.1792 0.2012 0.1266 0.054 Uiso 1 1 calc R . .
C16 C -0.1919(3) 0.0914(2) 0.1562(3) 0.0437(9) Uani 1 1 d . . .
C17 C -0.1331(4) 0.0260(2) 0.1681(3) 0.0512(11) Uani 1 1 d . A .
H17 H -0.1676 -0.0191 0.1822 0.061 Uiso 1 1 calc R . .
C18 C -0.0258(3) 0.0242(2) 0.1600(3) 0.0468(10) Uani 1 1 d . . .
C19 C 0.3968(4) 0.0483(3) 0.3392(3) 0.0642(13) Uani 1 1 d . A .
H19A H 0.3387 0.0601 0.3746 0.096 Uiso 1 1 calc R . .
H19B H 0.4488 0.0167 0.3744 0.096 Uiso 1 1 calc R . .
H19C H 0.3691 0.0214 0.2851 0.096 Uiso 1 1 calc R . .
C20 C 0.6857(4) 0.2385(4) 0.4068(5) 0.099(2) Uani 1 1 d . A .
H20A H 0.6777 0.2250 0.4687 0.148 Uiso 1 1 calc R . .
H20B H 0.6917 0.2932 0.4017 0.148 Uiso 1 1 calc R . .
H20C H 0.7496 0.2147 0.3888 0.148 Uiso 1 1 calc R . .
C21 C 0.4492(5) 0.2594(3) 0.1218(4) 0.0690(14) Uani 1 1 d . A .
H21A H 0.4641 0.3134 0.1278 0.104 Uiso 1 1 calc R . .
H21B H 0.3748 0.2520 0.0995 0.104 Uiso 1 1 calc R . .
H21C H 0.4941 0.2373 0.0798 0.104 Uiso 1 1 calc R . .
C22 C 0.0174(4) 0.2293(3) 0.1014(4) 0.0676(14) Uani 1 1 d . A .
H22A H -0.0358 0.2692 0.0937 0.101 Uiso 1 1 calc R . .
H22B H 0.0477 0.2214 0.0450 0.101 Uiso 1 1 calc R . .
H22C H 0.0735 0.2440 0.1477 0.101 Uiso 1 1 calc R . .
C23 C -0.3098(4) 0.0927(3) 0.1625(3) 0.0634(13) Uani 1 1 d . A .
H23A H -0.3475 0.0930 0.1024 0.095 Uiso 1 1 calc R . .
H23B H -0.3281 0.1380 0.1945 0.095 Uiso 1 1 calc R . .
H23C H -0.3301 0.0480 0.1946 0.095 Uiso 1 1 calc R . .
C24 C 0.0304(4) -0.0511(3) 0.1658(4) 0.0745(15) Uani 1 1 d . A .
H24A H 0.0149 -0.0782 0.1093 0.112 Uiso 1 1 calc R . .
H24B H 0.0059 -0.0809 0.2142 0.112 Uiso 1 1 calc R . .
H24C H 0.1068 -0.0430 0.1775 0.112 Uiso 1 1 calc R . .
 
loop_
 _atom_site_aniso_label
 _atom_site_aniso_U_11
 _atom_site_aniso_U_22
 _atom_site_aniso_U_33
 _atom_site_aniso_U_23
 _atom_site_aniso_U_13
 _atom_site_aniso_U_12
S1A 0.0452(15) 0.0560(11) 0.0323(14) -0.0048(7) 0.0011(10) 0.0035(9)
O1A 0.067(3) 0.058(3) 0.035(3) 0.000(2) -0.014(3) -0.013(2)
O2A 0.078(4) 0.096(6) 0.044(4) -0.025(3) -0.010(3) 0.023(3)
O3A 0.051(6) 0.093(6) 0.066(5) 0.022(3) 0.027(3) -0.008(4)
C28A 0.115(8) 0.053(8) 0.052(5) 0.013(6) 0.021(5) 0.037(9)
F1A 0.115(4) 0.053(3) 0.076(4) 0.003(2) 0.006(3) 0.022(3)
F2A 0.128(5) 0.151(6) 0.065(3) 0.060(4) 0.026(3) 0.063(4)
F3A 0.050(3) 0.120(6) 0.064(3) 0.007(4) 0.005(2) 0.018(3)
Sb1A 0.0425(6) 0.0377(3) 0.0348(2) 0.00121(19) 0.0048(3) 0.0019(3)
Si1A 0.054(2) 0.0317(11) 0.0410(17) -0.0042(10) -0.0030(18) -0.0013(18)
C25A 0.037(3) 0.048(4) 0.047(3) 0.002(3) 0.012(3) 0.007(3)
C26A 0.072(6) 0.037(5) 0.048(4) -0.006(3) -0.002(4) -0.001(4)
C27A 0.062(4) 0.041(3) 0.050(3) 0.001(2) 0.010(3) -0.005(3)
S2A 0.133(3) 0.0494(15) 0.0705(19) -0.0015(12) 0.038(2) 0.037(2)
O4A 0.065(5) 0.029(4) 0.063(6) 0.004(3) 0.029(4) 0.017(4)
O5A 0.209(12) 0.162(9) 0.073(7) 0.017(6) 0.070(8) 0.109(10)
O6A 0.166(8) 0.025(3) 0.137(6) -0.006(3) 0.028(7) -0.008(5)
C29A 0.102(11) 0.051(7) 0.126(13) 0.018(7) 0.020(9) 0.017(7)
F5A 0.252(11) 0.170(9) 0.226(10) 0.028(7) 0.072(9) 0.172(9)
F6A 0.070(4) 0.172(8) 0.196(9) 0.079(6) 0.030(5) 0.050(5)
F4A 0.136(9) 0.094(6) 0.117(6) 0.027(5) 0.030(7) 0.020(6)
S1B 0.121(12) 0.29(2) 0.046(6) 0.056(8) 0.026(6) 0.106(11)
C28B 0.115(8) 0.053(8) 0.052(5) 0.013(6) 0.021(5) 0.037(9)
F3B 0.086(12) 0.094(14) 0.135(16) 0.021(12) -0.023(10) -0.022(11)
F2B 0.172(17) 0.091(12) 0.087(12) 0.034(9) -0.041(11) -0.033(12)
F1B 0.18(2) 0.053(13) 0.098(18) 0.001(10) -0.076(15) 0.010(13)
O1B 0.065(5) 0.029(4) 0.063(6) 0.004(3) 0.029(4) 0.017(4)
O2B 0.078(4) 0.096(6) 0.044(4) -0.025(3) -0.010(3) 0.023(3)
O3B 0.051(6) 0.093(6) 0.066(5) 0.022(3) 0.027(3) -0.008(4)
Sb1B 0.068(2) 0.0335(8) 0.0510(10) -0.0056(6) 0.0126(15) -0.0098(15)
Si1B 0.037(6) 0.029(4) 0.066(7) 0.030(4) 0.016(5) 0.008(4)
C25B 0.07(2) 0.034(13) 0.048(14) 0.004(9) 0.032(13) 0.000(11)
C27B 0.063(11) 0.029(8) 0.055(10) 0.006(6) -0.016(8) -0.015(7)
C26B 0.072(6) 0.037(5) 0.048(4) -0.006(3) -0.002(4) -0.001(4)
S2B 0.049(4) 0.068(5) 0.093(7) -0.033(4) 0.010(4) 0.007(4)
O4B 0.12(2) 0.064(17) 0.10(2) -0.033(13) 0.059(18) -0.050(14)
O5B 0.14(2) 0.122(17) 0.062(14) -0.016(11) 0.015(15) 0.07(2)
O6B 0.030(8) 0.057(11) 0.22(3) -0.031(12) -0.009(11) -0.002(8)
C29B 0.049(14) 0.027(12) 0.10(2) -0.008(12) 0.007(14) -0.015(9)
F4B 0.12(2) 0.083(19) 0.30(6) 0.08(2) -0.03(3) -0.009(14)
F5B 0.067(11) 0.076(12) 0.50(5) -0.088(19) -0.005(19) 0.048(10)
F6B 0.092(13) 0.135(17) 0.150(19) -0.026(17) 0.011(14) -0.003(11)
N1 0.0435(19) 0.0443(18) 0.0357(17) -0.0097(13) 0.0081(15) -0.0040(15)
C1 0.050(2) 0.038(2) 0.034(2) -0.0036(15) 0.0079(17) 0.0023(18)
C2 0.050(2) 0.042(2) 0.041(2) -0.0053(17) 0.0095(19) -0.0047(18)
C3 0.055(3) 0.056(3) 0.047(2) -0.0034(19) 0.015(2) 0.000(2)
C4 0.071(3) 0.058(3) 0.044(2) -0.014(2) 0.015(2) 0.003(2)
C5 0.067(3) 0.053(3) 0.043(2) -0.0151(19) 0.006(2) -0.004(2)
C6 0.049(2) 0.048(2) 0.034(2) -0.0048(17) 0.0037(17) 0.0031(19)
C7 0.041(2) 0.043(2) 0.046(2) -0.0044(17) 0.0120(18) 0.0080(18)
C8 0.044(2) 0.050(2) 0.055(3) -0.010(2) 0.014(2) 0.008(2)
C9 0.043(3) 0.077(3) 0.058(3) -0.017(2) 0.001(2) 0.017(2)
C10 0.040(3) 0.075(4) 0.078(4) -0.029(3) 0.016(2) -0.002(2)
C11 0.055(3) 0.051(3) 0.082(4) -0.019(2) 0.025(3) -0.009(2)
C12 0.055(3) 0.047(3) 0.068(3) -0.007(2) 0.025(2) 0.000(2)
C13 0.038(2) 0.035(2) 0.0354(19) -0.0030(15) 0.0000(16) 0.0027(17)
C14 0.062(3) 0.038(2) 0.033(2) -0.0008(15) 0.0027(19) 0.0012(19)
C15 0.055(3) 0.041(2) 0.039(2) -0.0013(16) 0.0003(19) 0.0112(19)
C16 0.049(2) 0.048(2) 0.034(2) -0.0065(17) 0.0039(17) 0.0031(19)
C17 0.061(3) 0.039(2) 0.054(3) -0.0045(18) 0.010(2) -0.006(2)
C18 0.054(3) 0.033(2) 0.052(2) -0.0031(17) 0.001(2) 0.0014(18)
C19 0.074(3) 0.064(3) 0.055(3) 0.007(2) 0.007(2) 0.001(3)
C20 0.047(3) 0.129(6) 0.118(5) -0.059(4) 0.003(3) -0.003(3)
C21 0.086(4) 0.048(3) 0.078(4) 0.001(2) 0.031(3) -0.008(3)
C22 0.068(3) 0.051(3) 0.083(4) 0.015(2) 0.011(3) -0.004(2)
C23 0.058(3) 0.069(3) 0.067(3) -0.005(2) 0.023(2) 0.001(2)
C24 0.075(4) 0.041(3) 0.105(4) 0.006(3) 0.002(3) 0.012(2)

#==============================================================================

# MOLECULAR GEOMETRY 
 
_geom_special_details
;
 All s.u.'s (except the s.u. in the dihedral angle between two l.s. planes)
 are estimated using the full covariance matrix.  The cell s.u.'s are taken
 into account individually in the estimation of s.u.'s in distances, angles
 and torsion angles; correlations between s.u.'s in cell parameters are only
 used when they are defined by crystal symmetry.  An approximate (isotropic)
 treatment of cell s.u.'s is used for estimating s.u.'s involving l.s. planes.
;
 
loop_
 _geom_bond_atom_site_label_1
 _geom_bond_atom_site_label_2
 _geom_bond_distance
 _geom_bond_site_symmetry_2
 _geom_bond_publ_flag
S1A O3A 1.355(9) . ?
S1A O2A 1.421(9) . ?
S1A O1A 1.436(13) . ?
S1A C28A 1.864(9) . ?
O1A Sb1A 2.179(6) . ?
C28A F3A 1.277(14) . ?
C28A F2A 1.309(10) . ?
C28A F1A 1.377(12) . ?
Sb1A N1 2.023(3) . ?
Sb1A C25A 2.111(5) . ?
Si1A O4A 1.733(7) . ?
Si1A N1 1.761(7) . ?
Si1A C27A 1.835(8) . ?
Si1A C26A 1.858(10) . ?
C25A H25A 0.9800 . ?
C25A H25B 0.9800 . ?
C25A H25C 0.9800 . ?
C26A H26A 0.9800 . ?
C26A H26B 0.9800 . ?
C26A H26C 0.9800 . ?
C27A H27A 0.9800 . ?
C27A H27B 0.9800 . ?
C27A H27C 0.9800 . ?
S2A O6A 1.402(10) . ?
S2A O5A 1.406(11) . ?
S2A O4A 1.518(10) . ?
S2A C29A 1.846(17) . ?
C29A F6A 1.201(17) . ?
C29A F4A 1.281(18) . ?
C29A F5A 1.368(13) . ?
S1B C28B 1.48(4) . ?
S1B O3B 1.58(4) . ?
S1B O2B 1.68(4) . ?
S1B O1B 1.69(4) . ?
C28B F2B 1.39(3) . ?
C28B F1B 1.41(3) . ?
C28B F3B 1.44(4) . ?
O1B Si1B 1.77(2) . ?
Sb1B N1 1.889(5) . ?
Sb1B C25B 2.107(18) . ?
Sb1B O4B 2.16(2) . ?
Si1B C27B 1.771(15) . ?
Si1B N1 1.858(14) . ?
Si1B C26B 1.861(18) . ?
C25B H25D 0.9800 . ?
C25B H25E 0.9800 . ?
C25B H25F 0.9800 . ?
C27B H27D 0.9800 . ?
C27B H27E 0.9800 . ?
C27B H27F 0.9800 . ?
C26B H26D 0.9800 . ?
C26B H26E 0.9800 . ?
C26B H26F 0.9800 . ?
S2B O5B 1.35(3) . ?
S2B O6B 1.44(3) . ?
S2B O4B 1.47(4) . ?
S2B C29B 1.85(3) . ?
C29B F5B 1.26(3) . ?
C29B F4B 1.27(6) . ?
C29B F6B 1.50(4) . ?
N1 C1 1.441(5) . ?
C1 C2 1.407(6) . ?
C1 C6 1.420(5) . ?
C2 C3 1.404(5) . ?
C2 C7 1.489(6) . ?
C3 C4 1.376(6) . ?
C3 H3 0.9500 . ?
C4 C5 1.377(6) . ?
C4 H4 0.9500 . ?
C5 C6 1.388(6) . ?
C5 H5 0.9500 . ?
C6 C13 1.485(6) . ?
C7 C8 1.405(6) . ?
C7 C12 1.408(6) . ?
C8 C9 1.393(6) . ?
C8 C19 1.515(6) . ?
C9 C10 1.365(7) . ?
C9 H9 0.9500 . ?
C10 C11 1.354(7) . ?
C10 C20 1.535(7) . ?
C11 C12 1.396(7) . ?
C11 H11 0.9500 . ?
C12 C21 1.507(7) . ?
C13 C18 1.405(5) . ?
C13 C14 1.412(5) . ?
C14 C15 1.369(6) . ?
C14 C22 1.517(6) . ?
C15 C16 1.376(6) . ?
C15 H15 0.9500 . ?
C16 C17 1.383(6) . ?
C16 C23 1.514(6) . ?
C17 C18 1.385(6) . ?
C17 H17 0.9500 . ?
C18 C24 1.516(6) . ?
C19 H19A 0.9800 . ?
C19 H19B 0.9800 . ?
C19 H19C 0.9800 . ?
C20 H20A 0.9800 . ?
C20 H20B 0.9800 . ?
C20 H20C 0.9800 . ?
C21 H21A 0.9800 . ?
C21 H21B 0.9800 . ?
C21 H21C 0.9800 . ?
C22 H22A 0.9800 . ?
C22 H22B 0.9800 . ?
C22 H22C 0.9800 . ?
C23 H23A 0.9800 . ?
C23 H23B 0.9800 . ?
C23 H23C 0.9800 . ?
C24 H24A 0.9800 . ?
C24 H24B 0.9800 . ?
C24 H24C 0.9800 . ?
 
loop_
 _geom_angle_atom_site_label_1
 _geom_angle_atom_site_label_2
 _geom_angle_atom_site_label_3
 _geom_angle
 _geom_angle_site_symmetry_1
 _geom_angle_site_symmetry_3
 _geom_angle_publ_flag
O3A S1A O2A 119.0(8) . . ?
O3A S1A O1A 113.1(8) . . ?
O2A S1A O1A 116.1(6) . . ?
O3A S1A C28A 103.0(8) . . ?
O2A S1A C28A 101.5(5) . . ?
O1A S1A C28A 100.2(6) . . ?
S1A O1A Sb1A 130.1(9) . . ?
F3A C28A F2A 110.6(10) . . ?
F3A C28A F1A 109.0(7) . . ?
F2A C28A F1A 107.7(10) . . ?
F3A C28A S1A 110.3(8) . . ?
F2A C28A S1A 110.9(6) . . ?
F1A C28A S1A 108.3(7) . . ?
N1 Sb1A C25A 107.6(2) . . ?
N1 Sb1A O1A 87.6(4) . . ?
C25A Sb1A O1A 90.6(4) . . ?
O4A Si1A N1 100.3(5) . . ?
O4A Si1A C27A 106.9(5) . . ?
N1 Si1A C27A 117.3(4) . . ?
O4A Si1A C26A 101.3(7) . . ?
N1 Si1A C26A 116.9(5) . . ?
C27A Si1A C26A 111.4(5) . . ?
O6A S2A O5A 123.5(8) . . ?
O6A S2A O4A 111.1(6) . . ?
O5A S2A O4A 109.5(7) . . ?
O6A S2A C29A 106.6(6) . . ?
O5A S2A C29A 103.5(7) . . ?
O4A S2A C29A 99.5(6) . . ?
S2A O4A Si1A 132.9(8) . . ?
F6A C29A F4A 109.8(17) . . ?
F6A C29A F5A 113.1(13) . . ?
F4A C29A F5A 108.0(11) . . ?
F6A C29A S2A 114.6(9) . . ?
F4A C29A S2A 106.8(11) . . ?
F5A C29A S2A 104.1(12) . . ?
C28B S1B O3B 131(3) . . ?
C28B S1B O2B 98.5(19) . . ?
O3B S1B O2B 115(3) . . ?
C28B S1B O1B 98.9(19) . . ?
O3B S1B O1B 116(2) . . ?
O2B S1B O1B 88.9(16) . . ?
F2B C28B F1B 101(2) . . ?
F2B C28B F3B 100(3) . . ?
F1B C28B F3B 102(3) . . ?
F2B C28B S1B 111(2) . . ?
F1B C28B S1B 107(3) . . ?
F3B C28B S1B 131(2) . . ?
S1B O1B Si1B 131(3) . . ?
N1 Sb1B C25B 108.1(9) . . ?
N1 Sb1B O4B 85.4(12) . . ?
C25B Sb1B O4B 94.8(16) . . ?
C27B Si1B O1B 109.1(14) . . ?
C27B Si1B N1 124.2(10) . . ?
O1B Si1B N1 101.5(15) . . ?
C27B Si1B C26B 114.4(12) . . ?
O1B Si1B C26B 95.3(15) . . ?
N1 Si1B C26B 107.6(11) . . ?
Sb1B C25B H25D 109.5 . . ?
Sb1B C25B H25E 109.5 . . ?
H25D C25B H25E 109.5 . . ?
Sb1B C25B H25F 109.5 . . ?
H25D C25B H25F 109.5 . . ?
H25E C25B H25F 109.5 . . ?
Si1B C27B H27D 109.5 . . ?
Si1B C27B H27E 109.5 . . ?
H27D C27B H27E 109.5 . . ?
Si1B C27B H27F 109.5 . . ?
H27D C27B H27F 109.5 . . ?
H27E C27B H27F 109.5 . . ?
Si1B C26B H26D 109.5 . . ?
Si1B C26B H26E 109.5 . . ?
H26D C26B H26E 109.5 . . ?
Si1B C26B H26F 109.5 . . ?
H26D C26B H26F 109.5 . . ?
H26E C26B H26F 109.5 . . ?
O5B S2B O6B 117(2) . . ?
O5B S2B O4B 116(2) . . ?
O6B S2B O4B 112.4(17) . . ?
O5B S2B C29B 110.7(16) . . ?
O6B S2B C29B 106.0(16) . . ?
O4B S2B C29B 91.7(18) . . ?
S2B O4B Sb1B 117(2) . . ?
F5B C29B F4B 102(4) . . ?
F5B C29B F6B 110(3) . . ?
F4B C29B F6B 131(3) . . ?
F5B C29B S2B 106(2) . . ?
F4B C29B S2B 108(3) . . ?
F6B C29B S2B 98.1(19) . . ?
C1 N1 Si1A 121.0(3) . . ?
C1 N1 Si1B 115.4(5) . . ?
Si1A N1 Si1B 123.3(5) . . ?
C1 N1 Sb1B 110.0(3) . . ?
Si1A N1 Sb1B 14.6(2) . . ?
Si1B N1 Sb1B 132.0(5) . . ?
C1 N1 Sb1A 111.2(2) . . ?
Si1A N1 Sb1A 127.5(2) . . ?
Si1B N1 Sb1A 11.2(4) . . ?
Sb1B N1 Sb1A 138.6(2) . . ?
C2 C1 C6 119.6(3) . . ?
C2 C1 N1 121.2(3) . . ?
C6 C1 N1 119.2(3) . . ?
C3 C2 C1 119.4(4) . . ?
C3 C2 C7 116.2(4) . . ?
C1 C2 C7 124.4(3) . . ?
C4 C3 C2 120.8(4) . . ?
C4 C3 H3 119.6 . . ?
C2 C3 H3 119.6 . . ?
C3 C4 C5 119.7(4) . . ?
C3 C4 H4 120.1 . . ?
C5 C4 H4 120.1 . . ?
C4 C5 C6 122.1(4) . . ?
C4 C5 H5 119.0 . . ?
C6 C5 H5 119.0 . . ?
C5 C6 C1 118.5(4) . . ?
C5 C6 C13 118.2(4) . . ?
C1 C6 C13 123.2(3) . . ?
C8 C7 C12 118.2(4) . . ?
C8 C7 C2 119.4(4) . . ?
C12 C7 C2 122.1(4) . . ?
C9 C8 C7 119.3(4) . . ?
C9 C8 C19 119.6(4) . . ?
C7 C8 C19 121.1(4) . . ?
C10 C9 C8 121.9(5) . . ?
C10 C9 H9 119.0 . . ?
C8 C9 H9 119.0 . . ?
C11 C10 C9 119.4(5) . . ?
C11 C10 C20 120.4(5) . . ?
C9 C10 C20 120.1(6) . . ?
C10 C11 C12 121.5(5) . . ?
C10 C11 H11 119.3 . . ?
C12 C11 H11 119.3 . . ?
C11 C12 C7 119.8(5) . . ?
C11 C12 C21 118.4(4) . . ?
C7 C12 C21 121.6(4) . . ?
C18 C13 C14 117.8(4) . . ?
C18 C13 C6 121.5(3) . . ?
C14 C13 C6 120.5(3) . . ?
C15 C14 C13 120.4(4) . . ?
C15 C14 C22 119.4(4) . . ?
C13 C14 C22 120.1(4) . . ?
C14 C15 C16 122.2(4) . . ?
C14 C15 H15 118.9 . . ?
C16 C15 H15 118.9 . . ?
C15 C16 C17 117.6(4) . . ?
C15 C16 C23 120.3(4) . . ?
C17 C16 C23 122.1(4) . . ?
C16 C17 C18 122.3(4) . . ?
C16 C17 H17 118.8 . . ?
C18 C17 H17 118.8 . . ?
C17 C18 C13 119.6(4) . . ?
C17 C18 C24 118.7(4) . . ?
C13 C18 C24 121.6(4) . . ?
C8 C19 H19A 109.5 . . ?
C8 C19 H19B 109.5 . . ?
H19A C19 H19B 109.5 . . ?
C8 C19 H19C 109.5 . . ?
H19A C19 H19C 109.5 . . ?
H19B C19 H19C 109.5 . . ?
C10 C20 H20A 109.5 . . ?
C10 C20 H20B 109.5 . . ?
H20A C20 H20B 109.5 . . ?
C10 C20 H20C 109.5 . . ?
H20A C20 H20C 109.5 . . ?
H20B C20 H20C 109.5 . . ?
C12 C21 H21A 109.5 . . ?
C12 C21 H21B 109.5 . . ?
H21A C21 H21B 109.5 . . ?
C12 C21 H21C 109.5 . . ?
H21A C21 H21C 109.5 . . ?
H21B C21 H21C 109.5 . . ?
C14 C22 H22A 109.5 . . ?
C14 C22 H22B 109.5 . . ?
H22A C22 H22B 109.5 . . ?
C14 C22 H22C 109.5 . . ?
H22A C22 H22C 109.5 . . ?
H22B C22 H22C 109.5 . . ?
C16 C23 H23A 109.5 . . ?
C16 C23 H23B 109.5 . . ?
H23A C23 H23B 109.5 . . ?
C16 C23 H23C 109.5 . . ?
H23A C23 H23C 109.5 . . ?
H23B C23 H23C 109.5 . . ?
C18 C24 H24A 109.5 . . ?
C18 C24 H24B 109.5 . . ?
H24A C24 H24B 109.5 . . ?
C18 C24 H24C 109.5 . . ?
H24A C24 H24C 109.5 . . ?
H24B C24 H24C 109.5 . . ?
 
loop_
 _geom_torsion_atom_site_label_1
 _geom_torsion_atom_site_label_2
 _geom_torsion_atom_site_label_3
 _geom_torsion_atom_site_label_4
 _geom_torsion
 _geom_torsion_site_symmetry_1
 _geom_torsion_site_symmetry_2
 _geom_torsion_site_symmetry_3
 _geom_torsion_site_symmetry_4
 _geom_torsion_publ_flag
O3A S1A O1A Sb1A -13.7(13) . . . . ?
O2A S1A O1A Sb1A -156.5(7) . . . . ?
C28A S1A O1A Sb1A 95.2(10) . . . . ?
O3A S1A C28A F3A 177.6(9) . . . . ?
O2A S1A C28A F3A -58.7(7) . . . . ?
O1A S1A C28A F3A 60.8(8) . . . . ?
O3A S1A C28A F2A -59.6(12) . . . . ?
O2A S1A C28A F2A 64.2(11) . . . . ?
O1A S1A C28A F2A -176.3(10) . . . . ?
O3A S1A C28A F1A 58.4(10) . . . . ?
O2A S1A C28A F1A -177.9(7) . . . . ?
O1A S1A C28A F1A -58.4(9) . . . . ?
S1A O1A Sb1A N1 175.9(10) . . . . ?
S1A O1A Sb1A C25A 68.4(10) . . . . ?
O6A S2A O4A Si1A 12.3(12) . . . . ?
O5A S2A O4A Si1A -127.5(10) . . . . ?
C29A S2A O4A Si1A 124.4(10) . . . . ?
N1 Si1A O4A S2A -178.0(9) . . . . ?
C27A Si1A O4A S2A -55.1(11) . . . . ?
C26A Si1A O4A S2A 61.6(11) . . . . ?
O6A S2A C29A F6A 166.3(11) . . . . ?
O5A S2A C29A F6A -62.1(14) . . . . ?
O4A S2A C29A F6A 50.7(13) . . . . ?
O6A S2A C29A F4A 44.4(11) . . . . ?
O5A S2A C29A F4A 176.0(11) . . . . ?
O4A S2A C29A F4A -71.1(11) . . . . ?
O6A S2A C29A F5A -69.7(11) . . . . ?
O5A S2A C29A F5A 61.9(11) . . . . ?
O4A S2A C29A F5A 174.8(10) . . . . ?
O3B S1B C28B F2B -56(4) . . . . ?
O2B S1B C28B F2B 78(2) . . . . ?
O1B S1B C28B F2B 168(2) . . . . ?
O3B S1B C28B F1B 54(4) . . . . ?
O2B S1B C28B F1B -172(2) . . . . ?
O1B S1B C28B F1B -82(3) . . . . ?
O3B S1B C28B F3B 178(3) . . . . ?
O2B S1B C28B F3B -48(3) . . . . ?
O1B S1B C28B F3B 42(3) . . . . ?
C28B S1B O1B Si1B 113(3) . . . . ?
O3B S1B O1B Si1B -31(4) . . . . ?
O2B S1B O1B Si1B -148(2) . . . . ?
S1B O1B Si1B C27B -47(3) . . . . ?
S1B O1B Si1B N1 -180(2) . . . . ?
S1B O1B Si1B C26B 71(3) . . . . ?
O5B S2B O4B Sb1B -115(2) . . . . ?
O6B S2B O4B Sb1B 23(3) . . . . ?
C29B S2B O4B Sb1B 131(2) . . . . ?
N1 Sb1B O4B S2B 167(3) . . . . ?
C25B Sb1B O4B S2B 59(3) . . . . ?
O5B S2B C29B F5B 67(3) . . . . ?
O6B S2B C29B F5B -61(3) . . . . ?
O4B S2B C29B F5B -174(3) . . . . ?
O5B S2B C29B F4B 176(3) . . . . ?
O6B S2B C29B F4B 48(3) . . . . ?
O4B S2B C29B F4B -66(3) . . . . ?
O5B S2B C29B F6B -46(2) . . . . ?
O6B S2B C29B F6B -174.1(17) . . . . ?
O4B S2B C29B F6B 72(2) . . . . ?
O4A Si1A N1 C1 136.6(5) . . . . ?
C27A Si1A N1 C1 21.3(5) . . . . ?
C26A Si1A N1 C1 -115.0(6) . . . . ?
O4A Si1A N1 Si1B -49.3(7) . . . . ?
C27A Si1A N1 Si1B -164.5(5) . . . . ?
C26A Si1A N1 Si1B 59.2(7) . . . . ?
O4A Si1A N1 Sb1B -180.0(16) . . . . ?
C27A Si1A N1 Sb1B 64.7(12) . . . . ?
C26A Si1A N1 Sb1B -71.6(13) . . . . ?
O4A Si1A N1 Sb1A -36.5(6) . . . . ?
C27A Si1A N1 Sb1A -151.7(3) . . . . ?
C26A Si1A N1 Sb1A 72.0(6) . . . . ?
C27B Si1B N1 C1 16.4(11) . . . . ?
O1B Si1B N1 C1 139.3(11) . . . . ?
C26B Si1B N1 C1 -121.3(10) . . . . ?
C27B Si1B N1 Si1A -158.1(9) . . . . ?
O1B Si1B N1 Si1A -35.2(12) . . . . ?
C26B Si1B N1 Si1A 64.2(11) . . . . ?
C27B Si1B N1 Sb1B -143.2(9) . . . . ?
O1B Si1B N1 Sb1B -20.3(13) . . . . ?
C26B Si1B N1 Sb1B 79.1(11) . . . . ?
C27B Si1B N1 Sb1A 86(3) . . . . ?
O1B Si1B N1 Sb1A -151(3) . . . . ?
C26B Si1B N1 Sb1A -51(2) . . . . ?
C25B Sb1B N1 C1 -124.5(9) . . . . ?
O4B Sb1B N1 C1 142.0(13) . . . . ?
C25B Sb1B N1 Si1A 94.3(16) . . . . ?
O4B Sb1B N1 Si1A 0.8(18) . . . . ?
C25B Sb1B N1 Si1B 35.9(11) . . . . ?
O4B Sb1B N1 Si1B -57.6(14) . . . . ?
C25B Sb1B N1 Sb1A 48.9(10) . . . . ?
O4B Sb1B N1 Sb1A -44.6(13) . . . . ?
C25A Sb1A N1 C1 -131.9(3) . . . . ?
O1A Sb1A N1 C1 138.3(4) . . . . ?
C25A Sb1A N1 Si1A 41.7(4) . . . . ?
O1A Sb1A N1 Si1A -48.1(4) . . . . ?
C25A Sb1A N1 Si1B 114(2) . . . . ?
O1A Sb1A N1 Si1B 24(2) . . . . ?
C25A Sb1A N1 Sb1B 54.8(4) . . . . ?
O1A Sb1A N1 Sb1B -35.1(5) . . . . ?
Si1A N1 C1 C2 56.4(5) . . . . ?
Si1B N1 C1 C2 -118.2(5) . . . . ?
Sb1B N1 C1 C2 45.8(5) . . . . ?
Sb1A N1 C1 C2 -129.5(3) . . . . ?
Si1A N1 C1 C6 -125.7(4) . . . . ?
Si1B N1 C1 C6 59.7(6) . . . . ?
Sb1B N1 C1 C6 -136.3(3) . . . . ?
Sb1A N1 C1 C6 48.4(4) . . . . ?
C6 C1 C2 C3 2.7(6) . . . . ?
N1 C1 C2 C3 -179.4(4) . . . . ?
C6 C1 C2 C7 -177.1(4) . . . . ?
N1 C1 C2 C7 0.8(6) . . . . ?
C1 C2 C3 C4 -2.3(6) . . . . ?
C7 C2 C3 C4 177.5(4) . . . . ?
C2 C3 C4 C5 0.3(7) . . . . ?
C3 C4 C5 C6 1.3(7) . . . . ?
C4 C5 C6 C1 -0.9(7) . . . . ?
C4 C5 C6 C13 175.5(4) . . . . ?
C2 C1 C6 C5 -1.1(6) . . . . ?
N1 C1 C6 C5 -179.1(4) . . . . ?
C2 C1 C6 C13 -177.3(4) . . . . ?
N1 C1 C6 C13 4.8(6) . . . . ?
C3 C2 C7 C8 -107.7(4) . . . . ?
C1 C2 C7 C8 72.1(5) . . . . ?
C3 C2 C7 C12 65.6(5) . . . . ?
C1 C2 C7 C12 -114.6(5) . . . . ?
C12 C7 C8 C9 3.3(6) . . . . ?
C2 C7 C8 C9 176.9(4) . . . . ?
C12 C7 C8 C19 -174.6(4) . . . . ?
C2 C7 C8 C19 -1.1(6) . . . . ?
C7 C8 C9 C10 -1.7(6) . . . . ?
C19 C8 C9 C10 176.3(4) . . . . ?
C8 C9 C10 C11 -0.6(7) . . . . ?
C8 C9 C10 C20 -178.2(4) . . . . ?
C9 C10 C11 C12 1.1(7) . . . . ?
C20 C10 C11 C12 178.8(4) . . . . ?
C10 C11 C12 C7 0.6(7) . . . . ?
C10 C11 C12 C21 -173.5(4) . . . . ?
C8 C7 C12 C11 -2.8(6) . . . . ?
C2 C7 C12 C11 -176.2(4) . . . . ?
C8 C7 C12 C21 171.1(4) . . . . ?
C2 C7 C12 C21 -2.2(6) . . . . ?
C5 C6 C13 C18 70.8(5) . . . . ?
C1 C6 C13 C18 -113.0(5) . . . . ?
C5 C6 C13 C14 -103.3(5) . . . . ?
C1 C6 C13 C14 72.9(5) . . . . ?
C18 C13 C14 C15 3.0(6) . . . . ?
C6 C13 C14 C15 177.3(3) . . . . ?
C18 C13 C14 C22 -174.4(4) . . . . ?
C6 C13 C14 C22 -0.1(6) . . . . ?
C13 C14 C15 C16 -0.5(6) . . . . ?
C22 C14 C15 C16 176.8(4) . . . . ?
C14 C15 C16 C17 -0.9(6) . . . . ?
C14 C15 C16 C23 -179.3(4) . . . . ?
C15 C16 C17 C18 -0.1(6) . . . . ?
C23 C16 C17 C18 178.2(4) . . . . ?
C16 C17 C18 C13 2.6(6) . . . . ?
C16 C17 C18 C24 -174.5(4) . . . . ?
C14 C13 C18 C17 -4.0(6) . . . . ?
C6 C13 C18 C17 -178.2(4) . . . . ?
C14 C13 C18 C24 173.0(4) . . . . ?
C6 C13 C18 C24 -1.2(6) . . . . ?
 
_diffrn_measured_fraction_theta_max    0.996
_diffrn_reflns_theta_full              28.00
_diffrn_measured_fraction_theta_full   0.996
_refine_diff_density_max    0.652
_refine_diff_density_min   -0.471
_refine_diff_density_rms    0.078

#=============================================================================
 
data_is_ch07

_audit_author_name                'Villinger, A.' 
_audit_creation_method            SHELXL-97 

#==============================================================================

# CHEMICAL DATA

_chemical_name_systematic
;
 ?
;
_chemical_name_common             ?
_chemical_melting_point           ?
_chemical_formula_moiety          'C27 H34 Cl0.13 N6.63 Sb Si'
_chemical_formula_sum
 'C27 H34 Cl0.13 N6.63 Sb Si'
_chemical_formula_weight          605.63
 
loop_
 _atom_type_symbol
 _atom_type_description
 _atom_type_scat_dispersion_real
 _atom_type_scat_dispersion_imag
 _atom_type_scat_source
 'C'  'C'   0.0033   0.0016
 'International Tables Vol C Tables 4.2.6.8 and 6.1.1.4'
 'H'  'H'   0.0000   0.0000
 'International Tables Vol C Tables 4.2.6.8 and 6.1.1.4'
 'N'  'N'   0.0061   0.0033
 'International Tables Vol C Tables 4.2.6.8 and 6.1.1.4'
 'Si'  'Si'   0.0817   0.0704
 'International Tables Vol C Tables 4.2.6.8 and 6.1.1.4'
 'Sb'  'Sb'  -0.5866   1.5461
 'International Tables Vol C Tables 4.2.6.8 and 6.1.1.4'
 'Cl'  'Cl'   0.1484   0.1585
 'International Tables Vol C Tables 4.2.6.8 and 6.1.1.4'
 
#==============================================================================

# CRYSTAL DATA
 
_symmetry_cell_setting            triclinic
_symmetry_space_group_name_H-M    'P -1'
_symmetry_space_group_name_Hall   '-P 1'
_symmetry_Int_Tables_number       2
 
loop_
 _symmetry_equiv_pos_as_xyz
 'x, y, z'
 '-x, -y, -z'
 
_cell_length_a                    10.8087(3)
_cell_length_b                    11.6186(4)
_cell_length_c                    12.4497(4)
_cell_angle_alpha                 72.4640(10)
_cell_angle_beta                  71.9590(10)
_cell_angle_gamma                 87.9850(10)
_cell_volume                      1414.59(8)
_cell_formula_units_Z             2
_cell_measurement_temperature     173(2)
_cell_measurement_reflns_used     9761
_cell_measurement_theta_min       5.242 
_cell_measurement_theta_max       65.088
 
_exptl_crystal_description        block
_exptl_crystal_colour             colourless
_exptl_crystal_size_max           0.51
_exptl_crystal_size_mid           0.38
_exptl_crystal_size_min           0.25
_exptl_crystal_density_meas       ?
_exptl_crystal_density_diffrn     1.422
_exptl_crystal_density_method     'not measured'
_exptl_crystal_F_000              619
_exptl_absorpt_coefficient_mu     1.057
_exptl_absorpt_correction_type    multi-scan
_exptl_absorpt_correction_T_min   0.6147
_exptl_absorpt_correction_T_max   0.7780
_exptl_absorpt_process_details    '(SADABS; Sheldrick, 2004)'

#==============================================================================

# EXPERIMENTAL DATA
 
_exptl_special_details
;
 ?
;
 
_diffrn_ambient_temperature       173(2)
_diffrn_radiation_wavelength      0.71073
_diffrn_radiation_type            MoK\a
_diffrn_radiation_source          'sealed tube'
_diffrn_radiation_monochromator   graphite
_diffrn_measurement_device_type   'Bruker Apex Kappa II-CCD-diffractometer'
_diffrn_measurement_method        'phi and omega scans'
_diffrn_detector_area_resol_mean  ?
_diffrn_standards_number          ?
_diffrn_standards_interval_count  ?
_diffrn_standards_interval_time   ?
_diffrn_standards_decay_%         ?
_diffrn_reflns_number             37090
_diffrn_reflns_av_R_equivalents   0.0250
_diffrn_reflns_av_sigmaI/netI     0.0221
_diffrn_reflns_limit_h_min        -16
_diffrn_reflns_limit_h_max        15
_diffrn_reflns_limit_k_min        -17
_diffrn_reflns_limit_k_max        17
_diffrn_reflns_limit_l_min        -18
_diffrn_reflns_limit_l_max        18
_diffrn_reflns_theta_min          2.23
_diffrn_reflns_theta_max          32.50
_reflns_number_total              10188
_reflns_number_gt                 9118
_reflns_threshold_expression      >2\s(I)
 
_computing_data_collection        'Bruker Apex V7.51A'
_computing_cell_refinement        'Bruker Apex V7.51A'
_computing_data_reduction         'Bruker SAINT'
_computing_structure_solution     'SHELXS-97 (Sheldrick, 1997)'
_computing_structure_refinement   'SHELXL-97 (Sheldrick, 1997)'
_computing_molecular_graphics     'ORTEP-3v2.01 (Farrugia, 1997)' 
_computing_publication_material   'SHELXL-97'

#==============================================================================

# REFINEMENT DATA 

_refine_special_details
;
 All H atoms were positioned geometrically and refined using a riding model, 
 with C---H = 0.98 (methyl groups), 0.99\%A (methylene groups), 
 1.00\%A (methine groups) or 0.95 \%A (aryl CH) and with <i>U</i>~iso~(H) = 
 1.5 times <i>U</i>~eq~(C) (methyl groups) or with <i>U</i>~iso~(H) = 1.2 times 
 <i>U</i>~eq~(C) (methylene  groups, aryl CH, methine groups). Torsion angles 
 of all methyl groups were allowed to refine.
 
 One of the azide groups (N4/N5/N7) was found to be partially occupied by 
 chlorine. The occupancy was refined freely (azide: 0.875(5)/chlorine: 
 0.125(5)).
 
 Refinement of F^2^ against ALL reflections.  The weighted R-factor wR and
 goodness of fit S are based on F^2^, conventional R-factors R are based
 on F, with F set to zero for negative F^2^. The threshold expression of
 F^2^ > 2\s(F^2^) is used only for calculating R-factors(gt) etc. and is
 not relevant to the choice of reflections for refinement.  R-factors based
 on F^2^ are statistically about twice as large as those based on F, and R-
 factors based on ALL data will be even larger.
;
 
_refine_ls_structure_factor_coef  Fsqd
_refine_ls_matrix_type            full
_refine_ls_weighting_scheme       calc
_refine_ls_weighting_details
 'calc w=1/[\s^2^(Fo^2^)+(0.0294P)^2^+0.4655P] where P=(Fo^2^+2Fc^2^)/3'
_atom_sites_solution_primary      direct
_atom_sites_solution_secondary    difmap
_atom_sites_solution_hydrogens    geom
_refine_ls_hydrogen_treatment     constr
_refine_ls_extinction_method      none
_refine_ls_extinction_coef        ?
_refine_ls_number_reflns          10188
_refine_ls_number_parameters      344
_refine_ls_number_restraints      0
_refine_ls_R_factor_all           0.0298
_refine_ls_R_factor_gt            0.0240
_refine_ls_wR_factor_ref          0.0636
_refine_ls_wR_factor_gt           0.0595
_refine_ls_goodness_of_fit_ref    1.054
_refine_ls_restrained_S_all       1.054
_refine_ls_shift/su_max           0.004
_refine_ls_shift/su_mean          0.000

#==============================================================================

# ATOMIC COORDINATES AND DISPLACEMENT PARAMETERS
 
loop_
 _atom_site_label
 _atom_site_type_symbol
 _atom_site_fract_x
 _atom_site_fract_y
 _atom_site_fract_z
 _atom_site_U_iso_or_equiv
 _atom_site_adp_type
 _atom_site_occupancy
 _atom_site_symmetry_multiplicity
 _atom_site_calc_flag
 _atom_site_refinement_flags
 _atom_site_disorder_assembly
 _atom_site_disorder_group
Sb1 Sb 0.854354(8) 0.887628(8) 0.672395(8) 0.02772(3) Uani 1 1 d . . .
Si1 Si 0.58444(3) 0.77639(3) 0.64731(3) 0.02660(7) Uani 1 1 d . . .
N1 N 0.72321(10) 0.75504(9) 0.69776(9) 0.02249(18) Uani 1 1 d . A .
N2 N 0.84364(15) 0.98166(13) 0.50066(11) 0.0400(3) Uani 1 1 d . A .
N3 N 0.80032(14) 1.07758(13) 0.47968(13) 0.0415(3) Uani 1 1 d . . .
N4 N 0.7609(2) 1.17000(16) 0.45129(19) 0.0645(5) Uani 1 1 d . A .
N5 N 0.7339(6) 1.0104(4) 0.7392(5) 0.0507(9) Uani 0.875(5) 1 d P A 1
N6 N 0.7807(3) 1.07079(16) 0.7855(2) 0.0529(6) Uani 0.875(5) 1 d P A 1
N7 N 0.8163(3) 1.13051(19) 0.8285(2) 0.0838(10) Uani 0.875(5) 1 d P A 1
Cl1 Cl 0.7359(11) 1.0424(7) 0.7478(9) 0.047(2) Uani 0.125(5) 1 d P A 2
C1 C 0.75253(11) 0.63890(10) 0.76420(10) 0.01991(19) Uani 1 1 d . . .
C2 C 0.77127(11) 0.53963(11) 0.71811(10) 0.02084(19) Uani 1 1 d . A .
C3 C 0.79152(12) 0.42672(11) 0.78920(11) 0.0242(2) Uani 1 1 d . . .
H3 H 0.8013 0.3599 0.7589 0.029 Uiso 1 1 calc R A .
C4 C 0.79772(14) 0.40929(12) 0.90225(11) 0.0283(2) Uani 1 1 d . A .
H4 H 0.8089 0.3312 0.9500 0.034 Uiso 1 1 calc R . .
C5 C 0.78737(14) 0.50739(12) 0.94452(11) 0.0280(2) Uani 1 1 d . . .
H5 H 0.7947 0.4968 1.0210 0.034 Uiso 1 1 calc R A .
C6 C 0.76626(12) 0.62221(11) 0.87712(10) 0.0233(2) Uani 1 1 d . A .
C7 C 0.77832(11) 0.54752(11) 0.59415(10) 0.0213(2) Uani 1 1 d . . .
C8 C 0.87988(11) 0.61880(11) 0.49746(10) 0.0225(2) Uani 1 1 d . A .
C9 C 0.88891(12) 0.62121(12) 0.38276(11) 0.0265(2) Uani 1 1 d . . .
H9 H 0.9561 0.6714 0.3179 0.032 Uiso 1 1 calc R A .
C10 C 0.80305(13) 0.55270(13) 0.36021(11) 0.0276(2) Uani 1 1 d . A .
C11 C 0.70658(13) 0.47869(12) 0.45654(11) 0.0273(2) Uani 1 1 d . . .
H11 H 0.6480 0.4300 0.4427 0.033 Uiso 1 1 calc R A .
C12 C 0.69325(12) 0.47370(11) 0.57302(11) 0.0239(2) Uani 1 1 d . A .
C13 C 0.76685(13) 0.72190(12) 0.93043(10) 0.0252(2) Uani 1 1 d . . .
C14 C 0.88626(13) 0.76151(12) 0.93525(11) 0.0281(2) Uani 1 1 d . A .
C15 C 0.88649(16) 0.84271(15) 0.99813(14) 0.0378(3) Uani 1 1 d . . .
H15 H 0.9673 0.8709 0.9995 0.045 Uiso 1 1 calc R A .
C16 C 0.77201(18) 0.88320(15) 1.05846(15) 0.0432(4) Uani 1 1 d . A .
C17 C 0.65501(17) 0.84429(15) 1.05255(14) 0.0396(3) Uani 1 1 d . . .
H17 H 0.5761 0.8732 1.0922 0.048 Uiso 1 1 calc R A .
C18 C 0.64991(14) 0.76396(13) 0.99006(12) 0.0309(3) Uani 1 1 d . A .
C19 C 0.98532(12) 0.68895(13) 0.51182(12) 0.0278(2) Uani 1 1 d . . .
H19A H 1.0709 0.6694 0.4670 0.042 Uiso 1 1 calc R A .
H19B H 0.9784 0.6672 0.5960 0.042 Uiso 1 1 calc R . .
H19C H 0.9752 0.7758 0.4818 0.042 Uiso 1 1 calc R . .
C20 C 0.81599(17) 0.55593(17) 0.23517(13) 0.0389(3) Uani 1 1 d . . .
H20A H 0.7987 0.4742 0.2339 0.058 Uiso 1 1 calc R A .
H20B H 0.9046 0.5861 0.1834 0.058 Uiso 1 1 calc R . .
H20C H 0.7531 0.6096 0.2070 0.058 Uiso 1 1 calc R . .
C21 C 0.58969(14) 0.38389(14) 0.67020(12) 0.0320(3) Uani 1 1 d . . .
H21A H 0.5111 0.3849 0.6466 0.048 Uiso 1 1 calc R A .
H21B H 0.5687 0.4060 0.7436 0.048 Uiso 1 1 calc R . .
H21C H 0.6222 0.3026 0.6834 0.048 Uiso 1 1 calc R . .
C22 C 1.01399(14) 0.71430(15) 0.87887(14) 0.0344(3) Uani 1 1 d . . .
H22A H 1.0856 0.7735 0.8610 0.052 Uiso 1 1 calc R A .
H22B H 1.0123 0.7009 0.8053 0.052 Uiso 1 1 calc R . .
H22C H 1.0270 0.6378 0.9337 0.052 Uiso 1 1 calc R . .
C23 C 0.7744(3) 0.9672(2) 1.1298(2) 0.0676(7) Uani 1 1 d . . .
H23A H 0.8545 0.9585 1.1520 0.101 Uiso 1 1 calc R A .
H23B H 0.6986 0.9466 1.2017 0.101 Uiso 1 1 calc R . .
H23C H 0.7717 1.0509 1.0821 0.101 Uiso 1 1 calc R . .
C24 C 0.52085(15) 0.72085(17) 0.98998(14) 0.0403(3) Uani 1 1 d . . .
H24A H 0.4504 0.7515 1.0436 0.060 Uiso 1 1 calc R A .
H24B H 0.5131 0.6322 1.0169 0.060 Uiso 1 1 calc R . .
H24C H 0.5146 0.7507 0.9095 0.060 Uiso 1 1 calc R . .
C25 C 0.46140(15) 0.64834(16) 0.73990(15) 0.0387(3) Uani 1 1 d . A .
H25A H 0.4828 0.5790 0.7096 0.058 Uiso 1 1 calc R . .
H25B H 0.3747 0.6730 0.7366 0.058 Uiso 1 1 calc R . .
H25C H 0.4619 0.6255 0.8222 0.058 Uiso 1 1 calc R . .
C26 C 0.50931(16) 0.91719(15) 0.67114(15) 0.0397(3) Uani 1 1 d . A .
H26A H 0.4970 0.9158 0.7529 0.060 Uiso 1 1 calc R . .
H26B H 0.4247 0.9221 0.6570 0.060 Uiso 1 1 calc R . .
H26C H 0.5668 0.9877 0.6160 0.060 Uiso 1 1 calc R . .
C27 C 0.61787(16) 0.79065(15) 0.48802(13) 0.0363(3) Uani 1 1 d . A .
H27A H 0.6880 0.8534 0.4395 0.055 Uiso 1 1 calc R . .
H27B H 0.5388 0.8128 0.4658 0.055 Uiso 1 1 calc R . .
H27C H 0.6445 0.7133 0.4747 0.055 Uiso 1 1 calc R . .
 
loop_
 _atom_site_aniso_label
 _atom_site_aniso_U_11
 _atom_site_aniso_U_22
 _atom_site_aniso_U_33
 _atom_site_aniso_U_23
 _atom_site_aniso_U_13
 _atom_site_aniso_U_12
Sb1 0.02880(5) 0.02452(5) 0.02621(5) -0.00305(3) -0.00786(3) -0.00102(3)
Si1 0.02403(15) 0.03029(17) 0.02440(16) -0.00547(13) -0.00945(13) 0.00697(13)
N1 0.0230(4) 0.0229(4) 0.0200(4) -0.0038(3) -0.0074(4) 0.0033(3)
N2 0.0478(8) 0.0361(7) 0.0276(6) -0.0009(5) -0.0079(5) -0.0027(5)
N3 0.0364(7) 0.0404(7) 0.0414(7) 0.0004(6) -0.0150(6) -0.0063(5)
N4 0.0664(11) 0.0412(9) 0.0794(13) 0.0037(8) -0.0357(10) 0.0068(8)
N5 0.0597(15) 0.043(2) 0.0577(16) -0.0241(14) -0.0222(11) 0.0096(16)
N6 0.0867(16) 0.0215(7) 0.0488(10) -0.0090(7) -0.0210(11) 0.0066(8)
N7 0.153(3) 0.0316(10) 0.0826(18) -0.0241(10) -0.0517(18) 0.0032(13)
Cl1 0.057(3) 0.042(4) 0.044(3) -0.017(3) -0.0140(19) 0.002(3)
C1 0.0194(5) 0.0219(5) 0.0169(4) -0.0037(4) -0.0057(4) 0.0014(4)
C2 0.0210(5) 0.0237(5) 0.0178(4) -0.0047(4) -0.0075(4) 0.0013(4)
C3 0.0279(5) 0.0226(5) 0.0236(5) -0.0056(4) -0.0115(4) 0.0024(4)
C4 0.0363(6) 0.0241(5) 0.0247(6) -0.0015(4) -0.0157(5) 0.0019(5)
C5 0.0364(7) 0.0286(6) 0.0200(5) -0.0035(4) -0.0138(5) 0.0002(5)
C6 0.0257(5) 0.0261(5) 0.0183(5) -0.0061(4) -0.0080(4) 0.0008(4)
C7 0.0222(5) 0.0241(5) 0.0175(5) -0.0054(4) -0.0073(4) 0.0036(4)
C8 0.0218(5) 0.0249(5) 0.0204(5) -0.0068(4) -0.0063(4) 0.0028(4)
C9 0.0252(5) 0.0318(6) 0.0197(5) -0.0071(4) -0.0040(4) 0.0020(5)
C10 0.0295(6) 0.0350(6) 0.0199(5) -0.0104(5) -0.0083(4) 0.0047(5)
C11 0.0294(6) 0.0326(6) 0.0235(5) -0.0104(5) -0.0113(5) 0.0011(5)
C12 0.0243(5) 0.0266(5) 0.0207(5) -0.0058(4) -0.0081(4) 0.0004(4)
C13 0.0295(6) 0.0265(5) 0.0184(5) -0.0064(4) -0.0062(4) 0.0014(4)
C14 0.0311(6) 0.0305(6) 0.0226(5) -0.0094(5) -0.0069(5) -0.0004(5)
C15 0.0402(8) 0.0388(8) 0.0340(7) -0.0173(6) -0.0038(6) -0.0086(6)
C16 0.0528(9) 0.0371(8) 0.0357(8) -0.0201(6) 0.0017(7) -0.0071(7)
C17 0.0410(8) 0.0380(8) 0.0331(7) -0.0164(6) 0.0033(6) 0.0012(6)
C18 0.0316(6) 0.0339(7) 0.0221(5) -0.0077(5) -0.0019(5) 0.0011(5)
C19 0.0231(5) 0.0332(6) 0.0264(6) -0.0109(5) -0.0046(4) -0.0015(5)
C20 0.0429(8) 0.0538(9) 0.0219(6) -0.0141(6) -0.0097(6) -0.0024(7)
C21 0.0330(6) 0.0354(7) 0.0257(6) -0.0053(5) -0.0095(5) -0.0084(5)
C22 0.0309(6) 0.0426(8) 0.0354(7) -0.0164(6) -0.0143(6) 0.0054(6)
C23 0.0725(14) 0.0654(13) 0.0657(13) -0.0474(12) 0.0058(11) -0.0150(11)
C24 0.0296(7) 0.0571(10) 0.0305(7) -0.0148(7) -0.0027(5) 0.0014(6)
C25 0.0277(6) 0.0465(8) 0.0403(8) -0.0098(6) -0.0114(6) -0.0023(6)
C26 0.0343(7) 0.0405(8) 0.0440(8) -0.0133(7) -0.0130(6) 0.0163(6)
C27 0.0399(7) 0.0426(8) 0.0287(6) -0.0071(6) -0.0187(6) 0.0138(6)

#==============================================================================

# MOLECULAR GEOMETRY
 
_geom_special_details
;
 All s.u.'s (except the s.u. in the dihedral angle between two l.s. planes)
 are estimated using the full covariance matrix.  The cell s.u.'s are taken
 into account individually in the estimation of s.u.'s in distances, angles
 and torsion angles; correlations between s.u.'s in cell parameters are only
 used when they are defined by crystal symmetry.  An approximate (isotropic)
 treatment of cell s.u.'s is used for estimating s.u.'s involving l.s. planes.
;
 
loop_
 _geom_bond_atom_site_label_1
 _geom_bond_atom_site_label_2
 _geom_bond_distance
 _geom_bond_site_symmetry_2
 _geom_bond_publ_flag
Sb1 N1 2.0163(11) . ?
Sb1 N5 2.082(4) . ?
Sb1 N2 2.1249(13) . ?
Sb1 Cl1 2.422(9) . ?
Si1 N1 1.7803(11) . ?
Si1 C27 1.8582(15) . ?
Si1 C25 1.8620(16) . ?
Si1 C26 1.8637(15) . ?
N1 C1 1.4371(14) . ?
N2 N3 1.180(2) . ?
N3 N4 1.137(2) . ?
N5 N6 1.237(4) . ?
N6 N7 1.134(4) . ?
C1 C6 1.4137(15) . ?
C1 C2 1.4181(16) . ?
C2 C3 1.3973(16) . ?
C2 C7 1.4960(15) . ?
C3 C4 1.3829(17) . ?
C3 H3 0.9500 . ?
C4 C5 1.3799(19) . ?
C4 H4 0.9500 . ?
C5 C6 1.3995(17) . ?
C5 H5 0.9500 . ?
C6 C13 1.4995(18) . ?
C7 C8 1.4088(17) . ?
C7 C12 1.4112(17) . ?
C8 C9 1.3926(17) . ?
C8 C19 1.5081(18) . ?
C9 C10 1.3862(19) . ?
C9 H9 0.9500 . ?
C10 C11 1.3899(19) . ?
C10 C20 1.5083(18) . ?
C11 C12 1.3956(17) . ?
C11 H11 0.9500 . ?
C12 C21 1.5127(18) . ?
C13 C18 1.4077(18) . ?
C13 C14 1.4099(19) . ?
C14 C15 1.396(2) . ?
C14 C22 1.509(2) . ?
C15 C16 1.383(2) . ?
C15 H15 0.9500 . ?
C16 C17 1.388(3) . ?
C16 C23 1.510(2) . ?
C17 C18 1.395(2) . ?
C17 H17 0.9500 . ?
C18 C24 1.499(2) . ?
C19 H19A 0.9800 . ?
C19 H19B 0.9800 . ?
C19 H19C 0.9800 . ?
C20 H20A 0.9800 . ?
C20 H20B 0.9800 . ?
C20 H20C 0.9800 . ?
C21 H21A 0.9800 . ?
C21 H21B 0.9800 . ?
C21 H21C 0.9800 . ?
C22 H22A 0.9800 . ?
C22 H22B 0.9800 . ?
C22 H22C 0.9800 . ?
C23 H23A 0.9800 . ?
C23 H23B 0.9800 . ?
C23 H23C 0.9800 . ?
C24 H24A 0.9800 . ?
C24 H24B 0.9800 . ?
C24 H24C 0.9800 . ?
C25 H25A 0.9800 . ?
C25 H25B 0.9800 . ?
C25 H25C 0.9800 . ?
C26 H26A 0.9800 . ?
C26 H26B 0.9800 . ?
C26 H26C 0.9800 . ?
C27 H27A 0.9800 . ?
C27 H27B 0.9800 . ?
C27 H27C 0.9800 . ?
 
loop_
 _geom_angle_atom_site_label_1
 _geom_angle_atom_site_label_2
 _geom_angle_atom_site_label_3
 _geom_angle
 _geom_angle_site_symmetry_1
 _geom_angle_site_symmetry_3
 _geom_angle_publ_flag
N1 Sb1 N5 101.44(14) . . ?
N1 Sb1 N2 92.93(5) . . ?
N5 Sb1 N2 89.18(16) . . ?
N1 Sb1 Cl1 107.7(2) . . ?
N5 Sb1 Cl1 6.3(4) . . ?
N2 Sb1 Cl1 89.8(2) . . ?
N1 Si1 C27 115.23(6) . . ?
N1 Si1 C25 108.64(6) . . ?
C27 Si1 C25 109.37(8) . . ?
N1 Si1 C26 108.94(7) . . ?
C27 Si1 C26 107.23(7) . . ?
C25 Si1 C26 107.15(8) . . ?
C1 N1 Si1 122.76(8) . . ?
C1 N1 Sb1 112.23(7) . . ?
Si1 N1 Sb1 125.00(5) . . ?
N3 N2 Sb1 121.85(12) . . ?
N4 N3 N2 175.1(2) . . ?
N6 N5 Sb1 116.2(4) . . ?
N7 N6 N5 175.4(4) . . ?
C6 C1 C2 118.40(10) . . ?
C6 C1 N1 120.08(10) . . ?
C2 C1 N1 121.50(10) . . ?
C3 C2 C1 119.22(10) . . ?
C3 C2 C7 116.15(11) . . ?
C1 C2 C7 124.55(10) . . ?
C4 C3 C2 122.03(12) . . ?
C4 C3 H3 119.0 . . ?
C2 C3 H3 119.0 . . ?
C5 C4 C3 118.80(11) . . ?
C5 C4 H4 120.6 . . ?
C3 C4 H4 120.6 . . ?
C4 C5 C6 121.37(11) . . ?
C4 C5 H5 119.3 . . ?
C6 C5 H5 119.3 . . ?
C5 C6 C1 119.94(11) . . ?
C5 C6 C13 115.49(10) . . ?
C1 C6 C13 124.49(11) . . ?
C8 C7 C12 119.00(10) . . ?
C8 C7 C2 119.93(10) . . ?
C12 C7 C2 120.67(10) . . ?
C9 C8 C7 119.46(11) . . ?
C9 C8 C19 117.36(11) . . ?
C7 C8 C19 123.10(11) . . ?
C10 C9 C8 122.12(12) . . ?
C10 C9 H9 118.9 . . ?
C8 C9 H9 118.9 . . ?
C9 C10 C11 117.98(11) . . ?
C9 C10 C20 121.02(13) . . ?
C11 C10 C20 120.98(13) . . ?
C10 C11 C12 121.98(12) . . ?
C10 C11 H11 119.0 . . ?
C12 C11 H11 119.0 . . ?
C11 C12 C7 119.32(11) . . ?
C11 C12 C21 116.75(11) . . ?
C7 C12 C21 123.88(11) . . ?
C18 C13 C14 119.43(12) . . ?
C18 C13 C6 121.34(12) . . ?
C14 C13 C6 118.60(11) . . ?
C15 C14 C13 119.38(13) . . ?
C15 C14 C22 118.71(13) . . ?
C13 C14 C22 121.84(12) . . ?
C16 C15 C14 121.63(15) . . ?
C16 C15 H15 119.2 . . ?
C14 C15 H15 119.2 . . ?
C15 C16 C17 118.53(14) . . ?
C15 C16 C23 120.62(18) . . ?
C17 C16 C23 120.85(17) . . ?
C16 C17 C18 121.91(14) . . ?
C16 C17 H17 119.0 . . ?
C18 C17 H17 119.0 . . ?
C17 C18 C13 119.09(14) . . ?
C17 C18 C24 120.00(13) . . ?
C13 C18 C24 120.89(13) . . ?
C8 C19 H19A 109.5 . . ?
C8 C19 H19B 109.5 . . ?
H19A C19 H19B 109.5 . . ?
C8 C19 H19C 109.5 . . ?
H19A C19 H19C 109.5 . . ?
H19B C19 H19C 109.5 . . ?
C10 C20 H20A 109.5 . . ?
C10 C20 H20B 109.5 . . ?
H20A C20 H20B 109.5 . . ?
C10 C20 H20C 109.5 . . ?
H20A C20 H20C 109.5 . . ?
H20B C20 H20C 109.5 . . ?
C12 C21 H21A 109.5 . . ?
C12 C21 H21B 109.5 . . ?
H21A C21 H21B 109.5 . . ?
C12 C21 H21C 109.5 . . ?
H21A C21 H21C 109.5 . . ?
H21B C21 H21C 109.5 . . ?
C14 C22 H22A 109.5 . . ?
C14 C22 H22B 109.5 . . ?
H22A C22 H22B 109.5 . . ?
C14 C22 H22C 109.5 . . ?
H22A C22 H22C 109.5 . . ?
H22B C22 H22C 109.5 . . ?
C16 C23 H23A 109.5 . . ?
C16 C23 H23B 109.5 . . ?
H23A C23 H23B 109.5 . . ?
C16 C23 H23C 109.5 . . ?
H23A C23 H23C 109.5 . . ?
H23B C23 H23C 109.5 . . ?
C18 C24 H24A 109.5 . . ?
C18 C24 H24B 109.5 . . ?
H24A C24 H24B 109.5 . . ?
C18 C24 H24C 109.5 . . ?
H24A C24 H24C 109.5 . . ?
H24B C24 H24C 109.5 . . ?
Si1 C25 H25A 109.5 . . ?
Si1 C25 H25B 109.5 . . ?
H25A C25 H25B 109.5 . . ?
Si1 C25 H25C 109.5 . . ?
H25A C25 H25C 109.5 . . ?
H25B C25 H25C 109.5 . . ?
Si1 C26 H26A 109.5 . . ?
Si1 C26 H26B 109.5 . . ?
H26A C26 H26B 109.5 . . ?
Si1 C26 H26C 109.5 . . ?
H26A C26 H26C 109.5 . . ?
H26B C26 H26C 109.5 . . ?
Si1 C27 H27A 109.5 . . ?
Si1 C27 H27B 109.5 . . ?
H27A C27 H27B 109.5 . . ?
Si1 C27 H27C 109.5 . . ?
H27A C27 H27C 109.5 . . ?
H27B C27 H27C 109.5 . . ?
 
loop_
 _geom_torsion_atom_site_label_1
 _geom_torsion_atom_site_label_2
 _geom_torsion_atom_site_label_3
 _geom_torsion_atom_site_label_4
 _geom_torsion
 _geom_torsion_site_symmetry_1
 _geom_torsion_site_symmetry_2
 _geom_torsion_site_symmetry_3
 _geom_torsion_site_symmetry_4
 _geom_torsion_publ_flag
C27 Si1 N1 C1 -101.45(11) . . . . ?
C25 Si1 N1 C1 21.64(11) . . . . ?
C26 Si1 N1 C1 138.04(10) . . . . ?
C27 Si1 N1 Sb1 79.72(9) . . . . ?
C25 Si1 N1 Sb1 -157.20(8) . . . . ?
C26 Si1 N1 Sb1 -40.80(9) . . . . ?
N5 Sb1 N1 C1 -125.65(18) . . . . ?
N2 Sb1 N1 C1 144.59(8) . . . . ?
Cl1 Sb1 N1 C1 -124.6(3) . . . . ?
N5 Sb1 N1 Si1 53.29(18) . . . . ?
N2 Sb1 N1 Si1 -36.47(8) . . . . ?
Cl1 Sb1 N1 Si1 54.3(3) . . . . ?
N1 Sb1 N2 N3 113.51(14) . . . . ?
N5 Sb1 N2 N3 12.1(2) . . . . ?
Cl1 Sb1 N2 N3 5.8(3) . . . . ?
Sb1 N2 N3 N4 177(2) . . . . ?
N1 Sb1 N5 N6 148.2(4) . . . . ?
N2 Sb1 N5 N6 -119.0(4) . . . . ?
Cl1 Sb1 N5 N6 -23(3) . . . . ?
Sb1 N5 N6 N7 173(4) . . . . ?
Si1 N1 C1 C6 -123.08(11) . . . . ?
Sb1 N1 C1 C6 55.89(13) . . . . ?
Si1 N1 C1 C2 58.36(14) . . . . ?
Sb1 N1 C1 C2 -122.67(10) . . . . ?
C6 C1 C2 C3 5.37(17) . . . . ?
N1 C1 C2 C3 -176.04(11) . . . . ?
C6 C1 C2 C7 -171.15(11) . . . . ?
N1 C1 C2 C7 7.43(17) . . . . ?
C1 C2 C3 C4 -1.94(19) . . . . ?
C7 C2 C3 C4 174.88(12) . . . . ?
C2 C3 C4 C5 -1.9(2) . . . . ?
C3 C4 C5 C6 2.3(2) . . . . ?
C4 C5 C6 C1 1.3(2) . . . . ?
C4 C5 C6 C13 -175.70(12) . . . . ?
C2 C1 C6 C5 -5.07(18) . . . . ?
N1 C1 C6 C5 176.33(11) . . . . ?
C2 C1 C6 C13 171.60(11) . . . . ?
N1 C1 C6 C13 -7.00(18) . . . . ?
C3 C2 C7 C8 -113.35(13) . . . . ?
C1 C2 C7 C8 63.27(16) . . . . ?
C3 C2 C7 C12 59.37(15) . . . . ?
C1 C2 C7 C12 -124.00(13) . . . . ?
C12 C7 C8 C9 4.29(17) . . . . ?
C2 C7 C8 C9 177.13(11) . . . . ?
C12 C7 C8 C19 -172.43(11) . . . . ?
C2 C7 C8 C19 0.41(18) . . . . ?
C7 C8 C9 C10 -1.91(19) . . . . ?
C19 C8 C9 C10 174.99(12) . . . . ?
C8 C9 C10 C11 -0.8(2) . . . . ?
C8 C9 C10 C20 -179.29(13) . . . . ?
C9 C10 C11 C12 1.1(2) . . . . ?
C20 C10 C11 C12 179.62(13) . . . . ?
C10 C11 C12 C7 1.3(2) . . . . ?
C10 C11 C12 C21 -176.36(13) . . . . ?
C8 C7 C12 C11 -3.97(18) . . . . ?
C2 C7 C12 C11 -176.76(11) . . . . ?
C8 C7 C12 C21 173.47(12) . . . . ?
C2 C7 C12 C21 0.68(19) . . . . ?
C5 C6 C13 C18 -100.01(15) . . . . ?
C1 C6 C13 C18 83.19(16) . . . . ?
C5 C6 C13 C14 70.86(16) . . . . ?
C1 C6 C13 C14 -105.94(14) . . . . ?
C18 C13 C14 C15 -0.6(2) . . . . ?
C6 C13 C14 C15 -171.69(13) . . . . ?
C18 C13 C14 C22 176.55(13) . . . . ?
C6 C13 C14 C22 5.50(18) . . . . ?
C13 C14 C15 C16 1.6(2) . . . . ?
C22 C14 C15 C16 -175.66(15) . . . . ?
C14 C15 C16 C17 -2.0(3) . . . . ?
C14 C15 C16 C23 177.56(18) . . . . ?
C15 C16 C17 C18 1.5(3) . . . . ?
C23 C16 C17 C18 -178.10(18) . . . . ?
C16 C17 C18 C13 -0.5(2) . . . . ?
C16 C17 C18 C24 177.70(16) . . . . ?
C14 C13 C18 C17 0.1(2) . . . . ?
C6 C13 C18 C17 170.92(13) . . . . ?
C14 C13 C18 C24 -178.10(13) . . . . ?
C6 C13 C18 C24 -7.3(2) . . . . ?
 
_diffrn_measured_fraction_theta_max    0.993
_diffrn_reflns_theta_full              32.50
_diffrn_measured_fraction_theta_full   0.993
_refine_diff_density_max    0.568
_refine_diff_density_min   -0.477
_refine_diff_density_rms    0.065

#=============================================================================
 
data_ch176

_audit_author_name                'Villinger, A.' 
_audit_creation_method            SHELXL-97 

#==============================================================================

# CHEMICAL DATA

_chemical_name_systematic
;
 ?
;
_chemical_name_common             ?
_chemical_melting_point           ?
_chemical_formula_moiety          'C27 H34 Cl0.07 N6.79 Sb Si'
_chemical_formula_sum
 'C27 H34 Cl0.07 N6.79 Sb Si'
_chemical_formula_weight          605.99
 
loop_
 _atom_type_symbol
 _atom_type_description
 _atom_type_scat_dispersion_real
 _atom_type_scat_dispersion_imag
 _atom_type_scat_source
 'C'  'C'   0.0033   0.0016
 'International Tables Vol C Tables 4.2.6.8 and 6.1.1.4'
 'H'  'H'   0.0000   0.0000
 'International Tables Vol C Tables 4.2.6.8 and 6.1.1.4'
 'N'  'N'   0.0061   0.0033
 'International Tables Vol C Tables 4.2.6.8 and 6.1.1.4'
 'Si'  'Si'   0.0817   0.0704
 'International Tables Vol C Tables 4.2.6.8 and 6.1.1.4'
 'Sb'  'Sb'  -0.5866   1.5461
 'International Tables Vol C Tables 4.2.6.8 and 6.1.1.4'
 'Cl'  'Cl'   0.1484   0.1585
 'International Tables Vol C Tables 4.2.6.8 and 6.1.1.4'
 
#==============================================================================

# CRYSTAL DATA
 
_symmetry_cell_setting            triclinic
_symmetry_space_group_name_H-M    'P -1'
_symmetry_space_group_name_Hall   '-P 1'
_symmetry_Int_Tables_number       2
 
loop_
 _symmetry_equiv_pos_as_xyz
 'x, y, z'
 '-x, -y, -z'
 
_cell_length_a                    10.7944(2)
_cell_length_b                    11.6711(2)
_cell_length_c                    12.4607(2)
_cell_angle_alpha                 72.4500(10)
_cell_angle_beta                  71.9320(10)
_cell_angle_gamma                 87.8540(10)
_cell_volume                      1420.23(4)
_cell_formula_units_Z             2
_cell_measurement_temperature     173(2)
_cell_measurement_reflns_used     8937 
_cell_measurement_theta_min       5.241
_cell_measurement_theta_max       56.943
 
_exptl_crystal_description        block
_exptl_crystal_colour             colourless
_exptl_crystal_size_max           0.20
_exptl_crystal_size_mid           0.15
_exptl_crystal_size_min           0.14
_exptl_crystal_density_meas       ?
_exptl_crystal_density_diffrn     1.417
_exptl_crystal_density_method     'not measured'
_exptl_crystal_F_000              619
_exptl_absorpt_coefficient_mu     1.048
_exptl_absorpt_correction_type    multi-scan
_exptl_absorpt_correction_T_min   0.8178
_exptl_absorpt_correction_T_max   0.8672
_exptl_absorpt_process_details    '(SADABS; Sheldrick, 2004)'

#==============================================================================

# EXPERIMENTAL DATA
 
_exptl_special_details
;
 ?
;
 
_diffrn_ambient_temperature       173(2)
_diffrn_radiation_wavelength      0.71073
_diffrn_radiation_type            MoK\a
_diffrn_radiation_source          'sealed tube'
_diffrn_radiation_monochromator   graphite
_diffrn_measurement_device_type   'Bruker Apex Kappa II-CCD-diffractometer'
_diffrn_measurement_method        'phi and omega scans'
_diffrn_detector_area_resol_mean  ?
_diffrn_standards_number          ?
_diffrn_standards_interval_count  ?
_diffrn_standards_interval_time   ?
_diffrn_standards_decay_%         ?
_diffrn_reflns_number             30855
_diffrn_reflns_av_R_equivalents   0.0337
_diffrn_reflns_av_sigmaI/netI     0.0511
_diffrn_reflns_limit_h_min        -16
_diffrn_reflns_limit_h_max        16
_diffrn_reflns_limit_k_min        -17
_diffrn_reflns_limit_k_max        17
_diffrn_reflns_limit_l_min        -18
_diffrn_reflns_limit_l_max        15
_diffrn_reflns_theta_min          3.22
_diffrn_reflns_theta_max          32.50
_reflns_number_total              10109
_reflns_number_gt                 7691
_reflns_threshold_expression      >2\s(I)
 
_computing_data_collection        'Bruker Apex V7.51A'
_computing_cell_refinement        'Bruker Apex V7.51A'
_computing_data_reduction         'Bruker SAINT'
_computing_structure_solution     'SHELXS-97 (Sheldrick, 1997)'
_computing_structure_refinement   'SHELXL-97 (Sheldrick, 1997)'
_computing_molecular_graphics     'ORTEP-3v2.01 (Farrugia, 1997)' 
_computing_publication_material   'SHELXL-97'

#==============================================================================

# REFINEMENT DATA 

_refine_special_details
;
 All H atoms were positioned geometrically and refined using a riding model, 
 with C---H = 0.98 (methyl groups), 0.99\%A (methylene groups), 
 1.00\%A (methine groups) or 0.95 \%A (aryl CH) and with <i>U</i>~iso~(H) = 
 1.5 times <i>U</i>~eq~(C) (methyl groups) or with <i>U</i>~iso~(H) = 1.2 times 
 <i>U</i>~eq~(C) (methylene  groups, aryl CH, methine groups). Torsion angles 
 of all methyl groups were allowed to refine.
 
 Refinement of F^2^ against ALL reflections.  The weighted R-factor wR and
 goodness of fit S are based on F^2^, conventional R-factors R are based
 on F, with F set to zero for negative F^2^. The threshold expression of
 F^2^ > 2\s(F^2^) is used only for calculating R-factors(gt) etc. and is
 not relevant to the choice of reflections for refinement.  R-factors based
 on F^2^ are statistically about twice as large as those based on F, and R-
 factors based on ALL data will be even larger.
;
 
_refine_ls_structure_factor_coef  Fsqd
_refine_ls_matrix_type            full
_refine_ls_weighting_scheme       calc
_refine_ls_weighting_details
 'calc w=1/[\s^2^(Fo^2^)+(0.0346P)^2^+0.1244P] where P=(Fo^2^+2Fc^2^)/3'
_atom_sites_solution_primary      direct
_atom_sites_solution_secondary    difmap
_atom_sites_solution_hydrogens    geom
_refine_ls_hydrogen_treatment     constr
_refine_ls_extinction_method      none
_refine_ls_extinction_coef        ?
_refine_ls_number_reflns          10109
_refine_ls_number_parameters      338
_refine_ls_number_restraints      0
_refine_ls_R_factor_all           0.0611
_refine_ls_R_factor_gt            0.0364
_refine_ls_wR_factor_ref          0.0772
_refine_ls_wR_factor_gt           0.0691
_refine_ls_goodness_of_fit_ref    1.029
_refine_ls_restrained_S_all       1.029
_refine_ls_shift/su_max           0.001
_refine_ls_shift/su_mean          0.000

#==============================================================================

# ATOMIC COORDINATES AND DISPLACEMENT PARAMETERS
 
loop_
 _atom_site_label
 _atom_site_type_symbol
 _atom_site_fract_x
 _atom_site_fract_y
 _atom_site_fract_z
 _atom_site_U_iso_or_equiv
 _atom_site_adp_type
 _atom_site_occupancy
 _atom_site_symmetry_multiplicity
 _atom_site_calc_flag
 _atom_site_refinement_flags
 _atom_site_disorder_assembly
 _atom_site_disorder_group
Sb1 Sb 0.354162(13) 0.386635(11) 0.172291(12) 0.02654(5) Uani 1 1 d . . .
Si1 Si 0.08386(5) 0.27643(5) 0.14723(5) 0.02586(11) Uani 1 1 d . . .
N1 N 0.22280(14) 0.25497(13) 0.19775(13) 0.0212(3) Uani 1 1 d . A .
N2 N 0.34304(19) 0.48037(17) 0.00096(16) 0.0381(4) Uani 1 1 d . A .
N3 N 0.30051(19) 0.57615(18) -0.01973(17) 0.0412(5) Uani 1 1 d . . .
N4 N 0.2612(2) 0.6688(2) -0.0482(2) 0.0637(7) Uani 1 1 d . A .
N5 N 0.2340(5) 0.5092(4) 0.2394(5) 0.0490(8) Uani 0.930(4) 1 d P A 1
N6 N 0.2802(3) 0.57068(19) 0.2847(2) 0.0524(7) Uani 0.930(4) 1 d P A 1
N7 N 0.3154(4) 0.6302(2) 0.3271(3) 0.0859(11) Uani 0.930(4) 1 d P A 1
Cl1 Cl 0.234(3) 0.5403(17) 0.248(2) 0.0490(8) Uani 0.070(4) 1 d P A 2
C1 C 0.25210(16) 0.13899(15) 0.26412(15) 0.0192(3) Uani 1 1 d . A 3
C2 C 0.26628(17) 0.12247(16) 0.37672(16) 0.0222(4) Uani 1 1 d . A 3
C3 C 0.28710(19) 0.00785(17) 0.44427(16) 0.0266(4) Uani 1 1 d . A 3
H3 H 0.2942 -0.0028 0.5207 0.032 Uiso 1 1 calc R A 3
C4 C 0.29745(19) -0.08923(17) 0.40235(17) 0.0269(4) Uani 1 1 d . A 3
H4 H 0.3086 -0.1670 0.4501 0.032 Uiso 1 1 calc R A 3
C5 C 0.29137(18) -0.07206(16) 0.28930(16) 0.0228(4) Uani 1 1 d . A 3
H5 H 0.3013 -0.1387 0.2592 0.027 Uiso 1 1 calc R A 3
C6 C 0.27113(16) 0.04004(16) 0.21821(15) 0.0196(3) Uani 1 1 d . A 3
C7 C 0.26678(19) 0.22187(17) 0.43007(16) 0.0245(4) Uani 1 1 d . A 3
C8 C 0.38616(19) 0.26153(18) 0.43523(17) 0.0271(4) Uani 1 1 d . A 3
C9 C 0.3859(2) 0.3428(2) 0.49721(19) 0.0375(5) Uani 1 1 d . A 3
H9 H 0.4668 0.3711 0.4982 0.045 Uiso 1 1 calc R A 3
C10 C 0.2719(2) 0.3835(2) 0.5572(2) 0.0433(6) Uani 1 1 d . A 3
C11 C 0.1548(2) 0.3445(2) 0.5514(2) 0.0396(5) Uani 1 1 d . A 3
H11 H 0.0758 0.3735 0.5909 0.048 Uiso 1 1 calc R A 3
C12 C 0.1499(2) 0.26417(18) 0.48952(17) 0.0303(4) Uani 1 1 d . A 3
C13 C 0.5144(2) 0.2139(2) 0.37858(19) 0.0342(5) Uani 1 1 d . A 3
H13A H 0.5860 0.2734 0.3588 0.051 Uiso 1 1 calc R A 3
H13B H 0.5117 0.1986 0.3062 0.051 Uiso 1 1 calc R A 3
H13C H 0.5285 0.1387 0.4341 0.051 Uiso 1 1 calc R A 3
C14 C 0.2746(3) 0.4669(3) 0.6293(3) 0.0701(9) Uani 1 1 d . A 3
H14A H 0.3544 0.4572 0.6520 0.105 Uiso 1 1 calc R A 3
H14B H 0.1982 0.4469 0.7007 0.105 Uiso 1 1 calc R A 3
H14C H 0.2728 0.5505 0.5816 0.105 Uiso 1 1 calc R A 3
C15 C 0.0204(2) 0.2207(2) 0.4900(2) 0.0407(5) Uani 1 1 d . A 3
H15A H -0.0500 0.2549 0.5401 0.061 Uiso 1 1 calc R A 3
H15B H 0.0110 0.1326 0.5214 0.061 Uiso 1 1 calc R A 3
H15C H 0.0158 0.2461 0.4090 0.061 Uiso 1 1 calc R A 3
C16 C 0.27800(17) 0.04786(16) 0.09410(15) 0.0205(3) Uani 1 1 d . A 3
C17 C 0.19334(17) -0.02541(16) 0.07277(16) 0.0226(4) Uani 1 1 d . A 3
C18 C 0.20668(19) -0.02045(17) -0.04328(17) 0.0263(4) Uani 1 1 d . A 3
H18 H 0.1479 -0.0689 -0.0569 0.032 Uiso 1 1 calc R A 3
C19 C 0.30260(19) 0.05264(18) -0.13958(16) 0.0265(4) Uani 1 1 d . A 3
C20 C 0.38869(18) 0.12061(17) -0.11720(16) 0.0247(4) Uani 1 1 d . A 3
H20 H 0.4562 0.1702 -0.1820 0.030 Uiso 1 1 calc R A 3
C21 C 0.37935(17) 0.11854(16) -0.00246(16) 0.0224(4) Uani 1 1 d . A 3
C22 C 0.0894(2) -0.11526(19) 0.17012(18) 0.0312(4) Uani 1 1 d . A 3
H22A H 0.0107 -0.1141 0.1465 0.047 Uiso 1 1 calc R A 3
H22B H 0.0684 -0.0935 0.2435 0.047 Uiso 1 1 calc R A 3
H22C H 0.1221 -0.1962 0.1831 0.047 Uiso 1 1 calc R A 3
C23 C 0.3161(2) 0.0562(2) -0.26486(18) 0.0385(5) Uani 1 1 d . A 3
H23A H 0.3017 -0.0254 -0.2669 0.058 Uiso 1 1 calc R A 3
H23B H 0.4040 0.0885 -0.3168 0.058 Uiso 1 1 calc R A 3
H23C H 0.2513 0.1079 -0.2922 0.058 Uiso 1 1 calc R A 3
C24 C 0.48495(18) 0.18835(18) 0.01204(17) 0.0270(4) Uani 1 1 d . A 3
H24A H 0.5708 0.1667 -0.0303 0.040 Uiso 1 1 calc R A 3
H24B H 0.4760 0.1688 0.0964 0.040 Uiso 1 1 calc R A 3
H24C H 0.4766 0.2748 -0.0205 0.040 Uiso 1 1 calc R A 3
C25 C -0.0393(2) 0.1495(2) 0.2397(2) 0.0378(5) Uani 1 1 d . A 3
H25A H -0.0197 0.0814 0.2078 0.057 Uiso 1 1 calc R A 3
H25B H -0.1265 0.1753 0.2387 0.057 Uiso 1 1 calc R A 3
H25C H -0.0366 0.1250 0.3214 0.057 Uiso 1 1 calc R A 3
C26 C 0.1170(2) 0.2901(2) -0.01166(18) 0.0362(5) Uani 1 1 d . A 3
H26A H 0.1859 0.3535 -0.0604 0.054 Uiso 1 1 calc R A 3
H26B H 0.0373 0.3105 -0.0334 0.054 Uiso 1 1 calc R A 3
H26C H 0.1454 0.2134 -0.0250 0.054 Uiso 1 1 calc R A 3
C27 C 0.0087(2) 0.4167(2) 0.1709(2) 0.0396(5) Uani 1 1 d . A 3
H27A H -0.0054 0.4146 0.2531 0.059 Uiso 1 1 calc R A 3
H27B H -0.0752 0.4227 0.1551 0.059 Uiso 1 1 calc R A 3
H27C H 0.0671 0.4867 0.1170 0.059 Uiso 1 1 calc R A 3
 
loop_
 _atom_site_aniso_label
 _atom_site_aniso_U_11
 _atom_site_aniso_U_22
 _atom_site_aniso_U_33
 _atom_site_aniso_U_23
 _atom_site_aniso_U_13
 _atom_site_aniso_U_12
Sb1 0.02794(8) 0.02289(7) 0.02494(7) -0.00223(5) -0.00765(5) -0.00047(5)
Si1 0.0229(3) 0.0296(3) 0.0238(3) -0.0047(2) -0.0096(2) 0.0081(2)
N1 0.0206(7) 0.0210(7) 0.0189(7) -0.0022(6) -0.0060(6) 0.0025(6)
N2 0.0453(11) 0.0319(9) 0.0277(9) 0.0009(8) -0.0078(8) -0.0013(8)
N3 0.0360(11) 0.0420(11) 0.0384(11) 0.0016(9) -0.0140(9) -0.0079(9)
N4 0.0625(15) 0.0423(13) 0.0771(18) 0.0066(12) -0.0335(14) 0.0054(11)
N5 0.0583(14) 0.038(2) 0.0561(16) -0.0214(18) -0.0192(11) 0.0106(19)
N6 0.0842(19) 0.0212(10) 0.0497(15) -0.0094(10) -0.0199(14) 0.0067(11)
N7 0.154(3) 0.0303(13) 0.089(2) -0.0256(15) -0.052(2) 0.0025(16)
Cl1 0.0583(14) 0.038(2) 0.0561(16) -0.0214(18) -0.0192(11) 0.0106(19)
C1 0.0167(8) 0.0214(8) 0.0171(8) -0.0023(7) -0.0053(6) 0.0017(6)
C2 0.0221(9) 0.0256(9) 0.0180(8) -0.0046(7) -0.0072(7) 0.0015(7)
C3 0.0347(11) 0.0280(9) 0.0176(9) -0.0021(7) -0.0136(8) 0.0011(8)
C4 0.0326(10) 0.0228(9) 0.0252(10) -0.0012(7) -0.0151(8) 0.0018(7)
C5 0.0251(9) 0.0214(8) 0.0229(9) -0.0053(7) -0.0104(7) 0.0013(7)
C6 0.0177(8) 0.0236(8) 0.0170(8) -0.0039(7) -0.0071(7) 0.0019(6)
C7 0.0308(10) 0.0253(9) 0.0154(8) -0.0040(7) -0.0065(7) 0.0007(7)
C8 0.0305(10) 0.0296(10) 0.0194(9) -0.0067(8) -0.0061(8) 0.0017(8)
C9 0.0377(12) 0.0412(12) 0.0327(11) -0.0167(10) -0.0032(9) -0.0102(10)
C10 0.0530(15) 0.0367(12) 0.0354(12) -0.0202(10) 0.0030(11) -0.0080(10)
C11 0.0402(13) 0.0391(12) 0.0320(12) -0.0163(10) 0.0042(10) 0.0033(10)
C12 0.0325(11) 0.0334(11) 0.0200(9) -0.0071(8) -0.0022(8) 0.0013(8)
C13 0.0317(11) 0.0429(12) 0.0331(11) -0.0150(10) -0.0143(9) 0.0039(9)
C14 0.075(2) 0.0659(19) 0.070(2) -0.0491(17) 0.0073(16) -0.0155(16)
C15 0.0287(11) 0.0628(15) 0.0256(11) -0.0135(11) -0.0014(9) 0.0027(10)
C16 0.0219(9) 0.0227(8) 0.0177(8) -0.0056(7) -0.0085(7) 0.0052(7)
C17 0.0223(9) 0.0255(9) 0.0195(9) -0.0052(7) -0.0074(7) 0.0020(7)
C18 0.0273(10) 0.0320(10) 0.0235(9) -0.0097(8) -0.0123(8) 0.0023(8)
C19 0.0280(10) 0.0339(10) 0.0186(9) -0.0097(8) -0.0077(8) 0.0062(8)
C20 0.0227(9) 0.0291(9) 0.0187(9) -0.0062(7) -0.0027(7) 0.0025(7)
C21 0.0212(9) 0.0245(9) 0.0218(9) -0.0068(7) -0.0078(7) 0.0047(7)
C22 0.0320(11) 0.0352(11) 0.0250(10) -0.0051(8) -0.0101(9) -0.0075(8)
C23 0.0417(13) 0.0538(14) 0.0201(10) -0.0135(10) -0.0071(9) -0.0036(10)
C24 0.0217(9) 0.0337(10) 0.0243(9) -0.0116(8) -0.0027(8) -0.0002(8)
C25 0.0259(11) 0.0448(13) 0.0403(13) -0.0085(10) -0.0110(9) -0.0019(9)
C26 0.0384(12) 0.0437(12) 0.0272(11) -0.0059(9) -0.0173(9) 0.0149(10)
C27 0.0332(12) 0.0425(13) 0.0421(13) -0.0125(10) -0.0126(10) 0.0172(10)

#==============================================================================

# MOLECULAR GEOMETRY
 
_geom_special_details
;
 All s.u.'s (except the s.u. in the dihedral angle between two l.s. planes)
 are estimated using the full covariance matrix.  The cell s.u.'s are taken
 into account individually in the estimation of s.u.'s in distances, angles
 and torsion angles; correlations between s.u.'s in cell parameters are only
 used when they are defined by crystal symmetry.  An approximate (isotropic)
 treatment of cell s.u.'s is used for estimating s.u.'s involving l.s. planes.
;
 
loop_
 _geom_bond_atom_site_label_1
 _geom_bond_atom_site_label_2
 _geom_bond_distance
 _geom_bond_site_symmetry_2
 _geom_bond_publ_flag
Sb1 N1 2.0156(15) . ?
Sb1 N5 2.082(4) . ?
Sb1 N2 2.1236(18) . ?
Sb1 Cl1 2.421(18) . ?
Si1 N1 1.7806(15) . ?
Si1 C26 1.857(2) . ?
Si1 C25 1.859(2) . ?
Si1 C27 1.863(2) . ?
N1 C1 1.439(2) . ?
N2 N3 1.178(3) . ?
N3 N4 1.141(3) . ?
N5 N6 1.237(6) . ?
N6 N7 1.128(4) . ?
C1 C2 1.413(2) . ?
C1 C6 1.418(2) . ?
C2 C3 1.402(2) . ?
C2 C7 1.502(3) . ?
C3 C4 1.371(3) . ?
C3 H3 0.9500 . ?
C4 C5 1.384(3) . ?
C4 H4 0.9500 . ?
C5 C6 1.394(2) . ?
C5 H5 0.9500 . ?
C6 C16 1.500(2) . ?
C7 C12 1.407(3) . ?
C7 C8 1.412(3) . ?
C8 C9 1.392(3) . ?
C8 C13 1.516(3) . ?
C9 C10 1.377(3) . ?
C9 H9 0.9500 . ?
C10 C11 1.389(3) . ?
C10 C14 1.517(3) . ?
C11 C12 1.394(3) . ?
C11 H11 0.9500 . ?
C12 C15 1.502(3) . ?
C13 H13A 0.9800 . ?
C13 H13B 0.9800 . ?
C13 H13C 0.9800 . ?
C14 H14A 0.9800 . ?
C14 H14B 0.9800 . ?
C14 H14C 0.9800 . ?
C15 H15A 0.9800 . ?
C15 H15B 0.9800 . ?
C15 H15C 0.9800 . ?
C16 C21 1.406(2) . ?
C16 C17 1.408(2) . ?
C17 C18 1.392(3) . ?
C17 C22 1.519(3) . ?
C18 C19 1.385(3) . ?
C18 H18 0.9500 . ?
C19 C20 1.386(3) . ?
C19 C23 1.510(3) . ?
C20 C21 1.395(3) . ?
C20 H20 0.9500 . ?
C21 C24 1.511(3) . ?
C22 H22A 0.9800 . ?
C22 H22B 0.9800 . ?
C22 H22C 0.9800 . ?
C23 H23A 0.9800 . ?
C23 H23B 0.9800 . ?
C23 H23C 0.9800 . ?
C24 H24A 0.9800 . ?
C24 H24B 0.9800 . ?
C24 H24C 0.9800 . ?
C25 H25A 0.9800 . ?
C25 H25B 0.9800 . ?
C25 H25C 0.9800 . ?
C26 H26A 0.9800 . ?
C26 H26B 0.9800 . ?
C26 H26C 0.9800 . ?
C27 H27A 0.9800 . ?
C27 H27B 0.9800 . ?
C27 H27C 0.9800 . ?
 
loop_
 _geom_angle_atom_site_label_1
 _geom_angle_atom_site_label_2
 _geom_angle_atom_site_label_3
 _geom_angle
 _geom_angle_site_symmetry_1
 _geom_angle_site_symmetry_3
 _geom_angle_publ_flag
N1 Sb1 N5 101.55(14) . . ?
N1 Sb1 N2 92.93(7) . . ?
N5 Sb1 N2 89.24(16) . . ?
N1 Sb1 Cl1 107.2(6) . . ?
N5 Sb1 Cl1 5.7(7) . . ?
N2 Sb1 Cl1 89.7(7) . . ?
N1 Si1 C26 115.33(9) . . ?
N1 Si1 C25 108.67(8) . . ?
C26 Si1 C25 109.23(11) . . ?
N1 Si1 C27 108.89(9) . . ?
C26 Si1 C27 107.31(10) . . ?
C25 Si1 C27 107.09(11) . . ?
C1 N1 Si1 122.63(12) . . ?
C1 N1 Sb1 112.34(11) . . ?
Si1 N1 Sb1 125.03(8) . . ?
N3 N2 Sb1 121.67(17) . . ?
N4 N3 N2 175.0(3) . . ?
N6 N5 Sb1 117.0(3) . . ?
N7 N6 N5 175.8(4) . . ?
C2 C1 C6 118.29(15) . . ?
C2 C1 N1 119.96(16) . . ?
C6 C1 N1 121.72(15) . . ?
C3 C2 C1 119.88(17) . . ?
C3 C2 C7 115.54(15) . . ?
C1 C2 C7 124.52(16) . . ?
C4 C3 C2 121.42(17) . . ?
C4 C3 H3 119.3 . . ?
C2 C3 H3 119.3 . . ?
C3 C4 C5 118.89(17) . . ?
C3 C4 H4 120.6 . . ?
C5 C4 H4 120.6 . . ?
C4 C5 C6 122.04(17) . . ?
C4 C5 H5 119.0 . . ?
C6 C5 H5 119.0 . . ?
C5 C6 C1 119.20(16) . . ?
C5 C6 C16 116.28(16) . . ?
C1 C6 C16 124.45(15) . . ?
C12 C7 C8 119.04(18) . . ?
C12 C7 C2 121.46(17) . . ?
C8 C7 C2 118.88(17) . . ?
C9 C8 C7 119.43(18) . . ?
C9 C8 C13 119.14(18) . . ?
C7 C8 C13 121.39(18) . . ?
C10 C9 C8 122.0(2) . . ?
C10 C9 H9 119.0 . . ?
C8 C9 H9 119.0 . . ?
C9 C10 C11 118.2(2) . . ?
C9 C10 C14 120.7(2) . . ?
C11 C10 C14 121.1(2) . . ?
C10 C11 C12 122.0(2) . . ?
C10 C11 H11 119.0 . . ?
C12 C11 H11 119.0 . . ?
C11 C12 C7 119.24(19) . . ?
C11 C12 C15 119.99(19) . . ?
C7 C12 C15 120.73(19) . . ?
C21 C16 C17 118.79(16) . . ?
C21 C16 C6 119.95(15) . . ?
C17 C16 C6 120.85(16) . . ?
C18 C17 C16 119.43(17) . . ?
C18 C17 C22 116.67(16) . . ?
C16 C17 C22 123.85(16) . . ?
C19 C18 C17 122.30(17) . . ?
C19 C18 H18 118.9 . . ?
C17 C18 H18 118.9 . . ?
C18 C19 C20 117.74(17) . . ?
C18 C19 C23 121.54(18) . . ?
C20 C19 C23 120.70(18) . . ?
C19 C20 C21 122.05(17) . . ?
C19 C20 H20 119.0 . . ?
C21 C20 H20 119.0 . . ?
C20 C21 C16 119.56(16) . . ?
C20 C21 C24 117.39(16) . . ?
C16 C21 C24 122.96(16) . . ?
Si1 C25 H25A 109.5 . . ?
Si1 C25 H25B 109.5 . . ?
Si1 C25 H25C 109.5 . . ?
Si1 C26 H26A 109.5 . . ?
Si1 C26 H26B 109.5 . . ?
Si1 C26 H26C 109.5 . . ?
Si1 C27 H27A 109.5 . . ?
Si1 C27 H27B 109.5 . . ?
Si1 C27 H27C 109.5 . . ?
 
loop_
 _geom_torsion_atom_site_label_1
 _geom_torsion_atom_site_label_2
 _geom_torsion_atom_site_label_3
 _geom_torsion_atom_site_label_4
 _geom_torsion
 _geom_torsion_site_symmetry_1
 _geom_torsion_site_symmetry_2
 _geom_torsion_site_symmetry_3
 _geom_torsion_site_symmetry_4
 _geom_torsion_publ_flag
C26 Si1 N1 C1 -101.16(16) . . . . ?
C25 Si1 N1 C1 21.84(17) . . . . ?
C27 Si1 N1 C1 138.17(15) . . . . ?
C26 Si1 N1 Sb1 79.81(13) . . . . ?
C25 Si1 N1 Sb1 -157.19(11) . . . . ?
C27 Si1 N1 Sb1 -40.86(13) . . . . ?
N5 Sb1 N1 C1 -125.56(19) . . . . ?
N2 Sb1 N1 C1 144.62(12) . . . . ?
Cl1 Sb1 N1 C1 -124.8(7) . . . . ?
N5 Sb1 N1 Si1 53.56(18) . . . . ?
N2 Sb1 N1 Si1 -36.26(11) . . . . ?
Cl1 Sb1 N1 Si1 54.3(7) . . . . ?
N1 Sb1 N2 N3 114.07(18) . . . . ?
N5 Sb1 N2 N3 12.5(2) . . . . ?
Cl1 Sb1 N2 N3 6.8(6) . . . . ?
Sb1 N2 N3 N4 179(100) . . . . ?
N1 Sb1 N5 N6 148.9(3) . . . . ?
N2 Sb1 N5 N6 -118.2(4) . . . . ?
Cl1 Sb1 N5 N6 -24(8) . . . . ?
Sb1 N5 N6 N7 177(100) . . . . ?
Si1 N1 C1 C2 -123.41(16) . . . . ?
Sb1 N1 C1 C2 55.73(19) . . . . ?
Si1 N1 C1 C6 58.4(2) . . . . ?
Sb1 N1 C1 C6 -122.45(15) . . . . ?
C6 C1 C2 C3 -5.5(3) . . . . ?
N1 C1 C2 C3 176.21(16) . . . . ?
C6 C1 C2 C7 171.56(17) . . . . ?
N1 C1 C2 C7 -6.7(3) . . . . ?
C1 C2 C3 C4 1.7(3) . . . . ?
C7 C2 C3 C4 -175.70(18) . . . . ?
C2 C3 C4 C5 2.1(3) . . . . ?
C3 C4 C5 C6 -2.0(3) . . . . ?
C4 C5 C6 C1 -2.0(3) . . . . ?
C4 C5 C6 C16 175.01(17) . . . . ?
C2 C1 C6 C5 5.7(2) . . . . ?
N1 C1 C6 C5 -176.11(16) . . . . ?
C2 C1 C6 C16 -171.06(16) . . . . ?
N1 C1 C6 C16 7.1(3) . . . . ?
C3 C2 C7 C12 -99.9(2) . . . . ?
C1 C2 C7 C12 82.9(2) . . . . ?
C3 C2 C7 C8 71.0(2) . . . . ?
C1 C2 C7 C8 -106.2(2) . . . . ?
C12 C7 C8 C9 -1.0(3) . . . . ?
C2 C7 C8 C9 -172.15(18) . . . . ?
C12 C7 C8 C13 176.64(18) . . . . ?
C2 C7 C8 C13 5.5(3) . . . . ?
C7 C8 C9 C10 2.0(3) . . . . ?
C13 C8 C9 C10 -175.7(2) . . . . ?
C8 C9 C10 C11 -2.2(4) . . . . ?
C8 C9 C10 C14 176.7(2) . . . . ?
C9 C10 C11 C12 1.5(4) . . . . ?
C14 C10 C11 C12 -177.4(2) . . . . ?
C10 C11 C12 C7 -0.6(3) . . . . ?
C10 C11 C12 C15 177.5(2) . . . . ?
C8 C7 C12 C11 0.3(3) . . . . ?
C2 C7 C12 C11 171.23(18) . . . . ?
C8 C7 C12 C15 -177.71(18) . . . . ?
C2 C7 C12 C15 -6.8(3) . . . . ?
C5 C6 C16 C21 -113.42(19) . . . . ?
C1 C6 C16 C21 63.4(2) . . . . ?
C5 C6 C16 C17 59.2(2) . . . . ?
C1 C6 C16 C17 -124.01(19) . . . . ?
C21 C16 C17 C18 -4.0(3) . . . . ?
C6 C16 C17 C18 -176.70(16) . . . . ?
C21 C16 C17 C22 173.41(17) . . . . ?
C6 C16 C17 C22 0.7(3) . . . . ?
C16 C17 C18 C19 1.4(3) . . . . ?
C22 C17 C18 C19 -176.27(18) . . . . ?
C17 C18 C19 C20 1.3(3) . . . . ?
C17 C18 C19 C23 179.60(19) . . . . ?
C18 C19 C20 C21 -1.2(3) . . . . ?
C23 C19 C20 C21 -179.52(18) . . . . ?
C19 C20 C21 C16 -1.5(3) . . . . ?
C19 C20 C21 C24 175.14(17) . . . . ?
C17 C16 C21 C20 4.1(3) . . . . ?
C6 C16 C21 C20 176.86(16) . . . . ?
C17 C16 C21 C24 -172.37(16) . . . . ?
C6 C16 C21 C24 0.4(3) . . . . ?
 
_diffrn_measured_fraction_theta_max    0.981
_diffrn_reflns_theta_full              32.50
_diffrn_measured_fraction_theta_full   0.981
_refine_diff_density_max    0.528
_refine_diff_density_min   -0.430
_refine_diff_density_rms    0.088

#=============================================================================
 
data_ch176b

_audit_author_name                'Villinger, A.' 
_audit_creation_method            SHELXL-97 

#==============================================================================

# CHEMICAL DATA

_chemical_name_systematic
;
 ?
;
_chemical_name_common             ?
_chemical_melting_point           ?
_chemical_formula_moiety          'C27 H34 N7 Sb Si'
_chemical_formula_sum
 'C27 H34 N7 Sb Si'
_chemical_formula_weight          606.45
 
loop_
 _atom_type_symbol
 _atom_type_description
 _atom_type_scat_dispersion_real
 _atom_type_scat_dispersion_imag
 _atom_type_scat_source
 'C'  'C'   0.0033   0.0016
 'International Tables Vol C Tables 4.2.6.8 and 6.1.1.4'
 'H'  'H'   0.0000   0.0000
 'International Tables Vol C Tables 4.2.6.8 and 6.1.1.4'
 'N'  'N'   0.0061   0.0033
 'International Tables Vol C Tables 4.2.6.8 and 6.1.1.4'
 'Si'  'Si'   0.0817   0.0704
 'International Tables Vol C Tables 4.2.6.8 and 6.1.1.4'
 'Sb'  'Sb'  -0.5866   1.5461
 'International Tables Vol C Tables 4.2.6.8 and 6.1.1.4'
 
#==============================================================================

# CRYSTAL DATA
 
_symmetry_cell_setting            triclinic
_symmetry_space_group_name_H-M    'P -1'
_symmetry_space_group_name_Hall   '-P 1'
_symmetry_Int_Tables_number       2
 
loop_
 _symmetry_equiv_pos_as_xyz
 'x, y, z'
 '-x, -y, -z'
 
_cell_length_a                    10.7831(2)
_cell_length_b                    11.6904(2)
_cell_length_c                    12.4591(2)
_cell_angle_alpha                 72.4680(10)
_cell_angle_beta                  71.8970(10)
_cell_angle_gamma                 87.8520(10)
_cell_volume                      1420.76(4)
_cell_formula_units_Z             2
_cell_measurement_temperature     173(2)
_cell_measurement_reflns_used     9735
_cell_measurement_theta_min       5.197   
_cell_measurement_theta_max       51.786
 
_exptl_crystal_description        block
_exptl_crystal_colour             colourless
_exptl_crystal_size_max           0.12
_exptl_crystal_size_mid           0.10
_exptl_crystal_size_min           0.04
_exptl_crystal_density_meas       ?
_exptl_crystal_density_diffrn     1.418
_exptl_crystal_density_method     'not measured'
_exptl_crystal_F_000              620
_exptl_absorpt_coefficient_mu     1.042
_exptl_absorpt_correction_type    multi-scan
_exptl_absorpt_correction_T_min   0.8852
_exptl_absorpt_correction_T_max   0.9595
_exptl_absorpt_process_details    '(SADABS; Sheldrick, 2004)'

#==============================================================================

# EXPERIMENTAL DATA
 
_exptl_special_details
;
 ?
;
 
_diffrn_ambient_temperature       173(2)
_diffrn_radiation_wavelength      0.71073
_diffrn_radiation_type            MoK\a
_diffrn_radiation_source          'sealed tube'
_diffrn_radiation_monochromator   graphite
_diffrn_measurement_device_type   'Bruker-Nonius Apex X8-CCD-diffractometer'
_diffrn_measurement_method        'phi and omega scans'
_diffrn_detector_area_resol_mean  ?
_diffrn_standards_number          ?
_diffrn_standards_interval_count  ?
_diffrn_standards_interval_time   ?
_diffrn_standards_decay_%         ?
_diffrn_reflns_number             38126
_diffrn_reflns_av_R_equivalents   0.0429
_diffrn_reflns_av_sigmaI/netI     0.0575
_diffrn_reflns_limit_h_min        -15
_diffrn_reflns_limit_h_max        15
_diffrn_reflns_limit_k_min        -16
_diffrn_reflns_limit_k_max        16
_diffrn_reflns_limit_l_min        -17
_diffrn_reflns_limit_l_max        17
_diffrn_reflns_theta_min          2.94
_diffrn_reflns_theta_max          30.00
_reflns_number_total              8237
_reflns_number_gt                 6207
_reflns_threshold_expression      >2\s(I)
 
_computing_data_collection        'Bruker Apex V7.51A'
_computing_cell_refinement        'Bruker Apex V7.51A'
_computing_data_reduction         'Bruker SAINT'
_computing_structure_solution     'SHELXS-97 (Sheldrick, 1997)'
_computing_structure_refinement   'SHELXL-97 (Sheldrick, 1997)'
_computing_molecular_graphics     'ORTEP-3v2.01 (Farrugia, 1997)' 
_computing_publication_material   'SHELXL-97'

#==============================================================================

# REFINEMENT DATA 

_refine_special_details
;
 All H atoms 
 were positioned geometrically and refined using a riding model, with C---H = 
 0.98 (methyl groups), 0.99\%A (methylene groups), 1.00\%A (methine groups) or 
 0.95 \%A (aryl CH) and with <i>U</i>~iso~(H) = 1.5 times <i>U</i>~eq~(C) 
 (methyl groups) or with <i>U</i>~iso~(H) = 1.2 times <i>U</i>~eq~(C) 
 (methylene  groups, aryl CH, methine groups). Torsion angles of all methyl 
 groups were allowed to refine.
 
 Refinement of F^2^ against ALL reflections.  The weighted R-factor wR and
 goodness of fit S are based on F^2^, conventional R-factors R are based
 on F, with F set to zero for negative F^2^. The threshold expression of
 F^2^ > 2\s(F^2^) is used only for calculating R-factors(gt) etc. and is
 not relevant to the choice of reflections for refinement.  R-factors based
 on F^2^ are statistically about twice as large as those based on F, and R-
 factors based on ALL data will be even larger.
;
 
_refine_ls_structure_factor_coef  Fsqd
_refine_ls_matrix_type            full
_refine_ls_weighting_scheme       calc
_refine_ls_weighting_details
 'calc w=1/[\s^2^(Fo^2^)+(0.0307P)^2^+0.5639P] where P=(Fo^2^+2Fc^2^)/3'
_atom_sites_solution_primary      direct
_atom_sites_solution_secondary    difmap
_atom_sites_solution_hydrogens    geom
_refine_ls_hydrogen_treatment     constr
_refine_ls_extinction_method      none
_refine_ls_extinction_coef        ?
_refine_ls_number_reflns          8237
_refine_ls_number_parameters      334
_refine_ls_number_restraints      0
_refine_ls_R_factor_all           0.0665
_refine_ls_R_factor_gt            0.0382
_refine_ls_wR_factor_ref          0.0766
_refine_ls_wR_factor_gt           0.0681
_refine_ls_goodness_of_fit_ref    1.025
_refine_ls_restrained_S_all       1.025
_refine_ls_shift/su_max           0.001
_refine_ls_shift/su_mean          0.000

#==============================================================================

# ATOMIC COORDINATES AND DISPLACEMENT PARAMETERS
 
loop_
 _atom_site_label
 _atom_site_type_symbol
 _atom_site_fract_x
 _atom_site_fract_y
 _atom_site_fract_z
 _atom_site_U_iso_or_equiv
 _atom_site_adp_type
 _atom_site_occupancy
 _atom_site_symmetry_multiplicity
 _atom_site_calc_flag
 _atom_site_refinement_flags
 _atom_site_disorder_assembly
 _atom_site_disorder_group
Sb1 Sb 0.145015(17) 0.113777(15) 0.328039(15) 0.02725(6) Uani 1 1 d . . .
Si1 Si 0.41595(6) 0.22327(6) 0.35292(6) 0.02665(15) Uani 1 1 d . . .
N1 N 0.27657(18) 0.24479(16) 0.30262(16) 0.0209(4) Uani 1 1 d . . .
N2 N 0.1558(2) 0.0224(2) 0.4979(2) 0.0409(6) Uani 1 1 d . . .
N3 N 0.1999(2) -0.0767(2) 0.5197(2) 0.0402(6) Uani 1 1 d . . .
N4 N 0.2385(3) -0.1681(2) 0.5473(3) 0.0612(8) Uani 1 1 d . . .
N5 N 0.2651(3) -0.0101(2) 0.2610(2) 0.0473(6) Uani 1 1 d . . .
N6 N 0.2192(3) -0.0709(2) 0.2161(2) 0.0544(7) Uani 1 1 d . . .
N7 N 0.1840(4) -0.1305(3) 0.1741(3) 0.0889(12) Uani 1 1 d . . .
C1 C 0.2474(2) 0.3611(2) 0.23597(19) 0.0197(5) Uani 1 1 d . . .
C2 C 0.2285(2) 0.4599(2) 0.28167(19) 0.0200(5) Uani 1 1 d . . .
C3 C 0.2084(2) 0.5713(2) 0.2108(2) 0.0233(5) Uani 1 1 d . . .
H3 H 0.1985 0.6378 0.2411 0.028 Uiso 1 1 calc R . .
C4 C 0.2024(2) 0.5889(2) 0.0978(2) 0.0280(5) Uani 1 1 d . . .
H4 H 0.1913 0.6666 0.0501 0.034 Uiso 1 1 calc R . .
C5 C 0.2128(2) 0.4915(2) 0.0560(2) 0.0278(5) Uani 1 1 d . . .
H5 H 0.2057 0.5021 -0.0205 0.033 Uiso 1 1 calc R . .
C6 C 0.2337(2) 0.3777(2) 0.1229(2) 0.0228(5) Uani 1 1 d . . .
C7 C 0.2220(2) 0.4518(2) 0.40609(19) 0.0200(5) Uani 1 1 d . . .
C8 C 0.1203(2) 0.3814(2) 0.5027(2) 0.0223(5) Uani 1 1 d . . .
C9 C 0.1118(2) 0.3794(2) 0.6170(2) 0.0259(5) Uani 1 1 d . . .
H9 H 0.0446 0.3296 0.6820 0.031 Uiso 1 1 calc R . .
C10 C 0.1975(2) 0.4473(2) 0.6396(2) 0.0272(5) Uani 1 1 d . . .
C11 C 0.2937(2) 0.5204(2) 0.5430(2) 0.0270(5) Uani 1 1 d . . .
H11 H 0.3525 0.5689 0.5566 0.032 Uiso 1 1 calc R . .
C12 C 0.3071(2) 0.5252(2) 0.4270(2) 0.0233(5) Uani 1 1 d . . .
C14 C 0.0148(2) 0.3119(2) 0.4880(2) 0.0276(5) Uani 1 1 d . . .
H14A H 0.0237 0.2256 0.5198 0.041 Uiso 1 1 calc R . .
H14B H 0.0233 0.3321 0.4037 0.041 Uiso 1 1 calc R . .
H14C H -0.0711 0.3329 0.5311 0.041 Uiso 1 1 calc R . .
C15 C 0.1846(3) 0.4438(3) 0.7645(2) 0.0381(7) Uani 1 1 d . . .
H15A H 0.0952 0.4156 0.8159 0.057 Uiso 1 1 calc R . .
H15B H 0.2038 0.5245 0.7657 0.057 Uiso 1 1 calc R . .
H15C H 0.2463 0.3888 0.7931 0.057 Uiso 1 1 calc R . .
C16 C 0.4108(3) 0.6146(2) 0.3294(2) 0.0321(6) Uani 1 1 d . . .
H16A H 0.3787 0.6956 0.3174 0.048 Uiso 1 1 calc R . .
H16B H 0.4304 0.5935 0.2557 0.048 Uiso 1 1 calc R . .
H16C H 0.4904 0.6125 0.3520 0.048 Uiso 1 1 calc R . .
C17 C 0.2331(2) 0.2780(2) 0.0699(2) 0.0251(5) Uani 1 1 d . . .
C18 C 0.3502(2) 0.2360(2) 0.0106(2) 0.0302(6) Uani 1 1 d . . .
C19 C 0.3446(3) 0.1552(3) -0.0513(2) 0.0396(7) Uani 1 1 d . . .
H19 H 0.4237 0.1261 -0.0906 0.048 Uiso 1 1 calc R . .
C20 C 0.2285(3) 0.1165(3) -0.0574(3) 0.0437(7) Uani 1 1 d . . .
C21 C 0.1138(3) 0.1577(2) 0.0030(2) 0.0373(6) Uani 1 1 d . . .
H21 H 0.0328 0.1295 0.0021 0.045 Uiso 1 1 calc R . .
C22 C 0.1134(2) 0.2388(2) 0.0649(2) 0.0279(5) Uani 1 1 d . . .
C23 C 0.4790(3) 0.2786(3) 0.0109(2) 0.0406(7) Uani 1 1 d . . .
H23A H 0.4897 0.3664 -0.0219 0.061 Uiso 1 1 calc R . .
H23B H 0.5496 0.2430 -0.0376 0.061 Uiso 1 1 calc R . .
H23C H 0.4823 0.2544 0.0924 0.061 Uiso 1 1 calc R . .
C24 C 0.2258(4) 0.0331(3) -0.1286(3) 0.0702(11) Uani 1 1 d . . .
H24A H 0.3024 0.0525 -0.2000 0.105 Uiso 1 1 calc R . .
H24B H 0.1460 0.0428 -0.1516 0.105 Uiso 1 1 calc R . .
H24C H 0.2271 -0.0502 -0.0805 0.105 Uiso 1 1 calc R . .
C26 C -0.0148(2) 0.2860(2) 0.1212(2) 0.0341(6) Uani 1 1 d . . .
H26A H -0.0301 0.3597 0.0648 0.051 Uiso 1 1 calc R . .
H26B H -0.0116 0.3035 0.1925 0.051 Uiso 1 1 calc R . .
H26C H -0.0860 0.2254 0.1429 0.051 Uiso 1 1 calc R . .
C27 C 0.4910(3) 0.0834(3) 0.3290(3) 0.0399(7) Uani 1 1 d . . .
H27A H 0.4321 0.0137 0.3824 0.060 Uiso 1 1 calc R . .
H27B H 0.5746 0.0770 0.3454 0.060 Uiso 1 1 calc R . .
H27C H 0.5058 0.0860 0.2466 0.060 Uiso 1 1 calc R . .
[truncated: 141,199 more chars]
